# Supplementary material for: Keratinocyte PIEZO1 modulates cutaneous mechanosensation
Source: eLife. 2022 Sep 2;11:e65987. doi: 10.7554/eLife.65987 (PMC9512397; doi:10.7554/eLife.65987)
Supplement: Figure 1—figure supplement 1—source data 1. [file elife-65987-fig1-figsupp1-data1.xlsx]

## Sheet: Fig 1 Sup 1 B Corneum thickness
K14 Cre- Piezo1	K14 Cre+ Piezo1
81.4	37.2
37.7	43.2
63.1	36.2
90.6	49.2
39.4	68.6
45.9	38.8
41	43.1
54.3	37.1
56.8	77.8
60.8	76.2
53.5	51.8
40.3	46.4
54.2	53.5
68.5	74.6
47.2	39.2
55.8	42.7
33.6	39
66.7	39.1
97.4	40.4
40.5	41.1
45.6	89.4
44.1	38.9
53.5	39.4
55.7	61.5
46.2	57.1
42.7	50.9
32.7	50.1
69.3	66.9
42.9	56.5
41.9	35.5
39.2	52.5
34.1	46.1
40.5	69.2
40.2	71.6
52.9	44
80.1	80.5
44.5	56.5
30.3	70.6
46.4	55.5
69.3	61.8
111	63.1
33.9	39.3
45.8	42.5
55	39.4
57.5	53.1
78.1	71.1
55.9	45.4
51.2	50.5
54.2	64.4
67.4	46.8
52.1	88.7
60.2	46.5
33.3	50.3
58.5	82.3
56.5	82.4
78.9	58.8
63.5	62.9
81.2	52.7
74.2	44.2
50.6	53.8

## Sheet: Fig1 Sup1B Spinosum Thickness
K14 Cre- Piezo1	K14 Cre+ Piezo1
87	50
66.3	53.2
97.5	68
123	93.2
60.2	124
95	51.5
98.2	53.2
74.1	93.1
60.9	140
69.8	105
46	51.1
49.4	46.2
100	57.6
144	97.9
44.4	72.2
55.6	57.9
51.8	58.3
119	82.5
130	103
51.4	47.1
46.5	115
48.2	64.1
70	47.2
91.7	60.3
54	65.3
44.2	58.6
49	53.6
136	76.6
61.5	87.9
65.6	68.5
120	55.2
103	58.7
69.2	107
64.8	116
55.6	67.1
140	122
74.9	68.7
70	57.6
62.6	60.9
65.8	60.2
186	116
57	71.4
54.8	54.3
51.1	48.8
53.1	47.8
130	64.6
65.7	56
52.6	126
59.4	56.2
61	48.2
86.1	51.3
128	45.2
54.7	81.6
101	64
59.4	90.3
57.1	52.4
63.8	86.7
108	100
135	74.7
50.5	52.2
