# Supplementary material for: Keratinocyte PIEZO1 modulates cutaneous mechanosensation
Source: eLife. 2022 Sep 2;11:e65987. doi: 10.7554/eLife.65987 (PMC9512397; doi:10.7554/eLife.65987)
Supplement: Figure 1—source data 1. [file elife-65987-fig1-data1.xlsx]

## Sheet: Figure 1B qPCR
wt	PIEZO1cKO
0.04083	0
0.04556	0
0.040728	0

## Sheet: Fig 1C WT Trace
time (s)
15.237	0.421	0.398	0.894	0.814	0.401	0.38	0.402	0.568	0.47	0.403	0.475	0.557	0.493	0.445	0.386	0.846	0.772	0.571	0.725	0.469	0.586	0.455	0.381	0.433	0.713	0.268	0.415	0.393	0.393	0.829	0.504	0.492	0.519	0.411	0.451	0.477	0.378	0.467	0.37	0.414	0.438	0.305	0.705	0.809	0.477	0.597	0.626	0.598	0.386
17.64	0.422	0.386	0.803	0.786	0.413	0.413	0.396	0.552	0.462	0.438	0.483	0.563	0.447	0.471	0.406	0.893	0.831	0.607	0.65	0.496	0.688	0.5	0.413	0.441	0.789	0.226	0.411	0.412	0.408	0.894	0.525	0.49	0.529	0.419	0.45	0.415	0.388	0.469	0.397	0.42	0.48	0.319	0.671	0.804	0.48	0.56	0.546	0.692	0.395
20.061	0.339	0.374	0.749	0.715	0.357	0.376	0.363	0.498	0.439	0.406	0.437	0.416	0.424	0.423	0.38	0.765	0.721	0.565	0.637	0.469	0.579	0.434	0.392	0.432	0.677	0.224	0.379	0.405	0.395	0.858	0.478	0.463	0.468	0.393	0.437	0.35	0.352	0.443	0.387	0.413	0.433	0.304	0.61	0.754	0.438	0.527	0.576	0.529	0.381
22.492	0.346	0.373	0.753	0.704	0.372	0.388	0.386	0.514	0.46	0.448	0.448	0.564	0.469	0.457	0.403	0.727	0.822	0.51	0.596	0.496	0.579	0.429	0.394	0.416	0.719	0.235	0.406	0.399	0.387	0.836	0.532	0.45	0.503	0.394	0.455	0.375	0.378	0.453	0.4	0.424	0.417	0.302	0.631	0.76	0.443	0.572	0.53	0.647	0.4
24.913	0.407	0.374	0.785	0.685	0.369	0.402	0.35	0.47	0.451	0.417	0.436	0.522	0.429	0.424	0.395	0.755	0.792	0.547	0.617	0.455	0.595	0.421	0.386	0.438	0.697	0.242	0.406	0.407	0.391	0.808	0.495	0.458	0.478	0.394	0.446	0.416	0.4	0.445	0.383	0.42	0.442	0.295	0.594	0.786	0.422	0.525	0.548	0.605	0.383
27.352	0.34	0.361	0.699	0.738	0.379	0.381	0.402	0.469	0.457	0.409	0.464	0.571	0.408	0.431	0.414	0.803	0.744	0.565	0.651	0.484	0.661	0.457	0.382	0.427	0.783	0.221	0.414	0.401	0.406	0.816	0.498	0.495	0.493	0.397	0.454	0.376	0.381	0.44	0.406	0.433	0.434	0.316	0.645	0.719	0.423	0.5	0.49	0.688	0.402
29.737	0.372	0.371	0.759	0.758	0.383	0.37	0.373	0.514	0.444	0.434	0.456	0.6	0.428	0.451	0.406	0.805	0.71	0.534	0.659	0.514	0.585	0.445	0.376	0.416	0.692	0.254	0.436	0.404	0.407	0.825	0.536	0.477	0.479	0.409	0.463	0.392	0.407	0.448	0.405	0.418	0.465	0.311	0.535	0.743	0.445	0.555	0.544	0.647	0.393
32.14	0.371	0.393	0.783	0.771	0.38	0.388	0.35	0.526	0.442	0.455	0.422	0.508	0.433	0.452	0.399	0.787	0.72	0.551	0.662	0.487	0.624	0.449	0.383	0.42	0.667	0.222	0.421	0.42	0.39	0.841	0.52	0.448	0.496	0.397	0.456	0.415	0.414	0.429	0.4	0.436	0.452	0.316	0.558	0.786	0.413	0.53	0.478	0.66	0.396
34.525	0.369	0.384	0.919	0.785	0.392	0.424	0.379	0.5	0.457	0.457	0.491	0.627	0.472	0.47	0.405	0.732	0.707	0.505	0.659	0.472	0.684	0.443	0.396	0.428	0.612	0.207	0.458	0.409	0.4	0.831	0.544	0.484	0.483	0.4	0.463	0.406	0.435	0.455	0.393	0.43	0.452	0.316	0.619	0.775	0.444	0.525	0.527	0.607	0.4
36.964	0.336	0.368	0.787	0.725	0.36	0.399	0.335	0.512	0.437	0.434	0.49	0.613	0.459	0.457	0.419	0.779	0.68	0.516	0.631	0.497	0.681	0.473	0.384	0.466	0.834	0.218	0.442	0.411	0.409	0.906	0.52	0.457	0.493	0.424	0.46	0.407	0.343	0.439	0.4	0.433	0.457	0.312	0.548	0.791	0.42	0.562	0.56	0.584	0.395
39.413	0.35	0.381	0.829	0.701	0.366	0.4	0.359	0.473	0.447	0.414	0.488	0.535	0.442	0.442	0.405	0.807	0.712	0.53	0.65	0.455	0.646	0.44	0.387	0.422	0.652	0.21	0.456	0.41	0.401	0.889	0.516	0.482	0.51	0.405	0.452	0.418	0.398	0.441	0.396	0.414	0.425	0.322	0.647	0.794	0.423	0.529	0.572	0.624	0.386
41.816	0.378	0.401	0.79	0.759	0.376	0.421	0.362	0.517	0.456	0.458	0.489	0.509	0.407	0.461	0.417	0.819	0.726	0.597	0.632	0.495	0.718	0.465	0.399	0.432	0.695	0.228	0.465	0.411	0.407	0.932	0.56	0.475	0.507	0.406	0.467	0.422	0.38	0.455	0.41	0.443	0.443	0.326	0.644	0.777	0.438	0.541	0.564	0.592	0.397
44.255	0.342	0.381	0.748	0.789	0.379	0.392	0.35	0.511	0.455	0.444	0.457	0.577	0.447	0.471	0.42	0.888	0.654	0.561	0.796	0.42	0.716	0.486	0.403	0.45	0.69	0.249	0.469	0.429	0.414	0.973	0.575	0.493	0.541	0.423	0.468	0.395	0.46	0.45	0.408	0.437	0.452	0.335	0.61	0.891	0.412	0.57	0.613	0.583	0.415
46.703	0.364	0.404	0.788	0.697	0.363	0.41	0.394	0.525	0.455	0.426	0.501	0.635	0.435	0.462	0.414	0.851	0.767	0.536	0.755	0.521	0.641	0.449	0.412	0.44	0.78	0.215	0.464	0.426	0.416	0.916	0.521	0.482	0.52	0.432	0.464	0.385	0.427	0.437	0.417	0.454	0.451	0.323	0.604	0.886	0.443	0.512	0.541	0.55	0.406
49.106	0.364	0.39	0.706	0.769	0.367	0.425	0.386	0.514	0.461	0.457	0.489	0.559	0.441	0.489	0.414	0.902	0.736	0.566	0.722	0.485	0.641	0.477	0.41	0.403	0.683	0.242	0.487	0.446	0.423	0.936	0.535	0.489	0.533	0.434	0.485	0.435	0.389	0.466	0.417	0.447	0.473	0.324	0.654	0.872	0.415	0.53	0.595	0.654	0.41
51.545	0.39	0.401	0.808	0.896	0.388	0.436	0.355	0.525	0.446	0.455	0.525	0.567	0.411	0.504	0.418	0.896	0.656	0.597	0.692	0.449	0.7	0.509	0.399	0.463	0.79	0.249	0.497	0.438	0.427	0.995	0.561	0.487	0.534	0.412	0.491	0.394	0.419	0.452	0.418	0.443	0.47	0.347	0.646	0.937	0.419	0.501	0.54	0.631	0.414
53.975	0.363	0.411	0.749	0.749	0.387	0.409	0.383	0.549	0.461	0.439	0.531	0.528	0.434	0.49	0.416	0.905	0.682	0.567	0.789	0.475	0.587	0.443	0.41	0.433	0.742	0.209	0.496	0.442	0.404	0.931	0.603	0.52	0.539	0.424	0.484	0.386	0.337	0.456	0.415	0.425	0.461	0.34	0.624	0.809	0.415	0.575	0.608	0.686	0.417
56.333	0.372	0.403	0.73	0.779	0.396	0.422	0.405	0.518	0.468	0.447	0.57	0.574	0.467	0.482	0.417	0.895	0.73	0.593	0.769	0.424	0.696	0.465	0.407	0.441	0.693	0.265	0.505	0.43	0.422	0.91	0.57	0.516	0.571	0.415	0.489	0.405	0.371	0.455	0.428	0.433	0.447	0.34	0.64	0.797	0.415	0.551	0.579	0.731	0.424
58.719	0.36	0.391	0.738	0.719	0.365	0.423	0.369	0.539	0.454	0.458	0.471	0.504	0.465	0.523	0.416	0.92	0.759	0.548	0.793	0.465	0.695	0.52	0.414	0.442	0.812	0.262	0.527	0.433	0.424	1.026	0.598	0.546	0.528	0.421	0.477	0.411	0.407	0.458	0.432	0.457	0.466	0.346	0.659	0.792	0.466	0.59	0.581	0.695	0.42
61.158	0.536	0.505	0.892	0.95	0.472	0.534	0.552	0.629	0.563	0.549	0.65	0.713	0.553	0.567	0.479	1.111	1.031	0.709	0.946	0.656	0.839	0.516	0.48	0.532	0.859	0.38	0.582	0.484	0.461	1.073	0.658	0.626	0.628	0.499	0.546	0.536	0.502	0.514	0.467	0.518	0.583	0.398	0.84	0.971	0.55	0.675	0.807	0.872	0.463
63.606	0.346	0.365	0.626	0.667	0.362	0.418	0.363	0.473	0.453	0.451	0.459	0.542	0.376	0.474	0.396	0.772	0.58	0.484	0.698	0.439	0.562	0.43	0.387	0.413	0.58	0.242	0.477	0.413	0.387	0.898	0.501	0.488	0.501	0.406	0.469	0.327	0.389	0.43	0.407	0.441	0.424	0.32	0.573	0.773	0.369	0.472	0.464	0.616	0.415
66.009	0.354	0.403	0.686	0.773	0.368	0.42	0.423	0.561	0.452	0.494	0.507	0.609	0.484	0.49	0.405	0.894	0.729	0.55	0.765	0.517	0.726	0.447	0.437	0.443	0.684	0.237	0.535	0.448	0.409	0.984	0.607	0.556	0.56	0.437	0.492	0.46	0.413	0.468	0.421	0.45	0.484	0.334	0.625	0.878	0.448	0.588	0.613	0.685	0.419
68.448	0.353	0.398	0.619	0.693	0.358	0.407	0.338	0.454	0.434	0.423	0.43	0.531	0.402	0.453	0.389	0.78	0.665	0.498	0.78	0.47	0.589	0.449	0.392	0.402	0.597	0.212	0.506	0.412	0.398	0.895	0.581	0.51	0.507	0.387	0.442	0.372	0.392	0.416	0.401	0.436	0.435	0.324	0.523	0.73	0.381	0.482	0.484	0.592	0.408
70.896	0.406	0.415	0.708	0.716	0.378	0.447	0.375	0.541	0.475	0.488	0.533	0.529	0.459	0.513	0.417	0.878	0.687	0.565	0.993	0.494	0.685	0.474	0.425	0.463	0.806	0.23	0.568	0.449	0.434	1.018	0.577	0.573	0.552	0.438	0.497	0.406	0.381	0.482	0.415	0.478	0.448	0.347	0.69	0.875	0.464	0.55	0.588	0.719	0.431
73.317	0.319	0.373	0.634	0.652	0.367	0.442	0.339	0.501	0.462	0.474	0.415	0.483	0.424	0.482	0.409	0.81	0.607	0.547	0.801	0.495	0.55	0.47	0.387	0.414	0.665	0.249	0.51	0.424	0.413	0.888	0.573	0.519	0.52	0.38	0.449	0.378	0.418	0.431	0.404	0.442	0.412	0.341	0.588	0.727	0.402	0.49	0.557	0.564	0.407
75.802	0.329	0.375	0.624	0.608	0.346	0.419	0.375	0.495	0.449	0.498	0.431	0.472	0.426	0.468	0.396	0.76	0.575	0.559	0.801	0.46	0.611	0.425	0.391	0.434	0.727	0.242	0.517	0.417	0.417	0.915	0.528	0.491	0.501	0.405	0.454	0.371	0.361	0.433	0.4	0.426	0.43	0.328	0.555	0.737	0.361	0.488	0.47	0.596	0.416
78.205	0.449	0.45	0.804	0.753	0.413	0.49	0.499	0.575	0.501	0.583	0.585	0.6	0.505	0.524	0.452	0.954	0.842	0.647	1.022	0.701	0.718	0.541	0.459	0.472	0.842	0.295	0.593	0.481	0.449	0.991	0.631	0.601	0.539	0.469	0.494	0.477	0.465	0.474	0.456	0.492	0.533	0.388	0.765	0.857	0.465	0.564	0.607	0.793	0.451
80.653	0.348	0.382	0.608	0.635	0.372	0.415	0.339	0.453	0.439	0.448	0.446	0.447	0.393	0.477	0.384	0.811	0.652	0.541	0.862	0.43	0.546	0.421	0.391	0.421	0.639	0.208	0.532	0.418	0.406	0.914	0.509	0.471	0.476	0.387	0.436	0.359	0.34	0.429	0.391	0.41	0.432	0.321	0.563	0.754	0.392	0.5	0.49	0.547	0.401
83.092	0.494	0.458	0.746	0.786	0.406	0.488	0.472	0.556	0.495	0.563	0.584	0.679	0.525	0.544	0.436	0.922	0.813	0.678	0.94	0.611	0.65	0.504	0.463	0.5	0.93	0.323	0.602	0.481	0.438	0.989	0.639	0.573	0.595	0.468	0.506	0.429	0.488	0.481	0.435	0.467	0.518	0.379	0.701	0.873	0.477	0.568	0.615	0.753	0.437
85.495	0.343	0.396	0.701	0.791	0.379	0.424	0.294	0.539	0.459	0.481	0.51	0.556	0.444	0.489	0.412	0.883	0.761	0.588	0.984	0.465	0.599	0.466	0.454	0.46	0.816	0.259	0.577	0.451	0.418	1.028	0.618	0.567	0.61	0.447	0.476	0.445	0.428	0.465	0.416	0.453	0.472	0.351	0.606	0.915	0.424	0.551	0.519	0.68	0.411
87.943	0.352	0.369	0.558	0.648	0.361	0.419	0.332	0.475	0.438	0.494	0.442	0.535	0.388	0.465	0.383	0.779	0.631	0.55	0.776	0.453	0.561	0.46	0.4	0.394	0.601	0.227	0.55	0.419	0.406	0.912	0.499	0.502	0.512	0.401	0.46	0.363	0.388	0.422	0.407	0.41	0.438	0.338	0.56	0.755	0.391	0.461	0.521	0.588	0.403
90.301	0.477	0.456	0.787	0.818	0.432	0.463	0.469	0.607	0.535	0.57	0.622	0.622	0.519	0.54	0.443	0.906	0.915	0.612	1.022	0.651	0.646	0.504	0.455	0.483	0.915	0.28	0.646	0.466	0.445	1.018	0.574	0.57	0.581	0.469	0.533	0.486	0.449	0.486	0.444	0.487	0.508	0.381	0.743	0.91	0.473	0.598	0.616	0.776	0.446
92.723	0.356	0.367	0.62	0.674	0.348	0.406	0.311	0.483	0.446	0.517	0.438	0.486	0.431	0.452	0.398	0.783	0.551	0.558	0.763	0.454	0.569	0.436	0.375	0.412	0.651	0.267	0.562	0.429	0.395	0.88	0.506	0.499	0.513	0.395	0.471	0.421	0.336	0.417	0.4	0.43	0.408	0.33	0.599	0.716	0.395	0.507	0.525	0.551	0.399
95.126	0.491	0.475	0.759	0.823	0.426	0.492	0.532	0.563	0.518	0.572	0.615	0.678	0.543	0.54	0.445	0.9	0.995	0.642	1.056	0.651	0.765	0.555	0.463	0.485	0.816	0.309	0.63	0.494	0.453	0.991	0.624	0.576	0.639	0.481	0.533	0.45	0.511	0.487	0.464	0.498	0.514	0.379	0.723	0.868	0.478	0.592	0.625	0.79	0.445
97.574	0.342	0.369	0.624	0.596	0.344	0.397	0.338	0.46	0.44	0.491	0.475	0.462	0.431	0.473	0.399	0.754	0.624	0.521	0.808	0.485	0.533	0.415	0.375	0.43	0.662	0.217	0.548	0.427	0.41	0.878	0.505	0.47	0.492	0.377	0.47	0.354	0.382	0.424	0.41	0.416	0.42	0.329	0.537	0.718	0.402	0.504	0.471	0.611	0.404
100.013	0.363	0.391	0.631	0.642	0.347	0.426	0.331	0.466	0.454	0.514	0.453	0.52	0.389	0.479	0.39	0.809	0.644	0.529	0.877	0.401	0.578	0.462	0.369	0.402	0.746	0.259	0.578	0.429	0.409	0.92	0.513	0.484	0.49	0.398	0.46	0.405	0.382	0.429	0.404	0.421	0.459	0.336	0.522	0.769	0.404	0.51	0.544	0.535	0.406
102.416	0.336	0.366	0.61	0.64	0.348	0.432	0.339	0.469	0.431	0.526	0.468	0.477	0.415	0.468	0.395	0.794	0.634	0.538	0.838	0.437	0.553	0.44	0.388	0.407	0.676	0.255	0.572	0.428	0.387	0.909	0.539	0.504	0.516	0.398	0.465	0.355	0.371	0.433	0.398	0.424	0.447	0.33	0.569	0.724	0.404	0.51	0.496	0.618	0.4
104.927	0.47	0.468	0.776	0.802	0.431	0.5	0.537	0.553	0.504	0.638	0.619	0.757	0.586	0.534	0.441	0.936	0.831	0.64	0.968	0.604	0.654	0.526	0.464	0.495	0.821	0.289	0.658	0.478	0.455	0.988	0.629	0.572	0.629	0.46	0.53	0.49	0.494	0.489	0.451	0.513	0.518	0.387	0.719	0.842	0.506	0.626	0.658	0.741	0.448
107.348	0.439	0.457	0.813	0.786	0.417	0.509	0.502	0.593	0.516	0.605	0.568	0.687	0.533	0.526	0.451	0.967	0.812	0.617	0.996	0.587	0.729	0.529	0.471	0.515	0.879	0.294	0.623	0.491	0.438	0.991	0.614	0.568	0.619	0.476	0.53	0.484	0.488	0.486	0.445	0.493	0.523	0.389	0.694	0.814	0.506	0.619	0.643	0.786	0.447
109.77	0.338	0.391	0.636	0.71	0.366	0.419	0.315	0.486	0.45	0.49	0.49	0.478	0.395	0.456	0.388	0.781	0.592	0.528	0.853	0.38	0.528	0.416	0.41	0.411	0.637	0.216	0.565	0.437	0.398	0.902	0.501	0.485	0.553	0.394	0.481	0.355	0.337	0.435	0.393	0.461	0.428	0.317	0.577	0.705	0.417	0.484	0.518	0.571	0.427
112.218	0.301	0.401	0.593	0.629	0.353	0.407	0.361	0.477	0.446	0.517	0.441	0.429	0.475	0.465	0.385	0.87	0.514	0.51	0.847	0.438	0.56	0.455	0.397	0.409	0.675	0.214	0.569	0.429	0.394	0.886	0.516	0.512	0.506	0.396	0.485	0.349	0.35	0.426	0.404	0.434	0.465	0.329	0.643	0.725	0.395	0.489	0.513	0.589	0.419
114.639	0.411	0.441	0.773	0.793	0.412	0.489	0.48	0.552	0.52	0.575	0.629	0.653	0.531	0.543	0.436	1.008	0.831	0.652	1.007	0.609	0.67	0.538	0.457	0.543	0.806	0.348	0.628	0.488	0.455	0.996	0.592	0.588	0.631	0.467	0.537	0.451	0.453	0.482	0.442	0.499	0.584	0.408	0.701	0.849	0.468	0.604	0.631	0.795	0.463
117.141	0.437	0.471	0.776	0.779	0.412	0.484	0.52	0.56	0.533	0.616	0.609	0.627	0.514	0.528	0.435	1.055	0.762	0.638	0.974	0.547	0.713	0.546	0.486	0.547	0.948	0.36	0.641	0.505	0.456	0.989	0.639	0.639	0.651	0.469	0.535	0.43	0.465	0.484	0.431	0.478	0.497	0.413	0.739	0.797	0.503	0.582	0.67	0.717	0.474
119.562	0.31	0.365	0.562	0.608	0.348	0.409	0.371	0.475	0.446	0.503	0.455	0.519	0.429	0.472	0.383	0.873	0.601	0.499	0.782	0.44	0.563	0.426	0.396	0.429	0.683	0.223	0.545	0.425	0.393	0.901	0.48	0.534	0.491	0.39	0.472	0.409	0.354	0.431	0.406	0.407	0.43	0.351	0.606	0.697	0.359	0.476	0.463	0.581	0.415
121.992	0.451	0.471	0.81	0.764	0.416	0.48	0.495	0.579	0.532	0.625	0.655	0.685	0.5	0.521	0.428	1.089	0.837	0.602	0.948	0.644	0.67	0.515	0.458	0.519	0.883	0.321	0.626	0.477	0.445	1.003	0.591	0.63	0.631	0.493	0.522	0.431	0.453	0.474	0.443	0.471	0.524	0.384	0.724	0.859	0.535	0.575	0.609	0.734	0.46
124.449	0.428	0.464	0.806	0.747	0.43	0.473	0.53	0.545	0.506	0.579	0.576	0.615	0.514	0.535	0.441	1.103	0.846	0.652	0.896	0.624	0.653	0.525	0.468	0.496	0.824	0.339	0.62	0.477	0.463	0.961	0.649	0.569	0.651	0.476	0.517	0.446	0.486	0.488	0.435	0.472	0.529	0.395	0.723	0.834	0.486	0.591	0.659	0.753	0.457
126.916	0.483	0.484	0.789	0.839	0.405	0.489	0.526	0.537	0.503	0.589	0.63	0.684	0.572	0.53	0.454	1.172	0.805	0.648	0.806	0.669	0.625	0.517	0.445	0.507	0.822	0.307	0.654	0.467	0.456	1.018	0.61	0.583	0.651	0.473	0.531	0.461	0.458	0.482	0.446	0.465	0.523	0.381	0.761	0.816	0.5	0.581	0.638	0.717	0.451
129.364	0.427	0.466	0.683	0.761	0.425	0.474	0.494	0.558	0.526	0.646	0.651	0.634	0.556	0.545	0.44	1.2	0.879	0.586	0.915	0.595	0.708	0.53	0.447	0.506	0.897	0.356	0.639	0.477	0.452	0.973	0.566	0.578	0.639	0.501	0.525	0.427	0.489	0.491	0.449	0.48	0.566	0.388	0.737	0.803	0.551	0.603	0.585	0.778	0.459
131.767	0.328	0.376	0.6	0.679	0.372	0.405	0.371	0.5	0.433	0.498	0.497	0.513	0.423	0.474	0.397	1.055	0.567	0.515	0.77	0.442	0.539	0.462	0.397	0.395	0.658	0.208	0.56	0.437	0.406	0.853	0.495	0.498	0.569	0.422	0.45	0.322	0.332	0.434	0.4	0.423	0.451	0.333	0.53	0.641	0.406	0.462	0.537	0.536	0.415
134.206	0.31	0.385	0.593	0.606	0.363	0.401	0.366	0.481	0.432	0.497	0.487	0.531	0.469	0.49	0.402	1.053	0.609	0.509	0.787	0.434	0.545	0.472	0.395	0.41	0.685	0.279	0.573	0.432	0.399	0.883	0.484	0.491	0.567	0.403	0.456	0.383	0.364	0.426	0.396	0.411	0.427	0.327	0.548	0.657	0.425	0.511	0.533	0.497	0.427
136.654	0.29	0.381	0.569	0.63	0.357	0.426	0.358	0.418	0.458	0.484	0.457	0.454	0.383	0.485	0.384	1.071	0.564	0.539	0.779	0.471	0.556	0.453	0.404	0.396	0.659	0.236	0.575	0.436	0.39	0.895	0.529	0.491	0.55	0.414	0.454	0.341	0.319	0.426	0.395	0.411	0.433	0.341	0.568	0.723	0.413	0.464	0.497	0.609	0.427
139.075	0.431	0.465	0.815	0.785	0.418	0.489	0.445	0.565	0.496	0.622	0.581	0.648	0.581	0.522	0.457	1.38	0.834	0.618	1.004	0.618	0.751	0.548	0.461	0.494	0.806	0.343	0.656	0.488	0.459	1.014	0.631	0.588	0.685	0.527	0.504	0.428	0.486	0.485	0.439	0.477	0.567	0.39	0.724	0.824	0.535	0.591	0.679	0.813	0.46
141.595	0.347	0.401	0.701	0.661	0.335	0.411	0.329	0.477	0.453	0.561	0.466	0.408	0.459	0.454	0.41	1.166	0.671	0.54	0.705	0.517	0.595	0.479	0.399	0.429	0.661	0.246	0.552	0.441	0.398	0.908	0.509	0.513	0.563	0.423	0.456	0.383	0.388	0.415	0.407	0.431	0.458	0.342	0.567	0.695	0.42	0.462	0.502	0.566	0.415
143.998	0.335	0.369	0.627	0.644	0.368	0.41	0.333	0.453	0.449	0.513	0.472	0.439	0.438	0.442	0.398	1.087	0.569	0.518	0.737	0.494	0.576	0.463	0.421	0.388	0.606	0.249	0.581	0.445	0.404	0.926	0.481	0.491	0.559	0.439	0.464	0.395	0.397	0.406	0.405	0.414	0.448	0.334	0.528	0.678	0.442	0.454	0.482	0.585	0.41
146.447	0.425	0.431	0.777	0.817	0.415	0.478	0.467	0.541	0.518	0.591	0.606	0.691	0.547	0.555	0.456	1.228	0.819	0.602	0.925	0.63	0.754	0.571	0.478	0.474	0.752	0.343	0.615	0.496	0.449	0.988	0.618	0.57	0.691	0.478	0.541	0.435	0.467	0.486	0.444	0.488	0.5	0.391	0.726	0.778	0.518	0.567	0.63	0.781	0.472
148.868	0.377	0.387	0.643	0.715	0.36	0.43	0.319	0.433	0.457	0.489	0.516	0.502	0.441	0.476	0.407	1.01	0.592	0.559	0.761	0.513	0.57	0.496	0.403	0.406	0.63	0.293	0.56	0.441	0.426	0.92	0.461	0.496	0.504	0.44	0.489	0.375	0.317	0.43	0.413	0.435	0.446	0.358	0.526	0.701	0.411	0.471	0.53	0.603	0.427
151.271	0.324	0.39	0.62	0.669	0.369	0.417	0.356	0.454	0.473	0.495	0.508	0.541	0.432	0.491	0.396	1.129	0.601	0.529	0.814	0.458	0.54	0.474	0.393	0.407	0.557	0.195	0.555	0.448	0.407	0.895	0.501	0.53	0.555	0.431	0.502	0.379	0.403	0.433	0.404	0.436	0.44	0.335	0.504	0.645	0.456	0.465	0.455	0.706	0.428
153.719	0.343	0.365	0.631	0.695	0.356	0.423	0.342	0.439	0.463	0.514	0.485	0.514	0.423	0.495	0.396	1.076	0.577	0.563	0.754	0.467	0.585	0.497	0.397	0.411	0.624	0.247	0.534	0.444	0.403	0.894	0.455	0.531	0.569	0.43	0.49	0.352	0.338	0.437	0.411	0.427	0.401	0.339	0.574	0.668	0.407	0.488	0.488	0.625	0.435
156.14	0.339	0.375	0.677	0.672	0.378	0.433	0.389	0.462	0.459	0.499	0.461	0.526	0.484	0.484	0.409	1.046	0.67	0.538	0.689	0.439	0.512	0.472	0.391	0.399	0.565	0.239	0.555	0.424	0.4	0.926	0.469	0.496	0.557	0.417	0.489	0.336	0.401	0.41	0.411	0.427	0.424	0.341	0.523	0.704	0.433	0.507	0.465	0.598	0.421
158.543	0.33	0.404	0.618	0.634	0.376	0.411	0.351	0.446	0.477	0.54	0.477	0.482	0.423	0.471	0.399	0.927	0.615	0.554	0.705	0.491	0.578	0.468	0.415	0.391	0.58	0.244	0.547	0.442	0.416	0.914	0.511	0.503	0.56	0.427	0.498	0.347	0.343	0.426	0.427	0.42	0.444	0.352	0.602	0.669	0.431	0.47	0.473	0.608	0.424
160.982	0.36	0.394	0.616	0.716	0.369	0.436	0.397	0.468	0.464	0.505	0.476	0.53	0.439	0.456	0.394	1.007	0.592	0.572	0.67	0.422	0.592	0.472	0.392	0.408	0.596	0.254	0.555	0.457	0.394	0.922	0.497	0.517	0.602	0.448	0.478	0.381	0.331	0.433	0.413	0.441	0.478	0.338	0.562	0.678	0.459	0.471	0.502	0.57	0.422
163.449	0.328	0.394	0.648	0.645	0.365	0.428	0.361	0.455	0.48	0.508	0.533	0.555	0.484	0.501	0.401	0.974	0.602	0.52	0.726	0.434	0.58	0.483	0.404	0.369	0.611	0.243	0.572	0.435	0.4	0.869	0.528	0.522	0.546	0.421	0.499	0.361	0.37	0.437	0.402	0.424	0.431	0.347	0.566	0.711	0.437	0.472	0.557	0.677	0.428
165.915	0.373	0.398	0.607	0.635	0.363	0.412	0.328	0.494	0.47	0.493	0.483	0.535	0.453	0.482	0.399	0.929	0.632	0.514	0.762	0.448	0.58	0.478	0.408	0.423	0.737	0.224	0.58	0.438	0.418	0.916	0.479	0.512	0.559	0.419	0.471	0.329	0.379	0.432	0.403	0.438	0.443	0.359	0.566	0.698	0.415	0.475	0.507	0.647	0.426
168.381	0.31	0.402	0.629	0.586	0.374	0.43	0.343	0.483	0.466	0.52	0.494	0.511	0.461	0.487	0.405	0.933	0.677	0.504	0.638	0.507	0.555	0.496	0.395	0.384	0.618	0.302	0.575	0.432	0.404	0.865	0.499	0.504	0.543	0.425	0.489	0.388	0.373	0.432	0.414	0.447	0.436	0.339	0.594	0.693	0.435	0.462	0.443	0.613	0.432
170.766	0.341	0.395	0.615	0.665	0.373	0.419	0.349	0.429	0.453	0.494	0.474	0.445	0.446	0.462	0.393	0.9	0.532	0.555	0.669	0.419	0.573	0.512	0.394	0.4	0.626	0.259	0.541	0.439	0.398	0.921	0.47	0.505	0.544	0.406	0.469	0.33	0.336	0.43	0.41	0.442	0.407	0.35	0.568	0.719	0.414	0.444	0.49	0.606	0.411
173.223	0.331	0.406	0.668	0.613	0.369	0.414	0.366	0.49	0.467	0.512	0.474	0.484	0.475	0.488	0.398	0.995	0.587	0.572	0.715	0.405	0.613	0.507	0.409	0.39	0.571	0.27	0.567	0.425	0.397	0.854	0.485	0.507	0.52	0.422	0.484	0.334	0.361	0.426	0.416	0.427	0.465	0.356	0.58	0.716	0.462	0.496	0.482	0.589	0.429
175.653	0.293	0.385	0.611	0.628	0.367	0.437	0.37	0.449	0.451	0.488	0.461	0.54	0.472	0.475	0.397	0.941	0.565	0.546	0.747	0.451	0.598	0.451	0.404	0.397	0.603	0.275	0.562	0.421	0.398	0.897	0.486	0.498	0.503	0.423	0.479	0.375	0.371	0.433	0.417	0.438	0.47	0.362	0.62	0.746	0.428	0.468	0.495	0.596	0.419
178.11	0.338	0.379	0.586	0.657	0.363	0.431	0.335	0.499	0.455	0.516	0.49	0.474	0.408	0.474	0.401	0.886	0.557	0.51	0.683	0.413	0.584	0.474	0.398	0.425	0.668	0.222	0.554	0.418	0.409	0.851	0.508	0.499	0.502	0.413	0.472	0.351	0.34	0.423	0.417	0.432	0.454	0.36	0.555	0.639	0.458	0.5	0.531	0.615	0.421
180.577	0.329	0.386	0.569	0.676	0.362	0.431	0.332	0.49	0.478	0.496	0.525	0.476	0.468	0.491	0.392	0.906	0.642	0.523	0.695	0.458	0.549	0.463	0.401	0.404	0.65	0.218	0.564	0.431	0.405	0.888	0.491	0.515	0.529	0.43	0.478	0.359	0.378	0.427	0.415	0.435	0.439	0.346	0.527	0.704	0.415	0.479	0.494	0.598	0.431
183.007	0.315	0.399	0.63	0.639	0.374	0.434	0.323	0.469	0.49	0.506	0.505	0.502	0.487	0.509	0.4	0.909	0.627	0.521	0.625	0.512	0.584	0.485	0.383	0.415	0.588	0.257	0.54	0.432	0.398	0.852	0.526	0.513	0.524	0.41	0.482	0.35	0.39	0.436	0.422	0.452	0.47	0.35	0.494	0.643	0.459	0.456	0.443	0.641	0.437
185.527	0.332	0.386	0.584	0.665	0.376	0.425	0.338	0.447	0.471	0.512	0.48	0.486	0.443	0.49	0.419	0.95	0.647	0.53	0.72	0.452	0.599	0.487	0.413	0.402	0.559	0.243	0.572	0.433	0.405	0.865	0.507	0.489	0.507	0.421	0.479	0.405	0.354	0.425	0.428	0.436	0.474	0.356	0.558	0.693	0.427	0.494	0.461	0.533	0.425
187.993	0.452	0.467	0.767	0.722	0.43	0.502	0.484	0.581	0.558	0.639	0.633	0.674	0.605	0.568	0.443	1.031	0.749	0.634	0.889	0.56	0.697	0.553	0.487	0.529	0.84	0.338	0.622	0.487	0.454	1.018	0.642	0.603	0.635	0.486	0.551	0.419	0.479	0.493	0.448	0.478	0.503	0.423	0.705	0.834	0.523	0.578	0.726	0.851	0.46
190.459	0.354	0.388	0.597	0.688	0.396	0.455	0.354	0.477	0.444	0.496	0.556	0.453	0.432	0.468	0.4	0.874	0.619	0.5	0.643	0.381	0.563	0.465	0.409	0.41	0.622	0.22	0.524	0.442	0.398	0.913	0.57	0.509	0.518	0.414	0.478	0.347	0.354	0.423	0.417	0.413	0.445	0.351	0.532	0.677	0.428	0.477	0.475	0.573	0.421
192.898	0.355	0.402	0.603	0.675	0.371	0.435	0.397	0.489	0.501	0.526	0.513	0.466	0.458	0.459	0.399	0.837	0.642	0.53	0.646	0.415	0.583	0.506	0.4	0.413	0.578	0.238	0.538	0.424	0.412	0.938	0.535	0.493	0.501	0.42	0.467	0.346	0.374	0.429	0.414	0.43	0.436	0.357	0.543	0.644	0.42	0.473	0.576	0.559	0.422
195.4	0.35	0.413	0.648	0.712	0.399	0.453	0.386	0.447	0.508	0.527	0.53	0.528	0.459	0.475	0.408	0.928	0.631	0.54	0.715	0.478	0.594	0.478	0.413	0.416	0.689	0.256	0.551	0.445	0.415	0.962	0.548	0.566	0.566	0.432	0.484	0.327	0.391	0.427	0.428	0.449	0.443	0.373	0.535	0.655	0.446	0.491	0.545	0.617	0.428
197.849	0.334	0.418	0.623	0.674	0.366	0.417	0.37	0.488	0.453	0.543	0.474	0.455	0.512	0.483	0.411	1.059	0.592	0.571	0.64	0.485	0.566	0.522	0.379	0.416	0.535	0.239	0.553	0.434	0.422	0.953	0.52	0.535	0.552	0.428	0.488	0.357	0.313	0.433	0.428	0.439	0.451	0.374	0.533	0.71	0.438	0.542	0.562	0.65	0.436
200.333	0.293	0.391	0.602	0.616	0.359	0.424	0.339	0.447	0.426	0.532	0.414	0.468	0.544	0.47	0.408	0.911	0.598	0.481	0.65	0.404	0.572	0.462	0.389	0.388	0.532	0.201	0.517	0.404	0.385	0.901	0.509	0.505	0.541	0.408	0.463	0.331	0.375	0.424	0.424	0.45	0.399	0.347	0.532	0.656	0.403	0.52	0.47	0.558	0.416
202.754	0.361	0.398	0.579	0.62	0.365	0.439	0.362	0.469	0.473	0.529	0.447	0.485	0.485	0.507	0.398	0.918	0.553	0.471	0.583	0.413	0.553	0.48	0.38	0.437	0.503	0.26	0.526	0.433	0.391	0.908	0.51	0.517	0.503	0.404	0.467	0.344	0.329	0.415	0.411	0.434	0.402	0.371	0.516	0.645	0.463	0.499	0.485	0.579	0.423
205.22	0.315	0.378	0.551	0.661	0.391	0.421	0.326	0.448	0.491	0.477	0.506	0.535	0.456	0.486	0.405	0.961	0.562	0.477	0.623	0.482	0.606	0.468	0.422	0.421	0.535	0.158	0.548	0.428	0.4	0.94	0.548	0.515	0.537	0.418	0.492	0.351	0.353	0.416	0.421	0.448	0.41	0.354	0.518	0.672	0.423	0.475	0.503	0.584	0.425
207.623	0.301	0.355	0.525	0.58	0.337	0.388	0.34	0.392	0.437	0.461	0.415	0.474	0.379	0.459	0.38	0.827	0.454	0.447	0.489	0.448	0.496	0.432	0.344	0.349	0.465	0.19	0.485	0.392	0.361	0.815	0.433	0.459	0.467	0.392	0.45	0.28	0.304	0.397	0.388	0.419	0.383	0.318	0.424	0.575	0.375	0.42	0.441	0.556	0.399
210.044	0.295	0.353	0.51	0.562	0.344	0.39	0.284	0.415	0.419	0.465	0.449	0.375	0.413	0.425	0.387	0.822	0.477	0.415	0.586	0.335	0.487	0.4	0.348	0.367	0.484	0.182	0.51	0.395	0.367	0.856	0.43	0.478	0.463	0.382	0.44	0.316	0.312	0.39	0.401	0.424	0.379	0.326	0.476	0.552	0.375	0.441	0.428	0.516	0.389
212.573	0.398	0.447	0.696	0.717	0.392	0.462	0.445	0.504	0.502	0.562	0.562	0.552	0.54	0.524	0.42	0.96	0.639	0.522	0.706	0.508	0.592	0.493	0.427	0.456	0.63	0.309	0.578	0.456	0.417	0.907	0.553	0.528	0.542	0.467	0.503	0.41	0.478	0.444	0.429	0.47	0.477	0.397	0.639	0.67	0.502	0.551	0.573	0.711	0.443
215.364	0.313	0.375	0.565	0.635	0.342	0.411	0.273	0.401	0.451	0.51	0.444	0.391	0.461	0.447	0.379	0.891	0.554	0.427	0.683	0.395	0.434	0.407	0.378	0.344	0.588	0.194	0.514	0.401	0.362	0.842	0.456	0.486	0.467	0.405	0.442	0.348	0.316	0.391	0.406	0.429	0.394	0.341	0.468	0.577	0.405	0.446	0.421	0.509	0.407
217.785	0.427	0.429	0.736	0.777	0.394	0.477	0.442	0.484	0.503	0.568	0.599	0.621	0.52	0.517	0.438	1.044	0.783	0.553	0.807	0.614	0.601	0.511	0.432	0.46	0.662	0.345	0.596	0.463	0.419	0.976	0.549	0.537	0.551	0.477	0.533	0.405	0.412	0.453	0.444	0.501	0.505	0.386	0.637	0.697	0.449	0.538	0.552	0.693	0.46
220.233	0.424	0.425	0.721	0.776	0.392	0.46	0.461	0.516	0.508	0.618	0.565	0.615	0.493	0.507	0.421	0.959	0.718	0.585	0.763	0.609	0.64	0.503	0.415	0.469	0.722	0.305	0.612	0.455	0.418	0.942	0.528	0.552	0.564	0.45	0.532	0.412	0.399	0.453	0.434	0.468	0.479	0.391	0.668	0.652	0.474	0.559	0.612	0.702	0.447
222.708	0.442	0.41	0.784	0.846	0.419	0.503	0.464	0.473	0.494	0.631	0.589	0.607	0.517	0.52	0.428	0.962	0.802	0.524	0.791	0.589	0.674	0.519	0.421	0.452	0.721	0.299	0.599	0.454	0.425	0.899	0.54	0.53	0.532	0.453	0.525	0.386	0.441	0.434	0.432	0.468	0.474	0.391	0.649	0.674	0.497	0.547	0.544	0.691	0.442
225.174	0.413	0.449	0.739	0.769	0.4	0.475	0.451	0.489	0.509	0.634	0.587	0.604	0.538	0.539	0.437	1.005	0.808	0.572	0.935	0.647	0.64	0.509	0.446	0.467	0.675	0.325	0.625	0.456	0.434	0.991	0.567	0.551	0.539	0.463	0.527	0.449	0.429	0.45	0.435	0.481	0.461	0.388	0.672	0.702	0.482	0.585	0.609	0.724	0.45
227.64	0.417	0.43	0.674	0.787	0.406	0.498	0.532	0.462	0.501	0.763	0.602	0.643	0.582	0.512	0.447	1.059	0.803	0.578	0.955	0.554	0.651	0.517	0.426	0.443	0.877	0.279	0.641	0.448	0.428	0.988	0.553	0.538	0.572	0.474	0.527	0.389	0.488	0.445	0.434	0.489	0.49	0.394	0.702	0.725	0.451	0.554	0.55	0.726	0.453
230.124	0.434	0.46	0.833	0.832	0.411	0.501	0.494	0.479	0.527	0.744	0.67	0.715	0.629	0.57	0.423	1.177	0.81	0.582	1.119	0.571	0.702	0.543	0.45	0.471	0.9	0.333	0.619	0.472	0.427	1.045	0.565	0.57	0.579	0.476	0.564	0.415	0.471	0.459	0.419	0.49	0.527	0.404	0.682	0.758	0.491	0.591	0.585	0.793	0.467
232.573	0.419	0.443	0.812	0.779	0.39	0.494	0.495	0.479	0.518	0.736	0.709	0.674	0.614	0.563	0.448	1.18	0.99	0.592	1.063	0.573	0.789	0.51	0.446	0.457	1.071	0.331	0.675	0.465	0.439	0.939	0.618	0.611	0.59	0.483	0.553	0.395	0.437	0.472	0.428	0.5	0.479	0.397	0.801	0.669	0.459	0.566	0.563	0.795	0.471
234.994	0.448	0.433	0.805	0.891	0.43	0.509	0.48	0.481	0.511	0.81	0.711	0.664	0.659	0.554	0.438	1.192	1.037	0.595	1.224	0.583	0.767	0.541	0.439	0.428	0.946	0.327	0.699	0.482	0.438	1.022	0.613	0.569	0.578	0.471	0.55	0.435	0.44	0.469	0.435	0.493	0.518	0.378	0.74	0.75	0.478	0.582	0.606	0.768	0.465
237.46	0.317	0.386	0.758	0.832	0.372	0.429	0.334	0.431	0.46	0.704	0.635	0.589	0.605	0.496	0.408	1.195	0.731	0.478	1.171	0.456	0.62	0.444	0.369	0.365	1.045	0.247	0.624	0.406	0.386	0.916	0.493	0.485	0.501	0.402	0.508	0.371	0.345	0.433	0.395	0.421	0.414	0.335	0.59	0.729	0.425	0.485	0.461	0.605	0.418
239.863	0.47	0.486	0.991	1.039	0.422	0.533	0.572	0.511	0.541	0.804	0.819	0.729	0.867	0.616	0.473	1.396	1.046	0.644	1.411	0.596	0.76	0.563	0.463	0.445	1.191	0.297	0.731	0.481	0.448	1.085	0.639	0.616	0.596	0.509	0.574	0.478	0.466	0.489	0.441	0.492	0.529	0.407	0.773	0.859	0.561	0.597	0.651	0.865	0.464
242.347	0.391	0.437	0.932	1.046	0.416	0.534	0.536	0.524	0.547	0.976	0.906	0.842	0.888	0.639	0.494	1.507	1.065	0.651	1.386	0.697	0.847	0.608	0.457	0.446	1.344	0.368	0.789	0.49	0.458	1.052	0.648	0.621	0.63	0.49	0.584	0.459	0.478	0.504	0.44	0.481	0.49	0.41	0.922	0.986	0.576	0.643	0.655	0.805	0.483
244.804	0.463	0.507	1.031	1.2	0.424	0.541	0.587	0.517	0.55	0.918	0.88	0.962	0.974	0.696	0.484	1.645	1.169	0.702	1.613	0.653	1.018	0.634	0.485	0.488	1.439	0.354	0.862	0.492	0.478	1.168	0.699	0.651	0.641	0.517	0.583	0.493	0.491	0.499	0.434	0.495	0.547	0.443	0.88	0.918	0.536	0.656	0.649	0.914	0.493
247.234	0.49	0.515	1.093	1.218	0.477	0.615	0.63	0.544	0.566	1.057	0.979	0.948	1.105	0.756	0.516	1.703	1.241	0.667	1.774	0.558	1.05	0.633	0.491	0.51	1.391	0.348	0.921	0.494	0.486	1.259	0.742	0.668	0.695	0.543	0.592	0.437	0.482	0.512	0.452	0.516	0.532	0.441	0.867	1.077	0.525	0.661	0.661	0.916	0.491
249.737	0.466	0.511	1.277	1.232	0.449	0.584	0.658	0.592	0.583	1.138	0.981	0.999	1.131	0.91	0.492	1.834	1.194	0.667	1.631	0.718	1.12	0.658	0.494	0.504	1.457	0.387	0.955	0.504	0.497	1.337	0.745	0.641	0.728	0.555	0.585	0.505	0.498	0.528	0.443	0.49	0.577	0.457	1.015	1.132	0.581	0.714	0.734	0.96	0.502
252.158	0.48	0.546	1.208	1.344	0.44	0.617	0.565	0.635	0.614	1.197	1.062	1.132	1.332	0.971	0.547	1.845	1.243	0.758	1.678	0.648	1.409	0.733	0.496	0.547	1.47	0.366	0.976	0.525	0.52	1.404	0.785	0.679	0.77	0.557	0.621	0.538	0.586	0.546	0.457	0.499	0.664	0.512	0.978	1.175	0.606	0.739	0.699	1.111	0.512
254.669	0.492	0.555	1.312	1.52	0.469	0.637	0.657	0.606	0.627	1.307	1.059	1.013	1.616	0.983	0.549	1.9	1.106	0.775	1.695	0.698	1.41	0.777	0.53	0.56	1.44	0.453	1.157	0.536	0.529	1.548	0.869	0.723	0.795	0.579	0.607	0.561	0.544	0.525	0.445	0.5	0.703	0.511	1.126	1.348	0.623	0.763	0.693	1.095	0.507
257.09	0.517	0.558	1.336	1.485	0.481	0.739	0.694	0.662	0.671	1.459	1.063	1.347	1.526	1.058	0.57	2.272	1.095	0.881	1.615	0.717	1.959	0.78	0.521	0.575	1.48	0.398	1.166	0.553	0.558	1.544	0.974	0.803	0.841	0.587	0.658	0.515	0.538	0.542	0.458	0.54	0.721	0.528	1.193	1.259	0.604	0.812	0.719	1.163	0.53
259.61	0.391	0.503	1.207	1.277	0.434	0.581	0.454	0.538	0.611	1.378	0.877	0.97	1.309	1.02	0.521	1.79	0.95	0.734	1.332	0.456	1.507	0.611	0.444	0.436	1.098	0.301	1.116	0.501	0.494	1.45	0.829	0.725	0.726	0.513	0.571	0.475	0.433	0.506	0.406	0.459	0.772	0.453	0.916	1.248	0.539	0.63	0.58	0.995	0.499
262.013	0.439	0.549	1.322	1.418	0.482	0.691	0.688	0.633	0.641	1.484	1.031	1.216	1.493	1.018	0.573	1.858	1.328	0.829	1.796	0.712	1.68	0.686	0.521	0.491	1.807	0.388	1.193	0.542	0.551	1.461	0.881	0.808	0.838	0.579	0.632	0.542	0.541	0.546	0.446	0.494	0.767	0.506	1.175	1.405	0.661	0.782	0.646	1.233	0.538
264.479	0.379	0.573	1.171	1.259	0.396	0.619	0.583	0.644	0.638	1.53	0.974	1.139	1.404	1.081	0.595	1.949	1.149	0.841	1.433	0.621	1.381	0.788	0.502	0.45	1.056	0.308	1.322	0.526	0.566	1.639	0.817	0.823	0.85	0.58	0.651	0.501	0.413	0.531	0.44	0.505	0.73	0.507	1.084	1.693	0.79	0.706	0.563	1.029	0.512
266.901	0.389	0.581	1.282	1.405	0.444	0.696	0.587	0.622	0.643	1.581	1.043	1.152	1.214	1.163	0.617	1.99	0.877	0.831	1.596	0.568	1.713	0.617	0.53	0.494	1.14	0.286	1.524	0.517	0.599	1.725	0.972	0.848	0.848	0.561	0.66	0.498	0.39	0.557	0.414	0.475	0.841	0.498	1.049	1.58	0.847	0.705	0.638	1.195	0.529
269.304	0.593	0.732	1.616	1.662	0.524	0.816	0.898	0.835	0.795	2.016	1.18	1.204	1.758	1.437	0.707	2.338	1.439	0.92	1.626	0.836	2.07	0.795	0.621	0.595	1.528	0.431	1.662	0.591	0.674	2.11	1.004	1.021	1.018	0.653	0.794	0.679	0.557	0.634	0.464	0.553	0.898	0.591	1.228	1.844	1.251	0.892	0.835	1.571	0.582
271.833	0.503	0.656	1.315	1.484	0.429	0.779	0.671	0.78	0.762	1.975	1.259	1.106	1.592	1.355	0.672	1.989	0.946	0.817	1.437	0.605	1.725	0.72	0.598	0.476	1.122	0.308	1.879	0.571	0.625	1.898	1.026	0.89	0.922	0.602	0.759	0.568	0.441	0.625	0.437	0.522	0.767	0.497	1.196	1.69	1.118	0.8	0.637	1.023	0.561
274.317	0.712	0.912	1.483	1.846	0.519	0.894	0.959	0.881	0.922	1.968	1.421	1.208	1.771	1.523	0.805	2.426	1.121	0.975	1.743	0.891	1.948	0.868	0.703	0.629	1.21	0.415	1.954	0.636	0.714	2.371	1.286	1.124	1.211	0.765	0.896	0.78	0.564	0.718	0.495	0.571	0.982	0.556	1.302	1.932	1.694	0.98	0.794	1.436	0.627
276.783	0.608	0.966	1.29	1.465	0.505	0.855	0.833	0.744	0.838	2.222	1.162	1.099	1.633	1.469	0.732	2.202	0.967	0.83	1.402	0.767	1.704	0.751	0.576	0.524	1.176	0.31	2.067	0.533	0.686	2.049	1.054	0.933	1.007	0.664	0.823	0.586	0.389	0.686	0.428	0.504	0.9	0.54	1.131	1.734	1.526	0.878	0.582	1.335	0.59
279.186	0.612	1.214	1.122	1.504	0.52	0.835	0.831	0.912	0.893	2.09	1.286	1.15	1.517	1.587	0.791	2.318	0.795	0.86	1.217	0.873	1.895	0.813	0.622	0.501	0.97	0.366	2.23	0.563	0.712	2.152	1.136	0.991	1.084	0.755	0.96	0.643	0.408	0.672	0.455	0.544	0.956	0.559	1.227	1.847	1.576	0.985	0.665	1.43	0.602
281.643	0.829	1.597	1.197	1.787	0.646	1.042	1.1	1.23	1.023	2.513	1.629	1.185	1.568	1.933	0.908	2.351	1.25	1.102	1.614	0.979	2.121	0.852	0.749	0.653	0.948	0.451	2.409	0.673	0.829	2.309	1.302	1.236	1.357	0.922	1.193	0.753	0.558	0.831	0.491	0.632	1.213	0.665	1.397	1.884	2.204	1.12	0.815	1.587	0.695
284.056	0.879	1.741	1.054	1.578	0.633	1.158	1.188	1.383	1.02	2.446	1.433	1.145	1.843	1.962	0.986	2.229	0.94	1.105	1.687	1.197	1.733	0.876	0.857	0.666	1.143	0.497	2.467	0.697	0.819	2.44	1.394	1.332	1.415	1.003	1.291	0.823	0.609	0.859	0.505	0.672	1.247	0.666	1.549	2.186	2.129	1.294	0.832	1.534	0.714
286.477	0.627	1.441	1.147	1.46	0.529	0.96	0.837	1.151	0.866	2.231	1.31	1.136	1.713	1.61	0.836	2.271	1.017	0.859	1.715	0.889	1.986	0.642	0.653	0.546	1.291	0.358	2.287	0.575	0.704	1.904	1.041	1.084	1.113	0.824	1.007	0.6	0.486	0.76	0.45	0.567	0.904	0.565	1.249	1.814	1.71	1.09	0.614	1.353	0.67
288.997	1.013	1.996	1.446	1.765	0.611	1.213	1.304	1.376	1.022	2.43	1.577	1.475	1.74	1.951	0.952	2.567	1.224	1.058	2.064	1.127	1.808	0.867	0.856	0.643	1.53	0.417	2.685	0.662	0.821	2.261	1.199	1.43	1.458	0.968	1.226	0.605	0.612	0.931	0.505	0.668	1.14	0.694	1.568	2.5	2.098	1.305	0.75	1.661	0.771
291.463	0.855	2.072	0.827	1.221	0.564	1.323	1.075	1.611	1.061	2.447	1.444	1.131	1.013	2.51	1.032	1.967	0.767	1.004	1.465	1.228	1.609	0.764	0.884	0.618	0.515	0.378	2.621	0.692	0.911	2.374	1.288	1.35	1.422	0.899	1.388	0.727	0.566	1.029	0.505	0.675	1.234	0.688	1.214	1.577	1.88	1.286	0.737	1.391	0.828
293.929	0.917	1.961	0.611	1.021	0.605	1.303	1	1.609	1.047	2.459	1.039	1.068	1.646	2.62	1.148	2.081	0.579	1.143	1.213	1.127	1.711	0.783	0.876	0.566	0.811	0.369	2.674	0.672	0.957	2.499	1.363	1.529	1.392	0.966	1.468	0.822	0.502	1.109	0.512	0.693	1.233	0.712	1.119	1.625	1.956	1.191	0.727	1.319	0.902
296.395	0.837	2.018	0.805	1.325	0.594	1.325	1.011	1.26	1.091	2.327	1.455	1.142	1.568	2.34	1.094	2.136	0.959	1.117	1.405	1.137	1.92	0.786	0.847	0.541	1.217	0.403	2.653	0.64	0.868	2.24	1.067	1.435	1.438	0.896	1.436	0.891	0.474	1.132	0.496	0.686	1.203	0.672	1.28	1.51	2.143	1.163	0.653	1.421	0.855
298.852	1.068	2.334	1.173	1.597	0.706	1.547	1.289	1.724	1.276	2.824	1.667	1.486	1.564	2.824	1.34	2.304	1.051	1.337	1.742	1.576	2.086	0.939	1.017	0.662	1.576	0.518	2.858	0.723	0.996	2.445	1.248	1.749	1.61	1.084	1.664	0.994	0.671	1.376	0.549	0.758	1.396	0.769	1.479	2.119	2.362	1.33	0.739	1.998	0.998
301.3	1.124	2.222	1.398	1.743	0.699	1.657	1.221	1.608	1.308	2.559	1.443	1.384	1.827	2.756	1.491	2.597	0.87	1.358	1.433	1.614	2.132	1.015	0.981	0.66	1.347	0.526	2.849	0.698	1.051	2.641	1.39	1.818	1.661	1.218	1.666	1.099	0.694	1.474	0.572	0.801	1.681	0.8	1.691	2.635	2.373	1.31	0.817	1.69	1.043
303.821	0.942	2.008	0.715	1.343	0.675	1.401	1.026	1.62	1.373	2.805	1.4	1.197	1.338	2.629	1.492	2.067	0.907	1.196	1.275	1.328	1.86	0.788	0.978	0.559	1.265	0.426	2.642	0.691	1.024	2.361	1.281	1.687	1.566	1.204	1.699	0.992	0.518	1.432	0.562	0.777	1.435	0.745	1.283	2.032	2.229	1.228	0.623	1.494	0.989
306.287	1.266	2.606	1.124	1.556	0.777	1.693	1.179	1.869	1.533	2.598	1.606	1.473	1.671	2.928	1.593	2.466	1.037	1.449	1.617	1.483	1.793	0.883	1.157	0.689	1.281	0.52	3.421	0.76	1.265	2.697	1.53	2.159	1.67	1.437	1.823	1.24	0.664	1.703	0.611	0.886	1.849	0.896	1.48	2.205	2.575	1.484	0.804	1.635	1.162
308.753	1.185	2.608	1.097	1.272	0.747	1.861	1.139	1.921	1.597	2.86	1.221	1.451	1.539	3.218	1.792	2.599	0.858	1.482	1.641	1.538	2.169	0.975	1.263	0.658	1.48	0.573	2.986	0.756	1.279	2.402	1.576	2.233	1.607	1.535	2.063	1.386	0.667	1.771	0.628	0.883	1.8	0.945	1.648	2.253	2.541	1.599	0.865	1.627	1.203
311.174	1.316	2.662	1.125	1.387	0.816	1.819	1.189	2.036	1.493	2.796	1.251	1.61	1.58	3.076	1.851	2.331	0.93	1.408	1.585	1.651	2.01	1.057	1.344	0.651	1.519	0.687	3.046	0.819	1.293	2.556	1.709	2.554	1.796	1.765	2.03	1.201	0.622	1.709	0.631	0.884	2.002	1.039	1.561	1.906	2.312	1.479	0.965	1.756	1.22
313.676	1.122	2.177	0.935	1.292	0.71	1.66	1.001	1.841	1.79	2.553	1.149	1.107	1.218	2.659	1.753	2.09	0.869	1.357	1.664	1.415	1.92	0.907	1.129	0.624	1.171	0.514	2.805	0.721	1.307	2.066	1.547	2.274	1.675	1.604	2	1.007	0.514	1.574	0.586	0.791	1.716	0.904	1.271	1.839	2.032	1.276	0.623	1.516	1.159
316.106	1.31	2.385	0.997	1.427	0.849	1.979	1.213	2.287	1.787	2.865	1.421	1.241	1.479	3.076	2.158	2.545	0.777	1.531	1.786	1.632	1.64	0.968	1.303	0.708	1.353	0.63	2.865	0.797	1.388	2.609	1.666	2.487	1.771	1.965	2.334	1.276	0.618	1.742	0.673	0.891	2.057	1.166	1.411	2.143	2.217	1.582	0.882	1.797	1.327
318.626	1.209	2.288	0.907	1.014	0.829	1.885	0.915	1.738	1.687	2.265	1.121	1.11	1.667	2.707	2.077	1.902	0.651	1.288	1.429	1.39	1.586	0.826	1.189	0.565	1.11	0.553	2.702	0.761	1.285	2.229	1.649	2.367	1.78	1.756	2.109	1.101	0.624	1.737	0.635	0.803	1.815	1.103	1.169	1.826	2.045	1.452	0.764	1.544	1.324
321.012	1.364	2.642	0.919	1.33	1	2.05	0.943	2.08	1.865	2.817	1.265	1.327	1.686	2.99	2.61	2.125	0.914	1.578	1.653	1.259	1.854	0.971	1.363	0.774	1.116	0.647	3.232	0.889	1.484	2.631	2.04	2.852	2.076	2.196	2.332	1.454	0.635	1.882	0.728	0.91	1.924	1.266	1.233	2.05	2.483	1.735	0.961	1.903	1.437
323.478	1.222	2.643	0.762	1.178	0.773	1.816	0.953	1.903	1.993	2.469	1.046	1.068	1.138	2.949	2.368	1.837	0.609	1.371	1.305	1.401	1.512	0.826	1.335	0.715	1.219	0.553	2.903	0.823	1.472	2.62	1.62	2.542	1.722	1.945	2.261	1.038	0.535	1.824	0.682	0.8	1.797	1.146	0.888	1.742	2.04	1.404	0.741	1.638	1.389
325.944	1.367	2.97	0.909	1.223	0.953	2.079	0.914	2.1	2.127	2.869	1.147	1.245	1.481	2.993	2.739	2.122	0.929	1.723	1.626	1.617	1.777	0.953	1.523	0.843	1.508	0.642	3.046	0.9	1.667	2.694	1.937	2.869	2.022	2.208	2.369	1.334	0.67	2.168	0.781	0.919	2.022	1.35	1.287	1.608	2.442	1.793	0.994	1.772	1.649
328.401	1.458	2.5	0.748	1.152	1.012	2.114	0.883	2.107	2.136	2.764	1.063	1.313	1.259	3.001	2.758	2.361	0.69	1.736	1.373	1.369	1.62	0.983	1.493	0.889	1.026	0.766	3.121	0.943	1.834	2.592	2.091	2.84	2.089	2.327	2.546	1.512	0.691	2.186	0.778	0.998	2.196	1.353	1.101	2.276	2.565	1.883	1.032	1.606	1.717
330.867	1.378	2.588	1.307	1.52	1.035	2.081	0.751	2.275	1.972	3.049	1.477	1.332	1.367	3.387	2.568	2.261	0.977	1.773	1.521	1.652	1.42	1	1.579	0.805	1.478	0.75	3.367	0.945	1.77	2.704	2.221	2.783	2.008	2.481	2.281	1.646	0.741	2.203	0.799	0.945	2.137	1.427	1.275	2.133	2.669	1.892	1.184	1.476	1.759
333.441	1.387	2.776	0.569	1.285	1.052	2.176	0.826	2.547	2.098	2.68	1.426	1.469	1.554	2.94	2.582	2.215	0.92	1.761	1.555	1.504	1.827	0.89	1.47	0.837	1.018	0.797	3.156	0.983	1.759	2.89	1.962	2.912	1.864	2.457	2.546	1.581	0.636	2.469	0.836	0.979	1.984	1.57	1.218	1.887	2.595	2.064	1.28	1.413	1.842
335.916	1.037	2.556	0.763	0.984	0.974	1.917	0.836	1.893	2.045	2.171	0.849	1.266	1.337	2.836	2.44	1.886	0.831	1.707	1.308	1.359	1.978	0.802	1.347	0.714	1.111	0.588	2.99	0.837	1.603	2.404	1.948	2.518	1.771	2.2	2.365	1.389	0.51	2.187	0.751	0.864	1.856	1.405	1.035	1.714	2.125	1.81	1.046	1.432	1.849
338.383	1.425	2.724	1.048	1.252	1.155	2.211	0.715	2.303	2.337	2.474	1.55	1.262	1.648	3.089	2.507	1.676	0.784	1.874	1.248	1.393	1.571	0.964	1.55	0.955	0.942	0.678	3.294	1.019	1.844	2.876	2.289	2.741	1.81	2.451	2.447	1.946	0.609	2.42	0.85	1.062	2.063	1.541	1.249	2.089	2.2	1.921	1.188	1.679	2.149
340.804	1.296	2.755	0.753	1.077	1.115	2.167	0.893	2.186	1.953	2.354	1.169	1.177	1.22	3.08	2.477	1.806	0.698	1.738	1.556	1.383	1.397	1.021	1.53	0.853	0.998	0.837	3.061	1.007	1.904	3	2.035	2.771	1.906	2.507	2.658	1.648	0.678	2.677	0.84	1.031	1.851	1.675	0.933	1.752	2.594	2.066	1.295	1.651	2.169
343.333	1.43	2.936	0.862	1.084	1.144	2.107	0.951	2.385	2.125	2.819	0.965	1.273	1.203	2.89	2.675	2.204	0.662	1.64	1.594	1.379	1.556	0.858	1.526	0.833	1.267	0.804	2.866	1.099	1.776	2.945	2.146	3.081	2.174	2.362	2.709	1.872	0.726	2.593	0.86	0.981	2.118	1.862	1.049	1.566	2.354	2.134	1.371	1.293	2.238
345.736	1.353	2.346	0.516	1.109	1.181	2.312	0.79	1.861	2.462	2.744	1.355	1.342	1.313	3.056	2.546	1.724	0.495	1.898	1.211	1.273	1.231	0.939	1.64	0.84	0.773	0.893	3.167	1.092	1.951	2.862	1.936	3.135	1.946	2.504	2.53	1.438	0.665	2.851	0.903	1.033	2.047	2.219	0.696	1.885	2.169	2.088	1.388	1.616	2.519
348.265	1.388	2.72	1.148	1.421	1.112	2.084	0.962	2.257	2.123	2.792	1.383	1.242	1.689	3.111	2.26	2.146	0.807	1.732	1.419	1.431	1.008	0.791	1.447	0.798	1.235	0.816	3.038	1.047	1.667	2.858	1.897	2.956	1.904	2.551	2.785	1.275	0.629	2.362	0.822	0.906	2.174	1.781	1.385	2.09	2.22	2.07	1.133	1.591	2.085
350.749	1.1	2.622	1.256	1.448	1.023	1.97	1.087	1.858	2.103	2.719	1.403	1.149	1.611	3.052	1.91	2.35	0.927	1.523	1.468	1.765	1.543	0.721	1.26	0.737	1.081	0.743	2.989	0.924	1.579	2.377	1.83	2.673	1.854	2.182	2.504	1.224	0.499	2.095	0.767	0.818	1.931	1.777	1.454	2.234	2.101	2.049	1.09	1.519	1.899
353.233	1.414	2.836	0.786	1.189	1.362	2.315	0.95	2.125	2.507	2.658	1.375	1.463	1.409	3.173	2.339	1.914	0.7	1.799	1.65	1.753	1.728	0.973	1.54	0.906	1.076	0.992	3.276	1.102	1.904	2.747	2.083	3.054	2.033	2.632	2.899	1.635	0.634	2.526	0.886	1.082	2.269	2.001	0.981	2.036	2.454	2.309	1.37	1.678	2.3
355.691	1.297	2.642	0.677	1.274	1.297	2.091	0.764	2.058	2.207	2.567	1.142	1.034	1.012	3.182	2.09	1.881	0.632	1.684	1.323	1.365	1.775	0.859	1.422	0.806	0.729	0.779	2.786	1.014	1.777	2.825	1.859	2.77	1.861	2.266	2.736	1.217	0.586	2.602	0.845	1.079	1.959	1.944	1.013	1.844	2.35	2.152	1.146	1.254	2.34
358.157	1.391	2.997	0.858	1.584	1.28	2.274	0.996	2.404	2.57	2.743	1.407	1.327	1.352	3.413	2.373	2.094	0.938	2.131	1.269	1.659	1.49	1.032	1.464	0.918	1.569	1.064	3.233	1.144	2.051	3.103	1.956	3.095	2.222	2.53	3.072	1.555	0.701	2.491	0.973	1.146	2.296	2.411	1.083	1.802	2.488	2.507	1.507	1.606	2.355
360.605	1.12	2.569	1.171	1.709	1.172	1.973	1.023	2.13	2.116	2.79	1.498	1.178	1.743	3.072	1.858	2.217	0.942	1.671	1.58	1.658	1.834	0.803	1.195	0.78	1.362	0.835	2.714	1.031	1.574	2.417	1.859	2.881	1.875	2.285	2.742	1.083	0.486	2.347	0.864	0.988	1.842	1.82	1.355	2.229	2.439	2.297	1.025	1.537	2.09
363.071	1.507	2.489	0.894	1.317	1.365	2.383	0.98	2.115	2.75	2.848	1.175	1.267	1.371	3.086	2.419	2.367	0.566	2.101	1.226	1.431	1.84	0.903	1.466	0.937	1.177	1.009	3.012	1.287	2.011	3.003	2.133	3.097	2.127	2.521	2.93	1.561	0.765	2.661	1.04	1.405	2.041	2.378	1.094	1.804	2.292	2.332	1.428	1.517	2.6
365.51	1.292	2.672	0.552	1.168	1.329	2.217	0.766	1.883	2.476	2.294	0.804	1.174	0.942	3.508	2.164	2.015	0.604	1.66	1.105	1.124	1.294	0.81	1.39	0.806	0.795	0.929	3.128	1.22	1.922	2.537	1.944	2.529	1.791	2.382	2.775	1.251	0.548	2.554	0.987	1.255	1.922	2.092	1.068	1.585	2.303	1.784	1.015	1.393	2.536
368.03	1.368	2.762	0.962	1.252	1.42	2.323	1.072	2.23	2.537	2.509	1.203	1.177	1.34	2.92	2.374	1.682	0.593	1.778	0.986	1.695	2.001	1.106	1.588	0.938	1.044	1.081	3.097	1.407	2.143	3.196	1.848	2.828	2.11	2.541	3.046	1.56	0.677	3.05	1.114	1.451	2.226	2.559	1.189	2.044	2.59	2.27	1.321	1.638	2.517
370.505	1.183	2.535	0.872	0.969	1.312	2.22	0.882	1.882	2.34	2.569	1.126	1.142	0.788	2.957	2.197	1.932	0.495	1.887	1.042	1.234	1.352	0.99	1.487	0.827	0.971	0.957	2.826	1.286	2.107	3.002	1.918	2.715	1.814	2.51	2.684	1.28	0.596	2.7	1.061	1.485	2.186	2.333	1.019	1.553	1.822	2.092	1.162	1.449	2.463
372.981	1.201	2.719	0.979	1.31	1.127	2.074	1.028	2.147	2.178	2.674	1.442	1.134	1.88	3.199	1.92	2.295	0.854	1.807	1.266	1.506	1.701	0.946	1.287	0.747	1.326	0.862	2.942	1.254	1.774	2.621	1.858	2.847	1.82	2.036	2.758	1.167	0.571	2.497	0.997	1.287	2.144	2.018	1.25	2.239	2.134	2.122	1.149	1.674	2.196
375.465	1.218	2.291	0.375	0.768	1.563	2.463	0.685	2.063	2.718	1.996	0.603	0.95	1.019	2.856	2.286	1.604	0.44	1.807	0.629	1.164	1.063	0.954	1.363	0.846	0.834	1.012	2.984	1.488	2.141	2.681	1.438	2.624	1.857	2.195	2.931	1.19	0.598	3.126	1.211	1.658	1.847	2.299	0.885	1.494	2.128	2.166	1.271	1.201	2.623
377.931	1.498	2.233	0.49	1.092	1.517	2.375	0.955	1.931	2.933	2.831	1.245	1.318	1.316	3.173	2.462	2.006	0.69	2.223	0.998	1.418	0.863	0.991	1.542	0.932	0.798	1.158	2.845	1.604	2.206	3.209	1.876	2.866	2.134	2.552	3.425	1.598	0.658	3.011	1.214	1.636	2.224	2.461	1.173	1.802	1.571	2.102	1.428	1.752	2.756
380.415	1.174	2.076	0.805	1.291	1.316	2.053	0.83	1.848	2.375	2.469	1.013	1.226	1.284	3.176	2.333	1.678	0.462	1.976	1.229	1.354	1.192	0.941	1.548	0.803	0.767	1.041	3.051	1.491	2.042	2.861	1.508	2.431	1.826	2.223	2.92	1.04	0.536	2.963	1.213	1.404	1.952	2.582	1.161	2.284	2.274	1.966	1.125	1.569	2.249
382.881	1.295	2.705	0.739	0.968	1.378	2.269	0.844	1.803	2.457	2.541	1.011	1.074	1.327	2.997	2.475	2.112	0.348	1.915	1.233	0.947	1.109	0.972	1.601	0.873	0.835	1.155	3.115	1.738	2.092	3.028	1.688	2.636	1.791	2.563	3.015	1.45	0.607	3.075	1.306	1.527	2.114	2.514	1.157	1.923	2.268	2.155	1.384	1.576	2.487
385.365	1.384	2.747	0.959	1.497	1.462	2.14	1.075	2.167	2.112	2.949	1.4	1.266	1.51	3.036	2.243	2.154	0.921	1.953	1.48	1.657	1.946	1.013	1.344	0.773	1.448	1.069	2.907	1.575	1.841	2.753	1.933	2.793	1.819	2.303	2.876	1.256	0.589	2.971	1.205	1.254	2.281	2.512	1.455	2.097	2.352	2.542	1.33	1.591	2.192
387.786	1.577	2.81	0.987	1.25	1.509	2.244	1.096	2.107	2.628	2.593	1.486	1.274	1.496	3.089	2.449	2.131	0.861	1.835	1.409	1.353	1.59	1.111	1.495	0.897	1.189	1.106	3.23	1.773	2.132	2.956	2.186	3.175	2.03	2.54	3.07	1.336	0.585	3.09	1.278	1.458	2.38	2.876	1.386	2.197	2.27	2.233	1.476	1.567	2.331
390.271	1.228	2.724	1.261	1.418	1.298	2.159	1.143	2.368	2.218	2.658	1.425	1.384	1.693	3.066	2.264	2.478	0.946	1.871	1.268	1.533	2.027	0.989	1.345	0.809	1.198	1.012	3.065	1.678	1.929	2.667	2.064	2.812	2.018	2.453	2.843	0.983	0.541	2.882	1.157	1.356	2.302	2.608	1.418	2.062	2.194	2.299	1.143	1.695	2.314
392.701	1.643	2.346	0.917	0.894	1.618	2.335	0.939	2.3	2.71	3.008	0.955	1.248	0.86	3.01	2.613	1.908	0.897	2.194	1.338	1.397	1.364	1.127	1.618	0.938	0.736	1.352	3.297	1.933	2.262	3.027	2.098	3.07	2.109	2.517	3.419	1.452	0.681	3.341	1.422	1.522	2.413	2.846	1.339	1.833	2.481	2.587	1.374	1.713	2.547
395.14	1.631	3.057	1.418	1.599	1.436	2.241	1.412	2.369	2.586	2.801	1.813	1.582	1.934	3.721	2.436	2.73	1.147	2.271	1.833	1.652	2.028	1.018	1.472	0.841	1.913	1.128	3.344	1.781	1.852	2.999	2.77	2.957	2.101	2.766	3.168	1.19	0.663	3.22	1.165	1.232	2.208	2.615	1.704	2.281	2.605	2.467	1.341	1.971	2.19
397.669	1.645	3.128	1.36	1.78	1.352	2.151	1.325	2.221	2.476	3.029	1.86	1.362	2.337	3.341	2.461	2.339	1.167	2.097	1.849	1.449	2.08	1.304	1.454	0.863	1.768	1.149	3.261	1.788	2.085	2.951	2.211	2.817	1.991	2.657	3.071	1.411	0.597	3.236	1.221	1.353	2.221	2.82	1.711	2.347	2.53	2.519	1.414	1.653	2.116
400.171	1.249	2.423	0.794	0.993	1.324	2.163	0.985	2.297	2.501	2.755	1.084	1.147	0.93	3.027	2.559	2.106	0.718	2.097	1.087	1.483	1.219	0.804	1.496	0.788	1.127	0.887	2.897	1.905	2.128	2.863	1.603	2.432	1.859	2.534	3.018	1.222	0.53	3.141	1.293	1.467	2.078	2.906	1.161	2.101	2.007	2.254	1.323	1.286	2.125
402.61	1.161	2.454	0.891	1.236	1.277	1.893	0.879	2.066	2.294	2.64	1.328	1.194	1.022	2.84	2.302	2.087	0.86	1.614	0.897	1.563	1.448	0.882	1.24	0.748	0.919	0.887	3.124	1.766	2.083	2.719	1.851	2.856	1.913	2.437	2.806	1.067	0.425	2.972	1.257	1.238	1.96	2.642	1.34	1.997	2.208	2.162	1.242	1.327	1.904
405.094	1.336	2.598	1.274	1.415	1.279	1.901	1.066	2.296	2.369	2.782	1.226	1.218	1.503	3.319	2.411	2.171	1.034	1.859	1.347	1.361	2.021	0.906	1.254	0.771	1.282	0.928	2.585	1.682	1.792	2.759	1.73	2.688	1.876	2.141	2.719	0.927	0.511	2.616	1.268	1.346	2.136	2.42	1.307	2.038	2.065	2.225	1.353	1.689	2.06
407.579	1.326	2.297	0.983	1.132	1.313	1.878	0.864	2.196	2.432	2.902	1.123	1.126	1.032	3.276	2.512	2.192	0.751	1.864	1.274	1.489	1.008	1	1.421	0.834	0.994	1.101	3.162	1.865	2.354	3.015	1.598	2.776	1.82	2.282	2.854	1.316	0.575	3.165	1.35	1.425	2.02	2.762	1.037	1.493	2.22	2.093	1.595	1.134	2.522
410.045	1.156	2.026	0.789	0.827	1.433	2.075	0.815	2.219	2.607	2.329	0.827	1.09	1.333	2.875	2.52	1.928	0.7	1.872	1.295	1.262	1.361	0.856	1.515	0.919	0.925	1.009	2.993	1.906	2.282	2.871	1.702	2.522	1.69	2.342	2.985	1.089	0.469	3.289	1.371	1.535	1.965	2.587	0.92	2.02	1.941	2.097	1.493	1.277	2.467
412.511	1.453	2.545	1.031	1.235	1.422	2.015	0.809	2.109	2.485	2.558	1.232	1.25	1.264	3.074	2.56	2.132	0.729	1.933	1.304	1.489	1.287	1.149	1.527	0.92	0.684	1.07	3.173	2.023	2.393	2.85	1.758	2.769	1.804	2.507	2.727	1.073	0.539	2.805	1.246	1.668	1.964	2.538	1.165	2.039	2.322	2.174	1.539	1.471	2.41
415.058	1.276	2.322	0.907	1.322	1.441	1.894	0.837	2.101	2.449	2.501	0.989	1.127	1.44	3.172	2.558	1.64	0.573	1.906	1.248	1.301	1.265	1.064	1.455	0.89	0.943	0.965	2.983	2.021	2.381	2.762	2.035	2.772	1.918	2.277	2.799	1.235	0.594	2.961	1.38	1.553	1.999	2.669	1.14	1.644	2.009	1.99	1.415	0.974	2.371
417.578	1.205	2.773	1.459	1.672	1.247	1.952	1.225	2.324	2.487	2.836	1.548	1.144	1.926	3.239	2.41	2.371	1.225	1.959	1.838	1.636	2.373	1.223	1.362	0.942	1.558	1.15	3.229	2.043	2.415	2.972	2.095	2.985	1.884	2.591	2.864	1.202	0.592	2.806	1.218	1.451	2.55	2.547	1.552	2.262	2.288	2.103	1.652	1.887	2.336
420.008	1.271	2.817	1.427	1.756	1.313	1.859	1.269	2.507	2.341	3.314	1.656	1.342	1.959	3.473	2.485	2.448	1.213	1.889	1.997	1.844	1.734	1.102	1.28	0.924	1.971	1.221	3.331	2.055	2.343	3.102	2.275	3.016	1.96	2.698	2.581	1.086	0.638	2.802	1.254	1.429	2.301	2.291	1.565	2.25	2.17	2.386	1.616	1.776	2.149
422.51	1.35	3.179	1.469	1.399	1.532	1.999	1.198	2.035	2.398	2.899	1.479	1.45	2.051	3.579	2.462	2.421	1.122	1.897	1.566	1.713	1.783	1.119	1.398	1.009	1.313	1.209	3.412	2.273	2.49	3.139	2.053	3.079	2.089	2.805	2.909	1.174	0.619	3.065	1.23	1.553	2.299	2.814	1.372	2.29	2.464	2.279	1.754	1.778	2.34
424.95	1.261	2.738	1.532	1.622	1.23	1.798	1.306	2.266	2.433	2.888	1.415	1.707	1.744	3.425	2.429	2.562	1.182	1.966	1.851	1.522	2.369	1.168	1.214	0.878	1.442	1.033	3.24	2.096	2.111	2.891	2.414	2.745	1.805	2.507	2.407	1.025	0.659	2.704	1.151	1.317	2.388	2.446	1.684	2.323	2.147	2.183	1.59	1.898	2.027
427.461	1.163	2.297	1.07	1.109	1.355	1.774	0.982	2.424	2.469	2.376	1.085	1.175	1.23	3.153	2.687	2.023	0.688	1.646	0.905	1.34	1.691	1.083	1.275	0.848	0.835	1.167	2.878	2.121	2.48	2.995	1.653	2.736	2.066	2.309	2.64	1.156	0.598	3.027	1.319	1.502	1.999	2.317	1.014	2.032	2.274	2	1.505	1.32	2.687
429.9	1.223	2.467	1.129	1.304	1.379	1.756	1.072	2.155	2.547	2.71	1.05	1.146	1.614	2.993	2.839	1.939	0.667	1.918	1.143	1.6	1.787	1.179	1.218	0.821	0.846	1.129	3.214	2.142	2.301	2.583	1.936	2.643	1.872	2.289	2.688	1.137	0.584	3.045	1.319	1.451	2.121	2.197	1.104	2.151	2.229	2.015	1.414	1.38	2.462
432.33	1.077	2.667	1.035	1.041	1.488	1.859	0.942	1.958	2.318	2.549	1.087	1.183	1.468	3.049	2.807	1.888	0.625	1.858	1.199	1.208	1.533	1.043	1.187	0.843	0.795	1.079	3.054	1.974	2.497	2.836	1.788	2.787	1.897	2.473	2.69	1.033	0.564	3.152	1.333	1.513	1.869	2.287	1.319	1.933	1.888	1.836	1.585	1.325	2.193
434.832	1.117	2.712	1.304	1.587	1.252	1.571	1.122	2.056	2.001	2.513	1.417	1.349	1.827	2.913	2.425	2.448	1.041	1.745	1.375	1.668	1.812	1.216	1.035	0.689	1.473	1.219	3.156	1.703	2.153	2.696	2.258	2.703	1.904	2.357	2.377	0.981	0.531	2.663	1.135	1.404	1.96	1.929	1.445	2.051	1.73	1.838	1.416	1.541	1.944
437.316	0.985	2.673	1.081	1.15	1.337	1.783	1.026	1.981	2.185	2.584	1.367	1.159	1.388	3.073	2.674	1.48	0.673	1.846	1.222	1.55	1.482	1.09	1.164	0.804	0.927	1.296	3.156	2.059	2.264	2.796	1.721	2.565	1.921	2.193	2.405	0.872	0.592	2.819	1.354	1.761	1.957	2.231	0.866	1.939	1.852	1.895	1.462	1.382	1.99
439.8	1.016	2.568	1.322	1.572	1.223	1.615	1.113	2.256	1.945	2.696	1.603	1.235	1.847	3.033	2.745	2.367	0.939	1.557	1.481	1.562	1.992	1.171	1.12	0.746	1.318	1.19	3.191	1.855	2.058	2.776	1.924	2.669	2.028	2.214	2.445	0.796	0.603	2.633	1.217	1.457	1.872	2.049	1.506	2.207	1.7	1.544	1.39	1.524	1.844
442.285	1.164	2.469	1.257	1.647	1.4	1.634	1.161	2.189	2.269	2.894	1.39	1.333	1.818	3.347	2.879	2.535	1.119	1.823	1.569	1.523	2.188	1.272	1.309	0.816	1.093	1.205	3.222	2.08	2.249	3.07	2.004	2.858	2.024	2.318	2.6	0.923	0.703	2.958	1.31	1.704	2.295	2.351	1.551	2.123	1.942	1.774	1.792	1.681	1.921
444.706	1.179	2.665	1.438	1.862	1.213	1.636	1.274	2.106	2.14	2.824	1.477	1.463	1.928	3.201	2.504	2.134	1.194	1.859	1.802	1.448	2.073	1.227	1.149	0.752	1.631	1.128	3.145	1.899	2.013	2.688	2.264	2.982	1.96	2.715	2.356	1.017	0.663	2.43	1.227	1.377	2.113	2.084	1.474	2.398	1.772	1.687	1.504	1.555	1.802
447.199	1.285	2.488	1.33	1.195	1.661	1.895	1.153	2.477	2.192	2.642	1.128	1.387	1.631	2.965	2.926	2.1	0.84	1.928	1.353	1.498	1.747	1.358	1.476	0.969	0.962	1.382	3.183	2.317	2.491	3.314	1.956	2.797	2.095	2.705	2.787	1.144	0.728	3.261	1.464	1.803	2.043	2.342	0.964	1.881	1.857	1.72	1.721	1.58	2.46
449.701	1.04	2.621	1.141	1.566	1.299	1.619	0.839	2.241	2.415	2.553	1.001	1.125	1.256	2.871	2.603	1.934	0.71	1.689	1.347	1.209	1.721	1.156	1.215	0.717	1.138	1.008	3.056	1.962	2.06	2.83	1.764	2.85	1.768	2.412	2.553	1.051	0.583	2.624	1.393	1.461	1.91	2.194	0.988	1.786	1.468	1.577	1.448	1.274	2.106
452.266	1.128	2.625	1.281	1.505	1.267	1.562	0.992	2.046	2.068	2.675	1.328	1.237	1.743	3.429	2.556	1.817	0.752	1.487	1.293	1.414	1.376	1.17	1.368	0.74	1.017	1.133	3.079	2.058	2.029	3.042	1.983	2.722	2.105	2.225	2.534	0.961	0.606	2.602	1.392	1.499	1.74	2.254	1.228	2.096	1.446	1.442	1.421	1.469	2.049
454.687	1.017	2.591	1.332	1.327	1.286	1.551	1.021	2.101	2.139	2.922	1.37	1.074	1.667	3.073	2.735	2.227	0.828	1.755	1.639	1.434	1.363	1.158	1.226	0.833	1.043	1.045	3.047	2.055	1.981	3.256	1.946	2.837	1.744	2.605	2.533	1.064	0.6	2.509	1.524	1.532	2.049	2.164	1.243	1.705	1.522	1.336	1.36	1.458	2.023
457.234	1.082	2.373	1.228	1.415	1.214	1.602	1.02	1.873	2.118	2.469	1.322	1.225	1.766	3.24	2.556	1.899	0.811	1.781	1.226	1.476	1.853	1.248	1.194	0.773	1.105	0.98	3.132	2.156	1.849	2.648	1.915	2.677	1.893	2.483	2.5	1.091	0.644	2.38	1.414	1.711	2.141	2.144	1.169	2.022	1.492	1.368	1.501	1.519	2.077
459.8	0.945	2.266	1.379	1.651	1.236	1.449	1.08	2.161	1.845	2.725	1.398	1.303	2.052	2.799	2.302	2.317	0.928	1.737	1.541	1.5	1.797	1.085	0.982	0.727	1.206	0.899	2.924	1.826	1.692	2.7	2.285	2.485	1.781	2.394	2.021	1.002	0.571	1.962	1.3	1.36	2.146	2.063	1.703	2.487	1.254	1.235	1.255	1.636	1.7
462.302	0.952	2.213	1.223	1.599	1.439	1.645	1.015	2.344	1.997	2.544	1.174	1.234	1.446	2.819	2.58	2.357	0.683	1.804	1.277	1.438	1.548	1.29	1.127	0.775	1.16	0.957	3.122	2.086	1.865	2.8	2.02	2.756	1.864	2.421	2.406	0.951	0.685	2.31	1.399	1.568	2.135	2.175	1.454	2.126	1.319	1.431	1.203	1.303	1.998
464.75	1.023	2.469	1.43	1.684	1.425	1.543	1.097	2.476	1.99	2.432	1.333	1.175	1.856	3.153	2.123	2	0.88	1.74	1.479	1.575	1.81	1.248	1.19	0.867	0.943	0.881	3.21	1.931	1.584	2.944	2.059	2.555	2.126	2.363	2.359	1.062	0.669	2.222	1.408	1.593	1.846	2.295	1.372	2.064	1.292	1.501	1.324	1.565	1.977
467.252	0.979	2.18	1.186	1.699	1.44	1.646	1.116	1.973	1.847	2.649	1.144	1.222	1.633	3.155	2.291	1.954	0.905	1.719	1.418	1.493	1.489	1.213	1.446	0.792	1.009	0.943	3.056	2.189	1.714	2.892	1.513	2.522	1.894	2.448	2.272	1.04	0.647	2.156	1.368	1.493	1.779	2.147	1.12	2.315	1.297	1.361	1.322	1.7	1.847
469.691	0.97	2.332	1.32	1.793	1.261	1.522	1.045	1.868	1.737	2.643	1.585	1.271	1.528	2.631	1.853	2.577	1.174	1.493	1.731	1.452	2.118	1.192	1.167	0.798	1.566	0.819	3.06	1.778	1.442	2.526	2.149	2.286	1.807	2.065	2.127	0.854	0.623	1.919	1.255	1.23	2.174	1.913	1.608	2.346	1.04	1.133	1.208	1.618	1.782
472.175	1.321	2.661	1.505	1.712	1.518	1.919	1.169	2.041	2.241	2.585	1.603	1.428	1.711	3.31	2.181	2.452	0.852	1.955	1.794	1.557	2.364	1.325	1.51	1.03	1.501	0.925	2.851	2.092	1.797	2.944	2.237	2.851	1.95	2.508	2.314	1.276	0.777	2.455	1.423	1.587	2.33	2.414	1.161	2.251	1.481	1.642	1.535	1.833	2.015
474.605	0.964	2.233	1.28	1.384	1.39	1.689	0.935	2.134	1.966	2.716	1.227	1.305	1.589	3.139	1.935	2.251	0.782	1.783	1.09	1.458	1.403	1.059	1.489	0.896	1.279	0.827	3.184	1.989	1.72	2.948	1.857	2.658	1.841	2.222	2.084	0.952	0.644	2.249	1.38	1.198	2.124	2.1	1.278	2.175	1.273	1.386	1.21	1.56	1.891
477.063	0.994	2.416	1.385	1.754	1.302	1.578	0.906	2.073	1.9	2.673	1.45	1.275	1.754	2.976	1.939	1.992	0.67	1.63	1.218	1.428	1.773	1.129	1.41	0.86	1.094	0.854	3.001	1.968	1.625	2.998	1.938	2.431	1.78	2.46	2.164	1.004	0.7	1.951	1.463	1.344	2.174	1.977	1.345	2.195	1.212	1.31	1.175	1.597	1.757
479.574	0.885	2.202	1.26	1.537	1.388	1.53	1.013	1.873	1.781	2.871	1.328	1.182	1.516	2.994	1.9	2.069	0.667	1.641	1.359	1.398	1.593	1.169	1.452	0.845	0.975	0.758	3.18	1.899	1.528	2.769	1.977	2.436	1.673	2.109	2.19	0.947	0.615	2.195	1.398	1.28	2.001	1.75	1.245	2.058	1.283	1.286	1.106	1.325	1.932
482.076	0.992	2.519	1.344	1.479	1.268	1.532	1.058	2.137	1.642	2.646	1.531	1.221	1.363	2.593	1.781	2.276	0.965	1.667	1.359	1.396	1.927	1.181	1.417	0.93	1.083	0.911	3.01	1.956	1.534	2.768	2.156	2.267	1.766	2.04	2.19	1.028	0.723	1.964	1.43	1.245	2.012	1.749	1.246	2.173	1.399	1.349	1.083	1.365	1.808
484.506	0.931	2.428	1.338	1.727	1.199	1.671	0.848	2.083	1.806	2.266	1.419	1.216	1.992	2.768	1.832	1.996	0.896	1.585	1.279	1.416	1.749	1.204	1.326	0.915	1.011	0.732	2.938	1.903	1.431	2.65	1.96	1.884	1.663	2.255	2.119	0.97	0.639	2.111	1.341	1.353	2.008	1.726	1.313	2.139	1.306	1.233	1.068	1.471	1.675
487.008	0.859	2.281	1.18	1.189	1.362	1.494	1.011	1.98	1.603	2.683	1.427	1.184	1.517	2.737	1.812	2.158	0.776	1.555	1.261	1.36	2.038	1.266	1.331	0.938	1.379	0.736	3.086	2	1.509	2.745	1.725	2.007	1.618	2.252	2.198	0.991	0.742	1.984	1.317	1.262	1.841	1.772	1.33	2.105	1.29	1.313	1.027	1.348	1.633
489.447	0.878	2.232	1.355	1.558	1.375	1.489	1.015	2.251	1.528	2.361	1.529	1.251	1.359	3.019	1.968	1.911	0.854	1.5	1.509	1.452	1.805	1.075	1.414	0.92	1.234	0.783	2.915	1.904	1.406	2.452	1.975	2.141	1.513	2.406	2.089	0.95	0.669	1.979	1.383	1.328	2.195	1.708	1.357	2.135	1.207	1.112	1.061	1.518	1.714
491.949	0.896	2.447	1.492	1.986	1.196	1.465	1.262	2.028	1.398	2.658	1.741	1.353	1.883	2.872	1.824	2.597	1.136	1.62	1.852	1.633	2.341	1.237	1.372	1.019	1.805	0.87	3.307	1.73	1.355	2.745	2.477	2.117	1.697	2.354	1.88	1.113	0.762	1.915	1.271	1.261	2.154	1.591	1.752	2.518	1.193	1.221	1.074	1.889	1.641
494.398	0.825	1.939	1.264	1.641	1.205	1.377	1.002	1.815	1.48	2.412	1.331	1.086	1.558	2.894	1.96	2.181	0.824	1.573	1.256	1.332	1.765	1.099	1.37	0.908	0.933	0.887	2.848	1.773	1.28	2.751	2.012	2.027	1.558	2.231	2.099	1.197	0.705	1.916	1.303	1.233	1.989	1.713	1.401	1.726	1.099	1.168	1.013	1.467	1.706
496.9	0.819	2.296	1.242	1.555	1.21	1.345	1.02	1.821	1.374	2.46	1.202	1.129	1.601	2.973	1.706	1.934	0.885	1.39	1.258	1.392	1.747	1.192	1.367	0.946	1.06	0.77	2.992	1.806	1.317	2.84	1.993	2.067	1.532	2.487	2.061	1.003	0.686	1.819	1.395	1.231	2.168	1.634	1.337	2.334	1.075	1.156	1.061	1.77	1.839
499.33	0.809	2.166	1.432	1.641	1.216	1.29	0.977	1.984	1.391	2.469	1.427	1.349	1.542	3.037	1.815	2.093	0.856	1.353	1.374	1.298	1.687	1.196	1.303	0.938	1.469	0.759	2.972	1.79	1.344	2.88	1.993	2.007	1.35	2.32	1.979	1.076	0.7	1.9	1.306	1.056	2.179	1.534	1.266	2.331	1.133	1.066	0.946	1.536	1.726
501.877	0.778	2.198	1.339	1.522	1.215	1.318	0.917	2.005	1.217	2.444	1.309	1.362	1.857	2.786	1.928	2.079	0.718	1.445	1.527	1.386	1.775	1.105	1.347	0.872	1.168	0.764	2.821	1.711	1.329	2.638	2.289	1.967	1.459	2.445	1.843	1.051	0.707	1.782	1.405	1.214	1.962	1.468	1.299	2.132	1.046	1.135	0.939	1.521	1.612
504.415	0.772	2.25	1.373	1.452	1.18	1.359	1.002	1.947	1.182	2.346	1.071	1.215	1.744	2.689	1.68	2.232	0.852	1.428	1.371	1.373	1.529	1.072	1.339	0.881	1.09	0.804	3.042	1.722	1.253	2.81	1.789	1.954	1.422	2.194	1.772	0.845	0.701	1.707	1.264	1.139	2.198	1.44	1.36	2.096	1.142	1.13	1.003	1.541	1.654
506.845	0.807	2.005	1.25	1.614	1.17	1.255	0.891	2.137	1.163	2.065	1.307	1.301	1.487	2.934	1.703	2.303	0.944	1.386	1.527	1.263	1.682	1.013	1.401	0.859	1.218	0.914	2.904	1.736	1.212	2.836	1.799	1.843	1.421	2.161	1.855	0.978	0.709	1.815	1.217	1.102	1.803	1.407	1.332	2.161	1.074	1.037	0.993	1.47	1.81
509.347	0.773	2.071	1.262	1.559	1.117	1.311	0.913	1.909	1.168	2.348	1.374	1.342	1.674	2.834	1.645	2.181	0.973	1.44	1.733	1.376	1.825	1.146	1.252	0.878	1.053	0.853	3.16	1.729	1.167	2.73	1.901	1.814	1.335	2.45	1.805	0.995	0.647	1.747	1.203	1.058	2.067	1.381	1.367	1.989	1.019	1.132	0.901	1.712	1.625
511.787	0.854	2.102	1.179	1.548	1.111	1.338	0.946	2.063	1.02	2.283	1.349	1.202	1.362	2.683	1.489	2.476	0.757	1.353	1.562	1.442	1.612	1.196	1.259	0.831	1.312	0.81	2.995	1.695	1.147	2.635	1.921	1.803	1.454	1.968	1.79	0.902	0.678	1.654	1.119	1.054	1.768	1.341	1.286	2.406	1.106	1.099	0.819	1.417	1.588
514.28	0.73	1.931	1.256	1.608	1.095	1.233	0.986	1.933	1.066	2.293	1.413	1.301	1.593	2.61	1.448	2.293	0.938	1.299	1.224	1.42	1.724	1.046	1.247	0.807	0.941	0.786	3.072	1.783	1.119	2.648	1.918	1.927	1.448	2.04	1.691	0.888	0.744	1.428	1.116	1.097	1.842	1.332	1.607	2.124	1.142	1.071	0.854	1.592	1.626
516.719	0.814	1.878	1.25	1.446	1.171	1.342	0.865	1.862	1.02	2.441	1.281	1.033	1.602	2.446	1.265	2.052	0.916	1.302	1.508	1.362	1.813	1.116	1.238	0.839	1.265	0.84	2.987	1.828	1.099	2.697	1.574	1.725	1.529	2.2	1.639	0.759	0.612	1.515	1.039	1.002	1.865	1.319	1.519	2.091	1.15	1.054	0.822	1.385	1.557
519.221	0.74	2.076	1.221	1.44	1.007	1.248	0.904	1.804	1.009	2.202	1.382	1.17	1.6	2.321	1.275	2.447	0.91	1.232	1.266	1.197	1.643	1.221	1.166	0.758	0.932	0.807	2.699	1.679	1.163	2.631	1.877	1.831	1.362	2.089	1.608	0.747	0.624	1.551	1.103	1.056	1.95	1.337	1.285	1.979	0.97	0.969	0.907	1.324	1.538
521.669	0.974	2.162	1.626	1.956	1.135	1.408	0.993	2.06	1.108	2.541	1.631	1.532	1.903	2.63	1.293	2.08	1.271	1.529	1.607	1.519	1.536	1.177	1.337	0.99	1.476	1.053	3.223	1.78	1.19	2.756	2.061	1.931	1.528	2.179	1.662	1.065	0.819	1.615	1.131	1.113	1.99	1.421	1.482	2.608	1.202	1.203	1.196	1.621	1.697
524.171	0.73	2.037	1.219	1.452	1.037	1.282	0.826	1.675	1.016	2.111	1.464	1.271	1.636	2.684	1.211	2.146	1.035	1.216	1.364	1.29	1.671	1.069	1.217	0.861	1.077	0.842	2.875	1.573	1.061	2.413	2.037	1.825	1.283	1.781	1.523	0.923	0.625	1.404	1.085	0.985	1.73	1.269	1.374	2.191	1.182	0.993	0.811	1.546	1.529
526.61	0.787	1.967	1.355	1.59	1.07	1.294	0.872	1.598	1.006	2.347	1.581	1.353	1.645	2.619	1.174	2.193	0.987	1.161	1.503	1.214	1.604	1.182	1.15	0.868	1.398	0.698	3.009	1.649	1.033	2.558	1.963	1.674	1.244	1.866	1.558	0.866	0.641	1.384	1.106	1.104	1.625	1.253	1.25	2.105	1.254	1.027	0.946	1.684	1.671
529.122	0.742	2.046	1.511	1.526	1.042	1.266	0.875	1.647	0.934	2.655	1.281	1.17	1.536	2.455	1.115	1.94	0.872	1.212	1.65	1.019	1.51	1.067	1.216	0.855	1.315	0.911	2.854	1.519	1.071	2.59	1.869	1.608	1.249	1.853	1.498	0.908	0.598	1.399	1.15	0.991	1.69	1.212	1.418	2.026	1.112	1.01	0.918	1.457	1.54
531.561	0.734	1.782	1.128	1.572	1.078	1.193	0.818	1.509	0.877	2.269	1.272	1.37	1.613	2.147	1.053	2.13	1.153	1.237	1.612	1.23	2.097	1.021	1.134	0.844	1.306	0.851	2.858	1.573	1.048	2.429	2.021	1.656	1.274	1.716	1.368	0.769	0.65	1.284	1.055	0.959	1.734	1.077	1.334	2.414	1.146	1.066	0.847	1.394	1.487
534.108	0.733	1.682	1.264	1.491	1.042	1.27	0.768	1.403	0.921	2.069	1.382	1.114	1.427	2.265	0.993	2.375	0.989	1.163	1.353	1.118	1.844	1.01	1.052	0.83	1.312	0.859	3.01	1.442	1.114	2.36	2.083	1.552	1.3	1.658	1.372	0.817	0.626	1.247	1.136	0.954	1.712	0.998	1.345	1.963	1.075	0.998	0.949	1.473	1.565
536.655	0.771	1.668	1.256	1.451	1.057	1.235	0.791	1.296	0.893	2.224	1.317	1.2	1.661	2.098	1.027	2.271	0.801	1.159	1.474	1.139	1.812	1.17	1.028	0.858	1.255	0.804	3.091	1.508	1.129	2.351	1.886	1.709	1.313	1.745	1.372	0.774	0.599	1.25	1.066	0.946	1.639	1.063	1.369	1.842	1.089	0.947	0.947	1.417	1.562
539.094	0.657	1.55	1.223	1.382	0.898	1.166	0.766	1.38	0.922	2.231	1.335	1.19	1.799	2.232	0.987	2.13	1.01	1.193	1.669	1.099	1.588	1.064	1.032	0.849	1.035	0.893	3.027	1.444	1.15	2.32	1.677	1.831	1.197	1.799	1.286	0.914	0.661	1.286	1.086	1.012	1.62	1.058	1.398	1.904	1.088	1.044	0.957	1.544	1.471
541.668	0.72	1.559	1.208	1.529	0.904	1.226	0.76	1.41	0.852	2.207	1.426	1.076	1.689	2.285	0.997	2.098	0.958	1.129	1.493	1.068	1.836	1.012	1.008	0.829	1.088	0.76	2.922	1.477	1.066	2.123	1.847	1.735	1.174	1.67	1.336	0.901	0.627	1.224	1.069	0.958	1.496	0.942	1.341	1.963	1.085	1.083	1.032	1.558	1.483
544.188	0.695	1.494	1.194	1.246	1.063	1.148	0.766	1.48	0.864	2.294	1.228	1.072	1.519	1.832	0.986	2.127	1.22	1.071	1.473	1.003	1.83	1.149	0.935	0.896	1.132	0.797	2.876	1.373	1.177	2.358	1.957	1.778	1.138	1.622	1.252	0.804	0.635	1.174	1.053	0.958	1.516	0.939	1.27	1.808	1.02	1.025	1.007	1.452	1.571
546.637	0.739	1.47	1.231	1.36	0.873	1.132	0.774	1.259	0.821	2.214	1.365	1.218	1.575	1.805	0.992	2.022	1.042	1.099	1.673	0.969	1.985	1	1.024	0.864	1.016	0.75	2.683	1.394	1.073	2.156	2.058	1.912	1.107	1.566	1.216	0.777	0.542	1.158	1.01	0.916	1.427	0.87	1.247	1.846	1	0.958	1.042	1.367	1.505
549.139	0.896	1.683	1.516	1.573	1.108	1.357	0.919	1.538	0.925	2.44	1.487	1.43	1.943	2.063	1.061	2.589	1.106	1.398	1.657	1.247	2.044	1.255	1.07	0.986	1.555	0.839	3.191	1.513	1.216	2.517	2.086	2.28	1.391	1.706	1.312	0.917	0.671	1.282	1.051	1.076	1.432	1.045	1.526	2.103	1.176	1.157	1.267	1.819	1.734
551.587	0.678	1.478	1.184	1.161	0.869	1.099	0.663	1.281	0.819	2.19	1.269	1.26	1.598	1.658	1.009	2.096	0.993	1.04	1.599	1.137	1.97	0.996	0.944	0.804	1.249	0.698	2.543	1.302	1.035	2.179	1.651	1.768	1.033	1.471	1.152	0.772	0.6	1.122	0.965	0.938	1.196	0.84	1.144	2.136	1.016	0.989	1.064	1.392	1.467
554.089	0.634	1.302	0.978	1.212	0.828	1.031	0.638	1.07	0.744	2.088	1.178	1.227	1.519	1.338	0.908	2.196	1.047	0.957	1.542	0.969	1.976	1.072	0.805	0.701	1.506	0.645	2.579	1.069	0.951	1.941	1.853	1.55	0.889	1.323	1.039	0.663	0.566	1.041	0.891	0.845	1.156	0.764	1.208	1.839	0.87	0.766	0.925	1.44	1.317
556.528	0.846	1.533	1.407	1.44	1.103	1.253	0.917	1.431	0.948	2.317	1.615	1.391	1.868	1.814	1.173	2.563	1.225	1.288	1.758	1.347	1.954	1.25	0.971	0.952	1.303	0.931	2.84	1.457	1.185	2.551	2.395	2.036	1.207	1.712	1.3	0.86	0.703	1.282	1.046	1.075	1.567	0.984	1.534	2.32	1.257	1.084	1.362	1.575	1.675
559.093	0.6	1.132	0.986	0.963	0.782	0.937	0.606	0.997	0.712	1.819	1.266	1.148	1.44	1.266	0.926	2.035	1.056	1.034	1.589	1.005	2.042	1.026	0.746	0.655	1.212	0.73	2.493	1.065	0.937	1.811	1.808	1.512	0.892	1.28	1.068	0.649	0.569	0.979	0.875	0.793	1.171	0.767	1.125	1.785	0.883	0.773	0.842	1.368	1.232
[truncated: 165 more columns]

## Sheet: Figure 1C KO Trace
time (s)
15.237	0.398	0.435	0.384	0.388	0.37	0.309	0.399	0.311	0.36	0.345	0.398	0.341	0.418	0.303	0.328	0.392	0.404	0.395	0.375	0.404	0.371	0.352	0.398	0.383	0.382	0.344	0.32	0.425	0.551	0.312	0.384	0.408	0.473	0.354	0.426	0.323	0.471	0.442	0.404	0.49	0.397	0.339	0.48	0.417	0.384	0.414	0.411	0.448	0.533
17.64	0.396	0.427	0.385	0.399	0.379	0.331	0.381	0.326	0.358	0.379	0.412	0.352	0.422	0.316	0.349	0.393	0.401	0.398	0.375	0.409	0.37	0.351	0.396	0.374	0.391	0.346	0.321	0.439	0.573	0.316	0.388	0.427	0.475	0.351	0.427	0.325	0.476	0.426	0.409	0.488	0.414	0.341	0.486	0.425	0.393	0.415	0.406	0.443	0.542
20.061	0.401	0.434	0.388	0.411	0.366	0.323	0.39	0.327	0.359	0.36	0.396	0.353	0.42	0.31	0.326	0.391	0.414	0.406	0.387	0.42	0.379	0.36	0.397	0.399	0.405	0.35	0.329	0.472	0.599	0.318	0.391	0.418	0.459	0.358	0.417	0.33	0.48	0.433	0.411	0.497	0.402	0.339	0.492	0.424	0.389	0.413	0.407	0.442	0.537
22.492	0.464	0.467	0.447	0.461	0.415	0.378	0.492	0.371	0.412	0.43	0.452	0.387	0.495	0.345	0.397	0.494	0.459	0.481	0.444	0.468	0.45	0.43	0.483	0.433	0.469	0.372	0.361	0.565	0.686	0.338	0.437	0.5	0.573	0.384	0.48	0.359	0.563	0.493	0.432	0.548	0.437	0.386	0.545	0.461	0.446	0.45	0.461	0.485	0.579
24.913	0.426	0.445	0.407	0.424	0.376	0.329	0.413	0.336	0.374	0.387	0.405	0.356	0.447	0.322	0.342	0.411	0.414	0.398	0.394	0.433	0.374	0.374	0.406	0.386	0.394	0.342	0.332	0.449	0.567	0.323	0.406	0.437	0.462	0.358	0.423	0.337	0.488	0.449	0.415	0.504	0.42	0.35	0.506	0.435	0.408	0.428	0.426	0.472	0.566
27.352	0.408	0.438	0.399	0.414	0.372	0.32	0.421	0.329	0.365	0.346	0.392	0.346	0.442	0.317	0.331	0.419	0.412	0.426	0.384	0.437	0.396	0.364	0.405	0.383	0.399	0.349	0.328	0.454	0.608	0.323	0.409	0.422	0.474	0.362	0.429	0.341	0.501	0.434	0.414	0.494	0.409	0.36	0.494	0.428	0.401	0.421	0.424	0.448	0.546
29.737	0.411	0.445	0.414	0.416	0.382	0.332	0.429	0.335	0.385	0.359	0.4	0.356	0.427	0.324	0.327	0.439	0.418	0.425	0.401	0.43	0.389	0.379	0.397	0.378	0.408	0.346	0.334	0.447	0.587	0.321	0.4	0.432	0.476	0.369	0.452	0.342	0.503	0.437	0.413	0.496	0.418	0.358	0.5	0.433	0.405	0.435	0.422	0.447	0.554
32.14	0.417	0.45	0.403	0.428	0.375	0.331	0.412	0.336	0.376	0.372	0.415	0.36	0.436	0.331	0.36	0.437	0.415	0.429	0.39	0.441	0.398	0.364	0.404	0.38	0.391	0.353	0.345	0.45	0.548	0.324	0.407	0.41	0.46	0.368	0.461	0.353	0.519	0.431	0.413	0.491	0.42	0.359	0.51	0.435	0.409	0.428	0.424	0.459	0.57
34.525	0.417	0.444	0.377	0.397	0.366	0.333	0.426	0.343	0.369	0.357	0.405	0.371	0.451	0.334	0.335	0.447	0.422	0.432	0.386	0.445	0.371	0.362	0.412	0.378	0.4	0.353	0.338	0.47	0.577	0.329	0.402	0.423	0.481	0.365	0.436	0.351	0.508	0.456	0.419	0.499	0.416	0.361	0.482	0.428	0.404	0.427	0.414	0.455	0.536
36.964	0.408	0.442	0.404	0.418	0.374	0.32	0.415	0.35	0.388	0.393	0.416	0.376	0.436	0.325	0.345	0.424	0.414	0.427	0.388	0.434	0.381	0.374	0.405	0.376	0.416	0.352	0.336	0.453	0.613	0.331	0.404	0.432	0.466	0.369	0.445	0.342	0.505	0.453	0.422	0.502	0.436	0.37	0.498	0.443	0.406	0.425	0.42	0.459	0.563
39.413	0.413	0.451	0.405	0.427	0.37	0.337	0.433	0.351	0.386	0.376	0.399	0.38	0.439	0.332	0.353	0.439	0.441	0.432	0.407	0.433	0.408	0.4	0.426	0.389	0.414	0.356	0.336	0.459	0.585	0.332	0.409	0.448	0.467	0.363	0.43	0.344	0.503	0.459	0.429	0.514	0.418	0.369	0.498	0.443	0.406	0.424	0.424	0.454	0.57
41.816	0.428	0.455	0.386	0.426	0.367	0.332	0.428	0.354	0.38	0.395	0.398	0.372	0.441	0.334	0.348	0.443	0.445	0.455	0.393	0.462	0.402	0.384	0.411	0.405	0.43	0.348	0.346	0.466	0.572	0.331	0.405	0.444	0.47	0.379	0.438	0.353	0.501	0.459	0.431	0.499	0.431	0.367	0.495	0.437	0.417	0.431	0.422	0.458	0.562
44.255	0.429	0.457	0.398	0.437	0.365	0.332	0.424	0.359	0.394	0.396	0.402	0.365	0.441	0.334	0.349	0.46	0.436	0.44	0.406	0.449	0.395	0.384	0.435	0.363	0.382	0.35	0.346	0.489	0.605	0.329	0.407	0.429	0.463	0.369	0.435	0.354	0.494	0.455	0.432	0.49	0.433	0.368	0.504	0.453	0.422	0.435	0.445	0.467	0.574
46.703	0.383	0.435	0.368	0.389	0.36	0.323	0.389	0.34	0.347	0.363	0.39	0.35	0.418	0.329	0.321	0.402	0.421	0.408	0.382	0.439	0.369	0.357	0.374	0.369	0.364	0.345	0.336	0.425	0.53	0.329	0.396	0.402	0.434	0.352	0.42	0.338	0.468	0.415	0.407	0.479	0.416	0.362	0.471	0.422	0.397	0.415	0.406	0.445	0.533
49.106	0.425	0.459	0.4	0.425	0.368	0.338	0.427	0.354	0.392	0.408	0.399	0.361	0.452	0.335	0.351	0.465	0.437	0.438	0.406	0.463	0.394	0.399	0.437	0.409	0.398	0.362	0.35	0.478	0.599	0.345	0.415	0.442	0.473	0.371	0.443	0.354	0.5	0.454	0.431	0.498	0.435	0.372	0.505	0.446	0.415	0.432	0.429	0.461	0.568
51.545	0.419	0.458	0.403	0.422	0.366	0.341	0.449	0.354	0.391	0.392	0.413	0.376	0.446	0.347	0.351	0.468	0.431	0.434	0.402	0.471	0.397	0.384	0.42	0.407	0.392	0.354	0.349	0.469	0.58	0.339	0.409	0.445	0.467	0.376	0.446	0.355	0.518	0.459	0.437	0.495	0.429	0.376	0.498	0.439	0.406	0.442	0.421	0.458	0.554
53.975	0.427	0.462	0.397	0.413	0.373	0.334	0.426	0.363	0.395	0.363	0.406	0.376	0.454	0.335	0.366	0.457	0.444	0.425	0.406	0.466	0.405	0.396	0.429	0.416	0.425	0.359	0.346	0.49	0.582	0.342	0.412	0.46	0.514	0.372	0.444	0.362	0.518	0.458	0.434	0.492	0.444	0.374	0.495	0.445	0.398	0.442	0.422	0.466	0.573
56.333	0.426	0.457	0.376	0.422	0.367	0.336	0.449	0.358	0.395	0.394	0.403	0.369	0.451	0.335	0.364	0.498	0.429	0.424	0.414	0.461	0.406	0.409	0.43	0.42	0.416	0.363	0.347	0.467	0.564	0.342	0.416	0.474	0.488	0.386	0.461	0.372	0.541	0.456	0.438	0.486	0.436	0.371	0.497	0.446	0.42	0.432	0.427	0.46	0.565
58.719	0.432	0.461	0.407	0.424	0.363	0.351	0.44	0.358	0.398	0.394	0.396	0.363	0.45	0.347	0.361	0.466	0.44	0.432	0.425	0.483	0.413	0.416	0.43	0.407	0.431	0.363	0.364	0.483	0.598	0.343	0.433	0.477	0.489	0.376	0.452	0.358	0.516	0.48	0.448	0.501	0.432	0.383	0.506	0.459	0.418	0.445	0.444	0.467	0.581
61.158	0.411	0.457	0.399	0.413	0.38	0.34	0.426	0.362	0.377	0.373	0.414	0.362	0.447	0.347	0.361	0.462	0.442	0.438	0.401	0.475	0.399	0.396	0.447	0.397	0.414	0.357	0.351	0.461	0.585	0.35	0.436	0.447	0.464	0.38	0.432	0.361	0.502	0.46	0.434	0.499	0.442	0.382	0.504	0.44	0.412	0.43	0.42	0.458	0.56
63.606	0.448	0.467	0.399	0.408	0.382	0.353	0.433	0.368	0.374	0.392	0.419	0.377	0.456	0.364	0.409	0.464	0.447	0.474	0.41	0.473	0.414	0.393	0.429	0.414	0.421	0.358	0.358	0.488	0.626	0.346	0.429	0.458	0.495	0.376	0.463	0.364	0.5	0.462	0.442	0.503	0.467	0.38	0.511	0.453	0.423	0.439	0.44	0.47	0.571
66.009	0.43	0.457	0.406	0.43	0.383	0.349	0.411	0.364	0.406	0.388	0.406	0.373	0.442	0.345	0.377	0.469	0.446	0.46	0.415	0.476	0.396	0.422	0.45	0.411	0.417	0.361	0.353	0.485	0.579	0.346	0.424	0.476	0.477	0.37	0.443	0.36	0.518	0.476	0.452	0.491	0.435	0.383	0.517	0.454	0.412	0.44	0.437	0.454	0.591
68.448	0.43	0.457	0.397	0.431	0.371	0.338	0.453	0.353	0.397	0.425	0.407	0.364	0.452	0.347	0.355	0.49	0.427	0.432	0.411	0.471	0.402	0.407	0.439	0.42	0.432	0.358	0.366	0.477	0.562	0.353	0.443	0.484	0.454	0.381	0.456	0.37	0.536	0.461	0.441	0.511	0.441	0.381	0.51	0.455	0.425	0.438	0.434	0.459	0.581
70.896	0.439	0.46	0.394	0.439	0.367	0.334	0.438	0.359	0.4	0.383	0.411	0.377	0.44	0.354	0.363	0.472	0.429	0.44	0.399	0.473	0.413	0.391	0.437	0.422	0.449	0.361	0.37	0.452	0.559	0.357	0.442	0.476	0.475	0.381	0.461	0.367	0.516	0.463	0.442	0.506	0.442	0.393	0.515	0.448	0.416	0.441	0.443	0.458	0.559
73.317	0.437	0.473	0.401	0.427	0.375	0.333	0.448	0.36	0.407	0.43	0.421	0.36	0.463	0.352	0.368	0.49	0.449	0.469	0.405	0.482	0.405	0.396	0.457	0.413	0.411	0.364	0.365	0.465	0.603	0.358	0.45	0.464	0.492	0.384	0.454	0.364	0.524	0.467	0.443	0.527	0.44	0.397	0.517	0.462	0.418	0.444	0.437	0.462	0.584
75.802	0.405	0.444	0.381	0.418	0.36	0.324	0.419	0.346	0.374	0.367	0.389	0.356	0.427	0.338	0.334	0.442	0.412	0.395	0.382	0.449	0.37	0.368	0.402	0.362	0.391	0.347	0.353	0.406	0.496	0.343	0.42	0.415	0.418	0.366	0.432	0.354	0.479	0.438	0.434	0.498	0.425	0.369	0.485	0.432	0.394	0.426	0.412	0.439	0.548
78.205	0.447	0.473	0.393	0.446	0.379	0.352	0.448	0.371	0.389	0.388	0.405	0.363	0.442	0.349	0.369	0.476	0.446	0.443	0.412	0.489	0.43	0.414	0.456	0.428	0.439	0.366	0.366	0.478	0.612	0.363	0.436	0.483	0.491	0.384	0.459	0.369	0.519	0.466	0.444	0.51	0.457	0.385	0.511	0.457	0.42	0.457	0.448	0.463	0.576
80.653	0.434	0.473	0.404	0.44	0.395	0.344	0.43	0.36	0.415	0.435	0.413	0.362	0.449	0.347	0.364	0.461	0.444	0.427	0.414	0.492	0.422	0.413	0.437	0.393	0.442	0.366	0.368	0.483	0.54	0.366	0.441	0.471	0.478	0.376	0.449	0.367	0.502	0.469	0.455	0.529	0.449	0.392	0.525	0.464	0.425	0.453	0.444	0.467	0.593
83.092	0.426	0.479	0.404	0.434	0.369	0.348	0.462	0.365	0.42	0.461	0.394	0.368	0.472	0.344	0.359	0.48	0.456	0.456	0.423	0.483	0.405	0.397	0.435	0.392	0.42	0.359	0.367	0.486	0.606	0.365	0.446	0.477	0.499	0.381	0.438	0.374	0.52	0.481	0.453	0.511	0.446	0.385	0.502	0.469	0.427	0.453	0.447	0.471	0.605
85.495	0.397	0.454	0.377	0.413	0.353	0.33	0.403	0.347	0.365	0.366	0.39	0.351	0.43	0.338	0.342	0.438	0.433	0.412	0.385	0.468	0.38	0.373	0.401	0.365	0.384	0.351	0.352	0.453	0.516	0.345	0.429	0.415	0.441	0.373	0.431	0.359	0.467	0.447	0.439	0.495	0.428	0.374	0.486	0.441	0.405	0.429	0.433	0.461	0.544
87.943	0.43	0.483	0.416	0.432	0.387	0.354	0.431	0.361	0.415	0.404	0.415	0.36	0.45	0.353	0.368	0.452	0.444	0.428	0.412	0.501	0.408	0.399	0.438	0.388	0.385	0.365	0.361	0.468	0.553	0.359	0.437	0.458	0.492	0.379	0.456	0.363	0.522	0.457	0.443	0.518	0.46	0.396	0.515	0.472	0.429	0.455	0.448	0.458	0.599
90.301	0.438	0.468	0.399	0.437	0.374	0.345	0.433	0.364	0.4	0.394	0.412	0.371	0.45	0.354	0.361	0.47	0.445	0.434	0.416	0.488	0.418	0.434	0.419	0.412	0.431	0.356	0.362	0.488	0.583	0.355	0.431	0.454	0.477	0.374	0.438	0.361	0.518	0.467	0.455	0.517	0.446	0.392	0.507	0.463	0.423	0.45	0.448	0.461	0.597
92.723	0.427	0.467	0.401	0.446	0.375	0.352	0.45	0.362	0.434	0.435	0.405	0.365	0.468	0.354	0.357	0.496	0.469	0.459	0.417	0.49	0.422	0.425	0.457	0.422	0.422	0.359	0.37	0.477	0.596	0.362	0.457	0.473	0.502	0.385	0.453	0.372	0.542	0.48	0.446	0.518	0.457	0.392	0.527	0.472	0.43	0.451	0.46	0.454	0.614
95.126	0.43	0.465	0.411	0.431	0.379	0.356	0.427	0.363	0.398	0.406	0.414	0.366	0.466	0.351	0.367	0.486	0.453	0.457	0.424	0.491	0.421	0.425	0.456	0.405	0.391	0.354	0.356	0.489	0.573	0.36	0.447	0.492	0.501	0.379	0.465	0.367	0.509	0.474	0.443	0.534	0.464	0.4	0.517	0.458	0.41	0.446	0.433	0.452	0.586
97.574	0.43	0.467	0.414	0.453	0.368	0.351	0.435	0.357	0.427	0.43	0.401	0.361	0.453	0.348	0.371	0.476	0.45	0.465	0.413	0.484	0.429	0.41	0.433	0.425	0.406	0.358	0.366	0.455	0.581	0.358	0.445	0.464	0.508	0.376	0.455	0.371	0.524	0.464	0.442	0.535	0.455	0.399	0.512	0.466	0.427	0.447	0.446	0.463	0.606
100.013	0.423	0.461	0.397	0.425	0.378	0.358	0.438	0.36	0.414	0.413	0.41	0.366	0.461	0.352	0.372	0.475	0.46	0.468	0.42	0.496	0.423	0.434	0.439	0.426	0.416	0.362	0.356	0.476	0.594	0.359	0.447	0.496	0.489	0.38	0.455	0.367	0.493	0.47	0.45	0.54	0.46	0.394	0.517	0.452	0.419	0.438	0.433	0.45	0.584
102.416	0.424	0.459	0.404	0.432	0.373	0.35	0.445	0.365	0.42	0.435	0.413	0.371	0.463	0.354	0.373	0.485	0.474	0.467	0.424	0.502	0.412	0.456	0.423	0.396	0.447	0.358	0.351	0.488	0.58	0.365	0.448	0.452	0.514	0.386	0.452	0.37	0.53	0.478	0.442	0.531	0.472	0.391	0.51	0.457	0.429	0.45	0.437	0.467	0.602
104.927	0.428	0.462	0.419	0.439	0.37	0.348	0.428	0.365	0.454	0.464	0.404	0.373	0.477	0.354	0.386	0.501	0.468	0.461	0.435	0.503	0.44	0.419	0.438	0.395	0.416	0.369	0.36	0.483	0.605	0.367	0.467	0.464	0.51	0.385	0.46	0.373	0.542	0.468	0.443	0.532	0.467	0.392	0.526	0.463	0.425	0.447	0.438	0.461	0.602
107.348	0.458	0.475	0.421	0.458	0.38	0.351	0.437	0.369	0.434	0.381	0.405	0.371	0.464	0.356	0.388	0.47	0.469	0.47	0.438	0.503	0.421	0.421	0.436	0.405	0.436	0.365	0.36	0.471	0.579	0.362	0.452	0.468	0.481	0.385	0.471	0.367	0.517	0.467	0.445	0.51	0.45	0.406	0.537	0.463	0.426	0.458	0.444	0.47	0.603
109.77	0.436	0.464	0.414	0.456	0.378	0.346	0.425	0.366	0.433	0.414	0.411	0.371	0.466	0.356	0.371	0.47	0.462	0.463	0.42	0.507	0.404	0.421	0.445	0.396	0.408	0.361	0.364	0.474	0.577	0.354	0.449	0.472	0.488	0.388	0.461	0.364	0.505	0.471	0.445	0.522	0.453	0.389	0.51	0.456	0.435	0.452	0.443	0.455	0.612
112.218	0.448	0.473	0.403	0.438	0.391	0.366	0.441	0.368	0.426	0.407	0.412	0.379	0.475	0.363	0.386	0.49	0.466	0.483	0.42	0.5	0.41	0.43	0.445	0.402	0.401	0.357	0.364	0.484	0.619	0.356	0.44	0.445	0.483	0.383	0.444	0.374	0.54	0.479	0.452	0.526	0.466	0.409	0.514	0.455	0.422	0.451	0.447	0.457	0.605
114.639	0.414	0.465	0.384	0.409	0.375	0.332	0.398	0.351	0.396	0.402	0.404	0.36	0.439	0.349	0.359	0.451	0.439	0.426	0.391	0.471	0.386	0.371	0.401	0.394	0.415	0.348	0.352	0.435	0.536	0.35	0.426	0.432	0.459	0.374	0.437	0.361	0.492	0.45	0.442	0.496	0.463	0.378	0.486	0.442	0.404	0.438	0.427	0.454	0.577
117.141	0.44	0.472	0.421	0.434	0.392	0.357	0.438	0.36	0.424	0.423	0.416	0.374	0.483	0.368	0.393	0.482	0.477	0.471	0.421	0.498	0.418	0.427	0.457	0.441	0.427	0.366	0.368	0.485	0.61	0.362	0.463	0.477	0.503	0.39	0.455	0.374	0.523	0.49	0.449	0.55	0.482	0.411	0.524	0.459	0.433	0.45	0.457	0.456	0.601
119.562	0.435	0.474	0.421	0.434	0.392	0.356	0.432	0.357	0.45	0.433	0.416	0.365	0.464	0.361	0.384	0.482	0.448	0.462	0.425	0.494	0.425	0.431	0.461	0.418	0.456	0.364	0.366	0.465	0.582	0.356	0.455	0.457	0.477	0.397	0.462	0.37	0.506	0.473	0.443	0.537	0.473	0.41	0.517	0.462	0.446	0.443	0.466	0.466	0.622
121.992	0.447	0.475	0.416	0.442	0.394	0.366	0.429	0.371	0.466	0.394	0.413	0.377	0.466	0.36	0.376	0.491	0.468	0.466	0.418	0.492	0.431	0.41	0.446	0.417	0.418	0.361	0.36	0.481	0.579	0.356	0.452	0.46	0.489	0.393	0.444	0.369	0.526	0.478	0.444	0.523	0.468	0.399	0.52	0.462	0.423	0.45	0.445	0.466	0.606
124.449	0.419	0.458	0.396	0.422	0.364	0.342	0.41	0.353	0.395	0.403	0.388	0.359	0.436	0.346	0.354	0.457	0.443	0.434	0.394	0.48	0.374	0.394	0.405	0.372	0.368	0.35	0.35	0.445	0.556	0.348	0.415	0.433	0.442	0.371	0.434	0.359	0.491	0.455	0.439	0.502	0.451	0.382	0.483	0.442	0.41	0.431	0.42	0.453	0.565
126.916	0.459	0.478	0.428	0.456	0.378	0.349	0.449	0.366	0.421	0.408	0.405	0.366	0.462	0.356	0.376	0.504	0.457	0.451	0.424	0.508	0.431	0.422	0.439	0.42	0.42	0.366	0.365	0.466	0.566	0.352	0.437	0.467	0.507	0.4	0.459	0.375	0.522	0.474	0.444	0.54	0.478	0.397	0.53	0.459	0.43	0.447	0.455	0.468	0.61
129.364	0.435	0.473	0.425	0.448	0.366	0.357	0.464	0.376	0.43	0.434	0.419	0.378	0.463	0.359	0.381	0.509	0.475	0.465	0.404	0.505	0.452	0.408	0.441	0.403	0.431	0.374	0.373	0.499	0.623	0.359	0.448	0.479	0.477	0.406	0.466	0.384	0.527	0.481	0.449	0.532	0.476	0.409	0.535	0.463	0.432	0.437	0.451	0.456	0.608
131.767	0.404	0.459	0.385	0.416	0.351	0.335	0.411	0.353	0.395	0.396	0.388	0.364	0.465	0.348	0.35	0.453	0.448	0.445	0.38	0.496	0.386	0.357	0.422	0.391	0.386	0.351	0.364	0.488	0.549	0.352	0.439	0.429	0.435	0.381	0.433	0.362	0.488	0.473	0.45	0.495	0.446	0.391	0.495	0.443	0.412	0.433	0.43	0.446	0.581
134.206	0.427	0.461	0.402	0.428	0.395	0.363	0.472	0.37	0.416	0.43	0.423	0.373	0.485	0.366	0.389	0.501	0.471	0.484	0.417	0.52	0.441	0.411	0.462	0.421	0.425	0.366	0.368	0.511	0.656	0.362	0.451	0.479	0.473	0.401	0.474	0.381	0.548	0.462	0.447	0.508	0.475	0.392	0.522	0.455	0.423	0.447	0.445	0.458	0.598
136.654	0.428	0.468	0.401	0.442	0.374	0.36	0.429	0.366	0.435	0.406	0.407	0.379	0.465	0.352	0.383	0.496	0.464	0.48	0.43	0.509	0.436	0.433	0.46	0.413	0.42	0.369	0.364	0.538	0.632	0.36	0.438	0.483	0.5	0.392	0.446	0.377	0.524	0.479	0.449	0.505	0.464	0.399	0.521	0.452	0.424	0.444	0.443	0.45	0.6
139.075	0.437	0.469	0.407	0.457	0.373	0.358	0.456	0.369	0.448	0.413	0.42	0.381	0.467	0.358	0.385	0.495	0.482	0.477	0.42	0.519	0.44	0.452	0.437	0.404	0.408	0.367	0.373	0.499	0.614	0.363	0.456	0.467	0.494	0.39	0.456	0.376	0.528	0.476	0.444	0.535	0.469	0.411	0.541	0.47	0.431	0.458	0.46	0.461	0.625
141.595	0.431	0.471	0.431	0.468	0.383	0.359	0.456	0.376	0.455	0.43	0.418	0.391	0.477	0.375	0.395	0.495	0.476	0.458	0.436	0.507	0.438	0.427	0.446	0.407	0.44	0.374	0.367	0.495	0.608	0.363	0.455	0.465	0.494	0.409	0.47	0.378	0.541	0.494	0.459	0.53	0.484	0.407	0.546	0.462	0.431	0.446	0.458	0.464	0.611
143.998	0.384	0.467	0.397	0.453	0.384	0.364	0.475	0.381	0.418	0.46	0.419	0.395	0.487	0.368	0.39	0.52	0.489	0.477	0.426	0.517	0.44	0.455	0.463	0.413	0.395	0.367	0.367	0.494	0.626	0.358	0.442	0.486	0.525	0.396	0.469	0.382	0.549	0.486	0.455	0.538	0.484	0.404	0.526	0.463	0.426	0.444	0.445	0.452	0.609
146.447	0.613	0.476	0.391	0.439	0.389	0.368	0.464	0.371	0.432	0.432	0.406	0.39	0.486	0.363	0.399	0.5	0.477	0.486	0.425	0.498	0.404	0.425	0.468	0.439	0.455	0.377	0.367	0.454	0.593	0.371	0.443	0.488	0.499	0.396	0.474	0.379	0.542	0.493	0.452	0.541	0.482	0.394	0.524	0.462	0.429	0.452	0.449	0.459	0.6
148.868	0.435	0.485	0.421	0.462	0.377	0.361	0.473	0.365	0.449	0.47	0.413	0.385	0.482	0.367	0.395	0.52	0.46	0.477	0.422	0.487	0.409	0.446	0.465	0.404	0.401	0.361	0.369	0.49	0.573	0.365	0.453	0.49	0.491	0.396	0.465	0.377	0.52	0.501	0.453	0.563	0.486	0.415	0.554	0.469	0.435	0.453	0.468	0.457	0.64
151.271	0.457	0.489	0.383	0.453	0.387	0.368	0.431	0.379	0.4	0.424	0.417	0.384	0.473	0.362	0.379	0.498	0.476	0.494	0.423	0.5	0.419	0.429	0.449	0.427	0.411	0.36	0.381	0.48	0.559	0.362	0.462	0.48	0.529	0.397	0.455	0.38	0.536	0.495	0.451	0.54	0.476	0.412	0.524	0.46	0.431	0.455	0.468	0.464	0.619
153.719	0.435	0.486	0.399	0.451	0.391	0.363	0.461	0.367	0.431	0.445	0.409	0.378	0.479	0.365	0.378	0.498	0.489	0.489	0.424	0.518	0.431	0.426	0.457	0.4	0.438	0.372	0.369	0.504	0.618	0.362	0.448	0.473	0.48	0.393	0.466	0.38	0.542	0.491	0.45	0.562	0.482	0.417	0.53	0.465	0.428	0.451	0.453	0.459	0.611
156.14	0.437	0.476	0.385	0.443	0.38	0.371	0.465	0.372	0.408	0.421	0.405	0.38	0.485	0.367	0.391	0.531	0.47	0.477	0.432	0.509	0.442	0.442	0.469	0.408	0.436	0.366	0.373	0.492	0.611	0.362	0.448	0.478	0.507	0.396	0.464	0.378	0.556	0.475	0.453	0.522	0.481	0.401	0.535	0.459	0.425	0.454	0.444	0.456	0.608
158.543	0.444	0.472	0.41	0.449	0.386	0.368	0.458	0.376	0.416	0.43	0.416	0.392	0.481	0.365	0.382	0.505	0.477	0.469	0.434	0.519	0.421	0.434	0.429	0.392	0.428	0.37	0.362	0.507	0.626	0.351	0.447	0.47	0.506	0.385	0.457	0.37	0.5	0.485	0.454	0.552	0.495	0.408	0.545	0.466	0.436	0.45	0.465	0.463	0.617
160.982	0.438	0.475	0.38	0.458	0.392	0.367	0.491	0.376	0.442	0.452	0.421	0.384	0.48	0.366	0.384	0.5	0.48	0.487	0.432	0.515	0.438	0.452	0.452	0.413	0.421	0.374	0.368	0.49	0.586	0.365	0.441	0.476	0.5	0.392	0.446	0.368	0.525	0.485	0.454	0.544	0.474	0.409	0.546	0.455	0.431	0.447	0.444	0.453	0.629
163.449	0.442	0.479	0.397	0.455	0.4	0.372	0.457	0.369	0.446	0.462	0.413	0.37	0.474	0.359	0.395	0.498	0.475	0.451	0.428	0.5	0.413	0.445	0.458	0.432	0.425	0.367	0.374	0.474	0.582	0.364	0.452	0.503	0.51	0.39	0.449	0.377	0.534	0.49	0.442	0.523	0.486	0.414	0.543	0.467	0.426	0.448	0.447	0.46	0.631
165.915	0.421	0.463	0.308	0.42	0.363	0.35	0.407	0.349	0.4	0.418	0.383	0.368	0.435	0.352	0.359	0.455	0.448	0.439	0.409	0.5	0.423	0.414	0.439	0.39	0.391	0.345	0.357	0.454	0.528	0.354	0.414	0.426	0.473	0.388	0.44	0.366	0.476	0.465	0.441	0.5	0.452	0.383	0.509	0.45	0.413	0.433	0.435	0.449	0.592
168.381	0.408	0.453	0.369	0.422	0.368	0.336	0.411	0.358	0.401	0.416	0.396	0.363	0.454	0.355	0.351	0.434	0.452	0.435	0.395	0.494	0.397	0.401	0.41	0.38	0.42	0.354	0.351	0.452	0.554	0.355	0.435	0.425	0.478	0.379	0.43	0.36	0.459	0.457	0.444	0.509	0.467	0.405	0.514	0.448	0.409	0.426	0.436	0.439	0.573
170.766	0.4	0.454	0.407	0.428	0.375	0.345	0.438	0.355	0.397	0.398	0.395	0.363	0.453	0.358	0.367	0.461	0.455	0.444	0.401	0.496	0.406	0.404	0.443	0.406	0.397	0.356	0.362	0.451	0.563	0.356	0.443	0.437	0.458	0.382	0.455	0.362	0.486	0.475	0.445	0.503	0.46	0.389	0.508	0.447	0.401	0.425	0.411	0.436	0.578
173.223	0.428	0.468	0.466	0.452	0.375	0.37	0.443	0.366	0.413	0.441	0.408	0.383	0.468	0.365	0.38	0.496	0.481	0.495	0.431	0.521	0.443	0.465	0.485	0.433	0.428	0.369	0.38	0.484	0.631	0.37	0.462	0.486	0.506	0.397	0.472	0.377	0.526	0.483	0.453	0.517	0.479	0.399	0.53	0.457	0.406	0.445	0.441	0.445	0.611
175.653	0.419	0.468	0.463	0.449	0.388	0.382	0.436	0.355	0.446	0.445	0.412	0.381	0.456	0.369	0.383	0.51	0.483	0.481	0.42	0.518	0.409	0.446	0.451	0.418	0.43	0.366	0.374	0.475	0.628	0.363	0.456	0.482	0.481	0.386	0.47	0.374	0.53	0.496	0.455	0.535	0.48	0.42	0.541	0.458	0.427	0.443	0.453	0.444	0.633
178.11	0.431	0.465	0.384	0.426	0.375	0.341	0.407	0.363	0.394	0.399	0.391	0.356	0.444	0.365	0.359	0.459	0.441	0.436	0.417	0.499	0.402	0.4	0.392	0.375	0.372	0.349	0.355	0.425	0.515	0.347	0.418	0.436	0.464	0.385	0.445	0.362	0.481	0.457	0.437	0.471	0.462	0.382	0.494	0.445	0.419	0.432	0.433	0.444	0.591
180.577	0.439	0.472	0.423	0.452	0.398	0.37	0.472	0.384	0.421	0.409	0.412	0.381	0.47	0.372	0.397	0.546	0.478	0.478	0.423	0.535	0.437	0.444	0.437	0.423	0.414	0.368	0.364	0.496	0.579	0.358	0.452	0.47	0.464	0.406	0.469	0.384	0.52	0.502	0.457	0.542	0.486	0.41	0.54	0.464	0.423	0.449	0.457	0.454	0.627
183.007	0.454	0.471	0.413	0.447	0.389	0.368	0.459	0.386	0.421	0.427	0.414	0.383	0.472	0.376	0.394	0.51	0.476	0.471	0.416	0.51	0.422	0.429	0.443	0.412	0.416	0.37	0.369	0.482	0.579	0.358	0.449	0.472	0.489	0.396	0.47	0.377	0.533	0.505	0.452	0.543	0.476	0.408	0.52	0.46	0.424	0.445	0.445	0.441	0.622
185.527	0.428	0.474	0.438	0.487	0.409	0.36	0.466	0.376	0.456	0.47	0.414	0.376	0.459	0.372	0.403	0.512	0.467	0.485	0.44	0.515	0.445	0.451	0.478	0.4	0.411	0.378	0.373	0.481	0.654	0.364	0.441	0.469	0.497	0.399	0.476	0.383	0.53	0.487	0.455	0.547	0.501	0.415	0.532	0.479	0.431	0.435	0.451	0.453	0.644
187.993	0.41	0.459	0.386	0.427	0.382	0.35	0.407	0.364	0.391	0.399	0.408	0.37	0.421	0.359	0.373	0.456	0.437	0.437	0.393	0.495	0.39	0.385	0.425	0.394	0.412	0.357	0.37	0.441	0.557	0.358	0.444	0.438	0.452	0.388	0.434	0.368	0.473	0.469	0.442	0.514	0.477	0.385	0.503	0.44	0.396	0.423	0.418	0.426	0.587
190.459	0.449	0.48	0.412	0.456	0.39	0.376	0.46	0.36	0.44	0.441	0.423	0.384	0.463	0.372	0.4	0.501	0.482	0.475	0.424	0.541	0.437	0.427	0.482	0.422	0.461	0.373	0.376	0.466	0.64	0.366	0.466	0.465	0.476	0.406	0.465	0.387	0.522	0.489	0.458	0.54	0.49	0.422	0.531	0.469	0.421	0.45	0.443	0.457	0.621
192.898	0.411	0.457	0.393	0.421	0.37	0.349	0.397	0.539	0.397	0.427	0.397	0.368	0.436	0.362	0.371	0.401	0.439	0.439	0.389	0.489	0.391	0.398	0.411	0.389	0.404	0.358	0.361	0.436	0.541	0.351	0.414	0.412	0.467	0.376	0.434	0.364	0.483	0.454	0.445	0.517	0.464	0.388	0.507	0.446	0.401	0.427	0.428	0.439	0.591
195.4	0.443	0.476	0.432	0.451	0.389	0.365	0.445	0.369	0.415	0.455	0.414	0.367	0.46	0.364	0.386	0.514	0.478	0.466	0.442	0.522	0.421	0.46	0.455	0.415	0.472	0.375	0.373	0.503	0.631	0.362	0.462	0.458	0.519	0.399	0.467	0.384	0.565	0.481	0.462	0.545	0.486	0.407	0.528	0.458	0.428	0.443	0.456	0.451	0.623
197.849	0.458	0.481	0.408	0.467	0.393	0.359	0.442	0.372	0.434	0.423	0.421	0.365	0.474	0.37	0.394	0.484	0.469	0.479	0.444	0.523	0.44	0.46	0.446	0.426	0.433	0.367	0.374	0.483	0.639	0.366	0.452	0.463	0.547	0.395	0.464	0.381	0.525	0.492	0.459	0.543	0.496	0.405	0.525	0.463	0.442	0.447	0.453	0.45	0.622
200.333	0.433	0.458	0.385	0.411	0.37	0.349	0.422	0.353	0.405	0.409	0.401	0.363	0.439	0.364	0.36	0.456	0.443	0.433	0.403	0.511	0.392	0.404	0.407	0.373	0.38	0.353	0.357	0.446	0.52	0.348	0.416	0.397	0.465	0.388	0.447	0.37	0.478	0.463	0.451	0.536	0.464	0.392	0.5	0.448	0.411	0.435	0.432	0.423	0.591
202.754	0.411	0.456	0.387	0.414	0.352	0.334	0.41	0.345	0.373	0.379	0.387	0.358	0.428	0.363	0.349	0.47	0.433	0.398	0.393	0.491	0.384	0.388	0.44	0.402	0.371	0.354	0.363	0.439	0.522	0.363	0.44	0.422	0.436	0.386	0.427	0.367	0.492	0.445	0.453	0.509	0.461	0.384	0.49	0.439	0.405	0.426	0.413	0.437	0.582
205.22	0.443	0.467	0.417	0.439	0.396	0.384	0.439	0.384	0.449	0.412	0.407	0.38	0.473	0.377	0.39	0.505	0.444	0.444	0.424	0.506	0.421	0.41	0.439	0.418	0.427	0.374	0.363	0.475	0.622	0.358	0.46	0.469	0.482	0.399	0.457	0.378	0.509	0.495	0.476	0.545	0.498	0.407	0.515	0.459	0.423	0.45	0.44	0.449	0.614
207.623	0.459	0.487	0.408	0.443	0.378	0.359	0.471	0.376	0.402	0.444	0.402	0.363	0.47	0.371	0.411	0.516	0.453	0.449	0.439	0.517	0.44	0.451	0.488	0.407	0.425	0.376	0.376	0.478	0.593	0.371	0.46	0.431	0.491	0.405	0.476	0.384	0.56	0.494	0.468	0.54	0.496	0.398	0.517	0.46	0.428	0.451	0.459	0.461	0.619
210.044	0.457	0.476	0.418	0.446	0.391	0.382	0.461	0.387	0.454	0.449	0.421	0.385	0.475	0.382	0.412	0.516	0.452	0.457	0.446	0.529	0.475	0.458	0.451	0.404	0.459	0.381	0.368	0.497	0.622	0.36	0.453	0.455	0.526	0.395	0.452	0.382	0.523	0.497	0.472	0.571	0.501	0.412	0.534	0.464	0.428	0.452	0.451	0.453	0.618
212.573	0.451	0.479	0.416	0.455	0.397	0.386	0.476	0.377	0.431	0.408	0.41	0.382	0.469	0.38	0.399	0.509	0.429	0.454	0.431	0.508	0.435	0.44	0.475	0.43	0.449	0.373	0.38	0.502	0.585	0.369	0.46	0.497	0.494	0.392	0.467	0.387	0.539	0.493	0.465	0.533	0.493	0.41	0.528	0.456	0.427	0.46	0.46	0.457	0.614
215.364	0.453	0.484	0.428	0.474	0.396	0.359	0.445	0.369	0.467	0.472	0.411	0.378	0.476	0.384	0.404	0.511	0.439	0.476	0.432	0.527	0.443	0.434	0.446	0.379	0.454	0.371	0.354	0.496	0.615	0.361	0.452	0.464	0.516	0.404	0.476	0.38	0.515	0.496	0.462	0.548	0.492	0.412	0.541	0.474	0.43	0.448	0.473	0.456	0.645
217.785	0.436	0.48	0.417	0.457	0.383	0.381	0.462	0.387	0.455	0.453	0.418	0.389	0.476	0.374	0.397	0.533	0.443	0.469	0.454	0.516	0.445	0.464	0.472	0.427	0.461	0.375	0.37	0.491	0.597	0.363	0.465	0.454	0.499	0.41	0.468	0.387	0.534	0.512	0.468	0.548	0.5	0.412	0.54	0.466	0.443	0.456	0.474	0.45	0.643
220.233	0.423	0.463	0.383	0.401	0.384	0.338	0.422	0.354	0.4	0.434	0.402	0.368	0.444	0.364	0.355	0.481	0.46	0.431	0.392	0.495	0.409	0.38	0.415	0.393	0.387	0.369	0.367	0.473	0.538	0.354	0.442	0.422	0.46	0.397	0.462	0.38	0.497	0.463	0.446	0.513	0.476	0.396	0.494	0.452	0.422	0.433	0.438	0.441	0.59
222.708	0.455	0.485	0.406	0.427	0.393	0.361	0.439	0.369	0.428	0.439	0.417	0.39	0.466	0.369	0.399	0.507	0.45	0.44	0.435	0.515	0.428	0.432	0.459	0.413	0.425	0.375	0.374	0.48	0.619	0.379	0.464	0.474	0.527	0.402	0.464	0.376	0.503	0.503	0.46	0.539	0.49	0.403	0.531	0.477	0.441	0.454	0.463	0.46	0.638
225.174	0.41	0.456	0.38	0.427	0.366	0.357	0.427	0.359	0.407	0.408	0.407	0.376	0.442	0.365	0.375	0.457	0.456	0.42	0.403	0.495	0.411	0.394	0.424	0.403	0.414	0.367	0.366	0.496	0.542	0.36	0.439	0.436	0.443	0.387	0.431	0.368	0.491	0.473	0.453	0.53	0.482	0.395	0.509	0.445	0.408	0.431	0.429	0.432	0.59
227.64	0.424	0.459	0.393	0.403	0.36	0.348	0.401	0.357	0.402	0.413	0.387	0.383	0.43	0.36	0.383	0.469	0.461	0.428	0.404	0.491	0.399	0.396	0.447	0.389	0.401	0.361	0.357	0.446	0.556	0.357	0.429	0.447	0.458	0.395	0.45	0.365	0.487	0.456	0.447	0.518	0.473	0.39	0.507	0.449	0.415	0.437	0.435	0.447	0.585
230.124	0.454	0.485	0.407	0.429	0.382	0.362	0.479	0.383	0.426	0.477	0.423	0.392	0.494	0.375	0.422	0.54	0.474	0.453	0.417	0.513	0.411	0.427	0.457	0.422	0.446	0.379	0.379	0.46	0.594	0.366	0.461	0.469	0.464	0.407	0.466	0.384	0.53	0.493	0.461	0.531	0.498	0.402	0.514	0.479	0.445	0.453	0.464	0.456	0.621
232.573	0.42	0.471	0.399	0.427	0.373	0.36	0.419	0.36	0.407	0.4	0.393	0.381	0.449	0.364	0.376	0.469	0.443	0.411	0.387	0.49	0.412	0.388	0.414	0.376	0.397	0.363	0.359	0.442	0.537	0.352	0.43	0.439	0.449	0.389	0.451	0.369	0.499	0.482	0.45	0.51	0.472	0.398	0.506	0.457	0.422	0.437	0.443	0.446	0.601
234.994	0.444	0.468	0.439	0.448	0.391	0.372	0.45	0.389	0.456	0.456	0.423	0.394	0.487	0.374	0.415	0.499	0.465	0.453	0.442	0.517	0.427	0.442	0.472	0.411	0.415	0.376	0.368	0.479	0.614	0.36	0.463	0.469	0.5	0.399	0.469	0.378	0.516	0.492	0.466	0.569	0.512	0.411	0.545	0.483	0.434	0.453	0.463	0.447	0.629
237.46	0.456	0.476	0.417	0.439	0.383	0.382	0.437	0.377	0.44	0.432	0.407	0.383	0.474	0.369	0.379	0.504	0.467	0.458	0.415	0.523	0.463	0.43	0.475	0.426	0.432	0.378	0.373	0.504	0.656	0.372	0.464	0.476	0.523	0.391	0.467	0.372	0.545	0.5	0.463	0.528	0.486	0.396	0.523	0.479	0.422	0.458	0.452	0.46	0.632
239.863	0.431	0.466	0.395	0.423	0.362	0.357	0.406	0.361	0.384	0.389	0.387	0.383	0.44	0.355	0.373	0.442	0.448	0.412	0.409	0.49	0.405	0.397	0.446	0.391	0.393	0.365	0.37	0.454	0.536	0.358	0.455	0.443	0.478	0.377	0.421	0.359	0.472	0.472	0.451	0.518	0.469	0.388	0.497	0.45	0.416	0.44	0.437	0.439	0.588
242.347	0.424	0.464	0.399	0.421	0.37	0.352	0.419	0.352	0.401	0.405	0.392	0.365	0.451	0.359	0.362	0.465	0.441	0.39	0.396	0.491	0.395	0.37	0.439	0.376	0.384	0.359	0.359	0.422	0.541	0.361	0.421	0.411	0.439	0.385	0.431	0.374	0.484	0.469	0.443	0.515	0.464	0.397	0.504	0.453	0.418	0.435	0.428	0.441	0.598
244.804	0.454	0.469	0.43	0.431	0.397	0.374	0.44	0.377	0.432	0.43	0.425	0.385	0.473	0.375	0.393	0.512	0.468	0.454	0.433	0.524	0.429	0.443	0.481	0.414	0.431	0.381	0.375	0.499	0.626	0.368	0.472	0.468	0.519	0.403	0.483	0.387	0.556	0.491	0.465	0.561	0.51	0.432	0.549	0.47	0.442	0.453	0.455	0.458	0.634
247.234	0.444	0.47	0.43	0.468	0.399	0.365	0.454	0.378	0.439	0.385	0.414	0.386	0.472	0.376	0.397	0.514	0.449	0.426	0.437	0.511	0.454	0.455	0.466	0.452	0.43	0.367	0.372	0.501	0.588	0.364	0.456	0.485	0.495	0.396	0.437	0.383	0.541	0.493	0.462	0.549	0.493	0.407	0.532	0.477	0.441	0.449	0.456	0.454	0.628
249.737	0.431	0.458	0.399	0.409	0.363	0.35	0.425	0.354	0.396	0.417	0.397	0.364	0.431	0.371	0.359	0.444	0.428	0.422	0.389	0.493	0.402	0.411	0.45	0.43	0.39	0.366	0.371	0.447	0.544	0.365	0.448	0.459	0.468	0.377	0.445	0.363	0.468	0.474	0.45	0.525	0.478	0.396	0.499	0.449	0.419	0.429	0.435	0.435	0.584
252.158	0.448	0.479	0.413	0.443	0.377	0.369	0.456	0.378	0.414	0.433	0.41	0.379	0.468	0.376	0.408	0.497	0.46	0.46	0.437	0.526	0.454	0.455	0.491	0.434	0.465	0.376	0.382	0.521	0.616	0.375	0.472	0.476	0.551	0.413	0.462	0.381	0.535	0.477	0.459	0.539	0.49	0.399	0.523	0.473	0.43	0.461	0.451	0.455	0.617
254.669	0.444	0.471	0.427	0.43	0.386	0.373	0.473	0.384	0.41	0.44	0.413	0.385	0.471	0.377	0.392	0.549	0.465	0.442	0.423	0.537	0.466	0.452	0.474	0.429	0.423	0.375	0.374	0.486	0.637	0.368	0.459	0.473	0.539	0.404	0.481	0.382	0.517	0.508	0.47	0.566	0.494	0.408	0.541	0.464	0.429	0.444	0.447	0.445	0.622
257.09	0.411	0.452	0.41	0.419	0.373	0.356	0.402	0.356	0.393	0.415	0.406	0.367	0.439	0.365	0.37	0.455	0.433	0.408	0.413	0.511	0.399	0.395	0.415	0.375	0.385	0.363	0.355	0.453	0.566	0.355	0.431	0.43	0.472	0.377	0.425	0.361	0.482	0.464	0.446	0.506	0.463	0.398	0.505	0.435	0.41	0.43	0.43	0.434	0.59
259.61	0.438	0.47	0.44	0.446	0.374	0.36	0.465	0.374	0.436	0.457	0.417	0.37	0.47	0.369	0.381	0.498	0.463	0.432	0.429	0.521	0.432	0.445	0.481	0.428	0.424	0.373	0.381	0.493	0.605	0.36	0.471	0.481	0.505	0.395	0.453	0.376	0.505	0.495	0.445	0.537	0.496	0.409	0.537	0.469	0.427	0.451	0.458	0.445	0.628
262.013	0.444	0.482	0.427	0.455	0.373	0.367	0.494	0.373	0.436	0.427	0.421	0.374	0.481	0.361	0.387	0.522	0.478	0.451	0.43	0.519	0.435	0.43	0.475	0.425	0.477	0.378	0.371	0.537	0.615	0.358	0.458	0.461	0.51	0.404	0.469	0.385	0.536	0.508	0.451	0.562	0.491	0.417	0.546	0.465	0.43	0.451	0.456	0.446	0.635
264.479	0.422	0.452	0.39	0.409	0.364	0.356	0.428	0.354	0.413	0.426	0.409	0.367	0.439	0.366	0.361	0.46	0.444	0.413	0.388	0.476	0.398	0.4	0.413	0.395	0.409	0.362	0.364	0.442	0.514	0.352	0.437	0.441	0.467	0.391	0.443	0.37	0.509	0.469	0.441	0.515	0.48	0.376	0.498	0.448	0.415	0.427	0.437	0.432	0.59
266.901	0.408	0.453	0.39	0.411	0.361	0.343	0.404	0.345	0.383	0.406	0.399	0.356	0.451	0.359	0.358	0.442	0.421	0.4	0.389	0.469	0.397	0.401	0.406	0.379	0.409	0.356	0.356	0.472	0.518	0.353	0.438	0.404	0.429	0.379	0.439	0.362	0.477	0.461	0.443	0.501	0.484	0.398	0.499	0.444	0.405	0.423	0.432	0.441	0.586
269.304	0.432	0.483	0.404	0.425	0.377	0.362	0.44	0.373	0.434	0.404	0.421	0.378	0.494	0.365	0.41	0.517	0.457	0.432	0.435	0.526	0.434	0.473	0.462	0.432	0.441	0.372	0.375	0.472	0.641	0.377	0.478	0.489	0.496	0.39	0.471	0.38	0.521	0.493	0.46	0.538	0.503	0.408	0.532	0.472	0.433	0.446	0.463	0.452	0.619
271.833	0.448	0.478	0.415	0.451	0.381	0.362	0.461	0.369	0.416	0.457	0.409	0.377	0.503	0.365	0.387	0.506	0.469	0.463	0.421	0.51	0.45	0.442	0.468	0.422	0.435	0.372	0.373	0.488	0.592	0.37	0.463	0.447	0.519	0.398	0.466	0.388	0.548	0.504	0.455	0.535	0.518	0.406	0.527	0.471	0.441	0.447	0.463	0.45	0.639
274.317	0.445	0.484	0.42	0.453	0.378	0.366	0.435	0.383	0.454	0.449	0.428	0.378	0.477	0.37	0.38	0.496	0.473	0.445	0.43	0.528	0.43	0.453	0.459	0.411	0.434	0.366	0.373	0.501	0.574	0.371	0.458	0.474	0.516	0.399	0.469	0.374	0.536	0.51	0.468	0.575	0.504	0.417	0.551	0.474	0.434	0.459	0.471	0.469	0.646
276.783	0.439	0.467	0.414	0.441	0.386	0.368	0.454	0.377	0.463	0.431	0.409	0.388	0.489	0.366	0.391	0.498	0.455	0.453	0.417	0.505	0.435	0.453	0.491	0.438	0.432	0.379	0.386	0.513	0.584	0.364	0.48	0.468	0.501	0.393	0.465	0.376	0.537	0.512	0.471	0.561	0.508	0.423	0.534	0.466	0.428	0.442	0.455	0.447	0.625
279.186	0.451	0.484	0.429	0.453	0.376	0.361	0.425	0.383	0.473	0.425	0.423	0.387	0.474	0.372	0.405	0.485	0.464	0.444	0.431	0.532	0.457	0.438	0.453	0.444	0.436	0.375	0.382	0.467	0.656	0.368	0.475	0.49	0.539	0.391	0.47	0.377	0.518	0.47	0.467	0.57	0.499	0.408	0.542	0.478	0.44	0.452	0.463	0.458	0.647
281.643	0.432	0.461	0.386	0.401	0.36	0.351	0.411	0.36	0.394	0.392	0.39	0.37	0.444	0.365	0.367	0.441	0.438	0.398	0.393	0.476	0.376	0.399	0.419	0.37	0.376	0.36	0.361	0.448	0.538	0.358	0.439	0.43	0.451	0.396	0.448	0.365	0.481	0.47	0.448	0.54	0.483	0.404	0.497	0.449	0.406	0.429	0.443	0.448	0.573
284.056	0.453	0.475	0.418	0.456	0.387	0.363	0.453	0.38	0.472	0.476	0.416	0.383	0.471	0.365	0.374	0.504	0.474	0.467	0.418	0.526	0.421	0.467	0.486	0.446	0.449	0.379	0.38	0.516	0.583	0.38	0.473	0.471	0.52	0.4	0.469	0.378	0.524	0.499	0.452	0.574	0.506	0.41	0.541	0.483	0.44	0.451	0.466	0.464	0.64
286.477	0.437	0.47	0.408	0.453	0.366	0.368	0.454	0.38	0.437	0.412	0.411	0.373	0.484	0.37	0.4	0.514	0.467	0.469	0.435	0.528	0.447	0.459	0.482	0.412	0.436	0.381	0.379	0.51	0.608	0.374	0.477	0.471	0.561	0.392	0.479	0.381	0.528	0.507	0.457	0.557	0.512	0.419	0.535	0.472	0.42	0.45	0.464	0.455	0.629
288.997	0.402	0.459	0.396	0.418	0.374	0.359	0.428	0.365	0.416	0.388	0.4	0.372	0.454	0.373	0.375	0.476	0.45	0.405	0.41	0.497	0.397	0.404	0.429	0.394	0.377	0.353	0.372	0.433	0.536	0.353	0.449	0.439	0.468	0.393	0.429	0.369	0.486	0.48	0.446	0.522	0.475	0.399	0.5	0.448	0.41	0.426	0.436	0.432	0.577
291.463	0.456	0.479	0.42	0.457	0.378	0.36	0.443	0.386	0.443	0.412	0.406	0.372	0.485	0.377	0.416	0.508	0.477	0.441	0.428	0.548	0.445	0.474	0.476	0.412	0.415	0.362	0.381	0.504	0.642	0.357	0.468	0.47	0.5	0.4	0.451	0.381	0.532	0.481	0.458	0.551	0.496	0.401	0.53	0.474	0.436	0.461	0.456	0.449	0.621
293.929	0.426	0.468	0.398	0.432	0.362	0.343	0.4	0.365	0.427	0.4	0.402	0.374	0.452	0.357	0.396	0.463	0.447	0.413	0.398	0.479	0.38	0.407	0.438	0.385	0.418	0.353	0.36	0.449	0.549	0.357	0.446	0.416	0.438	0.391	0.446	0.369	0.492	0.465	0.443	0.531	0.491	0.399	0.511	0.457	0.415	0.431	0.442	0.438	0.593
296.395	0.458	0.488	0.4	0.426	0.397	0.365	0.448	0.384	0.428	0.416	0.429	0.379	0.457	0.383	0.405	0.494	0.491	0.48	0.427	0.521	0.448	0.45	0.47	0.413	0.423	0.373	0.38	0.534	0.666	0.373	0.47	0.489	0.483	0.408	0.478	0.378	0.512	0.503	0.465	0.587	0.517	0.429	0.521	0.47	0.442	0.458	0.462	0.454	0.62
298.852	0.42	0.466	0.391	0.428	0.364	0.339	0.402	0.362	0.408	0.415	0.399	0.366	0.443	0.357	0.376	0.48	0.433	0.418	0.406	0.519	0.4	0.399	0.439	0.389	0.392	0.35	0.362	0.448	0.543	0.354	0.447	0.428	0.476	0.388	0.435	0.366	0.489	0.46	0.443	0.54	0.478	0.407	0.505	0.464	0.415	0.441	0.431	0.444	0.609
301.3	0.471	0.493	0.43	0.466	0.371	0.372	0.459	0.388	0.464	0.443	0.417	0.389	0.468	0.37	0.412	0.509	0.491	0.478	0.431	0.539	0.473	0.442	0.464	0.415	0.492	0.387	0.377	0.509	0.643	0.373	0.475	0.488	0.535	0.404	0.483	0.383	0.532	0.515	0.475	0.572	0.502	0.417	0.533	0.483	0.438	0.453	0.468	0.46	0.638
303.821	0.437	0.463	0.379	0.429	0.377	0.339	0.392	0.355	0.403	0.452	0.406	0.369	0.429	0.354	0.369	0.468	0.449	0.42	0.395	0.491	0.379	0.381	0.443	0.395	0.441	0.356	0.362	0.461	0.519	0.354	0.448	0.425	0.458	0.384	0.449	0.375	0.497	0.476	0.443	0.534	0.489	0.404	0.503	0.456	0.424	0.428	0.441	0.443	0.59
306.287	0.429	0.465	0.387	0.429	0.357	0.338	0.412	0.355	0.442	0.429	0.393	0.37	0.45	0.35	0.37	0.47	0.454	0.427	0.397	0.486	0.409	0.404	0.445	0.401	0.39	0.346	0.371	0.465	0.533	0.358	0.445	0.442	0.491	0.384	0.445	0.369	0.491	0.47	0.45	0.526	0.479	0.39	0.514	0.454	0.417	0.43	0.448	0.44	0.608
308.753	0.431	0.464	0.386	0.436	0.361	0.332	0.407	0.343	0.414	0.422	0.396	0.364	0.438	0.363	0.375	0.464	0.462	0.42	0.41	0.509	0.41	0.412	0.411	0.388	0.371	0.353	0.367	0.456	0.512	0.359	0.443	0.44	0.494	0.392	0.466	0.373	0.483	0.468	0.446	0.524	0.481	0.402	0.507	0.464	0.41	0.439	0.442	0.439	0.594
311.174	0.463	0.488	0.429	0.469	0.398	0.374	0.466	0.388	0.478	0.42	0.431	0.379	0.482	0.378	0.447	0.52	0.491	0.468	0.443	0.525	0.459	0.489	0.479	0.422	0.41	0.376	0.373	0.505	0.594	0.368	0.471	0.501	0.508	0.409	0.484	0.386	0.531	0.521	0.476	0.606	0.521	0.426	0.553	0.48	0.442	0.459	0.475	0.457	0.631
313.676	0.432	0.469	0.4	0.41	0.366	0.335	0.406	0.365	0.435	0.397	0.398	0.368	0.444	0.351	0.366	0.469	0.457	0.44	0.403	0.496	0.389	0.432	0.423	0.384	0.398	0.354	0.373	0.469	0.54	0.368	0.459	0.443	0.461	0.388	0.453	0.372	0.494	0.481	0.461	0.551	0.487	0.402	0.527	0.46	0.414	0.435	0.427	0.447	0.592
316.106	0.456	0.489	0.419	0.446	0.39	0.365	0.462	0.383	0.458	0.435	0.419	0.383	0.469	0.374	0.41	0.539	0.478	0.466	0.433	0.543	0.469	0.464	0.452	0.414	0.449	0.366	0.377	0.523	0.612	0.362	0.491	0.472	0.51	0.402	0.477	0.38	0.545	0.51	0.486	0.588	0.519	0.416	0.557	0.473	0.446	0.46	0.475	0.461	0.647
318.626	0.46	0.486	0.415	0.454	0.374	0.353	0.484	0.387	0.457	0.485	0.419	0.37	0.503	0.373	0.397	0.529	0.497	0.469	0.424	0.524	0.439	0.483	0.463	0.43	0.444	0.368	0.375	0.503	0.623	0.375	0.487	0.49	0.519	0.411	0.483	0.385	0.551	0.525	0.479	0.573	0.503	0.428	0.546	0.483	0.441	0.463	0.465	0.459	0.64
321.012	0.463	0.498	0.413	0.464	0.381	0.352	0.456	0.374	0.454	0.438	0.429	0.372	0.487	0.377	0.392	0.521	0.499	0.529	0.434	0.535	0.472	0.485	0.484	0.436	0.456	0.369	0.386	0.514	0.593	0.378	0.483	0.498	0.528	0.414	0.471	0.384	0.541	0.518	0.475	0.586	0.523	0.435	0.571	0.484	0.449	0.465	0.467	0.457	0.64
323.478	0.456	0.49	0.433	0.481	0.377	0.353	0.471	0.379	0.472	0.444	0.434	0.376	0.498	0.377	0.395	0.534	0.504	0.492	0.421	0.544	0.465	0.462	0.463	0.444	0.443	0.36	0.379	0.514	0.643	0.374	0.48	0.481	0.508	0.407	0.479	0.383	0.528	0.509	0.469	0.597	0.512	0.423	0.561	0.488	0.445	0.454	0.461	0.463	0.636
325.944	0.444	0.491	0.428	0.466	0.385	0.354	0.477	0.384	0.467	0.427	0.426	0.385	0.504	0.369	0.408	0.52	0.502	0.479	0.426	0.548	0.479	0.451	0.48	0.464	0.431	0.359	0.386	0.487	0.614	0.374	0.477	0.49	0.517	0.413	0.459	0.382	0.536	0.515	0.478	0.581	0.509	0.437	0.573	0.477	0.438	0.451	0.469	0.453	0.638
328.401	0.535	0.534	0.524	0.568	0.431	0.433	0.588	0.442	0.578	0.568	0.465	0.422	0.575	0.416	0.489	0.649	0.586	0.582	0.486	0.601	0.591	0.58	0.583	0.51	0.567	0.401	0.42	0.615	0.758	0.407	0.531	0.57	0.625	0.448	0.519	0.421	0.628	0.6	0.518	0.64	0.569	0.474	0.631	0.533	0.509	0.506	0.53	0.495	0.72
330.867	0.416	0.463	0.401	0.442	0.37	0.347	0.43	0.357	0.431	0.407	0.399	0.366	0.452	0.368	0.372	0.475	0.473	0.432	0.405	0.502	0.414	0.446	0.434	0.401	0.397	0.354	0.368	0.474	0.531	0.367	0.462	0.445	0.459	0.393	0.429	0.368	0.485	0.482	0.46	0.545	0.496	0.409	0.529	0.461	0.412	0.437	0.431	0.445	0.594
333.441	0.433	0.473	0.402	0.424	0.375	0.348	0.405	0.364	0.427	0.402	0.403	0.361	0.451	0.366	0.384	0.447	0.459	0.419	0.397	0.503	0.405	0.45	0.42	0.376	0.417	0.349	0.364	0.441	0.547	0.354	0.445	0.418	0.461	0.388	0.452	0.366	0.479	0.468	0.458	0.553	0.497	0.421	0.52	0.463	0.422	0.438	0.444	0.448	0.607
335.916	0.468	0.508	0.436	0.477	0.4	0.367	0.46	0.395	0.466	0.452	0.439	0.384	0.473	0.389	0.426	0.522	0.499	0.465	0.435	0.546	0.446	0.545	0.438	0.413	0.451	0.369	0.377	0.508	0.622	0.373	0.466	0.481	0.534	0.426	0.47	0.384	0.54	0.539	0.474	0.582	0.526	0.422	0.566	0.486	0.457	0.471	0.486	0.472	0.647
338.383	0.436	0.489	0.436	0.468	0.376	0.365	0.472	0.381	0.483	0.422	0.429	0.38	0.487	0.368	0.412	0.531	0.476	0.475	0.431	0.53	0.448	0.538	0.478	0.438	0.472	0.382	0.389	0.517	0.601	0.381	0.489	0.52	0.53	0.412	0.457	0.376	0.518	0.519	0.484	0.571	0.52	0.417	0.544	0.488	0.462	0.46	0.474	0.451	0.639
340.804	0.469	0.496	0.423	0.453	0.394	0.372	0.473	0.395	0.476	0.464	0.425	0.384	0.5	0.377	0.427	0.536	0.492	0.466	0.431	0.558	0.451	0.538	0.47	0.445	0.466	0.367	0.384	0.485	0.607	0.38	0.487	0.478	0.519	0.407	0.469	0.379	0.551	0.522	0.486	0.563	0.522	0.427	0.567	0.49	0.466	0.46	0.488	0.463	0.658
343.333	0.422	0.469	0.392	0.457	0.366	0.344	0.421	0.369	0.43	0.401	0.393	0.367	0.45	0.363	0.384	0.468	0.473	0.431	0.403	0.507	0.419	0.458	0.436	0.41	0.412	0.357	0.372	0.462	0.534	0.376	0.465	0.443	0.48	0.402	0.443	0.371	0.481	0.474	0.477	0.546	0.479	0.41	0.528	0.467	0.431	0.437	0.442	0.44	0.6
345.736	0.455	0.501	0.439	0.47	0.402	0.385	0.496	0.403	0.477	0.472	0.45	0.4	0.496	0.398	0.416	0.501	0.503	0.506	0.435	0.562	0.47	0.574	0.461	0.437	0.454	0.371	0.387	0.491	0.598	0.38	0.477	0.492	0.559	0.414	0.463	0.381	0.52	0.529	0.495	0.577	0.536	0.436	0.568	0.488	0.468	0.463	0.499	0.467	0.665
348.265	0.434	0.478	0.413	0.448	0.361	0.352	0.437	0.374	0.44	0.43	0.401	0.369	0.455	0.373	0.378	0.488	0.496	0.473	0.41	0.533	0.419	0.49	0.435	0.376	0.422	0.35	0.365	0.467	0.56	0.36	0.442	0.443	0.489	0.399	0.439	0.371	0.492	0.479	0.48	0.535	0.49	0.405	0.515	0.466	0.436	0.437	0.457	0.438	0.617
350.749	0.411	0.462	0.401	0.422	0.372	0.347	0.418	0.363	0.433	0.41	0.403	0.374	0.436	0.384	0.399	0.455	0.461	0.42	0.41	0.52	0.418	0.497	0.41	0.395	0.429	0.366	0.375	0.454	0.555	0.361	0.441	0.455	0.482	0.399	0.43	0.361	0.486	0.473	0.472	0.542	0.483	0.407	0.512	0.462	0.416	0.432	0.435	0.436	0.606
353.233	0.436	0.471	0.391	0.42	0.377	0.346	0.43	0.369	0.433	0.401	0.404	0.368	0.466	0.379	0.374	0.489	0.477	0.454	0.411	0.532	0.442	0.493	0.46	0.413	0.411	0.373	0.379	0.47	0.558	0.368	0.456	0.445	0.478	0.41	0.452	0.376	0.484	0.48	0.474	0.551	0.486	0.407	0.52	0.467	0.427	0.439	0.458	0.447	0.608
355.691	0.427	0.477	0.409	0.441	0.37	0.363	0.439	0.366	0.426	0.396	0.409	0.377	0.458	0.375	0.393	0.49	0.463	0.437	0.409	0.496	0.411	0.483	0.437	0.384	0.445	0.363	0.382	0.452	0.552	0.363	0.449	0.447	0.473	0.412	0.459	0.379	0.502	0.495	0.467	0.536	0.502	0.414	0.534	0.467	0.427	0.444	0.455	0.444	0.621
358.157	0.486	0.498	0.436	0.467	0.407	0.374	0.484	0.391	0.491	0.471	0.439	0.405	0.515	0.392	0.45	0.547	0.506	0.495	0.418	0.559	0.487	0.556	0.476	0.414	0.458	0.365	0.388	0.53	0.644	0.377	0.469	0.483	0.529	0.424	0.487	0.39	0.553	0.526	0.484	0.591	0.522	0.429	0.581	0.492	0.467	0.467	0.508	0.461	0.657
360.605	0.463	0.501	0.469	0.467	0.385	0.379	0.466	0.394	0.496	0.441	0.444	0.398	0.483	0.401	0.424	0.527	0.525	0.479	0.442	0.536	0.496	0.587	0.479	0.424	0.481	0.385	0.38	0.546	0.65	0.373	0.471	0.503	0.519	0.422	0.485	0.387	0.532	0.527	0.482	0.596	0.524	0.424	0.582	0.491	0.455	0.466	0.491	0.456	0.677
363.071	0.464	0.496	0.445	0.472	0.407	0.364	0.477	0.39	0.477	0.47	0.453	0.4	0.493	0.408	0.426	0.553	0.504	0.508	0.436	0.563	0.479	0.583	0.483	0.423	0.478	0.386	0.382	0.539	0.595	0.379	0.471	0.506	0.547	0.431	0.495	0.395	0.579	0.491	0.476	0.58	0.53	0.433	0.569	0.483	0.464	0.472	0.503	0.472	0.652
365.51	0.44	0.478	0.407	0.435	0.387	0.365	0.422	0.369	0.463	0.404	0.405	0.375	0.468	0.383	0.376	0.482	0.488	0.455	0.421	0.53	0.453	0.51	0.471	0.399	0.421	0.371	0.387	0.47	0.577	0.375	0.461	0.442	0.483	0.406	0.453	0.373	0.51	0.478	0.463	0.557	0.499	0.412	0.52	0.467	0.432	0.44	0.472	0.445	0.615
368.03	0.453	0.49	0.441	0.491	0.412	0.375	0.499	0.392	0.499	0.431	0.434	0.39	0.481	0.406	0.425	0.519	0.543	0.532	0.434	0.568	0.505	0.58	0.482	0.431	0.481	0.376	0.389	0.545	0.665	0.383	0.491	0.473	0.533	0.429	0.486	0.388	0.567	0.517	0.484	0.576	0.545	0.429	0.576	0.497	0.466	0.473	0.481	0.455	0.671
370.505	0.472	0.492	0.45	0.486	0.394	0.389	0.496	0.384	0.486	0.456	0.43	0.39	0.503	0.396	0.428	0.548	0.528	0.5	0.439	0.558	0.489	0.592	0.48	0.444	0.438	0.382	0.39	0.512	0.654	0.378	0.477	0.493	0.546	0.431	0.493	0.393	0.57	0.509	0.478	0.576	0.513	0.427	0.578	0.488	0.448	0.466	0.488	0.457	0.652
372.981	0.472	0.503	0.422	0.468	0.412	0.387	0.489	0.388	0.482	0.452	0.427	0.391	0.503	0.393	0.399	0.527	0.537	0.545	0.425	0.558	0.498	0.547	0.485	0.428	0.442	0.379	0.399	0.533	0.662	0.384	0.483	0.491	0.538	0.43	0.49	0.395	0.544	0.498	0.482	0.588	0.518	0.419	0.575	0.49	0.453	0.475	0.488	0.467	0.657
375.465	0.483	0.508	0.425	0.46	0.415	0.382	0.506	0.4	0.461	0.444	0.44	0.393	0.498	0.403	0.421	0.57	0.541	0.521	0.442	0.567	0.5	0.564	0.498	0.408	0.476	0.375	0.39	0.541	0.656	0.38	0.488	0.502	0.539	0.44	0.484	0.392	0.559	0.501	0.486	0.606	0.543	0.431	0.57	0.5	0.467	0.466	0.491	0.474	0.657
377.931	0.494	0.503	0.433	0.488	0.417	0.368	0.5	0.396	0.493	0.472	0.433	0.386	0.49	0.403	0.423	0.556	0.543	0.518	0.433	0.558	0.507	0.573	0.545	0.448	0.45	0.383	0.399	0.51	0.651	0.385	0.497	0.503	0.521	0.433	0.479	0.387	0.541	0.513	0.483	0.578	0.548	0.425	0.575	0.506	0.465	0.473	0.484	0.465	0.656
380.415	0.447	0.482	0.416	0.454	0.385	0.365	0.435	0.377	0.459	0.419	0.422	0.386	0.481	0.388	0.4	0.481	0.499	0.44	0.416	0.521	0.425	0.508	0.461	0.415	0.396	0.375	0.391	0.465	0.564	0.375	0.466	0.472	0.497	0.414	0.457	0.38	0.483	0.486	0.467	0.567	0.521	0.421	0.543	0.486	0.441	0.454	0.464	0.456	0.623
382.881	0.442	0.487	0.401	0.438	0.405	0.377	0.447	0.385	0.433	0.405	0.426	0.392	0.484	0.393	0.409	0.464	0.496	0.466	0.401	0.534	0.442	0.505	0.439	0.409	0.4	0.365	0.383	0.465	0.531	0.373	0.44	0.461	0.483	0.431	0.485	0.386	0.51	0.508	0.476	0.581	0.539	0.428	0.559	0.486	0.437	0.45	0.469	0.447	0.607
385.365	0.44	0.472	0.412	0.425	0.388	0.36	0.431	0.364	0.431	0.42	0.406	0.379	0.469	0.388	0.39	0.488	0.508	0.459	0.412	0.521	0.411	0.526	0.442	0.385	0.38	0.361	0.377	0.456	0.573	0.364	0.449	0.456	0.47	0.415	0.438	0.374	0.483	0.487	0.466	0.549	0.507	0.413	0.522	0.479	0.429	0.454	0.459	0.45	0.61
387.786	0.477	0.507	0.443	0.485	0.388	0.389	0.504	0.402	0.467	0.444	0.438	0.404	0.515	0.398	0.433	0.564	0.548	0.539	0.442	0.571	0.5	0.596	0.506	0.414	0.463	0.381	0.391	0.569	0.657	0.374	0.468	0.494	0.55	0.438	0.487	0.388	0.554	0.515	0.494	0.575	0.523	0.419	0.577	0.509	0.461	0.481	0.483	0.466	0.658
390.271	0.451	0.488	0.439	0.469	0.406	0.361	0.451	0.379	0.454	0.44	0.419	0.385	0.493	0.38	0.4	0.506	0.493	0.469	0.418	0.543	0.436	0.525	0.433	0.389	0.425	0.364	0.379	0.473	0.573	0.368	0.46	0.448	0.509	0.434	0.451	0.379	0.516	0.485	0.475	0.565	0.517	0.419	0.537	0.49	0.441	0.449	0.45	0.442	0.629
392.701	0.511	0.516	0.457	0.498	0.431	0.376	0.505	0.399	0.501	0.468	0.444	0.395	0.531	0.403	0.423	0.586	0.585	0.536	0.449	0.591	0.482	0.632	0.511	0.453	0.455	0.387	0.406	0.525	0.654	0.398	0.497	0.514	0.597	0.462	0.517	0.398	0.563	0.522	0.49	0.623	0.531	0.44	0.571	0.508	0.459	0.473	0.488	0.464	0.674
395.14	0.454	0.487	0.427	0.454	0.419	0.36	0.463	0.381	0.455	0.443	0.421	0.393	0.48	0.392	0.401	0.507	0.503	0.473	0.424	0.545	0.433	0.546	0.457	0.412	0.441	0.363	0.393	0.509	0.557	0.372	0.462	0.449	0.485	0.43	0.439	0.378	0.522	0.489	0.474	0.563	0.521	0.42	0.543	0.484	0.43	0.455	0.463	0.448	0.617
397.669	0.493	0.522	0.459	0.5	0.436	0.392	0.529	0.412	0.512	0.507	0.452	0.404	0.532	0.412	0.439	0.562	0.556	0.524	0.45	0.583	0.514	0.647	0.514	0.432	0.47	0.388	0.415	0.567	0.62	0.393	0.502	0.531	0.575	0.455	0.509	0.4	0.544	0.547	0.499	0.575	0.548	0.428	0.576	0.519	0.474	0.482	0.497	0.471	0.679
400.171	0.471	0.505	0.432	0.472	0.421	0.378	0.45	0.39	0.474	0.466	0.423	0.392	0.473	0.405	0.421	0.491	0.521	0.491	0.42	0.559	0.469	0.517	0.478	0.429	0.463	0.374	0.396	0.482	0.577	0.381	0.462	0.465	0.511	0.426	0.455	0.388	0.495	0.496	0.474	0.569	0.519	0.413	0.531	0.487	0.457	0.464	0.462	0.45	0.629
402.61	0.502	0.523	0.485	0.508	0.44	0.405	0.509	0.407	0.512	0.484	0.456	0.42	0.511	0.41	0.466	0.56	0.555	0.512	0.455	0.571	0.507	0.644	0.519	0.467	0.479	0.393	0.431	0.542	0.616	0.395	0.484	0.5	0.542	0.466	0.49	0.405	0.571	0.542	0.506	0.604	0.572	0.441	0.595	0.524	0.466	0.483	0.494	0.459	0.683
405.094	0.483	0.505	0.427	0.448	0.419	0.372	0.461	0.383	0.464	0.447	0.434	0.392	0.497	0.405	0.403	0.49	0.536	0.498	0.428	0.548	0.443	0.536	0.448	0.423	0.441	0.366	0.391	0.49	0.604	0.379	0.454	0.466	0.504	0.444	0.462	0.388	0.505	0.495	0.479	0.586	0.517	0.416	0.545	0.489	0.453	0.464	0.476	0.464	0.638
407.579	0.478	0.5	0.458	0.447	0.412	0.377	0.44	0.388	0.492	0.462	0.431	0.399	0.483	0.401	0.401	0.487	0.524	0.472	0.422	0.526	0.462	0.55	0.469	0.423	0.428	0.376	0.396	0.493	0.583	0.371	0.465	0.463	0.505	0.442	0.457	0.387	0.493	0.507	0.476	0.58	0.528	0.401	0.542	0.499	0.437	0.457	0.466	0.457	0.643
410.045	0.524	0.529	0.495	0.496	0.429	0.395	0.525	0.418	0.484	0.479	0.453	0.419	0.531	0.399	0.444	0.568	0.56	0.551	0.46	0.59	0.508	0.651	0.516	0.433	0.463	0.391	0.415	0.556	0.69	0.39	0.503	0.519	0.557	0.476	0.519	0.405	0.575	0.542	0.498	0.626	0.541	0.442	0.588	0.512	0.472	0.495	0.505	0.479	0.674
412.511	0.455	0.504	0.425	0.468	0.408	0.38	0.462	0.393	0.493	0.437	0.441	0.405	0.498	0.403	0.401	0.495	0.515	0.478	0.428	0.555	0.444	0.593	0.459	0.401	0.436	0.373	0.392	0.493	0.559	0.388	0.468	0.473	0.489	0.453	0.455	0.394	0.512	0.492	0.49	0.577	0.525	0.438	0.549	0.496	0.443	0.457	0.476	0.451	0.63
415.058	0.473	0.507	0.461	0.484	0.422	0.369	0.478	0.4	0.482	0.446	0.443	0.41	0.493	0.404	0.404	0.507	0.526	0.46	0.436	0.57	0.478	0.544	0.469	0.409	0.431	0.37	0.396	0.493	0.567	0.379	0.471	0.456	0.477	0.452	0.473	0.396	0.509	0.515	0.496	0.587	0.52	0.433	0.558	0.497	0.455	0.464	0.476	0.459	0.637
417.578	0.463	0.506	0.447	0.48	0.4	0.366	0.467	0.398	0.468	0.451	0.447	0.406	0.522	0.402	0.4	0.487	0.506	0.489	0.43	0.552	0.471	0.587	0.42	0.39	0.431	0.38	0.39	0.459	0.578	0.374	0.459	0.449	0.525	0.456	0.483	0.399	0.505	0.515	0.492	0.577	0.517	0.421	0.554	0.495	0.44	0.457	0.476	0.456	0.639
420.008	0.525	0.538	0.496	0.523	0.438	0.411	0.548	0.436	0.539	0.498	0.479	0.435	0.571	0.427	0.482	0.571	0.587	0.59	0.453	0.582	0.533	0.649	0.56	0.471	0.51	0.397	0.428	0.569	0.694	0.405	0.497	0.521	0.591	0.479	0.525	0.412	0.582	0.559	0.508	0.602	0.561	0.438	0.599	0.533	0.509	0.497	0.513	0.484	0.689
422.51	0.474	0.505	0.444	0.482	0.424	0.386	0.464	0.408	0.472	0.435	0.456	0.409	0.494	0.412	0.427	0.509	0.51	0.483	0.431	0.546	0.464	0.573	0.475	0.406	0.456	0.377	0.396	0.445	0.516	0.384	0.464	0.47	0.468	0.461	0.46	0.405	0.503	0.496	0.486	0.592	0.566	0.427	0.541	0.503	0.449	0.469	0.479	0.466	0.631
424.95	0.469	0.51	0.465	0.489	0.428	0.387	0.478	0.405	0.501	0.502	0.458	0.414	0.514	0.402	0.419	0.525	0.503	0.512	0.427	0.552	0.474	0.558	0.466	0.419	0.492	0.398	0.403	0.491	0.615	0.388	0.477	0.465	0.552	0.467	0.473	0.401	0.522	0.514	0.498	0.582	0.529	0.422	0.569	0.521	0.479	0.462	0.485	0.451	0.658
427.461	0.483	0.505	0.44	0.488	0.438	0.393	0.449	0.402	0.488	0.468	0.447	0.415	0.496	0.4	0.437	0.518	0.542	0.521	0.446	0.566	0.487	0.58	0.486	0.396	0.454	0.38	0.41	0.507	0.593	0.397	0.475	0.477	0.528	0.465	0.471	0.405	0.521	0.518	0.502	0.589	0.529	0.429	0.566	0.505	0.445	0.461	0.477	0.465	0.633
429.9	0.483	0.52	0.451	0.493	0.424	0.387	0.49	0.395	0.49	0.454	0.454	0.414	0.519	0.408	0.402	0.517	0.532	0.507	0.447	0.563	0.465	0.593	0.479	0.383	0.433	0.381	0.409	0.473	0.571	0.396	0.483	0.469	0.529	0.484	0.488	0.404	0.526	0.502	0.503	0.615	0.534	0.446	0.572	0.51	0.468	0.469	0.485	0.472	0.635
432.33	0.493	0.52	0.471	0.511	0.444	0.407	0.489	0.402	0.492	0.49	0.46	0.426	0.529	0.409	0.426	0.516	0.538	0.494	0.439	0.549	0.475	0.589	0.473	0.412	0.43	0.38	0.408	0.502	0.603	0.396	0.495	0.481	0.519	0.485	0.492	0.408	0.52	0.523	0.507	0.592	0.543	0.43	0.573	0.517	0.483	0.474	0.491	0.464	0.654
434.832	0.499	0.523	0.458	0.502	0.441	0.399	0.483	0.419	0.479	0.463	0.463	0.424	0.525	0.419	0.445	0.517	0.562	0.522	0.449	0.567	0.488	0.591	0.502	0.41	0.433	0.396	0.43	0.514	0.604	0.393	0.493	0.493	0.531	0.477	0.493	0.411	0.557	0.511	0.505	0.588	0.555	0.423	0.578	0.516	0.468	0.478	0.484	0.472	0.651
437.316	0.522	0.545	0.5	0.565	0.485	0.408	0.554	0.429	0.542	0.516	0.494	0.431	0.561	0.436	0.49	0.573	0.598	0.606	0.475	0.605	0.523	0.678	0.573	0.445	0.581	0.401	0.445	0.607	0.633	0.413	0.53	0.55	0.602	0.513	0.539	0.433	0.567	0.554	0.523	0.699	0.568	0.469	0.645	0.557	0.498	0.486	0.525	0.478	0.714
439.8	0.515	0.534	0.475	0.519	0.438	0.399	0.506	0.413	0.519	0.467	0.483	0.43	0.514	0.419	0.439	0.54	0.555	0.536	0.445	0.56	0.492	0.635	0.5	0.421	0.433	0.384	0.423	0.51	0.603	0.406	0.494	0.479	0.543	0.489	0.512	0.415	0.546	0.527	0.504	0.594	0.541	0.432	0.582	0.536	0.469	0.474	0.518	0.466	0.653
442.285	0.514	0.533	0.479	0.525	0.427	0.403	0.483	0.406	0.475	0.478	0.465	0.425	0.52	0.418	0.412	0.533	0.552	0.535	0.447	0.56	0.495	0.607	0.497	0.428	0.433	0.396	0.42	0.53	0.596	0.401	0.498	0.489	0.552	0.49	0.492	0.42	0.548	0.504	0.502	0.613	0.533	0.432	0.587	0.521	0.47	0.479	0.507	0.47	0.659
444.706	0.5	0.527	0.457	0.51	0.432	0.401	0.52	0.417	0.51	0.48	0.47	0.428	0.554	0.424	0.422	0.542	0.556	0.548	0.449	0.56	0.482	0.628	0.499	0.411	0.489	0.398	0.426	0.535	0.577	0.399	0.502	0.513	0.522	0.493	0.511	0.423	0.547	0.548	0.514	0.598	0.553	0.429	0.574	0.53	0.477	0.466	0.511	0.47	0.659
447.199	0.584	0.552	0.486	0.519	0.46	0.432	0.594	0.453	0.516	0.487	0.502	0.445	0.569	0.459	0.505	0.626	0.594	0.602	0.476	0.632	0.546	0.721	0.582	0.472	0.489	0.417	0.45	0.636	0.726	0.421	0.532	0.545	0.67	0.518	0.541	0.434	0.609	0.562	0.522	0.639	0.585	0.453	0.611	0.549	0.516	0.498	0.524	0.492	0.734
449.701	0.504	0.53	0.483	0.5	0.43	0.392	0.508	0.424	0.495	0.481	0.471	0.43	0.54	0.417	0.443	0.525	0.573	0.545	0.463	0.558	0.505	0.628	0.522	0.467	0.437	0.391	0.425	0.492	0.541	0.404	0.5	0.502	0.534	0.494	0.508	0.413	0.52	0.523	0.519	0.61	0.559	0.442	0.588	0.535	0.485	0.47	0.506	0.475	0.679
452.266	0.538	0.536	0.464	0.529	0.422	0.402	0.523	0.415	0.514	0.465	0.466	0.43	0.525	0.435	0.446	0.545	0.565	0.523	0.457	0.565	0.489	0.619	0.484	0.411	0.441	0.409	0.434	0.562	0.596	0.405	0.496	0.525	0.561	0.512	0.511	0.425	0.542	0.526	0.51	0.607	0.526	0.436	0.584	0.525	0.488	0.486	0.509	0.488	0.669
454.687	0.575	0.555	0.52	0.572	0.465	0.435	0.585	0.438	0.557	0.511	0.497	0.434	0.588	0.452	0.467	0.633	0.643	0.643	0.489	0.624	0.572	0.787	0.532	0.467	0.482	0.411	0.466	0.642	0.713	0.417	0.536	0.558	0.571	0.534	0.547	0.442	0.644	0.552	0.535	0.653	0.558	0.449	0.649	0.556	0.514	0.508	0.54	0.485	0.733
457.234	0.506	0.534	0.466	0.484	0.441	0.424	0.514	0.424	0.5	0.484	0.486	0.434	0.52	0.442	0.47	0.548	0.589	0.515	0.462	0.583	0.511	0.66	0.481	0.427	0.489	0.401	0.439	0.554	0.608	0.41	0.493	0.503	0.549	0.519	0.494	0.424	0.526	0.533	0.519	0.611	0.567	0.433	0.582	0.521	0.49	0.487	0.503	0.486	0.658
459.8	0.511	0.536	0.487	0.52	0.443	0.425	0.51	0.447	0.501	0.474	0.48	0.426	0.539	0.438	0.48	0.521	0.573	0.568	0.462	0.586	0.521	0.624	0.514	0.454	0.448	0.392	0.44	0.547	0.611	0.406	0.5	0.514	0.554	0.514	0.503	0.415	0.516	0.546	0.522	0.619	0.544	0.442	0.579	0.537	0.484	0.484	0.493	0.478	0.663
462.302	0.58	0.567	0.558	0.599	0.475	0.456	0.597	0.474	0.603	0.565	0.498	0.441	0.609	0.451	0.511	0.639	0.647	0.623	0.511	0.637	0.607	0.766	0.586	0.467	0.535	0.426	0.454	0.62	0.697	0.432	0.533	0.588	0.638	0.527	0.533	0.449	0.596	0.606	0.547	0.684	0.584	0.47	0.649	0.581	0.528	0.513	0.553	0.498	0.755
464.75	0.53	0.541	0.48	0.531	0.465	0.429	0.549	0.44	0.487	0.499	0.469	0.437	0.575	0.436	0.462	0.533	0.589	0.578	0.469	0.569	0.535	0.668	0.495	0.435	0.501	0.417	0.437	0.544	0.614	0.409	0.516	0.514	0.586	0.517	0.513	0.426	0.551	0.555	0.542	0.636	0.544	0.437	0.589	0.542	0.517	0.506	0.536	0.479	0.671
467.252	0.526	0.549	0.488	0.518	0.457	0.424	0.544	0.422	0.498	0.497	0.478	0.426	0.545	0.452	0.453	0.555	0.594	0.541	0.469	0.582	0.475	0.676	0.524	0.427	0.481	0.403	0.445	0.492	0.601	0.408	0.524	0.511	0.536	0.521	0.507	0.435	0.535	0.54	0.528	0.624	0.531	0.45	0.597	0.555	0.505	0.49	0.539	0.481	0.669
469.691	0.545	0.548	0.497	0.548	0.451	0.434	0.554	0.427	0.508	0.494	0.493	0.419	0.551	0.446	0.449	0.558	0.588	0.549	0.477	0.556	0.511	0.662	0.52	0.449	0.503	0.406	0.442	0.538	0.649	0.41	0.516	0.524	0.553	0.522	0.499	0.432	0.559	0.557	0.534	0.649	0.544	0.456	0.613	0.546	0.487	0.497	0.525	0.486	0.674
472.175	0.533	0.549	0.502	0.556	0.463	0.413	0.505	0.435	0.527	0.502	0.494	0.434	0.563	0.454	0.488	0.545	0.584	0.589	0.473	0.575	0.512	0.679	0.54	0.452	0.512	0.414	0.453	0.583	0.626	0.417	0.537	0.514	0.524	0.519	0.502	0.427	0.521	0.547	0.531	0.629	0.563	0.454	0.618	0.555	0.497	0.497	0.522	0.484	0.67
474.605	0.534	0.549	0.496	0.551	0.465	0.422	0.498	0.435	0.515	0.511	0.501	0.434	0.548	0.462	0.458	0.53	0.588	0.59	0.479	0.567	0.51	0.689	0.529	0.469	0.514	0.42	0.459	0.543	0.603	0.427	0.54	0.518	0.561	0.522	0.521	0.431	0.539	0.547	0.533	0.647	0.563	0.458	0.62	0.555	0.493	0.495	0.519	0.489	0.656
477.063	0.523	0.551	0.494	0.544	0.461	0.427	0.529	0.446	0.514	0.506	0.493	0.439	0.567	0.463	0.49	0.548	0.588	0.569	0.491	0.598	0.553	0.715	0.522	0.437	0.469	0.405	0.461	0.541	0.63	0.42	0.522	0.532	0.567	0.531	0.514	0.421	0.533	0.549	0.542	0.646	0.574	0.435	0.61	0.55	0.517	0.497	0.524	0.484	0.666
479.574	0.533	0.529	0.499	0.537	0.479	0.435	0.492	0.45	0.519	0.501	0.499	0.431	0.529	0.46	0.465	0.543	0.592	0.585	0.484	0.612	0.537	0.639	0.534	0.464	0.535	0.412	0.456	0.554	0.629	0.435	0.537	0.515	0.544	0.512	0.524	0.429	0.524	0.562	0.547	0.649	0.549	0.454	0.604	0.544	0.489	0.49	0.512	0.476	0.662
482.076	0.558	0.547	0.507	0.548	0.462	0.431	0.525	0.452	0.56	0.51	0.501	0.439	0.546	0.473	0.473	0.554	0.6	0.539	0.481	0.596	0.542	0.629	0.567	0.465	0.492	0.413	0.465	0.52	0.631	0.425	0.536	0.507	0.557	0.53	0.508	0.435	0.554	0.572	0.549	0.66	0.569	0.465	0.624	0.564	0.506	0.509	0.531	0.494	0.666
484.506	0.556	0.546	0.523	0.547	0.458	0.435	0.556	0.456	0.549	0.519	0.507	0.437	0.599	0.463	0.476	0.562	0.619	0.594	0.492	0.594	0.582	0.699	0.55	0.445	0.5	0.406	0.456	0.567	0.651	0.444	0.549	0.522	0.588	0.532	0.54	0.446	0.556	0.573	0.554	0.652	0.547	0.455	0.622	0.568	0.5	0.501	0.526	0.497	0.668
487.008	0.535	0.548	0.521	0.58	0.463	0.427	0.557	0.452	0.527	0.524	0.495	0.448	0.583	0.458	0.464	0.601	0.612	0.582	0.493	0.592	0.548	0.645	0.513	0.438	0.501	0.418	0.454	0.56	0.644	0.43	0.532	0.519	0.548	0.533	0.532	0.45	0.577	0.57	0.56	0.665	0.565	0.471	0.63	0.572	0.499	0.5	0.52	0.487	0.687
489.447	0.537	0.552	0.52	0.545	0.477	0.437	0.555	0.459	0.529	0.52	0.503	0.455	0.594	0.482	0.495	0.574	0.623	0.592	0.484	0.567	0.544	0.672	0.551	0.456	0.571	0.427	0.474	0.552	0.64	0.441	0.551	0.525	0.558	0.524	0.528	0.448	0.571	0.572	0.564	0.671	0.565	0.444	0.633	0.573	0.518	0.512	0.53	0.488	0.664
491.949	0.525	0.55	0.521	0.559	0.458	0.419	0.528	0.447	0.546	0.489	0.499	0.432	0.557	0.469	0.493	0.528	0.607	0.559	0.477	0.597	0.555	0.603	0.521	0.417	0.488	0.412	0.463	0.578	0.657	0.425	0.524	0.518	0.565	0.538	0.522	0.447	0.547	0.561	0.558	0.671	0.542	0.458	0.632	0.573	0.505	0.513	0.537	0.48	0.691
494.398	0.568	0.568	0.545	0.542	0.478	0.443	0.541	0.469	0.55	0.517	0.506	0.453	0.576	0.469	0.478	0.555	0.627	0.6	0.483	0.581	0.536	0.65	0.536	0.425	0.509	0.41	0.46	0.577	0.635	0.444	0.516	0.526	0.569	0.547	0.527	0.456	0.554	0.583	0.575	0.69	0.568	0.462	0.636	0.579	0.524	0.52	0.529	0.497	0.692
496.9	0.553	0.567	0.502	0.528	0.488	0.456	0.572	0.465	0.563	0.516	0.525	0.445	0.574	0.48	0.511	0.572	0.617	0.603	0.497	0.576	0.53	0.657	0.537	0.451	0.538	0.42	0.461	0.567	0.648	0.443	0.524	0.536	0.575	0.543	0.517	0.456	0.543	0.568	0.56	0.681	0.559	0.459	0.627	0.573	0.518	0.528	0.542	0.489	0.679
499.33	0.553	0.571	0.503	0.547	0.486	0.443	0.561	0.452	0.542	0.534	0.512	0.453	0.588	0.467	0.487	0.572	0.625	0.583	0.485	0.593	0.549	0.679	0.558	0.463	0.487	0.408	0.461	0.574	0.628	0.434	0.526	0.528	0.558	0.546	0.529	0.455	0.567	0.567	0.568	0.677	0.576	0.47	0.617	0.586	0.52	0.514	0.543	0.492	0.687
501.877	0.556	0.571	0.507	0.553	0.45	0.43	0.526	0.447	0.553	0.493	0.492	0.45	0.572	0.468	0.487	0.578	0.603	0.596	0.498	0.602	0.561	0.7	0.554	0.46	0.498	0.422	0.469	0.572	0.656	0.448	0.538	0.531	0.551	0.534	0.529	0.449	0.565	0.556	0.561	0.683	0.546	0.464	0.631	0.566	0.527	0.532	0.53	0.493	0.677
504.415	0.579	0.573	0.522	0.567	0.492	0.429	0.57	0.455	0.55	0.544	0.52	0.45	0.591	0.474	0.532	0.571	0.631	0.602	0.492	0.582	0.545	0.708	0.534	0.454	0.484	0.419	0.48	0.57	0.66	0.444	0.542	0.543	0.566	0.556	0.568	0.467	0.577	0.549	0.568	0.68	0.575	0.455	0.618	0.584	0.523	0.534	0.537	0.497	0.689
506.845	0.573	0.582	0.519	0.54	0.486	0.432	0.562	0.459	0.571	0.541	0.516	0.453	0.593	0.471	0.513	0.566	0.616	0.582	0.492	0.594	0.577	0.658	0.546	0.45	0.512	0.433	0.484	0.569	0.648	0.456	0.561	0.525	0.58	0.544	0.539	0.456	0.562	0.582	0.563	0.662	0.561	0.475	0.626	0.582	0.519	0.533	0.534	0.495	0.689
509.347	0.636	0.6	0.582	0.608	0.505	0.457	0.608	0.488	0.61	0.598	0.533	0.462	0.663	0.494	0.523	0.618	0.685	0.637	0.548	0.629	0.624	0.839	0.68	0.505	0.598	0.453	0.492	0.624	0.675	0.472	0.611	0.622	0.652	0.574	0.566	0.472	0.618	0.622	0.585	0.744	0.578	0.513	0.701	0.628	0.564	0.556	0.578	0.526	0.751
511.787	0.563	0.575	0.548	0.61	0.483	0.439	0.539	0.474	0.564	0.532	0.506	0.454	0.594	0.472	0.509	0.536	0.648	0.598	0.5	0.585	0.578	0.685	0.545	0.414	0.531	0.423	0.479	0.533	0.628	0.446	0.542	0.528	0.578	0.573	0.541	0.459	0.545	0.565	0.575	0.667	0.572	0.47	0.661	0.593	0.53	0.54	0.541	0.489	0.675
514.28	0.577	0.577	0.523	0.566	0.485	0.444	0.549	0.466	0.56	0.533	0.521	0.451	0.618	0.475	0.522	0.564	0.635	0.604	0.518	0.605	0.574	0.7	0.584	0.463	0.563	0.437	0.479	0.621	0.659	0.455	0.556	0.533	0.571	0.562	0.558	0.464	0.595	0.582	0.565	0.662	0.575	0.464	0.652	0.601	0.537	0.548	0.554	0.501	0.69
516.719	0.556	0.579	0.522	0.558	0.476	0.451	0.572	0.465	0.545	0.506	0.513	0.459	0.604	0.475	0.484	0.576	0.638	0.605	0.519	0.593	0.558	0.701	0.577	0.461	0.56	0.442	0.482	0.591	0.618	0.468	0.561	0.54	0.569	0.558	0.549	0.464	0.561	0.578	0.568	0.66	0.562	0.471	0.632	0.6	0.522	0.539	0.538	0.486	0.653
519.221	0.585	0.573	0.528	0.57	0.486	0.459	0.566	0.489	0.557	0.516	0.523	0.461	0.572	0.486	0.512	0.563	0.64	0.605	0.528	0.601	0.561	0.728	0.569	0.449	0.511	0.436	0.478	0.571	0.661	0.457	0.536	0.574	0.609	0.57	0.541	0.465	0.563	0.567	0.565	0.687	0.579	0.485	0.633	0.584	0.501	0.533	0.531	0.491	0.657
521.669	0.565	0.576	0.536	0.538	0.481	0.432	0.555	0.475	0.545	0.555	0.506	0.459	0.578	0.491	0.509	0.547	0.641	0.58	0.512	0.61	0.625	0.684	0.556	0.464	0.496	0.423	0.482	0.583	0.648	0.456	0.553	0.546	0.575	0.57	0.561	0.457	0.543	0.597	0.57	0.681	0.579	0.484	0.637	0.588	0.529	0.542	0.541	0.488	0.672
524.171	0.579	0.578	0.542	0.564	0.472	0.472	0.553	0.492	0.543	0.519	0.525	0.473	0.59	0.491	0.522	0.569	0.648	0.625	0.515	0.596	0.596	0.687	0.544	0.485	0.571	0.436	0.489	0.558	0.653	0.46	0.562	0.552	0.582	0.565	0.545	0.47	0.591	0.576	0.574	0.69	0.572	0.485	0.634	0.615	0.536	0.54	0.561	0.5	0.677
526.61	0.616	0.599	0.524	0.55	0.475	0.457	0.583	0.494	0.563	0.524	0.512	0.467	0.599	0.483	0.484	0.563	0.649	0.606	0.525	0.604	0.588	0.729	0.586	0.463	0.495	0.421	0.498	0.617	0.628	0.459	0.556	0.537	0.606	0.56	0.556	0.481	0.579	0.591	0.582	0.674	0.555	0.485	0.628	0.615	0.53	0.542	0.538	0.498	0.675
529.122	0.653	0.635	0.664	0.684	0.537	0.513	0.717	0.564	0.695	0.642	0.581	0.512	0.718	0.525	0.617	0.706	0.761	0.751	0.58	0.669	0.712	0.821	0.67	0.579	0.711	0.486	0.527	0.729	0.779	0.498	0.633	0.67	0.69	0.609	0.606	0.511	0.697	0.681	0.619	0.742	0.621	0.534	0.718	0.687	0.59	0.578	0.614	0.536	0.781
531.561	0.587	0.595	0.525	0.582	0.483	0.474	0.559	0.488	0.567	0.541	0.516	0.482	0.598	0.474	0.537	0.575	0.659	0.634	0.526	0.607	0.589	0.706	0.496	0.406	0.523	0.438	0.485	0.551	0.643	0.465	0.552	0.539	0.578	0.575	0.585	0.478	0.589	0.588	0.58	0.663	0.579	0.489	0.644	0.608	0.528	0.539	0.532	0.497	0.666
534.108	0.587	0.593	0.547	0.581	0.48	0.432	0.576	0.496	0.562	0.522	0.526	0.475	0.63	0.503	0.515	0.585	0.651	0.641	0.532	0.599	0.617	0.747	0.596	0.473	0.527	0.447	0.506	0.591	0.649	0.471	0.573	0.6	0.588	0.589	0.579	0.48	0.573	0.583	0.587	0.689	0.587	0.477	0.631	0.614	0.528	0.533	0.542	0.503	0.673
536.655	0.584	0.582	0.55	0.588	0.494	0.459	0.582	0.479	0.568	0.538	0.537	0.482	0.6	0.493	0.516	0.563	0.66	0.615	0.536	0.607	0.602	0.726	0.596	0.458	0.537	0.434	0.502	0.574	0.627	0.47	0.565	0.582	0.598	0.57	0.547	0.471	0.567	0.594	0.58	0.701	0.591	0.496	0.644	0.633	0.516	0.527	0.538	0.491	0.671
539.094	0.584	0.605	0.529	0.566	0.472	0.462	0.553	0.497	0.554	0.538	0.535	0.48	0.629	0.494	0.527	0.567	0.655	0.638	0.522	0.595	0.557	0.723	0.571	0.469	0.537	0.433	0.505	0.578	0.626	0.469	0.565	0.579	0.572	0.589	0.562	0.481	0.583	0.59	0.584	0.666	0.58	0.47	0.631	0.623	0.532	0.548	0.554	0.509	0.679
541.668	0.595	0.605	0.549	0.558	0.483	0.462	0.609	0.496	0.565	0.513	0.521	0.477	0.601	0.493	0.523	0.595	0.642	0.665	0.53	0.604	0.596	0.77	0.594	0.511	0.532	0.459	0.521	0.612	0.626	0.48	0.583	0.569	0.602	0.583	0.586	0.481	0.588	0.606	0.598	0.678	0.585	0.481	0.64	0.62	0.532	0.546	0.551	0.51	0.676
544.188	0.597	0.599	0.552	0.599	0.487	0.45	0.584	0.49	0.572	0.565	0.542	0.477	0.605	0.513	0.532	0.573	0.646	0.605	0.517	0.595	0.575	0.719	0.558	0.462	0.533	0.446	0.512	0.593	0.62	0.468	0.574	0.606	0.549	0.572	0.566	0.482	0.577	0.57	0.584	0.687	0.575	0.494	0.645	0.635	0.535	0.562	0.559	0.511	0.688
546.637	0.581	0.589	0.54	0.574	0.492	0.472	0.548	0.499	0.554	0.529	0.539	0.49	0.611	0.498	0.517	0.578	0.675	0.629	0.546	0.635	0.593	0.769	0.588	0.49	0.524	0.456	0.511	0.584	0.697	0.47	0.541	0.58	0.577	0.58	0.575	0.487	0.563	0.597	0.604	0.707	0.588	0.484	0.653	0.627	0.532	0.55	0.552	0.509	0.677
549.139	0.615	0.605	0.527	0.591	0.475	0.465	0.585	0.502	0.6	0.56	0.525	0.482	0.641	0.496	0.531	0.596	0.669	0.634	0.542	0.635	0.582	0.726	0.586	0.446	0.547	0.445	0.5	0.591	0.652	0.468	0.548	0.567	0.6	0.57	0.548	0.476	0.583	0.604	0.597	0.698	0.589	0.485	0.632	0.637	0.545	0.548	0.572	0.506	0.701
551.587	0.555	0.588	0.551	0.588	0.489	0.482	0.558	0.496	0.569	0.564	0.542	0.48	0.605	0.491	0.529	0.59	0.673	0.64	0.54	0.647	0.641	0.726	0.578	0.46	0.58	0.458	0.502	0.589	0.624	0.473	0.552	0.541	0.632	0.59	0.559	0.483	0.612	0.615	0.612	0.705	0.59	0.49	0.643	0.631	0.527	0.53	0.55	0.507	0.686
554.089	0.597	0.606	0.529	0.581	0.498	0.458	0.57	0.494	0.553	0.582	0.561	0.475	0.604	0.506	0.525	0.594	0.703	0.68	0.532	0.631	0.634	0.713	0.554	0.471	0.539	0.462	0.517	0.603	0.648	0.473	0.568	0.533	0.58	0.579	0.581	0.481	0.596	0.582	0.594	0.715	0.606	0.495	0.663	0.633	0.525	0.548	0.565	0.51	0.695
556.528	0.574	0.598	0.545	0.571	0.493	0.45	0.557	0.486	0.587	0.587	0.527	0.478	0.601	0.495	0.519	0.618	0.701	0.663	0.546	0.618	0.609	0.767	0.629	0.483	0.546	0.463	0.52	0.59	0.646	0.476	0.58	0.588	0.641	0.585	0.596	0.488	0.583	0.608	0.598	0.691	0.591	0.492	0.651	0.628	0.546	0.537	0.582	0.5	0.685
559.093	0.565	0.603	0.529	0.595	0.475	0.453	0.565	0.505	0.588	0.552	0.539	0.488	0.625	0.492	0.515	0.586	0.667	0.655	0.56	0.621	0.654	0.722	0.61	0.483	0.557	0.469	0.513	0.593	0.624	0.486	0.59	0.577	0.576	0.573	0.562	0.477	0.563	0.608	0.609	0.689	0.58	0.473	0.643	0.639	0.544	0.535	0.564	0.499	0.689
	0.65	0.643	0.595	0.639	0.523	0.507	0.67	0.548	0.656	0.617	0.591	0.52	0.691	0.545	0.586	0.671	0.727	0.666	0.595	0.688	0.769	0.906	0.656	0.52	0.648	0.503	0.557	0.681	0.761	0.496	0.595	0.663	0.739	0.601	0.618	0.498	0.65	0.649	0.63	0.766	0.64	0.506	0.699	0.667	0.561	0.571	0.607	0.53	0.757
	0.597	0.607	0.542	0.605	0.493	0.477	0.554	0.5	0.614	0.581	0.56	0.492	0.604	0.508	0.533	0.584	0.691	0.651	0.554	0.625	0.599	0.787	0.59	0.481	0.547	0.478	0.522	0.673	0.675	0.481	0.562	0.542	0.608	0.587	0.569	0.481	0.594	0.582	0.614	0.718	0.612	0.489	0.662	0.643	0.542	0.541	0.579	0.502	0.698
[truncated: 177 more columns]

## Sheet: Figure 1D % Responders
	K14 Piezo1 KO	wt
62.5	1	8
125	1	32
250	0	50
500	0	60
1000	1	97

## Sheet: Figure 1E Human Trace
time (s)
1.282	0.107	0.106	0.1	0.106	0.141	0.087	0.099	0.157	0.083	0.113	0.09	0.076	0.097	0.09	0.092	0.079	0.087	0.075	0.078	0.098	0.078	0.093	0.075	0.079	0.075	0.095	0.085	0.098	0.091	0.117	0.08	0.087	0.088	0.086	0.078	0.074	0.071	0.082	0.09	0.073	0.085	0.183	0.087	0.086	0.106	0.083	0.083	0.08	0.083
2.02	0.103	0.099	0.092	0.099	0.134	0.081	0.093	0.143	0.078	0.106	0.085	0.078	0.095	0.088	0.09	0.079	0.086	0.075	0.079	0.098	0.076	0.088	0.078	0.079	0.077	0.094	0.083	0.099	0.093	0.117	0.08	0.088	0.086	0.084	0.078	0.074	0.072	0.087	0.089	0.077	0.086	0.189	0.089	0.082	0.102	0.084	0.085	0.083	0.081
2.786	0.103	0.098	0.091	0.098	0.137	0.081	0.091	0.148	0.079	0.107	0.086	0.077	0.095	0.09	0.089	0.08	0.088	0.078	0.08	0.1	0.077	0.091	0.081	0.08	0.076	0.093	0.085	0.098	0.089	0.121	0.078	0.087	0.086	0.085	0.081	0.076	0.077	0.086	0.089	0.079	0.083	0.182	0.089	0.084	0.104	0.085	0.087	0.082	0.081
3.535	0.111	0.103	0.099	0.104	0.14	0.086	0.098	0.152	0.083	0.112	0.091	0.076	0.094	0.09	0.088	0.08	0.09	0.074	0.079	0.096	0.078	0.09	0.077	0.08	0.076	0.091	0.084	0.099	0.089	0.118	0.079	0.086	0.087	0.086	0.079	0.075	0.075	0.085	0.09	0.074	0.083	0.177	0.09	0.084	0.105	0.082	0.083	0.079	0.084
4.289	0.111	0.104	0.098	0.105	0.144	0.09	0.098	0.153	0.082	0.113	0.088	0.076	0.093	0.09	0.088	0.079	0.089	0.075	0.081	0.097	0.079	0.09	0.079	0.079	0.075	0.093	0.087	0.097	0.093	0.123	0.082	0.087	0.087	0.083	0.079	0.075	0.076	0.083	0.094	0.076	0.086	0.17	0.088	0.083	0.107	0.086	0.081	0.082	0.08
5.039	0.101	0.099	0.094	0.098	0.135	0.08	0.092	0.146	0.079	0.106	0.085	0.077	0.095	0.087	0.093	0.081	0.087	0.075	0.08	0.098	0.084	0.094	0.079	0.08	0.077	0.091	0.086	0.097	0.088	0.123	0.082	0.089	0.089	0.085	0.08	0.077	0.076	0.084	0.092	0.074	0.083	0.17	0.09	0.086	0.105	0.085	0.085	0.084	0.084
6.03	0.1	0.097	0.094	0.099	0.133	0.081	0.093	0.145	0.079	0.109	0.085	0.08	0.098	0.09	0.092	0.08	0.087	0.077	0.076	0.098	0.085	0.093	0.079	0.08	0.077	0.092	0.085	0.098	0.092	0.12	0.082	0.087	0.088	0.085	0.079	0.072	0.073	0.084	0.09	0.071	0.085	0.161	0.087	0.082	0.104	0.084	0.082	0.082	0.085
6.783	0.103	0.098	0.093	0.099	0.13	0.084	0.094	0.146	0.078	0.107	0.086	0.078	0.094	0.089	0.087	0.08	0.088	0.075	0.078	0.097	0.081	0.094	0.072	0.08	0.073	0.094	0.084	0.099	0.093	0.121	0.079	0.087	0.086	0.085	0.079	0.074	0.075	0.086	0.091	0.075	0.086	0.16	0.088	0.081	0.098	0.085	0.085	0.084	0.08
7.519	0.103	0.099	0.094	0.099	0.138	0.083	0.094	0.15	0.081	0.11	0.088	0.082	0.103	0.097	0.097	0.086	0.093	0.082	0.085	0.1	0.091	0.104	0.084	0.087	0.082	0.099	0.09	0.103	0.099	0.126	0.088	0.094	0.091	0.091	0.086	0.08	0.081	0.096	0.101	0.08	0.09	0.166	0.093	0.089	0.108	0.091	0.091	0.09	0.092
8.301	0.111	0.107	0.101	0.106	0.15	0.093	0.099	0.161	0.087	0.117	0.092	0.083	0.104	0.102	0.098	0.087	0.096	0.084	0.09	0.102	0.093	0.102	0.087	0.085	0.083	0.098	0.092	0.104	0.1	0.125	0.091	0.095	0.093	0.092	0.088	0.081	0.085	0.097	0.099	0.082	0.09	0.171	0.094	0.089	0.116	0.093	0.091	0.091	0.091
9.1	0.102	0.098	0.094	0.098	0.131	0.081	0.09	0.148	0.079	0.108	0.084	0.086	0.105	0.101	0.096	0.088	0.096	0.084	0.09	0.104	0.095	0.102	0.089	0.087	0.083	0.099	0.092	0.105	0.097	0.133	0.088	0.093	0.093	0.092	0.085	0.08	0.082	0.096	0.099	0.083	0.091	0.168	0.095	0.091	0.106	0.092	0.095	0.091	0.09
9.917	0.1	0.098	0.094	0.097	0.135	0.083	0.09	0.145	0.079	0.105	0.084	0.077	0.095	0.087	0.087	0.078	0.086	0.079	0.077	0.096	0.08	0.091	0.077	0.079	0.077	0.091	0.086	0.097	0.093	0.122	0.08	0.087	0.086	0.086	0.078	0.072	0.074	0.085	0.086	0.074	0.085	0.155	0.089	0.082	0.103	0.084	0.09	0.081	0.085
10.635	0.1	0.099	0.095	0.097	0.133	0.081	0.092	0.148	0.079	0.106	0.087	0.075	0.097	0.088	0.088	0.078	0.085	0.072	0.077	0.096	0.082	0.092	0.077	0.078	0.072	0.093	0.084	0.1	0.092	0.118	0.081	0.087	0.086	0.085	0.077	0.074	0.073	0.085	0.086	0.073	0.083	0.153	0.089	0.079	0.101	0.086	0.088	0.084	0.081
11.386	0.101	0.1	0.095	0.1	0.137	0.083	0.092	0.152	0.08	0.108	0.087	0.078	0.096	0.092	0.089	0.08	0.09	0.074	0.079	0.098	0.078	0.089	0.072	0.08	0.076	0.091	0.086	0.097	0.091	0.119	0.083	0.088	0.088	0.086	0.078	0.074	0.076	0.086	0.087	0.074	0.083	0.149	0.088	0.081	0.103	0.085	0.087	0.085	0.081
12.207	0.103	0.1	0.092	0.096	0.135	0.085	0.09	0.152	0.078	0.107	0.086	0.079	0.096	0.088	0.089	0.08	0.087	0.074	0.077	0.096	0.084	0.096	0.078	0.081	0.074	0.093	0.086	0.1	0.091	0.121	0.082	0.086	0.087	0.087	0.081	0.075	0.075	0.086	0.092	0.072	0.083	0.149	0.088	0.083	0.1	0.086	0.087	0.084	0.085
13.035	0.1	0.099	0.092	0.1	0.132	0.084	0.092	0.15	0.081	0.108	0.086	0.076	0.098	0.088	0.087	0.079	0.088	0.077	0.077	0.096	0.079	0.092	0.079	0.081	0.076	0.094	0.086	0.097	0.09	0.12	0.081	0.086	0.088	0.085	0.078	0.077	0.074	0.083	0.09	0.076	0.083	0.152	0.089	0.085	0.102	0.087	0.089	0.082	0.083
13.77	0.105	0.097	0.093	0.099	0.134	0.083	0.093	0.15	0.08	0.106	0.085	0.079	0.097	0.087	0.087	0.079	0.087	0.073	0.08	0.099	0.087	0.095	0.074	0.08	0.075	0.093	0.086	0.097	0.091	0.121	0.081	0.088	0.088	0.084	0.078	0.073	0.073	0.081	0.09	0.075	0.084	0.151	0.09	0.084	0.103	0.085	0.088	0.085	0.083
14.569	0.112	0.103	0.101	0.103	0.142	0.088	0.097	0.162	0.084	0.115	0.089	0.078	0.097	0.09	0.091	0.079	0.088	0.074	0.078	0.098	0.081	0.093	0.08	0.08	0.077	0.094	0.085	0.1	0.09	0.115	0.081	0.086	0.089	0.087	0.078	0.073	0.074	0.085	0.09	0.076	0.086	0.152	0.088	0.083	0.106	0.086	0.09	0.084	0.084
15.32	0.109	0.103	0.098	0.102	0.143	0.09	0.099	0.162	0.083	0.116	0.091	0.086	0.103	0.097	0.1	0.087	0.1	0.087	0.091	0.104	0.093	0.103	0.086	0.087	0.084	0.097	0.093	0.105	0.095	0.132	0.091	0.094	0.095	0.092	0.087	0.08	0.085	0.095	0.1	0.084	0.094	0.161	0.095	0.09	0.121	0.092	0.094	0.091	0.093
16.134	0.102	0.096	0.092	0.099	0.132	0.082	0.093	0.151	0.079	0.106	0.083	0.085	0.104	0.097	0.099	0.086	0.098	0.081	0.089	0.103	0.093	0.101	0.087	0.085	0.083	0.097	0.09	0.104	0.094	0.127	0.087	0.092	0.095	0.093	0.089	0.081	0.083	0.093	0.098	0.083	0.09	0.159	0.093	0.092	0.117	0.091	0.095	0.089	0.089
16.937	0.11	0.105	0.099	0.106	0.142	0.089	0.1	0.166	0.085	0.115	0.089	0.084	0.102	0.098	0.099	0.087	0.095	0.087	0.091	0.102	0.095	0.104	0.09	0.084	0.085	0.098	0.092	0.105	0.097	0.124	0.089	0.093	0.095	0.091	0.088	0.079	0.085	0.093	0.101	0.084	0.09	0.155	0.096	0.089	0.112	0.091	0.092	0.092	0.092
17.772	0.103	0.097	0.094	0.097	0.134	0.084	0.093	0.152	0.08	0.107	0.087	0.076	0.096	0.089	0.088	0.077	0.086	0.074	0.078	0.097	0.078	0.093	0.078	0.079	0.075	0.092	0.086	0.098	0.089	0.124	0.08	0.085	0.088	0.087	0.08	0.074	0.072	0.084	0.089	0.073	0.083	0.141	0.088	0.082	0.099	0.086	0.086	0.083	0.087
18.501	0.111	0.105	0.099	0.108	0.144	0.089	0.1	0.162	0.084	0.113	0.09	0.076	0.095	0.089	0.087	0.078	0.086	0.075	0.078	0.098	0.083	0.092	0.076	0.08	0.074	0.093	0.085	0.099	0.092	0.119	0.083	0.088	0.089	0.085	0.077	0.075	0.075	0.087	0.09	0.077	0.085	0.141	0.09	0.079	0.1	0.083	0.091	0.085	0.084
19.382	0.109	0.104	0.1	0.106	0.141	0.086	0.098	0.161	0.083	0.115	0.091	0.077	0.095	0.088	0.088	0.075	0.087	0.075	0.08	0.097	0.08	0.092	0.079	0.078	0.078	0.092	0.084	0.099	0.09	0.118	0.079	0.088	0.088	0.084	0.079	0.075	0.075	0.085	0.092	0.073	0.084	0.141	0.086	0.082	0.098	0.086	0.09	0.084	0.085
20.182	0.111	0.102	0.1	0.105	0.141	0.09	0.1	0.156	0.083	0.112	0.092	0.077	0.094	0.088	0.087	0.077	0.088	0.073	0.08	0.098	0.078	0.092	0.079	0.078	0.078	0.094	0.084	0.098	0.092	0.124	0.079	0.086	0.088	0.087	0.077	0.073	0.072	0.084	0.091	0.074	0.084	0.132	0.087	0.081	0.106	0.085	0.089	0.082	0.081
20.981	0.102	0.097	0.093	0.097	0.129	0.083	0.088	0.143	0.079	0.107	0.086	0.077	0.098	0.088	0.091	0.079	0.085	0.076	0.079	0.097	0.081	0.095	0.077	0.079	0.078	0.092	0.086	0.099	0.089	0.117	0.08	0.087	0.089	0.085	0.081	0.073	0.074	0.087	0.091	0.075	0.085	0.131	0.09	0.083	0.107	0.086	0.088	0.084	0.087
21.797	0.105	0.099	0.094	0.1	0.133	0.082	0.094	0.147	0.081	0.107	0.084	0.08	0.094	0.09	0.088	0.078	0.087	0.075	0.079	0.097	0.081	0.095	0.078	0.079	0.073	0.092	0.085	0.096	0.091	0.123	0.079	0.087	0.089	0.086	0.079	0.073	0.073	0.085	0.091	0.078	0.085	0.128	0.09	0.085	0.1	0.083	0.087	0.085	0.085
22.531	0.112	0.106	0.102	0.108	0.141	0.088	0.1	0.157	0.084	0.112	0.09	0.083	0.103	0.098	0.1	0.086	0.093	0.081	0.085	0.103	0.093	0.102	0.083	0.086	0.083	0.098	0.091	0.105	0.098	0.123	0.088	0.093	0.095	0.093	0.086	0.08	0.083	0.098	0.099	0.083	0.089	0.135	0.095	0.091	0.119	0.091	0.096	0.091	0.089
23.347	0.111	0.104	0.099	0.106	0.144	0.09	0.099	0.158	0.083	0.112	0.09	0.079	0.095	0.089	0.086	0.076	0.086	0.074	0.076	0.098	0.079	0.093	0.076	0.08	0.075	0.094	0.085	0.098	0.092	0.121	0.079	0.085	0.088	0.088	0.08	0.074	0.076	0.085	0.092	0.073	0.085	0.122	0.088	0.085	0.105	0.086	0.088	0.084	0.084
24.081	0.1	0.098	0.092	0.097	0.131	0.083	0.092	0.149	0.08	0.107	0.083	0.078	0.095	0.088	0.093	0.082	0.09	0.074	0.077	0.098	0.081	0.093	0.078	0.08	0.076	0.092	0.086	0.098	0.093	0.117	0.082	0.086	0.088	0.085	0.08	0.074	0.072	0.08	0.092	0.076	0.083	0.123	0.089	0.086	0.106	0.083	0.087	0.082	0.085
24.85	0.104	0.1	0.095	0.101	0.13	0.083	0.094	0.149	0.081	0.107	0.085	0.076	0.096	0.09	0.088	0.078	0.089	0.075	0.082	0.099	0.077	0.092	0.078	0.079	0.079	0.091	0.085	0.098	0.09	0.112	0.082	0.086	0.086	0.087	0.078	0.073	0.074	0.085	0.092	0.075	0.084	0.119	0.087	0.086	0.108	0.083	0.087	0.083	0.084
25.635	0.111	0.102	0.1	0.106	0.142	0.089	0.099	0.155	0.086	0.113	0.093	0.079	0.096	0.091	0.088	0.077	0.088	0.073	0.078	0.1	0.08	0.091	0.077	0.08	0.076	0.091	0.086	0.099	0.09	0.114	0.08	0.086	0.087	0.088	0.079	0.075	0.074	0.084	0.089	0.075	0.084	0.121	0.09	0.084	0.103	0.083	0.088	0.084	0.086
26.37	0.104	0.099	0.093	0.098	0.132	0.086	0.091	0.144	0.08	0.107	0.088	0.076	0.097	0.088	0.09	0.08	0.087	0.075	0.081	0.099	0.079	0.095	0.075	0.08	0.076	0.094	0.086	0.098	0.091	0.115	0.078	0.086	0.089	0.084	0.079	0.074	0.073	0.086	0.091	0.073	0.081	0.116	0.09	0.085	0.1	0.084	0.086	0.084	0.082
27.169	0.101	0.099	0.092	0.097	0.127	0.083	0.093	0.141	0.08	0.107	0.084	0.078	0.095	0.091	0.092	0.077	0.085	0.075	0.079	0.099	0.082	0.09	0.078	0.08	0.076	0.095	0.086	0.099	0.09	0.114	0.079	0.087	0.088	0.084	0.078	0.072	0.074	0.085	0.092	0.073	0.085	0.116	0.09	0.084	0.104	0.082	0.084	0.085	0.085
27.937	0.114	0.104	0.099	0.105	0.14	0.087	0.097	0.155	0.085	0.113	0.089	0.082	0.104	0.102	0.099	0.087	0.095	0.084	0.09	0.102	0.091	0.099	0.088	0.085	0.087	0.097	0.092	0.103	0.098	0.121	0.088	0.095	0.095	0.092	0.085	0.081	0.083	0.097	0.1	0.084	0.09	0.12	0.092	0.095	0.113	0.09	0.094	0.089	0.095
28.687	0.114	0.104	0.101	0.106	0.143	0.087	0.1	0.157	0.084	0.113	0.093	0.077	0.097	0.088	0.088	0.08	0.087	0.075	0.079	0.098	0.081	0.093	0.078	0.08	0.078	0.094	0.087	0.097	0.091	0.117	0.08	0.088	0.086	0.084	0.078	0.074	0.072	0.085	0.088	0.073	0.083	0.11	0.09	0.083	0.102	0.079	0.083	0.085	0.083
29.582	0.112	0.104	0.1	0.108	0.143	0.091	0.101	0.159	0.085	0.116	0.09	0.077	0.097	0.089	0.089	0.078	0.087	0.078	0.081	0.098	0.082	0.093	0.075	0.08	0.077	0.092	0.085	0.096	0.091	0.116	0.079	0.088	0.088	0.085	0.077	0.075	0.072	0.086	0.091	0.074	0.085	0.11	0.088	0.086	0.101	0.082	0.086	0.083	0.086
30.383	0.108	0.103	0.099	0.107	0.142	0.088	0.098	0.153	0.085	0.113	0.093	0.08	0.097	0.091	0.088	0.079	0.087	0.069	0.077	0.097	0.08	0.091	0.075	0.08	0.076	0.093	0.086	0.097	0.093	0.117	0.082	0.086	0.088	0.085	0.079	0.075	0.074	0.084	0.091	0.073	0.083	0.106	0.088	0.088	0.103	0.081	0.088	0.083	0.086
31.151	0.104	0.097	0.095	0.099	0.134	0.082	0.09	0.144	0.079	0.108	0.085	0.087	0.104	0.097	0.098	0.086	0.096	0.083	0.089	0.102	0.092	0.099	0.084	0.085	0.086	0.097	0.092	0.104	0.097	0.122	0.088	0.093	0.094	0.092	0.085	0.078	0.085	0.094	0.1	0.081	0.091	0.115	0.094	0.091	0.115	0.087	0.091	0.092	0.092
31.901	0.101	0.097	0.093	0.098	0.134	0.083	0.092	0.141	0.08	0.107	0.085	0.078	0.097	0.09	0.088	0.078	0.084	0.07	0.076	0.099	0.082	0.092	0.077	0.08	0.076	0.093	0.087	0.096	0.094	0.117	0.081	0.089	0.087	0.086	0.08	0.073	0.072	0.081	0.092	0.075	0.083	0.105	0.09	0.084	0.1	0.08	0.087	0.086	0.086
32.799	0.113	0.103	0.098	0.104	0.144	0.09	0.097	0.155	0.085	0.111	0.091	0.081	0.098	0.09	0.089	0.079	0.089	0.078	0.078	0.098	0.078	0.093	0.081	0.08	0.077	0.093	0.086	0.099	0.093	0.117	0.082	0.088	0.089	0.086	0.079	0.074	0.073	0.085	0.092	0.075	0.083	0.104	0.09	0.084	0.103	0.082	0.085	0.086	0.084
33.596	0.101	0.098	0.094	0.099	0.132	0.084	0.092	0.137	0.082	0.105	0.086	0.086	0.108	0.099	0.102	0.084	0.096	0.085	0.087	0.102	0.089	0.1	0.086	0.085	0.083	0.097	0.093	0.105	0.096	0.119	0.088	0.093	0.094	0.092	0.088	0.081	0.085	0.097	0.103	0.083	0.09	0.108	0.094	0.091	0.116	0.088	0.094	0.092	0.092
34.398	0.101	0.097	0.093	0.098	0.134	0.084	0.091	0.146	0.08	0.109	0.085	0.088	0.104	0.1	0.098	0.085	0.096	0.081	0.087	0.102	0.09	0.102	0.09	0.085	0.084	0.098	0.093	0.106	0.098	0.122	0.087	0.093	0.096	0.093	0.088	0.081	0.082	0.091	0.101	0.082	0.089	0.107	0.095	0.095	0.119	0.089	0.093	0.09	0.092
35.149	0.112	0.103	0.1	0.104	0.142	0.09	0.099	0.155	0.083	0.114	0.091	0.086	0.106	0.1	0.097	0.084	0.097	0.081	0.089	0.103	0.094	0.101	0.088	0.086	0.084	0.097	0.091	0.104	0.097	0.123	0.091	0.093	0.094	0.092	0.087	0.079	0.084	0.095	0.101	0.082	0.089	0.107	0.095	0.093	0.117	0.088	0.093	0.091	0.091
35.884	0.109	0.103	0.1	0.107	0.144	0.087	0.099	0.155	0.085	0.114	0.095	0.079	0.101	0.088	0.086	0.076	0.085	0.072	0.075	0.096	0.08	0.089	0.078	0.079	0.075	0.091	0.086	0.095	0.09	0.116	0.079	0.084	0.087	0.087	0.081	0.075	0.076	0.09	0.092	0.074	0.083	0.1	0.089	0.087	0.11	0.082	0.087	0.085	0.089
36.65	0.108	0.101	0.1	0.107	0.142	0.089	0.1	0.155	0.084	0.112	0.093	0.084	0.107	0.102	0.099	0.088	0.099	0.085	0.089	0.104	0.093	0.103	0.091	0.086	0.086	0.099	0.092	0.104	0.099	0.118	0.088	0.096	0.095	0.093	0.088	0.081	0.085	0.098	0.103	0.082	0.092	0.107	0.091	0.091	0.116	0.089	0.095	0.09	0.092
37.467	0.101	0.098	0.092	0.097	0.129	0.083	0.091	0.145	0.08	0.105	0.085	0.085	0.105	0.098	0.096	0.085	0.095	0.082	0.09	0.104	0.091	0.1	0.091	0.087	0.086	0.099	0.093	0.104	0.097	0.124	0.088	0.094	0.094	0.093	0.086	0.08	0.084	0.097	0.099	0.083	0.088	0.105	0.093	0.095	0.111	0.087	0.09	0.093	0.091
38.25	0.104	0.096	0.092	0.097	0.135	0.083	0.091	0.145	0.081	0.106	0.087	0.086	0.104	0.101	0.099	0.086	0.098	0.085	0.088	0.103	0.092	0.101	0.088	0.084	0.084	0.097	0.093	0.105	0.096	0.123	0.086	0.092	0.094	0.093	0.086	0.08	0.084	0.096	0.102	0.082	0.088	0.105	0.095	0.09	0.108	0.087	0.09	0.092	0.091
39.066	0.103	0.098	0.093	0.097	0.133	0.084	0.092	0.146	0.08	0.106	0.087	0.079	0.099	0.089	0.09	0.078	0.089	0.073	0.078	0.098	0.079	0.093	0.076	0.081	0.076	0.092	0.087	0.098	0.092	0.114	0.08	0.087	0.087	0.087	0.079	0.076	0.074	0.083	0.092	0.073	0.084	0.095	0.091	0.082	0.105	0.08	0.084	0.083	0.085
39.817	0.102	0.098	0.091	0.096	0.135	0.083	0.093	0.147	0.08	0.107	0.087	0.08	0.1	0.089	0.089	0.079	0.084	0.073	0.077	0.096	0.08	0.091	0.078	0.079	0.076	0.092	0.083	0.095	0.092	0.112	0.08	0.089	0.088	0.089	0.078	0.075	0.076	0.087	0.093	0.079	0.082	0.094	0.089	0.084	0.101	0.081	0.086	0.085	0.087
40.569	0.102	0.099	0.094	0.099	0.134	0.082	0.092	0.148	0.081	0.106	0.085	0.084	0.104	0.098	0.1	0.087	0.098	0.083	0.088	0.103	0.094	0.1	0.088	0.085	0.084	0.1	0.09	0.106	0.095	0.126	0.089	0.094	0.095	0.093	0.088	0.078	0.082	0.094	0.099	0.082	0.088	0.1	0.092	0.093	0.108	0.086	0.09	0.091	0.089
41.43	0.105	0.098	0.093	0.099	0.138	0.083	0.091	0.148	0.081	0.107	0.084	0.079	0.098	0.089	0.09	0.077	0.087	0.069	0.08	0.096	0.081	0.091	0.076	0.08	0.078	0.093	0.086	0.099	0.093	0.118	0.08	0.086	0.089	0.086	0.076	0.075	0.073	0.086	0.092	0.075	0.082	0.091	0.085	0.083	0.106	0.081	0.084	0.084	0.085
42.198	0.108	0.103	0.102	0.107	0.145	0.092	0.101	0.161	0.085	0.115	0.093	0.076	0.099	0.089	0.085	0.078	0.088	0.072	0.078	0.099	0.079	0.092	0.079	0.08	0.079	0.094	0.086	0.097	0.091	0.113	0.079	0.086	0.087	0.088	0.077	0.076	0.074	0.082	0.091	0.075	0.083	0.088	0.087	0.082	0.103	0.079	0.083	0.084	0.084
43.05	0.11	0.104	0.101	0.107	0.143	0.089	0.099	0.161	0.083	0.114	0.091	0.084	0.101	0.097	0.1	0.087	0.097	0.082	0.091	0.102	0.094	0.099	0.088	0.088	0.085	0.099	0.093	0.105	0.099	0.124	0.09	0.093	0.093	0.093	0.087	0.081	0.082	0.094	0.102	0.081	0.089	0.096	0.093	0.09	0.117	0.086	0.095	0.092	0.093
43.797	0.109	0.103	0.1	0.105	0.144	0.091	0.098	0.162	0.084	0.114	0.091	0.084	0.106	0.099	0.102	0.088	0.094	0.086	0.088	0.102	0.09	0.101	0.087	0.085	0.084	0.098	0.092	0.106	0.102	0.126	0.089	0.093	0.095	0.094	0.089	0.079	0.084	0.094	0.102	0.085	0.09	0.095	0.092	0.091	0.121	0.086	0.091	0.09	0.093
44.55	0.109	0.105	0.1	0.105	0.145	0.09	0.098	0.16	0.087	0.112	0.091	0.083	0.107	0.099	0.096	0.087	0.096	0.082	0.086	0.102	0.091	0.101	0.089	0.085	0.086	0.1	0.092	0.104	0.101	0.124	0.089	0.094	0.097	0.093	0.088	0.079	0.084	0.094	0.101	0.085	0.088	0.094	0.094	0.091	0.111	0.086	0.09	0.091	0.094
45.303	0.1	0.097	0.094	0.098	0.135	0.083	0.093	0.153	0.081	0.109	0.088	0.079	0.097	0.093	0.086	0.08	0.086	0.074	0.079	0.097	0.08	0.092	0.076	0.078	0.077	0.093	0.084	0.099	0.093	0.115	0.079	0.089	0.087	0.086	0.077	0.076	0.074	0.082	0.091	0.074	0.078	0.086	0.088	0.083	0.1	0.078	0.081	0.085	0.082
46.117	0.101	0.1	0.093	0.097	0.136	0.082	0.094	0.152	0.08	0.11	0.088	0.084	0.101	0.099	0.098	0.088	0.097	0.083	0.09	0.103	0.093	0.104	0.091	0.086	0.085	0.099	0.092	0.105	0.098	0.119	0.088	0.092	0.094	0.094	0.086	0.083	0.084	0.098	0.103	0.085	0.09	0.088	0.093	0.092	0.112	0.085	0.088	0.088	0.093
46.933	0.108	0.102	0.1	0.107	0.145	0.086	0.101	0.16	0.084	0.112	0.095	0.078	0.096	0.089	0.089	0.078	0.087	0.07	0.077	0.097	0.082	0.094	0.076	0.079	0.076	0.092	0.085	0.097	0.091	0.114	0.078	0.087	0.089	0.088	0.079	0.073	0.074	0.086	0.093	0.075	0.084	0.088	0.087	0.081	0.098	0.077	0.082	0.084	0.086
47.668	0.111	0.104	0.1	0.108	0.144	0.088	0.1	0.159	0.087	0.113	0.09	0.084	0.104	0.1	0.1	0.089	0.095	0.086	0.09	0.104	0.092	0.101	0.09	0.087	0.086	0.097	0.093	0.105	0.1	0.124	0.088	0.096	0.097	0.093	0.086	0.081	0.082	0.097	0.103	0.084	0.089	0.097	0.093	0.088	0.114	0.084	0.089	0.092	0.091
48.418	0.111	0.105	0.103	0.111	0.149	0.088	0.102	0.16	0.088	0.114	0.092	0.079	0.098	0.09	0.089	0.078	0.088	0.074	0.079	0.098	0.079	0.091	0.076	0.08	0.078	0.094	0.085	0.098	0.09	0.117	0.084	0.087	0.087	0.088	0.08	0.074	0.077	0.089	0.094	0.073	0.082	0.083	0.086	0.081	0.109	0.078	0.083	0.084	0.084
49.219	0.109	0.106	0.1	0.107	0.144	0.09	0.101	0.164	0.084	0.113	0.091	0.074	0.096	0.09	0.09	0.08	0.087	0.075	0.076	0.097	0.084	0.094	0.073	0.08	0.08	0.092	0.086	0.099	0.094	0.116	0.08	0.087	0.088	0.086	0.078	0.074	0.076	0.087	0.094	0.077	0.083	0.083	0.088	0.081	0.096	0.077	0.078	0.085	0.085
49.94	0.108	0.107	0.101	0.108	0.147	0.091	0.102	0.162	0.086	0.113	0.093	0.076	0.096	0.092	0.09	0.078	0.086	0.07	0.08	0.097	0.081	0.094	0.076	0.08	0.081	0.09	0.085	0.099	0.093	0.113	0.079	0.087	0.09	0.087	0.081	0.075	0.075	0.083	0.095	0.077	0.082	0.083	0.086	0.083	0.103	0.076	0.076	0.083	0.088
50.675	0.102	0.096	0.096	0.102	0.133	0.084	0.094	0.154	0.08	0.107	0.086	0.078	0.097	0.089	0.091	0.078	0.087	0.073	0.075	0.098	0.081	0.092	0.074	0.077	0.075	0.094	0.086	0.098	0.093	0.112	0.08	0.087	0.087	0.088	0.079	0.073	0.078	0.088	0.096	0.074	0.083	0.081	0.085	0.082	0.096	0.076	0.08	0.084	0.084
51.411	0.102	0.098	0.095	0.102	0.134	0.084	0.094	0.153	0.081	0.108	0.087	0.086	0.105	0.098	0.099	0.085	0.097	0.089	0.086	0.101	0.094	0.101	0.087	0.087	0.085	0.096	0.093	0.105	0.099	0.122	0.085	0.096	0.096	0.095	0.09	0.083	0.086	0.094	0.102	0.082	0.088	0.089	0.095	0.091	0.12	0.084	0.087	0.092	0.091
52.226	0.11	0.106	0.101	0.106	0.145	0.09	0.102	0.161	0.086	0.113	0.092	0.083	0.106	0.101	0.102	0.088	0.098	0.083	0.09	0.103	0.096	0.104	0.091	0.086	0.084	0.097	0.094	0.105	0.098	0.126	0.09	0.096	0.096	0.093	0.088	0.078	0.085	0.096	0.104	0.083	0.089	0.089	0.093	0.086	0.119	0.085	0.089	0.091	0.09
52.944	0.101	0.101	0.095	0.101	0.137	0.083	0.093	0.152	0.08	0.106	0.085	0.08	0.096	0.087	0.089	0.079	0.086	0.076	0.077	0.098	0.082	0.093	0.078	0.079	0.076	0.092	0.085	0.1	0.095	0.111	0.081	0.089	0.089	0.088	0.08	0.076	0.076	0.086	0.095	0.077	0.082	0.081	0.087	0.081	0.103	0.077	0.08	0.083	0.084
53.696	0.109	0.105	0.102	0.107	0.143	0.09	0.101	0.158	0.083	0.112	0.093	0.084	0.106	0.095	0.098	0.087	0.099	0.084	0.092	0.104	0.091	0.104	0.089	0.085	0.085	0.098	0.092	0.106	0.096	0.122	0.089	0.095	0.096	0.093	0.088	0.082	0.086	0.095	0.103	0.084	0.087	0.09	0.093	0.089	0.115	0.085	0.088	0.091	0.094
54.432	0.101	0.099	0.094	0.099	0.135	0.085	0.093	0.156	0.079	0.108	0.086	0.076	0.095	0.088	0.091	0.079	0.087	0.075	0.082	0.097	0.083	0.091	0.078	0.079	0.079	0.093	0.085	0.098	0.093	0.115	0.083	0.09	0.086	0.087	0.076	0.074	0.075	0.081	0.091	0.072	0.081	0.081	0.088	0.08	0.107	0.078	0.081	0.084	0.087
55.168	0.112	0.106	0.101	0.107	0.144	0.09	0.102	0.163	0.085	0.113	0.091	0.082	0.103	0.101	0.103	0.087	0.096	0.086	0.089	0.103	0.097	0.104	0.089	0.086	0.085	0.098	0.093	0.108	0.098	0.126	0.09	0.095	0.093	0.094	0.086	0.084	0.085	0.095	0.102	0.083	0.089	0.087	0.091	0.089	0.115	0.086	0.086	0.09	0.09
55.919	0.103	0.097	0.095	0.099	0.134	0.08	0.091	0.15	0.081	0.106	0.085	0.083	0.103	0.1	0.1	0.087	0.096	0.084	0.089	0.103	0.091	0.101	0.09	0.084	0.087	0.097	0.091	0.105	0.099	0.125	0.09	0.094	0.095	0.095	0.088	0.08	0.083	0.096	0.102	0.084	0.088	0.087	0.093	0.087	0.115	0.086	0.085	0.089	0.093
56.655	0.111	0.102	0.1	0.108	0.144	0.086	0.1	0.159	0.085	0.113	0.094	0.079	0.098	0.091	0.095	0.081	0.087	0.077	0.08	0.098	0.082	0.091	0.08	0.079	0.078	0.093	0.087	0.098	0.094	0.114	0.08	0.089	0.089	0.088	0.081	0.074	0.076	0.084	0.093	0.072	0.085	0.081	0.089	0.081	0.094	0.076	0.081	0.084	0.083
57.474	0.108	0.104	0.1	0.106	0.147	0.089	0.101	0.162	0.083	0.115	0.094	0.085	0.105	0.098	0.101	0.085	0.099	0.083	0.091	0.105	0.092	0.099	0.087	0.086	0.087	0.1	0.091	0.107	0.101	0.121	0.093	0.093	0.095	0.094	0.086	0.081	0.085	0.099	0.103	0.085	0.092	0.086	0.094	0.089	0.108	0.085	0.089	0.092	0.095
58.226	0.101	0.098	0.095	0.101	0.134	0.084	0.094	0.15	0.081	0.105	0.087	0.086	0.103	0.103	0.102	0.085	0.096	0.085	0.091	0.104	0.094	0.102	0.087	0.084	0.084	0.098	0.093	0.107	0.099	0.123	0.088	0.093	0.097	0.094	0.088	0.079	0.083	0.094	0.102	0.085	0.09	0.089	0.093	0.089	0.115	0.084	0.085	0.092	0.091
59.038	0.112	0.105	0.103	0.109	0.144	0.091	0.1	0.165	0.084	0.114	0.09	0.083	0.106	0.099	0.102	0.085	0.094	0.083	0.088	0.103	0.092	0.104	0.088	0.085	0.086	0.099	0.092	0.107	0.1	0.117	0.089	0.097	0.097	0.094	0.086	0.082	0.085	0.094	0.102	0.085	0.087	0.084	0.096	0.087	0.107	0.082	0.087	0.091	0.094
59.761	0.111	0.105	0.101	0.111	0.144	0.09	0.1	0.162	0.085	0.115	0.092	0.084	0.103	0.099	0.099	0.085	0.097	0.084	0.087	0.103	0.089	0.103	0.086	0.084	0.086	0.097	0.092	0.105	0.097	0.122	0.087	0.093	0.097	0.094	0.089	0.08	0.084	0.091	0.102	0.083	0.086	0.087	0.094	0.087	0.106	0.084	0.085	0.088	0.091
60.556	0.104	0.099	0.095	0.1	0.129	0.086	0.094	0.15	0.081	0.107	0.085	0.082	0.104	0.101	0.102	0.086	0.097	0.084	0.088	0.101	0.089	0.105	0.082	0.084	0.083	0.097	0.09	0.103	0.099	0.124	0.091	0.093	0.096	0.094	0.087	0.083	0.088	0.095	0.101	0.081	0.087	0.085	0.094	0.088	0.108	0.083	0.087	0.091	0.09
61.306	0.111	0.104	0.103	0.107	0.141	0.089	0.102	0.16	0.085	0.113	0.091	0.084	0.107	0.1	0.101	0.086	0.095	0.086	0.086	0.102	0.091	0.098	0.086	0.085	0.085	0.098	0.094	0.105	0.099	0.12	0.088	0.095	0.097	0.092	0.086	0.078	0.084	0.095	0.099	0.086	0.087	0.087	0.092	0.085	0.111	0.081	0.09	0.089	0.093
62.171	0.112	0.103	0.102	0.108	0.146	0.091	0.099	0.159	0.087	0.113	0.091	0.085	0.105	0.098	0.102	0.086	0.099	0.087	0.091	0.103	0.097	0.102	0.088	0.085	0.087	0.099	0.091	0.106	0.1	0.119	0.089	0.097	0.096	0.094	0.088	0.081	0.085	0.096	0.101	0.084	0.088	0.087	0.093	0.087	0.116	0.085	0.087	0.091	0.09
62.912	0.103	0.098	0.098	0.101	0.132	0.083	0.093	0.149	0.082	0.105	0.085	0.084	0.104	0.098	0.099	0.087	0.098	0.089	0.089	0.101	0.093	0.103	0.089	0.083	0.087	0.098	0.091	0.106	0.101	0.116	0.091	0.096	0.099	0.095	0.09	0.081	0.085	0.096	0.105	0.087	0.087	0.083	0.095	0.089	0.115	0.083	0.084	0.092	0.095
63.626	0.111	0.104	0.099	0.107	0.146	0.088	0.102	0.158	0.084	0.113	0.094	0.076	0.096	0.092	0.089	0.079	0.084	0.072	0.077	0.095	0.077	0.094	0.076	0.08	0.075	0.091	0.085	0.097	0.091	0.118	0.08	0.086	0.087	0.087	0.076	0.076	0.075	0.083	0.091	0.077	0.081	0.077	0.086	0.078	0.097	0.076	0.078	0.081	0.083
64.362	0.112	0.105	0.101	0.111	0.141	0.091	0.102	0.156	0.086	0.111	0.092	0.079	0.096	0.092	0.093	0.078	0.088	0.079	0.078	0.097	0.083	0.095	0.074	0.079	0.075	0.093	0.086	0.099	0.092	0.112	0.078	0.087	0.087	0.086	0.078	0.077	0.075	0.087	0.092	0.073	0.081	0.078	0.085	0.08	0.098	0.076	0.078	0.082	0.083
65.13	0.111	0.105	0.103	0.106	0.145	0.087	0.105	0.162	0.084	0.112	0.096	0.076	0.097	0.089	0.093	0.08	0.089	0.079	0.081	0.097	0.086	0.096	0.076	0.079	0.076	0.094	0.085	0.099	0.092	0.113	0.082	0.089	0.09	0.089	0.081	0.075	0.078	0.088	0.097	0.077	0.08	0.078	0.087	0.082	0.106	0.076	0.076	0.084	0.082
65.881	0.102	0.1	0.096	0.1	0.132	0.084	0.093	0.145	0.08	0.107	0.085	0.082	0.102	0.097	0.104	0.086	0.096	0.083	0.089	0.102	0.092	0.101	0.089	0.084	0.085	0.097	0.091	0.105	0.098	0.118	0.091	0.092	0.097	0.094	0.089	0.08	0.084	0.092	0.101	0.084	0.086	0.083	0.093	0.089	0.11	0.084	0.084	0.089	0.091
66.622	0.11	0.108	0.102	0.108	0.146	0.093	0.101	0.159	0.084	0.113	0.091	0.077	0.098	0.091	0.089	0.079	0.089	0.073	0.078	0.097	0.082	0.094	0.073	0.079	0.076	0.092	0.085	0.099	0.091	0.11	0.083	0.089	0.092	0.087	0.079	0.074	0.075	0.084	0.096	0.078	0.084	0.076	0.087	0.08	0.098	0.077	0.076	0.084	0.086
67.433	0.101	0.098	0.099	0.101	0.126	0.084	0.091	0.145	0.08	0.102	0.085	0.075	0.097	0.087	0.091	0.079	0.085	0.076	0.079	0.097	0.08	0.094	0.076	0.08	0.079	0.09	0.085	0.098	0.093	0.112	0.082	0.086	0.09	0.087	0.081	0.076	0.077	0.086	0.093	0.077	0.084	0.078	0.087	0.08	0.097	0.074	0.079	0.085	0.083
68.214	0.111	0.105	0.102	0.108	0.143	0.091	0.1	0.156	0.085	0.112	0.094	0.084	0.104	0.097	0.099	0.084	0.095	0.084	0.087	0.102	0.096	0.103	0.091	0.086	0.088	0.099	0.092	0.106	0.101	0.122	0.093	0.095	0.097	0.094	0.089	0.083	0.085	0.097	0.103	0.085	0.09	0.087	0.093	0.087	0.115	0.082	0.086	0.09	0.09
68.981	0.109	0.107	0.102	0.107	0.143	0.091	0.101	0.156	0.084	0.113	0.091	0.084	0.106	0.099	0.103	0.086	0.101	0.086	0.095	0.101	0.096	0.105	0.084	0.084	0.087	0.099	0.091	0.104	0.102	0.118	0.092	0.094	0.098	0.094	0.089	0.081	0.086	0.096	0.101	0.084	0.089	0.086	0.09	0.091	0.113	0.083	0.083	0.091	0.093
69.797	0.107	0.106	0.102	0.109	0.145	0.091	0.103	0.159	0.085	0.114	0.092	0.081	0.106	0.098	0.102	0.089	0.099	0.085	0.089	0.101	0.092	0.103	0.087	0.086	0.082	0.097	0.094	0.105	0.101	0.123	0.09	0.095	0.095	0.094	0.088	0.081	0.085	0.097	0.105	0.084	0.089	0.085	0.092	0.086	0.108	0.083	0.084	0.091	0.092
70.58	0.102	0.099	0.094	0.099	0.133	0.085	0.095	0.143	0.08	0.105	0.088	0.08	0.1	0.089	0.091	0.077	0.09	0.075	0.08	0.098	0.081	0.095	0.074	0.08	0.077	0.095	0.084	0.1	0.093	0.116	0.082	0.093	0.09	0.088	0.08	0.073	0.075	0.087	0.094	0.078	0.084	0.078	0.084	0.08	0.093	0.074	0.079	0.082	0.085
71.396	0.099	0.097	0.097	0.101	0.134	0.086	0.094	0.144	0.08	0.104	0.087	0.085	0.107	0.102	0.104	0.085	0.098	0.087	0.09	0.103	0.091	0.102	0.092	0.086	0.086	0.096	0.093	0.105	0.101	0.12	0.09	0.094	0.096	0.094	0.087	0.083	0.085	0.096	0.1	0.085	0.091	0.085	0.091	0.088	0.118	0.083	0.085	0.09	0.093
72.149	0.111	0.106	0.103	0.108	0.141	0.091	0.102	0.158	0.086	0.112	0.093	0.08	0.105	0.099	0.1	0.086	0.097	0.083	0.089	0.101	0.094	0.103	0.085	0.086	0.08	0.097	0.091	0.104	0.1	0.12	0.089	0.095	0.095	0.095	0.089	0.079	0.083	0.094	0.102	0.084	0.09	0.089	0.093	0.089	0.111	0.081	0.084	0.089	0.09
72.901	0.109	0.103	0.102	0.107	0.142	0.091	0.101	0.158	0.086	0.115	0.091	0.078	0.101	0.09	0.093	0.079	0.089	0.074	0.079	0.097	0.085	0.092	0.074	0.081	0.074	0.091	0.086	0.099	0.092	0.112	0.081	0.088	0.092	0.088	0.081	0.076	0.076	0.084	0.094	0.075	0.083	0.077	0.085	0.076	0.1	0.075	0.078	0.083	0.084
73.683	0.108	0.106	0.104	0.107	0.137	0.092	0.102	0.157	0.085	0.113	0.094	0.083	0.109	0.1	0.103	0.087	0.099	0.084	0.091	0.101	0.092	0.104	0.091	0.084	0.084	0.099	0.092	0.107	0.102	0.121	0.09	0.096	0.096	0.093	0.09	0.081	0.086	0.097	0.107	0.084	0.091	0.085	0.093	0.087	0.11	0.082	0.083	0.091	0.089
74.45	0.102	0.098	0.097	0.102	0.126	0.085	0.093	0.15	0.08	0.105	0.084	0.084	0.108	0.102	0.101	0.085	0.097	0.081	0.089	0.102	0.094	0.101	0.089	0.084	0.087	0.097	0.091	0.105	0.102	0.118	0.089	0.097	0.097	0.094	0.09	0.08	0.083	0.096	0.1	0.083	0.089	0.089	0.093	0.087	0.12	0.085	0.083	0.093	0.091
75.203	0.099	0.099	0.097	0.102	0.134	0.087	0.095	0.145	0.08	0.105	0.089	0.078	0.101	0.09	0.091	0.078	0.089	0.076	0.08	0.096	0.084	0.095	0.079	0.079	0.077	0.091	0.086	0.098	0.094	0.111	0.081	0.089	0.091	0.088	0.078	0.073	0.074	0.083	0.092	0.074	0.084	0.078	0.085	0.08	0.1	0.076	0.078	0.081	0.084
75.954	0.103	0.1	0.094	0.103	0.129	0.083	0.094	0.147	0.08	0.104	0.087	0.076	0.103	0.086	0.087	0.077	0.089	0.073	0.08	0.096	0.078	0.093	0.073	0.08	0.077	0.091	0.086	0.097	0.093	0.11	0.081	0.089	0.089	0.087	0.079	0.076	0.076	0.085	0.092	0.073	0.082	0.078	0.087	0.079	0.103	0.074	0.078	0.084	0.086
76.706	0.104	0.1	0.094	0.098	0.131	0.086	0.096	0.15	0.082	0.107	0.085	0.085	0.107	0.102	0.1	0.086	0.099	0.083	0.09	0.102	0.095	0.104	0.09	0.085	0.083	0.097	0.093	0.106	0.097	0.117	0.09	0.096	0.097	0.096	0.091	0.082	0.085	0.096	0.105	0.087	0.09	0.086	0.094	0.085	0.119	0.084	0.083	0.091	0.089
77.458	0.099	0.098	0.095	0.1	0.127	0.085	0.093	0.15	0.081	0.107	0.088	0.076	0.097	0.087	0.091	0.075	0.083	0.072	0.076	0.097	0.081	0.091	0.073	0.08	0.076	0.09	0.084	0.097	0.093	0.113	0.084	0.087	0.088	0.085	0.079	0.075	0.076	0.085	0.093	0.074	0.081	0.078	0.084	0.08	0.101	0.077	0.079	0.082	0.084
78.208	0.113	0.106	0.101	0.108	0.147	0.091	0.101	0.157	0.085	0.113	0.094	0.083	0.105	0.099	0.1	0.086	0.095	0.083	0.09	0.101	0.088	0.103	0.085	0.086	0.084	0.095	0.093	0.103	0.103	0.117	0.09	0.094	0.096	0.095	0.089	0.083	0.083	0.096	0.102	0.083	0.09	0.082	0.093	0.088	0.107	0.083	0.084	0.089	0.091
78.945	0.102	0.101	0.096	0.101	0.133	0.084	0.095	0.151	0.081	0.105	0.087	0.081	0.107	0.098	0.102	0.087	0.096	0.085	0.087	0.102	0.093	0.101	0.085	0.085	0.085	0.098	0.092	0.107	0.101	0.118	0.088	0.096	0.098	0.092	0.091	0.082	0.085	0.094	0.102	0.083	0.088	0.084	0.091	0.088	0.11	0.081	0.084	0.09	0.091
79.696	0.109	0.104	0.1	0.108	0.142	0.091	0.102	0.162	0.086	0.114	0.092	0.083	0.106	0.102	0.1	0.086	0.095	0.084	0.087	0.1	0.094	0.102	0.088	0.084	0.084	0.094	0.09	0.104	0.097	0.119	0.092	0.094	0.099	0.093	0.088	0.082	0.085	0.096	0.102	0.086	0.089	0.084	0.093	0.086	0.112	0.082	0.083	0.088	0.091
80.448	0.108	0.108	0.103	0.11	0.143	0.093	0.101	0.159	0.084	0.112	0.092	0.08	0.097	0.09	0.089	0.079	0.085	0.077	0.075	0.097	0.084	0.095	0.076	0.081	0.074	0.09	0.086	0.099	0.093	0.108	0.083	0.089	0.09	0.09	0.08	0.077	0.074	0.085	0.093	0.075	0.083	0.079	0.086	0.081	0.1	0.076	0.079	0.086	0.084
81.198	0.109	0.108	0.102	0.111	0.144	0.09	0.102	0.159	0.085	0.114	0.095	0.084	0.107	0.099	0.105	0.087	0.098	0.083	0.09	0.101	0.094	0.101	0.091	0.087	0.085	0.098	0.092	0.105	0.099	0.113	0.088	0.098	0.095	0.093	0.091	0.083	0.088	0.101	0.101	0.083	0.088	0.084	0.094	0.087	0.105	0.084	0.087	0.091	0.092
81.95	0.11	0.109	0.103	0.109	0.143	0.093	0.102	0.159	0.086	0.112	0.092	0.085	0.108	0.097	0.102	0.087	0.096	0.083	0.09	0.101	0.093	0.101	0.091	0.086	0.085	0.096	0.093	0.106	0.099	0.115	0.088	0.097	0.099	0.095	0.085	0.082	0.084	0.096	0.101	0.083	0.088	0.083	0.092	0.086	0.115	0.081	0.087	0.09	0.089
82.685	0.105	0.103	0.095	0.099	0.133	0.087	0.094	0.151	0.081	0.107	0.087	0.085	0.11	0.099	0.1	0.084	0.1	0.086	0.09	0.102	0.097	0.104	0.087	0.087	0.086	0.097	0.092	0.107	0.101	0.124	0.091	0.096	0.097	0.094	0.089	0.081	0.087	0.098	0.105	0.084	0.091	0.085	0.094	0.086	0.117	0.083	0.088	0.091	0.091
83.437	0.103	0.101	0.097	0.1	0.132	0.085	0.094	0.148	0.081	0.106	0.085	0.083	0.108	0.098	0.101	0.088	0.099	0.086	0.09	0.103	0.091	0.099	0.087	0.087	0.081	0.097	0.092	0.104	0.098	0.12	0.09	0.098	0.096	0.095	0.091	0.081	0.083	0.094	0.107	0.085	0.089	0.084	0.094	0.087	0.113	0.082	0.081	0.09	0.091
84.173	0.1	0.104	0.097	0.101	0.133	0.082	0.094	0.151	0.081	0.105	0.089	0.084	0.108	0.098	0.1	0.083	0.099	0.083	0.088	0.1	0.092	0.101	0.087	0.086	0.083	0.098	0.092	0.106	0.101	0.122	0.089	0.097	0.096	0.094	0.085	0.083	0.083	0.094	0.101	0.081	0.09	0.086	0.093	0.088	0.11	0.083	0.086	0.088	0.093
84.908	0.114	0.109	0.103	0.112	0.142	0.091	0.103	0.164	0.085	0.115	0.092	0.082	0.108	0.101	0.104	0.086	0.096	0.084	0.091	0.102	0.092	0.101	0.085	0.085	0.084	0.097	0.092	0.105	0.097	0.116	0.086	0.096	0.097	0.093	0.09	0.08	0.089	0.097	0.109	0.083	0.093	0.081	0.092	0.087	0.113	0.081	0.083	0.092	0.092
85.644	0.114	0.11	0.105	0.11	0.144	0.091	0.103	0.164	0.087	0.113	0.092	0.084	0.108	0.101	0.101	0.085	0.097	0.082	0.09	0.1	0.095	0.103	0.09	0.084	0.085	0.097	0.093	0.105	0.101	0.121	0.088	0.097	0.097	0.093	0.088	0.081	0.083	0.098	0.099	0.085	0.09	0.08	0.091	0.088	0.113	0.083	0.084	0.089	0.09
86.396	0.102	0.101	0.098	0.101	0.132	0.085	0.099	0.145	0.081	0.105	0.089	0.076	0.1	0.088	0.091	0.077	0.088	0.074	0.078	0.097	0.086	0.095	0.077	0.08	0.077	0.091	0.086	0.1	0.09	0.113	0.082	0.088	0.092	0.088	0.079	0.071	0.077	0.086	0.097	0.074	0.084	0.078	0.087	0.081	0.097	0.075	0.082	0.084	0.083
87.131	0.113	0.107	0.105	0.109	0.143	0.09	0.104	0.161	0.085	0.114	0.094	0.078	0.101	0.089	0.089	0.075	0.087	0.072	0.076	0.097	0.079	0.089	0.072	0.079	0.073	0.091	0.085	0.097	0.093	0.112	0.079	0.088	0.088	0.089	0.084	0.075	0.08	0.09	0.096	0.079	0.085	0.08	0.086	0.08	0.099	0.076	0.078	0.084	0.089
87.866	0.105	0.1	0.101	0.101	0.132	0.086	0.094	0.15	0.081	0.106	0.087	0.085	0.109	0.104	0.104	0.086	0.096	0.083	0.088	0.102	0.093	0.105	0.086	0.086	0.086	0.099	0.091	0.105	0.101	0.123	0.092	0.097	0.097	0.094	0.088	0.082	0.083	0.097	0.101	0.084	0.09	0.083	0.093	0.089	0.112	0.082	0.085	0.09	0.09
88.651	0.112	0.107	0.104	0.11	0.144	0.092	0.101	0.162	0.086	0.113	0.095	0.079	0.102	0.09	0.093	0.081	0.087	0.073	0.074	0.097	0.081	0.09	0.077	0.079	0.076	0.092	0.086	0.099	0.096	0.113	0.084	0.09	0.09	0.088	0.08	0.076	0.078	0.089	0.095	0.076	0.083	0.076	0.087	0.078	0.103	0.077	0.077	0.085	0.086
89.384	0.104	0.099	0.097	0.1	0.131	0.085	0.095	0.152	0.081	0.105	0.088	0.084	0.11	0.099	0.103	0.088	0.097	0.086	0.089	0.103	0.094	0.101	0.089	0.086	0.087	0.096	0.093	0.105	0.099	0.117	0.088	0.096	0.098	0.093	0.089	0.083	0.085	0.095	0.099	0.083	0.089	0.083	0.094	0.084	0.113	0.084	0.084	0.089	0.089
90.12	0.111	0.106	0.107	0.112	0.141	0.093	0.105	0.163	0.085	0.113	0.093	0.082	0.107	0.099	0.103	0.085	0.098	0.084	0.086	0.102	0.093	0.099	0.088	0.086	0.085	0.096	0.092	0.105	0.102	0.118	0.089	0.093	0.096	0.094	0.09	0.084	0.086	0.097	0.104	0.083	0.092	0.086	0.092	0.089	0.112	0.082	0.084	0.09	0.092
90.889	0.104	0.1	0.098	0.101	0.131	0.087	0.094	0.152	0.081	0.107	0.09	0.08	0.108	0.1	0.097	0.084	0.095	0.081	0.088	0.102	0.095	0.103	0.085	0.085	0.087	0.098	0.092	0.104	0.101	0.111	0.086	0.095	0.098	0.093	0.089	0.082	0.086	0.098	0.105	0.082	0.088	0.088	0.093	0.091	0.101	0.08	0.087	0.088	0.093
91.656	0.113	0.108	0.104	0.11	0.141	0.093	0.102	0.162	0.087	0.114	0.089	0.083	0.11	0.099	0.1	0.086	0.097	0.085	0.091	0.101	0.093	0.101	0.091	0.086	0.084	0.098	0.093	0.105	0.1	0.116	0.09	0.096	0.097	0.093	0.087	0.081	0.087	0.097	0.106	0.083	0.091	0.083	0.093	0.084	0.109	0.082	0.084	0.091	0.089
92.456	0.113	0.108	0.105	0.112	0.138	0.09	0.104	0.162	0.087	0.112	0.093	0.086	0.11	0.098	0.098	0.084	0.097	0.086	0.091	0.103	0.095	0.104	0.09	0.086	0.084	0.098	0.092	0.105	0.101	0.117	0.088	0.097	0.096	0.096	0.088	0.084	0.088	0.098	0.106	0.084	0.091	0.084	0.092	0.085	0.112	0.083	0.087	0.09	0.093
93.206	0.104	0.099	0.097	0.103	0.13	0.088	0.094	0.151	0.081	0.108	0.086	0.086	0.107	0.1	0.1	0.086	0.097	0.082	0.09	0.102	0.09	0.102	0.086	0.087	0.084	0.098	0.093	0.108	0.101	0.114	0.089	0.098	0.099	0.095	0.087	0.083	0.083	0.097	0.102	0.084	0.091	0.085	0.094	0.088	0.107	0.08	0.085	0.09	0.091
93.943	0.105	0.1	0.098	0.102	0.125	0.087	0.095	0.146	0.08	0.106	0.089	0.084	0.107	0.097	0.099	0.086	0.097	0.084	0.089	0.102	0.094	0.104	0.09	0.085	0.083	0.097	0.091	0.106	0.102	0.116	0.089	0.096	0.098	0.094	0.089	0.083	0.087	0.1	0.103	0.09	0.09	0.086	0.094	0.088	0.11	0.081	0.087	0.09	0.092
94.695	0.104	0.099	0.097	0.104	0.131	0.086	0.095	0.155	0.08	0.11	0.091	0.082	0.107	0.102	0.098	0.087	0.095	0.085	0.088	0.102	0.091	0.102	0.091	0.086	0.086	0.1	0.092	0.107	0.102	0.114	0.089	0.099	0.097	0.097	0.091	0.083	0.086	0.099	0.103	0.084	0.092	0.084	0.094	0.083	0.116	0.084	0.087	0.09	0.091
95.445	0.102	0.099	0.096	0.101	0.127	0.086	0.093	0.147	0.081	0.107	0.087	0.076	0.1	0.09	0.093	0.08	0.088	0.073	0.079	0.098	0.082	0.095	0.078	0.082	0.077	0.092	0.085	0.099	0.093	0.11	0.08	0.089	0.091	0.088	0.078	0.075	0.076	0.089	0.093	0.075	0.085	0.074	0.086	0.079	0.101	0.075	0.08	0.083	0.086
96.198	0.113	0.105	0.104	0.111	0.141	0.092	0.103	0.16	0.087	0.114	0.095	0.083	0.11	0.1	0.098	0.085	0.099	0.078	0.087	0.102	0.089	0.101	0.087	0.085	0.086	0.098	0.091	0.105	0.101	0.109	0.093	0.094	0.097	0.093	0.089	0.08	0.087	0.096	0.103	0.085	0.089	0.083	0.09	0.087	0.118	0.086	0.086	0.09	0.089
96.933	0.11	0.107	0.106	0.11	0.143	0.091	0.103	0.16	0.087	0.112	0.093	0.078	0.099	0.089	0.089	0.079	0.089	0.073	0.078	0.097	0.077	0.091	0.076	0.08	0.075	0.093	0.086	0.101	0.095	0.11	0.084	0.087	0.091	0.089	0.079	0.075	0.075	0.084	0.094	0.077	0.085	0.078	0.086	0.075	0.098	0.075	0.081	0.083	0.08
97.78	0.101	0.103	0.097	0.101	0.131	0.087	0.093	0.146	0.083	0.104	0.087	0.077	0.099	0.089	0.088	0.077	0.084	0.074	0.076	0.098	0.079	0.087	0.077	0.078	0.075	0.093	0.085	0.099	0.095	0.109	0.08	0.09	0.09	0.087	0.078	0.075	0.077	0.087	0.097	0.075	0.083	0.077	0.086	0.079	0.099	0.077	0.081	0.084	0.083
98.516	0.113	0.109	0.106	0.112	0.146	0.093	0.102	0.157	0.087	0.112	0.093	0.083	0.106	0.102	0.103	0.086	0.1	0.087	0.09	0.104	0.093	0.1	0.092	0.086	0.087	0.098	0.095	0.105	0.1	0.119	0.089	0.098	0.1	0.095	0.09	0.08	0.084	0.098	0.106	0.086	0.089	0.085	0.093	0.084	0.11	0.084	0.09	0.09	0.092
99.283	0.103	0.102	0.1	0.102	0.13	0.085	0.096	0.147	0.082	0.104	0.09	0.081	0.109	0.097	0.101	0.086	0.095	0.082	0.086	0.103	0.095	0.102	0.088	0.086	0.087	0.099	0.092	0.105	0.1	0.112	0.087	0.094	0.097	0.094	0.089	0.08	0.084	0.099	0.108	0.083	0.093	0.086	0.094	0.085	0.108	0.082	0.084	0.09	0.091
100.003	0.104	0.1	0.1	0.104	0.127	0.084	0.093	0.145	0.079	0.105	0.084	0.084	0.11	0.099	0.101	0.086	0.096	0.081	0.088	0.102	0.094	0.102	0.088	0.085	0.087	0.097	0.093	0.107	0.1	0.119	0.088	0.095	0.098	0.095	0.088	0.083	0.087	0.099	0.107	0.083	0.091	0.084	0.092	0.086	0.117	0.085	0.089	0.092	0.09
100.738	0.112	0.108	0.105	0.112	0.145	0.09	0.105	0.156	0.086	0.113	0.096	0.084	0.106	0.096	0.098	0.085	0.095	0.085	0.088	0.103	0.09	0.101	0.088	0.085	0.085	0.098	0.092	0.104	0.104	0.112	0.089	0.096	0.098	0.094	0.089	0.082	0.084	0.095	0.103	0.086	0.089	0.083	0.092	0.088	0.108	0.083	0.086	0.09	0.088
101.569	0.112	0.11	0.105	0.112	0.145	0.092	0.103	0.158	0.086	0.113	0.096	0.079	0.098	0.087	0.089	0.077	0.087	0.072	0.079	0.098	0.08	0.09	0.075	0.077	0.075	0.089	0.086	0.096	0.094	0.108	0.08	0.088	0.094	0.089	0.082	0.075	0.08	0.087	0.096	0.076	0.085	0.078	0.088	0.081	0.102	0.077	0.085	0.083	0.088
102.305	0.111	0.108	0.105	0.11	0.145	0.092	0.103	0.158	0.087	0.113	0.095	0.083	0.107	0.099	0.098	0.086	0.096	0.08	0.089	0.104	0.091	0.102	0.086	0.085	0.082	0.098	0.092	0.107	0.098	0.114	0.091	0.096	0.1	0.095	0.091	0.079	0.085	0.1	0.104	0.081	0.088	0.084	0.091	0.087	0.108	0.082	0.085	0.089	0.089
103.041	0.113	0.108	0.105	0.112	0.144	0.093	0.104	0.156	0.086	0.113	0.095	0.074	0.096	0.093	0.087	0.077	0.085	0.074	0.076	0.098	0.083	0.093	0.08	0.08	0.075	0.092	0.087	0.098	0.097	0.111	0.08	0.088	0.089	0.087	0.084	0.074	0.081	0.09	0.099	0.077	0.083	0.079	0.086	0.078	0.097	0.075	0.083	0.082	0.083
103.856	0.104	0.1	0.098	0.103	0.133	0.088	0.091	0.145	0.081	0.107	0.086	0.085	0.107	0.097	0.099	0.086	0.097	0.084	0.088	0.103	0.09	0.102	0.087	0.086	0.084	0.098	0.093	0.105	0.1	0.114	0.088	0.096	0.096	0.095	0.088	0.083	0.084	0.096	0.105	0.082	0.089	0.084	0.093	0.084	0.108	0.083	0.089	0.087	0.089
104.686	0.112	0.109	0.106	0.112	0.147	0.09	0.102	0.157	0.086	0.114	0.094	0.085	0.108	0.1	0.096	0.086	0.098	0.082	0.089	0.103	0.094	0.102	0.09	0.086	0.086	0.098	0.094	0.107	0.1	0.117	0.088	0.093	0.101	0.094	0.093	0.081	0.085	0.101	0.107	0.084	0.09	0.082	0.094	0.087	0.106	0.083	0.092	0.089	0.089
105.46	0.111	0.108	0.103	0.112	0.146	0.094	0.101	0.155	0.088	0.113	0.095	0.086	0.103	0.099	0.097	0.084	0.098	0.084	0.087	0.102	0.093	0.099	0.084	0.085	0.082	0.097	0.093	0.105	0.099	0.113	0.086	0.096	0.098	0.094	0.093	0.079	0.086	0.1	0.101	0.082	0.09	0.08	0.094	0.084	0.113	0.082	0.087	0.087	0.09
106.208	0.102	0.102	0.098	0.101	0.136	0.086	0.093	0.148	0.081	0.107	0.087	0.083	0.108	0.1	0.101	0.085	0.099	0.086	0.09	0.104	0.092	0.101	0.088	0.085	0.084	0.096	0.093	0.105	0.105	0.116	0.093	0.097	0.102	0.095	0.092	0.083	0.086	0.1	0.106	0.083	0.093	0.085	0.094	0.084	0.115	0.084	0.091	0.09	0.092
106.959	0.105	0.102	0.098	0.103	0.133	0.086	0.093	0.147	0.084	0.107	0.088	0.084	0.106	0.1	0.102	0.087	0.098	0.082	0.085	0.103	0.093	0.101	0.084	0.086	0.09	0.099	0.094	0.106	0.101	0.111	0.092	0.099	0.099	0.094	0.088	0.082	0.083	0.096	0.101	0.085	0.091	0.083	0.092	0.085	0.107	0.082	0.084	0.089	0.089
107.806	0.102	0.103	0.097	0.105	0.136	0.088	0.098	0.146	0.081	0.106	0.087	0.076	0.098	0.09	0.092	0.077	0.088	0.073	0.082	0.097	0.079	0.09	0.076	0.08	0.073	0.091	0.084	0.099	0.093	0.11	0.08	0.089	0.089	0.09	0.08	0.075	0.073	0.086	0.092	0.076	0.082	0.074	0.086	0.077	0.096	0.074	0.079	0.081	0.086
108.571	0.111	0.109	0.104	0.114	0.145	0.096	0.103	0.156	0.088	0.114	0.096	0.075	0.098	0.09	0.089	0.075	0.089	0.072	0.08	0.098	0.084	0.093	0.076	0.079	0.078	0.092	0.083	0.1	0.094	0.109	0.083	0.09	0.091	0.09	0.082	0.076	0.074	0.085	0.093	0.074	0.081	0.073	0.086	0.083	0.102	0.076	0.08	0.083	0.085
109.405	0.104	0.103	0.098	0.103	0.135	0.086	0.096	0.144	0.082	0.107	0.088	0.084	0.105	0.098	0.1	0.083	0.099	0.084	0.091	0.102	0.095	0.099	0.087	0.085	0.084	0.097	0.092	0.103	0.102	0.117	0.088	0.098	0.1	0.095	0.09	0.081	0.086	0.101	0.106	0.084	0.088	0.083	0.093	0.085	0.117	0.083	0.087	0.089	0.089
110.188	0.112	0.107	0.107	0.114	0.148	0.093	0.105	0.159	0.088	0.116	0.096	0.083	0.105	0.1	0.099	0.086	0.099	0.085	0.09	0.103	0.09	0.1	0.086	0.087	0.087	0.098	0.094	0.104	0.103	0.124	0.088	0.099	0.101	0.094	0.088	0.082	0.086	0.098	0.103	0.082	0.092	0.083	0.093	0.088	0.112	0.082	0.089	0.089	0.089
110.985	0.11	0.109	0.106	0.113	0.144	0.092	0.104	0.155	0.088	0.114	0.097	0.084	0.103	0.097	0.099	0.085	0.097	0.082	0.089	0.103	0.09	0.101	0.086	0.084	0.085	0.097	0.092	0.104	0.104	0.114	0.089	0.1	0.1	0.094	0.091	0.08	0.087	0.1	0.106	0.082	0.089	0.083	0.091	0.087	0.115	0.083	0.083	0.091	0.091
111.881	0.105	0.104	0.098	0.104	0.137	0.087	0.093	0.151	0.083	0.107	0.088	0.083	0.105	0.098	0.101	0.083	0.096	0.088	0.088	0.102	0.09	0.103	0.087	0.086	0.084	0.1	0.094	0.105	0.101	0.118	0.09	0.098	0.097	0.094	0.086	0.082	0.086	0.101	0.101	0.084	0.091	0.083	0.094	0.085	0.113	0.083	0.086	0.091	0.087
112.65	0.104	0.102	0.101	0.104	0.14	0.089	0.097	0.143	0.084	0.106	0.09	0.079	0.097	0.091	0.091	0.078	0.088	0.071	0.081	0.097	0.086	0.096	0.079	0.08	0.077	0.093	0.087	0.1	0.094	0.108	0.082	0.091	0.097	0.091	0.084	0.078	0.08	0.094	0.098	0.074	0.085	0.077	0.088	0.081	0.095	0.076	0.077	0.081	0.083
113.403	0.103	0.101	0.101	0.106	0.141	0.085	0.098	0.151	0.084	0.105	0.09	0.08	0.106	0.1	0.101	0.084	0.097	0.084	0.09	0.103	0.092	0.102	0.088	0.085	0.083	0.096	0.094	0.105	0.101	0.11	0.088	0.097	0.1	0.095	0.091	0.082	0.086	0.099	0.106	0.086	0.09	0.083	0.092	0.091	0.11	0.083	0.085	0.09	0.092
114.154	0.105	0.103	0.101	0.104	0.141	0.086	0.097	0.146	0.083	0.108	0.088	0.081	0.106	0.098	0.098	0.083	0.095	0.082	0.088	0.101	0.093	0.103	0.09	0.086	0.087	0.098	0.094	0.105	0.099	0.116	0.087	0.095	0.099	0.092	0.091	0.082	0.09	0.101	0.104	0.083	0.09	0.083	0.091	0.09	0.103	0.082	0.086	0.091	0.09
114.935	0.104	0.103	0.098	0.102	0.139	0.087	0.097	0.144	0.084	0.11	0.091	0.082	0.104	0.101	0.1	0.086	0.097	0.086	0.087	0.102	0.09	0.101	0.088	0.083	0.084	0.097	0.093	0.101	0.099	0.114	0.089	0.097	0.099	0.094	0.092	0.083	0.086	0.099	0.106	0.08	0.09	0.085	0.092	0.089	0.105	0.082	0.086	0.09	0.091
115.688	0.104	0.105	0.099	0.103	0.135	0.089	0.096	0.143	0.084	0.108	0.092	0.076	0.098	0.089	0.091	0.081	0.087	0.074	0.077	0.098	0.078	0.091	0.076	0.081	0.076	0.092	0.086	0.098	0.093	0.112	0.079	0.089	0.092	0.088	0.08	0.076	0.074	0.089	0.094	0.076	0.082	0.075	0.085	0.08	0.111	0.077	0.076	0.08	0.081
116.44	0.105	0.104	0.1	0.105	0.143	0.087	0.099	0.142	0.084	0.109	0.089	0.082	0.107	0.098	0.098	0.085	0.098	0.082	0.088	0.102	0.093	0.102	0.088	0.085	0.086	0.098	0.093	0.104	0.103	0.116	0.087	0.097	0.101	0.092	0.089	0.082	0.083	0.094	0.104	0.083	0.092	0.086	0.094	0.087	0.109	0.082	0.086	0.09	0.09
117.205	0.115	0.11	0.105	0.113	0.148	0.096	0.103	0.155	0.089	0.114	0.098	0.083	0.103	0.097	0.101	0.086	0.097	0.084	0.087	0.103	0.091	0.103	0.084	0.086	0.088	0.099	0.094	0.103	0.098	0.114	0.086	0.096	0.099	0.092	0.091	0.084	0.086	0.101	0.102	0.083	0.091	0.084	0.09	0.091	0.111	0.083	0.087	0.088	0.089
117.963	0.105	0.106	0.097	0.104	0.143	0.087	0.098	0.144	0.084	0.108	0.091	0.081	0.104	0.098	0.102	0.085	0.098	0.083	0.089	0.103	0.092	0.1	0.088	0.085	0.087	0.098	0.094	0.104	0.101	0.117	0.092	0.098	0.1	0.094	0.092	0.081	0.087	0.098	0.103	0.082	0.089	0.088	0.092	0.089	0.109	0.082	0.086	0.087	0.092
118.726	0.11	0.104	0.098	0.103	0.14	0.089	0.098	0.145	0.084	0.109	0.092	0.084	0.103	0.1	0.099	0.086	0.099	0.09	0.089	0.103	0.09	0.101	0.089	0.086	0.083	0.098	0.093	0.102	0.098	0.113	0.091	0.097	0.102	0.095	0.09	0.081	0.089	0.101	0.107	0.083	0.088	0.085	0.092	0.089	0.11	0.083	0.087	0.088	0.092
119.542	0.107	0.103	0.097	0.106	0.138	0.09	0.098	0.143	0.083	0.108	0.09	0.083	0.104	0.1	0.103	0.083	0.098	0.085	0.087	0.103	0.092	0.101	0.087	0.089	0.085	0.098	0.093	0.105	0.098	0.119	0.089	0.095	0.097	0.095	0.09	0.084	0.085	0.098	0.103	0.083	0.09	0.083	0.094	0.087	0.118	0.081	0.084	0.088	0.09
120.294	0.107	0.104	0.098	0.106	0.141	0.088	0.098	0.14	0.084	0.107	0.092	0.084	0.106	0.098	0.099	0.085	0.097	0.085	0.089	0.104	0.094	0.104	0.089	0.085	0.086	0.098	0.092	0.104	0.103	0.113	0.089	0.097	0.097	0.093	0.092	0.082	0.088	0.099	0.105	0.08	0.088	0.086	0.095	0.09	0.111	0.084	0.085	0.089	0.087
121.061	0.107	0.102	0.1	0.101	0.137	0.087	0.096	0.145	0.084	0.108	0.089	0.081	0.106	0.099	0.102	0.088	0.096	0.085	0.085	0.103	0.093	0.102	0.087	0.086	0.088	0.098	0.094	0.105	0.099	0.111	0.091	0.095	0.1	0.095	0.092	0.082	0.086	0.097	0.102	0.08	0.094	0.086	0.092	0.088	0.12	0.087	0.084	0.09	0.092
121.89	0.109	0.106	0.097	0.106	0.137	0.089	0.099	0.146	0.082	0.109	0.093	0.084	0.104	0.101	0.098	0.086	0.097	0.087	0.088	0.104	0.092	0.102	0.087	0.086	0.085	0.099	0.092	0.104	0.102	0.115	0.089	0.097	0.098	0.096	0.09	0.08	0.087	0.098	0.106	0.083	0.091	0.087	0.092	0.089	0.113	0.084	0.086	0.09	0.089
122.709	0.11	0.104	0.098	0.107	0.142	0.089	0.096	0.142	0.085	0.106	0.087	0.083	0.106	0.101	0.101	0.085	0.1	0.081	0.089	0.103	0.088	0.101	0.089	0.086	0.084	0.095	0.093	0.105	0.101	0.114	0.092	0.095	0.1	0.094	0.09	0.082	0.087	0.097	0.106	0.084	0.089	0.086	0.092	0.087	0.103	0.087	0.085	0.089	0.089
123.54	0.11	0.105	0.097	0.105	0.139	0.088	0.098	0.144	0.084	0.108	0.089	0.084	0.105	0.099	0.098	0.085	0.097	0.083	0.091	0.103	0.093	0.101	0.089	0.085	0.087	0.098	0.091	0.103	0.101	0.113	0.092	0.097	0.1	0.094	0.092	0.083	0.089	0.101	0.107	0.086	0.09	0.088	0.093	0.084	0.11	0.086	0.088	0.089	0.09
124.387	0.11	0.104	0.1	0.106	0.136	0.091	0.096	0.139	0.083	0.107	0.089	0.082	0.106	0.098	0.099	0.086	0.096	0.085	0.09	0.104	0.087	0.099	0.087	0.087	0.086	0.097	0.094	0.103	0.097	0.114	0.088	0.095	0.1	0.094	0.088	0.082	0.087	0.102	0.1	0.083	0.088	0.086	0.094	0.088	0.104	0.083	0.088	0.088	0.092
125.121	0.11	0.103	0.098	0.109	0.138	0.089	0.098	0.144	0.083	0.109	0.088	0.085	0.108	0.097	0.101	0.083	0.097	0.083	0.091	0.105	0.094	0.104	0.089	0.086	0.085	0.097	0.094	0.104	0.103	0.113	0.088	0.1	0.099	0.097	0.092	0.082	0.091	0.102	0.106	0.083	0.092	0.086	0.095	0.091	0.114	0.085	0.087	0.091	0.09
125.893	0.11	0.104	0.1	0.107	0.141	0.089	0.099	0.141	0.083	0.107	0.093	0.081	0.106	0.096	0.099	0.085	0.096	0.087	0.086	0.104	0.092	0.102	0.085	0.084	0.087	0.097	0.092	0.103	0.1	0.111	0.091	0.097	0.101	0.096	0.091	0.083	0.084	0.098	0.103	0.085	0.09	0.088	0.092	0.085	0.106	0.082	0.084	0.09	0.09
126.688	0.115	0.115	0.104	0.114	0.146	0.096	0.105	0.157	0.089	0.117	0.097	0.081	0.106	0.098	0.098	0.084	0.096	0.087	0.084	0.104	0.095	0.105	0.082	0.085	0.087	0.096	0.092	0.104	0.1	0.117	0.087	0.099	0.097	0.095	0.092	0.082	0.086	0.096	0.102	0.086	0.087	0.087	0.095	0.089	0.115	0.085	0.085	0.091	0.088
127.425	0.11	0.104	0.097	0.105	0.137	0.091	0.097	0.141	0.082	0.109	0.087	0.082	0.105	0.096	0.1	0.085	0.097	0.08	0.089	0.103	0.089	0.1	0.088	0.086	0.087	0.096	0.091	0.105	0.099	0.117	0.089	0.096	0.099	0.096	0.09	0.084	0.088	0.101	0.103	0.083	0.091	0.086	0.093	0.089	0.108	0.084	0.084	0.087	0.091
128.164	0.109	0.104	0.097	0.103	0.136	0.086	0.095	0.139	0.083	0.109	0.088	0.084	0.105	0.099	0.097	0.086	0.101	0.084	0.088	0.104	0.091	0.101	0.088	0.085	0.086	0.096	0.094	0.104	0.101	0.114	0.087	0.097	0.1	0.095	0.093	0.084	0.085	0.097	0.103	0.082	0.091	0.089	0.092	0.086	0.112	0.084	0.085	0.088	0.087
128.911	0.118	0.11	0.107	0.113	0.15	0.095	0.107	0.151	0.087	0.117	0.095	0.083	0.105	0.098	0.101	0.084	0.098	0.085	0.087	0.104	0.09	0.101	0.088	0.084	0.085	0.097	0.091	0.105	0.101	0.106	0.088	0.098	0.1	0.095	0.093	0.086	0.088	0.095	0.1	0.083	0.089	0.085	0.095	0.087	0.116	0.082	0.085	0.091	0.09
129.647	0.116	0.11	0.107	0.115	0.151	0.094	0.107	0.152	0.089	0.114	0.096	0.088	0.108	0.1	0.1	0.086	0.1	0.084	0.089	0.104	0.09	0.103	0.085	0.086	0.086	0.096	0.093	0.102	0.1	0.108	0.088	0.099	0.1	0.095	0.09	0.084	0.087	0.1	0.105	0.084	0.091	0.085	0.096	0.087	0.105	0.086	0.086	0.09	0.089
130.387	0.117	0.111	0.108	0.115	0.15	0.097	0.109	0.154	0.088	0.116	0.097	0.083	0.107	0.097	0.098	0.087	0.097	0.087	0.089	0.104	0.092	0.104	0.086	0.085	0.085	0.095	0.093	0.104	0.1	0.113	0.091	0.097	0.101	0.095	0.091	0.083	0.087	0.098	0.105	0.085	0.093	0.084	0.092	0.088	0.117	0.083	0.084	0.089	0.093
131.124	0.111	0.106	0.101	0.107	0.137	0.09	0.102	0.142	0.083	0.109	0.091	0.083	0.109	0.098	0.099	0.086	0.098	0.088	0.09	0.103	0.089	0.102	0.087	0.087	0.083	0.094	0.09	0.104	0.1	0.116	0.088	0.098	0.101	0.094	0.09	0.082	0.086	0.097	0.103	0.083	0.091	0.085	0.094	0.088	0.111	0.084	0.084	0.091	0.091
131.891	0.112	0.103	0.1	0.103	0.137	0.087	0.1	0.144	0.082	0.109	0.09	0.084	0.104	0.096	0.097	0.084	0.095	0.082	0.085	0.104	0.089	0.1	0.086	0.086	0.085	0.097	0.093	0.103	0.101	0.114	0.088	0.096	0.1	0.095	0.092	0.082	0.089	0.099	0.105	0.081	0.089	0.086	0.094	0.089	0.111	0.084	0.086	0.087	0.092
132.654	0.11	0.102	0.099	0.105	0.138	0.088	0.101	0.142	0.081	0.109	0.091	0.084	0.106	0.099	0.099	0.084	0.099	0.081	0.088	0.103	0.089	0.101	0.088	0.084	0.082	0.096	0.09	0.103	0.102	0.114	0.088	0.096	0.098	0.093	0.086	0.08	0.084	0.099	0.102	0.084	0.091	0.087	0.093	0.087	0.115	0.084	0.083	0.091	0.086
133.405	0.119	0.11	0.107	0.114	0.154	0.1	0.107	0.15	0.088	0.114	0.097	0.08	0.104	0.1	0.098	0.086	0.097	0.084	0.09	0.104	0.088	0.1	0.086	0.084	0.083	0.097	0.091	0.103	0.098	0.114	0.087	0.096	0.098	0.095	0.088	0.083	0.084	0.096	0.101	0.085	0.087	0.084	0.091	0.087	0.11	0.083	0.083	0.086	0.09
134.189	0.108	0.103	0.097	0.101	0.134	0.087	0.099	0.142	0.082	0.108	0.09	0.076	0.099	0.085	0.09	0.077	0.088	0.074	0.078	0.099	0.081	0.091	0.079	0.081	0.077	0.091	0.085	0.099	0.091	0.107	0.079	0.089	0.091	0.087	0.079	0.077	0.074	0.088	0.091	0.076	0.084	0.074	0.085	0.08	0.104	0.077	0.077	0.082	0.081
134.941	0.107	0.108	0.1	0.106	0.135	0.086	0.098	0.143	0.082	0.108	0.087	0.077	0.099	0.087	0.087	0.079	0.088	0.07	0.076	0.1	0.082	0.094	0.07	0.079	0.075	0.09	0.083	0.097	0.093	0.11	0.08	0.088	0.092	0.086	0.079	0.075	0.076	0.084	0.097	0.074	0.081	0.079	0.087	0.079	0.093	0.076	0.077	0.083	0.083
135.692	0.107	0.105	0.102	0.104	0.141	0.087	0.1	0.143	0.084	0.109	0.091	0.084	0.105	0.101	0.098	0.086	0.095	0.088	0.085	0.103	0.093	0.1	0.086	0.086	0.085	0.097	0.092	0.102	0.103	0.114	0.089	0.098	0.101	0.093	0.089	0.082	0.085	0.096	0.103	0.085	0.086	0.086	0.093	0.087	0.11	0.083	0.086	0.088	0.092
136.428	0.109	0.104	0.1	0.105	0.139	0.087	0.1	0.143	0.084	0.11	0.091	0.077	0.098	0.091	0.092	0.08	0.087	0.071	0.078	0.1	0.078	0.092	0.078	0.081	0.077	0.092	0.085	0.096	0.093	0.103	0.081	0.091	0.092	0.088	0.08	0.076	0.076	0.087	0.094	0.078	0.083	0.078	0.086	0.081	0.097	0.078	0.079	0.081	0.084
137.163	0.117	0.11	0.107	0.116	0.147	0.097	0.108	0.15	0.09	0.114	0.094	0.082	0.107	0.1	0.099	0.085	0.098	0.08	0.088	0.105	0.092	0.101	0.088	0.086	0.087	0.096	0.092	0.104	0.1	0.116	0.089	0.094	0.1	0.095	0.086	0.083	0.085	0.095	0.1	0.082	0.086	0.081	0.092	0.087	0.107	0.084	0.083	0.088	0.092
137.899	0.117	0.111	0.108	0.118	0.148	0.095	0.109	0.146	0.089	0.114	0.097	0.084	0.105	0.098	0.099	0.084	0.097	0.083	0.086	0.104	0.092	0.1	0.087	0.087	0.086	0.094	0.09	0.102	0.1	0.112	0.087	0.096	0.099	0.093	0.089	0.083	0.084	0.097	0.101	0.084	0.089	0.085	0.092	0.088	0.112	0.085	0.086	0.089	0.091
138.65	0.107	0.104	0.099	0.105	0.138	0.091	0.098	0.142	0.083	0.109	0.092	0.085	0.104	0.098	0.098	0.084	0.096	0.083	0.088	0.104	0.09	0.099	0.084	0.086	0.084	0.094	0.091	0.103	0.1	0.114	0.089	0.097	0.099	0.094	0.088	0.082	0.085	0.097	0.1	0.082	0.088	0.083	0.094	0.089	0.114	0.083	0.083	0.088	0.09
139.386	0.112	0.103	0.102	0.106	0.135	0.088	0.098	0.137	0.082	0.105	0.088	0.087	0.103	0.099	0.096	0.084	0.094	0.08	0.087	0.104	0.092	0.103	0.086	0.087	0.084	0.095	0.092	0.105	0.1	0.117	0.089	0.095	0.098	0.092	0.09	0.083	0.086	0.097	0.105	0.082	0.091	0.084	0.092	0.09	0.11	0.085	0.086	0.089	0.09
140.138	0.108	0.105	0.1	0.104	0.138	0.086	0.099	0.14	0.083	0.109	0.091	0.082	0.105	0.095	0.099	0.088	0.096	0.081	0.091	0.104	0.093	0.104	0.092	0.088	0.088	0.097	0.092	0.106	0.101	0.115	0.091	0.095	0.099	0.095	0.087	0.083	0.084	0.098	0.102	0.082	0.087	0.088	0.094	0.085	0.11	0.086	0.083	0.087	0.09
140.856	0.117	0.111	0.106	0.116	0.152	0.095	0.107	0.149	0.087	0.116	0.094	0.081	0.107	0.097	0.1	0.086	0.093	0.083	0.087	0.104	0.09	0.101	0.089	0.083	0.087	0.095	0.09	0.103	0.099	0.107	0.09	0.096	0.098	0.096	0.09	0.082	0.086	0.1	0.102	0.083	0.089	0.086	0.093	0.089	0.11	0.082	0.083	0.088	0.089
141.638	0.117	0.11	0.107	0.111	0.148	0.095	0.107	0.151	0.088	0.115	0.096	0.084	0.106	0.103	0.101	0.086	0.098	0.085	0.09	0.105	0.093	0.1	0.089	0.086	0.087	0.098	0.091	0.105	0.098	0.114	0.086	0.098	0.099	0.092	0.089	0.083	0.088	0.096	0.106	0.082	0.088	0.082	0.093	0.084	0.112	0.082	0.086	0.087	0.089
142.358	0.108	0.104	0.101	0.106	0.136	0.085	0.1	0.14	0.083	0.108	0.088	0.083	0.105	0.099	0.097	0.084	0.097	0.083	0.088	0.104	0.093	0.099	0.085	0.087	0.086	0.097	0.093	0.104	0.101	0.118	0.09	0.097	0.101	0.095	0.089	0.083	0.087	0.097	0.103	0.082	0.089	0.083	0.093	0.089	0.104	0.083	0.084	0.088	0.092
143.125	0.118	0.113	0.11	0.116	0.159	0.096	0.109	0.152	0.09	0.116	0.098	0.078	0.098	0.089	0.09	0.079	0.089	0.074	0.08	0.101	0.086	0.091	0.077	0.079	0.077	0.09	0.085	0.098	0.093	0.111	0.08	0.09	0.091	0.088	0.081	0.078	0.075	0.087	0.092	0.076	0.083	0.079	0.086	0.081	0.1	0.077	0.08	0.083	0.083
143.894	0.117	0.111	0.11	0.115	0.153	0.096	0.109	0.154	0.089	0.117	0.097	0.076	0.096	0.091	0.09	0.078	0.086	0.075	0.075	0.099	0.081	0.093	0.08	0.079	0.076	0.091	0.085	0.096	0.095	0.108	0.081	0.089	0.094	0.086	0.081	0.076	0.077	0.085	0.095	0.074	0.083	0.075	0.089	0.079	0.102	0.075	0.073	0.081	0.084
144.647	0.115	0.111	0.107	0.115	0.15	0.093	0.112	0.148	0.09	0.115	0.095	0.086	0.106	0.097	0.103	0.084	0.096	0.085	0.088	0.105	0.093	0.103	0.087	0.088	0.086	0.096	0.091	0.106	0.1	0.119	0.086	0.095	0.102	0.095	0.089	0.082	0.088	0.098	0.105	0.084	0.089	0.084	0.091	0.087	0.114	0.083	0.086	0.088	0.09
145.412	0.104	0.105	0.099	0.105	0.139	0.089	0.097	0.135	0.083	0.108	0.086	0.082	0.104	0.101	0.097	0.086	0.1	0.083	0.087	0.105	0.091	0.103	0.087	0.087	0.086	0.095	0.093	0.104	0.103	0.117	0.086	0.096	0.102	0.095	0.088	0.084	0.086	0.096	0.101	0.08	0.089	0.085	0.092	0.085	0.113	0.084	0.084	0.086	0.091
146.181	0.106	0.106	0.102	0.108	0.137	0.091	0.099	0.139	0.085	0.111	0.09	0.077	0.097	0.088	0.089	0.077	0.087	0.076	0.081	0.1	0.081	0.091	0.079	0.081	0.078	0.093	0.085	0.099	0.092	0.117	0.083	0.09	0.09	0.089	0.08	0.077	0.078	0.088	0.094	0.075	0.083	0.075	0.084	0.078	0.096	0.075	0.08	0.08	0.084
146.932	0.114	0.112	0.105	0.114	0.152	0.097	0.11	0.153	0.09	0.118	0.094	0.085	0.107	0.1	0.097	0.087	0.095	0.082	0.088	0.105	0.09	0.103	0.087	0.088	0.082	0.098	0.093	0.105	0.102	0.116	0.088	0.097	0.101	0.095	0.088	0.082	0.085	0.098	0.102	0.083	0.09	0.085	0.093	0.085	0.109	0.084	0.083	0.09	0.09
147.684	0.115	0.114	0.107	0.115	0.15	0.095	0.109	0.149	0.09	0.115	0.095	0.082	0.106	0.099	0.099	0.084	0.094	0.083	0.087	0.106	0.093	0.103	0.085	0.088	0.084	0.097	0.092	0.105	0.099	0.119	0.091	0.098	0.098	0.097	0.088	0.082	0.084	0.098	0.099	0.083	0.09	0.086	0.092	0.088	0.111	0.083	0.084	0.088	0.09
148.435	0.106	0.107	0.097	0.104	0.133	0.092	0.099	0.137	0.083	0.11	0.087	0.083	0.104	0.099	0.099	0.085	0.098	0.08	0.089	0.104	0.09	0.105	0.086	0.088	0.086	0.095	0.093	0.106	0.098	0.119	0.088	0.096	0.1	0.094	0.091	0.083	0.085	0.099	0.104	0.082	0.088	0.08	0.092	0.087	0.108	0.081	0.084	0.088	0.09
149.204	0.107	0.107	0.099	0.108	0.137	0.09	0.094	0.138	0.083	0.107	0.089	0.083	0.106	0.1	0.098	0.085	0.094	0.084	0.089	0.105	0.094	0.105	0.092	0.088	0.086	0.098	0.093	0.104	0.103	0.119	0.09	0.101	0.103	0.096	0.089	0.083	0.086	0.099	0.102	0.085	0.089	0.085	0.094	0.089	0.115	0.083	0.086	0.089	0.092
149.952	0.118	0.111	0.103	0.117	0.153	0.096	0.108	0.15	0.09	0.118	0.097	0.084	0.104	0.101	0.101	0.088	0.098	0.08	0.09	0.105	0.09	0.1	0.087	0.086	0.086	0.095	0.094	0.104	0.099	0.114	0.089	0.096	0.102	0.094	0.09	0.085	0.086	0.096	0.099	0.083	0.089	0.083	0.09	0.087	0.118	0.086	0.084	0.088	0.091
150.704	0.106	0.107	0.098	0.105	0.14	0.092	0.099	0.136	0.085	0.11	0.091	0.083	0.103	0.101	0.099	0.084	0.097	0.085	0.089	0.104	0.091	0.103	0.086	0.088	0.086	0.094	0.094	0.103	0.1	0.111	0.091	0.096	0.099	0.097	0.09	0.085	0.087	0.099	0.1	0.08	0.088	0.083	0.092	0.088	0.118	0.084	0.081	0.088	0.09
151.471	0.107	0.104	0.098	0.106	0.14	0.091	0.1	0.143	0.084	0.111	0.088	0.085	0.105	0.101	0.101	0.086	0.097	0.087	0.09	0.104	0.09	0.103	0.087	0.088	0.086	0.097	0.095	0.106	0.103	0.111	0.094	0.098	0.102	0.096	0.091	0.083	0.09	0.101	0.104	0.082	0.088	0.083	0.094	0.088	0.11	0.082	0.085	0.088	0.091
152.289	0.116	0.109	0.108	0.119	0.149	0.096	0.109	0.151	0.09	0.116	0.096	0.085	0.107	0.097	0.097	0.086	0.097	0.087	0.088	0.104	0.094	0.1	0.089	0.089	0.088	0.096	0.095	0.104	0.097	0.11	0.091	0.096	0.102	0.095	0.091	0.084	0.089	0.101	0.106	0.083	0.09	0.082	0.091	0.087	0.111	0.084	0.087	0.089	0.09
153.041	0.114	0.112	0.105	0.116	0.149	0.095	0.109	0.148	0.089	0.117	0.097	0.081	0.104	0.096	0.1	0.086	0.094	0.087	0.085	0.104	0.091	0.104	0.089	0.089	0.088	0.098	0.093	0.105	0.102	0.11	0.089	0.097	0.1	0.095	0.092	0.083	0.09	0.1	0.103	0.087	0.088	0.085	0.093	0.086	0.117	0.081	0.085	0.09	0.089
153.807	0.105	0.104	0.099	0.106	0.136	0.091	0.098	0.137	0.084	0.11	0.09	0.076	0.097	0.088	0.089	0.079	0.086	0.073	0.079	0.1	0.083	0.093	0.075	0.08	0.078	0.092	0.086	0.097	0.094	0.107	0.085	0.088	0.093	0.089	0.082	0.077	0.078	0.087	0.096	0.075	0.083	0.076	0.087	0.08	0.101	0.076	0.075	0.082	0.086
154.559	0.105	0.103	0.098	0.106	0.141	0.091	0.1	0.138	0.084	0.111	0.09	0.083	0.103	0.098	0.1	0.085	0.097	0.081	0.088	0.104	0.092	0.103	0.086	0.086	0.087	0.095	0.093	0.103	0.104	0.117	0.089	0.099	0.099	0.094	0.087	0.084	0.086	0.099	0.104	0.084	0.087	0.086	0.093	0.088	0.109	0.082	0.086	0.088	0.089
155.327	0.107	0.105	0.098	0.108	0.136	0.09	0.099	0.139	0.083	0.109	0.089	0.084	0.109	0.1	0.099	0.087	0.096	0.085	0.089	0.104	0.089	0.1	0.087	0.086	0.083	0.095	0.095	0.104	0.101	0.121	0.091	0.097	0.102	0.096	0.09	0.084	0.089	0.101	0.107	0.083	0.09	0.085	0.09	0.088	0.109	0.084	0.083	0.087	0.089
156.078	0.106	0.105	0.097	0.104	0.144	0.09	0.102	0.138	0.083	0.109	0.09	0.082	0.106	0.1	0.097	0.087	0.095	0.086	0.088	0.103	0.095	0.103	0.087	0.089	0.085	0.097	0.096	0.105	0.104	0.115	0.09	0.099	0.099	0.097	0.091	0.082	0.088	0.1	0.102	0.085	0.086	0.081	0.093	0.087	0.109	0.083	0.083	0.09	0.09
156.895	0.105	0.104	0.098	0.106	0.139	0.09	0.1	0.14	0.084	0.109	0.089	0.083	0.105	0.098	0.099	0.088	0.101	0.079	0.092	0.102	0.09	0.105	0.086	0.085	0.087	0.095	0.094	0.104	0.102	0.12	0.088	0.099	0.1	0.096	0.089	0.081	0.089	0.1	0.105	0.084	0.09	0.078	0.094	0.087	0.109	0.081	0.083	0.087	0.09
157.646	0.107	0.106	0.098	0.106	0.14	0.091	0.099	0.136	0.082	0.109	0.09	0.084	0.106	0.098	0.097	0.086	0.096	0.087	0.088	0.103	0.09	0.102	0.089	0.086	0.087	0.098	0.094	0.105	0.101	0.12	0.09	0.097	0.102	0.096	0.089	0.083	0.086	0.101	0.103	0.083	0.089	0.082	0.091	0.088	0.103	0.081	0.083	0.088	0.092
158.541	0.109	0.104	0.096	0.105	0.136	0.09	0.101	0.135	0.085	0.11	0.09	0.083	0.103	0.101	0.1	0.087	0.097	0.086	0.09	0.103	0.093	0.102	0.087	0.087	0.086	0.096	0.096	0.107	0.1	0.114	0.089	0.097	0.098	0.093	0.089	0.085	0.085	0.097	0.102	0.084	0.091	0.084	0.093	0.088	0.108	0.083	0.083	0.089	0.091
159.341	0.106	0.106	0.098	0.105	0.142	0.092	0.098	0.14	0.084	0.111	0.091	0.086	0.108	0.099	0.099	0.088	0.096	0.082	0.087	0.101	0.091	0.102	0.082	0.083	0.083	0.097	0.092	0.104	0.103	0.119	0.089	0.095	0.099	0.096	0.091	0.084	0.091	0.102	0.103	0.085	0.092	0.086	0.093	0.088	0.109	0.084	0.086	0.091	0.09
160.14	0.115	0.111	0.107	0.116	0.153	0.098	0.109	0.148	0.089	0.116	0.097	0.085	0.104	0.098	0.097	0.088	0.099	0.083	0.09	0.105	0.095	0.106	0.09	0.085	0.086	0.097	0.097	0.104	0.101	0.121	0.09	0.097	0.1	0.096	0.089	0.084	0.086	0.103	0.104	0.082	0.088	0.085	0.094	0.086	0.112	0.082	0.082	0.09	0.09
160.893	0.111	0.105	0.1	0.107	0.144	0.089	0.099	0.139	0.086	0.11	0.091	0.084	0.106	0.099	0.102	0.089	0.1	0.089	0.09	0.103	0.094	0.102	0.086	0.087	0.085	0.099	0.098	0.107	0.105	0.116	0.089	0.097	0.101	0.097	0.089	0.082	0.084	0.102	0.101	0.085	0.09	0.085	0.095	0.087	0.112	0.084	0.084	0.089	0.09
161.643	0.106	0.107	0.098	0.106	0.14	0.087	0.102	0.138	0.085	0.109	0.092	0.087	0.104	0.097	0.1	0.089	0.1	0.088	0.089	0.103	0.092	0.102	0.09	0.085	0.087	0.097	0.096	0.105	0.102	0.114	0.089	0.096	0.098	0.096	0.091	0.083	0.09	0.101	0.104	0.084	0.089	0.081	0.091	0.084	0.108	0.081	0.084	0.089	0.092
162.463	0.107	0.105	0.098	0.107	0.143	0.093	0.104	0.136	0.084	0.11	0.09	0.084	0.104	0.099	0.103	0.087	0.096	0.089	0.089	0.102	0.093	0.102	0.092	0.086	0.083	0.097	0.096	0.105	0.099	0.118	0.09	0.098	0.102	0.097	0.09	0.082	0.086	0.102	0.106	0.084	0.09	0.083	0.091	0.088	0.108	0.081	0.086	0.089	0.093
163.194	0.106	0.106	0.098	0.106	0.14	0.09	0.099	0.133	0.084	0.109	0.087	0.081	0.106	0.102	0.101	0.088	0.098	0.089	0.089	0.104	0.096	0.102	0.086	0.088	0.086	0.095	0.096	0.105	0.1	0.117	0.092	0.097	0.096	0.095	0.089	0.083	0.088	0.101	0.104	0.085	0.089	0.083	0.094	0.087	0.114	0.083	0.084	0.089	0.091
163.96	0.108	0.107	0.097	0.105	0.14	0.092	0.101	0.139	0.082	0.11	0.089	0.083	0.107	0.099	0.101	0.089	0.098	0.088	0.091	0.103	0.094	0.102	0.085	0.087	0.084	0.098	0.095	0.107	0.101	0.12	0.092	0.097	0.1	0.094	0.09	0.085	0.089	0.101	0.108	0.085	0.088	0.082	0.093	0.087	0.107	0.082	0.08	0.089	0.092
164.702	0.105	0.102	0.097	0.109	0.142	0.09	0.104	0.135	0.084	0.109	0.09	0.084	0.107	0.099	0.102	0.085	0.097	0.083	0.092	0.103	0.095	0.106	0.086	0.086	0.087	0.097	0.096	0.105	0.102	0.12	0.089	0.099	0.101	0.096	0.089	0.082	0.089	0.1	0.102	0.086	0.09	0.083	0.092	0.087	0.109	0.083	0.084	0.088	0.091
165.431	0.117	0.114	0.106	0.119	0.154	0.099	0.11	0.15	0.09	0.12	0.094	0.084	0.104	0.1	0.098	0.087	0.102	0.084	0.093	0.104	0.096	0.106	0.086	0.087	0.087	0.099	0.098	0.105	0.101	0.122	0.091	0.097	0.099	0.096	0.093	0.081	0.088	0.1	0.102	0.088	0.089	0.082	0.091	0.087	0.109	0.083	0.086	0.089	0.091
166.168	0.115	0.115	0.106	0.117	0.154	0.1	0.112	0.152	0.09	0.119	0.099	0.083	0.106	0.098	0.102	0.088	0.098	0.084	0.088	0.103	0.093	0.104	0.089	0.086	0.083	0.097	0.096	0.103	0.099	0.122	0.09	0.096	0.099	0.096	0.09	0.084	0.091	0.102	0.107	0.085	0.091	0.085	0.092	0.088	0.112	0.084	0.085	0.089	0.09
166.903	0.117	0.114	0.106	0.119	0.155	0.098	0.112	0.153	0.09	0.117	0.096	0.082	0.106	0.101	0.096	0.084	0.096	0.081	0.091	0.102	0.093	0.102	0.089	0.086	0.084	0.096	0.095	0.105	0.1	0.119	0.09	0.097	0.099	0.096	0.09	0.083	0.085	0.1	0.103	0.089	0.089	0.081	0.091	0.087	0.112	0.084	0.087	0.088	0.089
167.638	0.118	0.115	0.108	0.115	0.153	0.097	0.112	0.151	0.09	0.121	0.099	0.076	0.097	0.088	0.093	0.079	0.088	0.072	0.078	0.099	0.082	0.093	0.072	0.081	0.076	0.092	0.088	0.099	0.094	0.113	0.081	0.091	0.09	0.087	0.08	0.077	0.078	0.089	0.095	0.078	0.081	0.074	0.085	0.08	0.095	0.075	0.078	0.081	0.081
168.389	0.105	0.105	0.1	0.108	0.139	0.088	0.102	0.136	0.084	0.109	0.092	0.084	0.106	0.099	0.097	0.088	0.095	0.084	0.09	0.104	0.092	0.104	0.088	0.086	0.086	0.095	0.095	0.105	0.103	0.119	0.088	0.097	0.101	0.096	0.092	0.084	0.086	0.102	0.103	0.088	0.085	0.083	0.092	0.09	0.111	0.082	0.084	0.088	0.092
169.132	0.105	0.106	0.097	0.104	0.142	0.092	0.103	0.144	0.086	0.114	0.091	0.081	0.099	0.089	0.092	0.079	0.087	0.075	0.08	0.098	0.078	0.095	0.077	0.078	0.077	0.092	0.086	0.097	0.093	0.113	0.082	0.09	0.09	0.089	0.08	0.076	0.077	0.089	0.096	0.078	0.082	0.077	0.087	0.076	0.095	0.078	0.078	0.082	0.082
169.878	0.106	0.106	0.099	0.107	0.137	0.09	0.1	0.138	0.085	0.114	0.092	0.084	0.106	0.098	0.1	0.088	0.097	0.083	0.087	0.103	0.094	0.105	0.086	0.087	0.088	0.095	0.093	0.105	0.104	0.12	0.09	0.098	0.098	0.096	0.091	0.084	0.085	0.103	0.106	0.089	0.089	0.084	0.093	0.089	0.111	0.083	0.087	0.091	0.091
170.635	0.116	0.115	0.109	0.116	0.155	0.099	0.109	0.151	0.089	0.121	0.097	0.077	0.099	0.089	0.089	0.079	0.089	0.074	0.08	0.098	0.083	0.094	0.073	0.079	0.075	0.092	0.087	0.099	0.094	0.109	0.083	0.089	0.093	0.089	0.079	0.079	0.075	0.093	0.09	0.076	0.082	0.074	0.088	0.077	0.099	0.076	0.079	0.083	0.084
171.365	0.118	0.112	0.108	0.119	0.154	0.097	0.112	0.149	0.092	0.121	0.101	0.084	0.109	0.098	0.102	0.087	0.099	0.087	0.09	0.102	0.092	0.102	0.084	0.086	0.085	0.096	0.094	0.103	0.101	0.123	0.092	0.097	0.102	0.094	0.089	0.081	0.09	0.099	0.106	0.087	0.089	0.084	0.092	0.087	0.115	0.084	0.086	0.092	0.091
172.131	0.106	0.106	0.101	0.106	0.143	0.09	0.103	0.136	0.084	0.114	0.09	0.075	0.102	0.091	0.092	0.08	0.086	0.072	0.078	0.099	0.081	0.092	0.077	0.079	0.077	0.09	0.086	0.1	0.093	0.108	0.082	0.089	0.094	0.089	0.081	0.074	0.077	0.091	0.095	0.077	0.08	0.079	0.087	0.083	0.104	0.078	0.081	0.084	0.087
172.868	0.109	0.105	0.099	0.108	0.144	0.092	0.101	0.142	0.083	0.114	0.089	0.086	0.107	0.103	0.1	0.086	0.097	0.089	0.091	0.103	0.094	0.105	0.092	0.085	0.084	0.096	0.093	0.103	0.101	0.118	0.09	0.097	0.101	0.093	0.088	0.082	0.089	0.105	0.103	0.087	0.092	0.081	0.091	0.086	0.109	0.083	0.089	0.09	0.089
173.636	0.109	0.106	0.097	0.106	0.14	0.091	0.104	0.138	0.086	0.111	0.089	0.087	0.107	0.1	0.097	0.084	0.099	0.084	0.09	0.103	0.092	0.101	0.088	0.087	0.085	0.096	0.094	0.104	0.1	0.117	0.089	0.098	0.102	0.093	0.09	0.084	0.088	0.105	0.105	0.087	0.09	0.083	0.091	0.086	0.109	0.086	0.087	0.091	0.09
174.386	0.107	0.107	0.099	0.105	0.144	0.092	0.102	0.138	0.086	0.112	0.089	0.082	0.104	0.099	0.098	0.087	0.097	0.088	0.087	0.102	0.094	0.102	0.087	0.085	0.084	0.097	0.093	0.105	0.104	0.119	0.092	0.097	0.101	0.095	0.092	0.084	0.087	0.101	0.105	0.089	0.09	0.086	0.093	0.088	0.112	0.086	0.089	0.093	0.089
175.122	0.118	0.11	0.107	0.115	0.151	0.097	0.112	0.151	0.091	0.122	0.097	0.085	0.107	0.1	0.1	0.087	0.094	0.082	0.09	0.102	0.093	0.102	0.089	0.085	0.086	0.097	0.094	0.106	0.102	0.119	0.09	0.097	0.101	0.097	0.092	0.083	0.091	0.105	0.105	0.086	0.09	0.083	0.092	0.087	0.105	0.083	0.085	0.089	0.09
175.889	0.107	0.106	0.1	0.108	0.139	0.089	0.1	0.135	0.082	0.11	0.089	0.085	0.107	0.101	0.099	0.087	0.097	0.08	0.087	0.103	0.092	0.102	0.087	0.088	0.085	0.096	0.098	0.107	0.098	0.117	0.089	0.097	0.101	0.094	0.088	0.083	0.089	0.102	0.106	0.088	0.09	0.085	0.094	0.088	0.118	0.082	0.086	0.09	0.093
176.607	0.112	0.103	0.103	0.109	0.141	0.089	0.1	0.14	0.083	0.113	0.087	0.085	0.109	0.098	0.101	0.085	0.096	0.083	0.089	0.103	0.092	0.101	0.084	0.088	0.084	0.094	0.093	0.105	0.103	0.118	0.089	0.095	0.099	0.095	0.092	0.083	0.089	0.105	0.105	0.085	0.09	0.084	0.092	0.088	0.108	0.086	0.089	0.09	0.09
177.393	0.109	0.107	0.099	0.11	0.142	0.093	0.102	0.143	0.087	0.115	0.091	0.077	0.099	0.089	0.086	0.077	0.087	0.07	0.079	0.096	0.081	0.092	0.076	0.081	0.077	0.09	0.085	0.098	0.093	0.112	0.082	0.09	0.093	0.086	0.08	0.077	0.079	0.09	0.096	0.075	0.085	0.076	0.085	0.078	0.097	0.078	0.081	0.083	0.083
178.128	0.108	0.104	0.097	0.106	0.138	0.092	0.102	0.14	0.084	0.116	0.091	0.085	0.108	0.103	0.1	0.088	0.098	0.085	0.088	0.103	0.095	0.101	0.088	0.088	0.083	0.097	0.094	0.106	0.098	0.113	0.089	0.097	0.102	0.096	0.091	0.085	0.087	0.105	0.103	0.086	0.09	0.085	0.092	0.09	0.115	0.084	0.089	0.089	0.09
178.893	0.108	0.108	0.097	0.104	0.137	0.093	0.099	0.139	0.086	0.112	0.09	0.085	0.111	0.099	0.1	0.085	0.098	0.087	0.087	0.104	0.094	0.102	0.09	0.085	0.085	0.097	0.093	0.105	0.101	0.12	0.09	0.098	0.102	0.095	0.093	0.083	0.09	0.102	0.105	0.088	0.09	0.086	0.093	0.087	0.11	0.084	0.088	0.092	0.089
179.648	0.116	0.112	0.105	0.115	0.148	0.096	0.11	0.146	0.091	0.121	0.098	0.082	0.109	0.1	0.1	0.086	0.099	0.082	0.094	0.105	0.095	0.104	0.086	0.085	0.085	0.095	0.094	0.104	0.099	0.12	0.091	0.094	0.101	0.095	0.091	0.084	0.088	0.103	0.103	0.088	0.092	0.083	0.094	0.089	0.108	0.084	0.091	0.09	0.089
180.428	0.107	0.105	0.1	0.107	0.138	0.091	0.102	0.137	0.086	0.114	0.09	0.085	0.114	0.098	0.098	0.086	0.096	0.083	0.088	0.101	0.091	0.099	0.083	0.085	0.084	0.095	0.093	0.102	0.1	0.117	0.088	0.095	0.1	0.094	0.089	0.084	0.085	0.099	0.1	0.086	0.087	0.083	0.09	0.086	0.111	0.086	0.088	0.088	0.088
181.182	0.109	0.105	0.094	0.103	0.135	0.092	0.101	0.144	0.085	0.116	0.093	0.083	0.113	0.098	0.099	0.085	0.098	0.083	0.086	0.102	0.094	0.104	0.084	0.088	0.087	0.094	0.093	0.104	0.102	0.115	0.087	0.094	0.095	0.095	0.092	0.083	0.09	0.105	0.107	0.085	0.089	0.086	0.091	0.085	0.108	0.084	0.091	0.089	0.088
181.948	0.109	0.107	0.099	0.107	0.144	0.092	0.101	0.141	0.087	0.115	0.091	0.082	0.115	0.096	0.1	0.087	0.098	0.085	0.087	0.1	0.096	0.101	0.087	0.085	0.084	0.094	0.094	0.104	0.1	0.116	0.089	0.094	0.101	0.095	0.092	0.084	0.088	0.102	0.103	0.091	0.089	0.086	0.093	0.085	0.103	0.084	0.089	0.087	0.089
182.719	0.12	0.114	0.108	0.117	0.158	0.101	0.112	0.149	0.094	0.126	0.099	0.086	0.114	0.102	0.102	0.085	0.097	0.08	0.088	0.102	0.092	0.105	0.083	0.083	0.084	0.096	0.092	0.104	0.1	0.12	0.088	0.095	0.099	0.096	0.09	0.084	0.087	0.099	0.104	0.085	0.089	0.084	0.093	0.085	0.11	0.083	0.088	0.09	0.09
183.549	0.108	0.104	0.1	0.109	0.136	0.09	0.104	0.137	0.085	0.113	0.09	0.079	0.11	0.087	0.087	0.076	0.082	0.071	0.078	0.096	0.078	0.092	0.074	0.078	0.074	0.088	0.085	0.097	0.092	0.114	0.077	0.088	0.092	0.089	0.083	0.079	0.08	0.093	0.098	0.076	0.084	0.079	0.09	0.083	0.09	0.076	0.081	0.08	0.082
184.315	0.109	0.102	0.098	0.109	0.14	0.095	0.104	0.138	0.086	0.114	0.094	0.084	0.115	0.098	0.098	0.085	0.095	0.084	0.086	0.102	0.092	0.102	0.081	0.087	0.083	0.094	0.091	0.105	0.102	0.116	0.087	0.098	0.1	0.093	0.089	0.083	0.088	0.103	0.103	0.086	0.09	0.086	0.094	0.087	0.109	0.082	0.091	0.09	0.09
185.068	0.109	0.108	0.101	0.107	0.14	0.091	0.102	0.138	0.086	0.114	0.089	0.076	0.108	0.09	0.087	0.074	0.083	0.071	0.077	0.097	0.081	0.092	0.074	0.079	0.074	0.092	0.085	0.098	0.093	0.11	0.08	0.088	0.094	0.088	0.085	0.077	0.08	0.09	0.092	0.079	0.086	0.077	0.086	0.081	0.103	0.077	0.083	0.083	0.082
185.834	0.11	0.105	0.099	0.108	0.145	0.09	0.1	0.143	0.087	0.116	0.09	0.081	0.114	0.099	0.098	0.084	0.094	0.083	0.086	0.101	0.092	0.102	0.084	0.085	0.081	0.097	0.091	0.106	0.098	0.118	0.088	0.098	0.101	0.097	0.092	0.084	0.087	0.102	0.105	0.088	0.09	0.084	0.094	0.089	0.104	0.082	0.087	0.09	0.089
186.651	0.108	0.105	0.099	0.107	0.14	0.093	0.103	0.14	0.086	0.114	0.092	0.079	0.111	0.089	0.091	0.077	0.087	0.076	0.079	0.097	0.079	0.091	0.073	0.081	0.077	0.089	0.087	0.097	0.09	0.113	0.084	0.088	0.094	0.088	0.08	0.076	0.078	0.09	0.093	0.079	0.081	0.077	0.086	0.084	0.099	0.075	0.08	0.081	0.088
187.402	0.117	0.113	0.109	0.118	0.158	0.101	0.111	0.148	0.091	0.123	0.097	0.085	0.114	0.1	0.098	0.085	0.096	0.083	0.089	0.101	0.094	0.102	0.083	0.085	0.087	0.095	0.093	0.107	0.101	0.122	0.091	0.097	0.098	0.095	0.091	0.081	0.089	0.103	0.104	0.088	0.092	0.078	0.092	0.086	0.118	0.082	0.089	0.088	0.088
188.169	0.116	0.113	0.108	0.119	0.151	0.097	0.112	0.153	0.093	0.126	0.096	0.079	0.11	0.09	0.087	0.075	0.085	0.071	0.079	0.097	0.082	0.091	0.074	0.08	0.075	0.089	0.088	0.098	0.094	0.116	0.081	0.088	0.091	0.089	0.083	0.076	0.077	0.091	0.093	0.077	0.081	0.076	0.086	0.081	0.099	0.075	0.083	0.081	0.085
188.921	0.107	0.105	0.099	0.108	0.143	0.095	0.101	0.141	0.087	0.117	0.091	0.083	0.114	0.097	0.101	0.083	0.092	0.083	0.086	0.102	0.089	0.1	0.088	0.085	0.084	0.096	0.092	0.106	0.1	0.119	0.085	0.097	0.101	0.095	0.088	0.083	0.091	0.104	0.103	0.086	0.091	0.087	0.092	0.088	0.105	0.081	0.09	0.088	0.092
189.673	0.106	0.103	0.099	0.107	0.143	0.095	0.105	0.135	0.086	0.116	0.092	0.083	0.119	0.099	0.101	0.084	0.097	0.082	0.09	0.101	0.092	0.101	0.089	0.087	0.083	0.096	0.093	0.106	0.099	0.119	0.09	0.098	0.101	0.095	0.092	0.083	0.09	0.104	0.107	0.087	0.087	0.081	0.091	0.088	0.11	0.084	0.093	0.089	0.094
190.424	0.108	0.104	0.099	0.106	0.144	0.092	0.102	0.137	0.086	0.115	0.09	0.077	0.106	0.087	0.088	0.076	0.084	0.073	0.077	0.098	0.082	0.094	0.076	0.079	0.074	0.088	0.084	0.098	0.092	0.115	0.08	0.09	0.093	0.087	0.081	0.077	0.077	0.092	0.09	0.075	0.083	0.074	0.085	0.082	0.102	0.073	0.083	0.082	0.087
191.195	0.11	0.103	0.101	0.107	0.141	0.094	0.103	0.139	0.086	0.114	0.089	0.083	0.117	0.099	0.099	0.085	0.095	0.083	0.086	0.101	0.088	0.098	0.084	0.087	0.081	0.095	0.092	0.105	0.1	0.128	0.086	0.096	0.101	0.093	0.091	0.086	0.09	0.104	0.105	0.082	0.088	0.081	0.092	0.089	0.112	0.085	0.092	0.089	0.091
191.99	0.105	0.106	0.1	0.109	0.142	0.098	0.103	0.135	0.083	0.115	0.092	0.082	0.117	0.1	0.1	0.084	0.096	0.083	0.09	0.102	0.093	0.102	0.08	0.086	0.085	0.094	0.092	0.104	0.101	0.119	0.09	0.097	0.099	0.094	0.091	0.084	0.09	0.102	0.106	0.087	0.092	0.083	0.094	0.087	0.112	0.083	0.091	0.088	0.088
192.791	0.107	0.106	0.098	0.106	0.138	0.093	0.104	0.136	0.086	0.117	0.093	0.084	0.115	0.095	0.099	0.084	0.097	0.08	0.088	0.101	0.094	0.103	0.086	0.086	0.084	0.095	0.091	0.105	0.099	0.118	0.088	0.094	0.101	0.094	0.09	0.083	0.09	0.104	0.102	0.085	0.089	0.083	0.094	0.09	0.112	0.083	0.091	0.088	0.089
193.545	0.105	0.107	0.097	0.108	0.139	0.091	0.105	0.138	0.085	0.115	0.092	0.086	0.115	0.099	0.102	0.086	0.096	0.084	0.089	0.101	0.091	0.105	0.08	0.085	0.082	0.096	0.091	0.104	0.101	0.123	0.092	0.098	0.099	0.095	0.091	0.084	0.09	0.104	0.101	0.087	0.09	0.084	0.092	0.092	0.114	0.083	0.092	0.091	0.091
194.294	0.108	0.102	0.102	0.106	0.139	0.092	0.102	0.133	0.087	0.113	0.09	0.085	0.121	0.099	0.1	0.087	0.098	0.083	0.091	0.103	0.091	0.099	0.086	0.086	0.084	0.097	0.091	0.103	0.101	0.116	0.087	0.099	0.099	0.094	0.09	0.085	0.091	0.106	0.102	0.087	0.088	0.084	0.093	0.088	0.103	0.082	0.094	0.09	0.091
195.03	0.105	0.105	0.102	0.108	0.141	0.095	0.1	0.135	0.086	0.115	0.091	0.085	0.118	0.096	0.1	0.088	0.096	0.085	0.091	0.103	0.091	0.101	0.083	0.086	0.084	0.095	0.092	0.106	0.101	0.118	0.092	0.096	0.1	0.095	0.091	0.084	0.093	0.106	0.105	0.088	0.09	0.087	0.092	0.088	0.109	0.083	0.093	0.09	0.091
195.78	0.108	0.106	0.103	0.107	0.143	0.094	0.103	0.135	0.084	0.113	0.09	0.079	0.108	0.09	0.09	0.076	0.084	0.074	0.073	0.099	0.078	0.089	0.075	0.08	0.074	0.09	0.085	0.097	0.091	0.112	0.079	0.088	0.093	0.089	0.083	0.08	0.086	0.096	0.099	0.082	0.084	0.076	0.088	0.082	0.095	0.075	0.089	0.086	0.085
196.532	0.108	0.105	0.099	0.105	0.141	0.094	0.102	0.14	0.086	0.117	0.092	0.088	0.116	0.099	0.102	0.087	0.099	0.085	0.088	0.103	0.097	0.103	0.083	0.084	0.084	0.095	0.091	0.104	0.102	0.121	0.092	0.098	0.098	0.095	0.091	0.084	0.092	0.104	0.104	0.089	0.09	0.084	0.09	0.09	0.111	0.084	0.092	0.091	0.088
197.283	0.115	0.114	0.109	0.118	0.16	0.105	0.114	0.15	0.091	0.125	0.099	0.086	0.111	0.098	0.099	0.086	0.097	0.085	0.089	0.104	0.093	0.101	0.086	0.087	0.085	0.097	0.091	0.106	0.101	0.123	0.09	0.096	0.101	0.095	0.092	0.083	0.092	0.105	0.106	0.091	0.088	0.084	0.092	0.092	0.107	0.084	0.093	0.091	0.091
198.02	0.108	0.107	0.101	0.108	0.141	0.09	0.104	0.137	0.086	0.115	0.092	0.083	0.115	0.101	0.097	0.083	0.097	0.082	0.087	0.102	0.093	0.102	0.087	0.086	0.085	0.095	0.092	0.104	0.1	0.12	0.089	0.097	0.101	0.097	0.094	0.084	0.09	0.103	0.106	0.087	0.089	0.087	0.095	0.089	0.114	0.084	0.092	0.091	0.092
198.787	0.116	0.113	0.113	0.116	0.162	0.101	0.111	0.149	0.092	0.125	0.096	0.083	0.114	0.095	0.098	0.084	0.097	0.086	0.088	0.103	0.095	0.104	0.087	0.086	0.088	0.095	0.093	0.106	0.102	0.118	0.089	0.097	0.099	0.098	0.096	0.085	0.092	0.104	0.108	0.087	0.09	0.082	0.095	0.088	0.103	0.081	0.092	0.092	0.09
199.538	0.107	0.106	0.103	0.11	0.145	0.098	0.103	0.139	0.084	0.119	0.094	0.082	0.111	0.097	0.097	0.086	0.095	0.083	0.088	0.103	0.091	0.102	0.084	0.086	0.084	0.096	0.091	0.105	0.097	0.12	0.089	0.094	0.102	0.096	0.092	0.086	0.094	0.103	0.103	0.09	0.089	0.082	0.094	0.085	0.11	0.079	0.093	0.091	0.094
200.274	0.107	0.106	0.105	0.108	0.148	0.095	0.104	0.138	0.086	0.116	0.091	0.087	0.112	0.1	0.101	0.085	0.096	0.082	0.09	0.104	0.093	0.102	0.085	0.084	0.086	0.096	0.091	0.105	0.101	0.122	0.088	0.099	0.101	0.096	0.091	0.085	0.093	0.104	0.104	0.093	0.09	0.083	0.096	0.088	0.122	0.081	0.093	0.092	0.09
201.026	0.118	0.112	0.113	0.118	0.162	0.101	0.113	0.154	0.095	0.126	0.1	0.078	0.105	0.087	0.09	0.076	0.086	0.069	0.077	0.097	0.081	0.091	0.075	0.079	0.074	0.089	0.084	0.098	0.093	0.107	0.084	0.09	0.092	0.089	0.083	0.08	0.077	0.094	0.092	0.079	0.083	0.078	0.088	0.08	0.1	0.076	0.086	0.086	0.084
201.761	0.12	0.11	0.11	0.117	0.168	0.104	0.111	0.15	0.093	0.124	0.098	0.08	0.113	0.1	0.1	0.084	0.094	0.085	0.089	0.102	0.089	0.099	0.086	0.086	0.085	0.094	0.091	0.103	0.099	0.114	0.088	0.098	0.098	0.096	0.093	0.084	0.09	0.1	0.104	0.091	0.089	0.084	0.093	0.09	0.111	0.083	0.093	0.091	0.088
202.576	0.11	0.107	0.102	0.106	0.155	0.095	0.108	0.138	0.087	0.116	0.091	0.085	0.11	0.099	0.1	0.09	0.098	0.081	0.088	0.102	0.093	0.099	0.083	0.084	0.085	0.095	0.09	0.102	0.102	0.116	0.09	0.097	0.099	0.096	0.093	0.082	0.088	0.104	0.101	0.091	0.086	0.083	0.093	0.085	0.103	0.082	0.089	0.09	0.089
203.313	0.111	0.107	0.102	0.108	0.153	0.093	0.103	0.14	0.086	0.115	0.092	0.087	0.113	0.097	0.099	0.087	0.096	0.084	0.089	0.101	0.094	0.102	0.087	0.085	0.084	0.094	0.093	0.102	0.102	0.12	0.091	0.097	0.101	0.096	0.093	0.085	0.095	0.107	0.105	0.091	0.09	0.086	0.093	0.091	0.107	0.081	0.093	0.092	0.092
204.175	0.113	0.107	0.102	0.11	0.154	0.096	0.107	0.135	0.087	0.114	0.093	0.087	0.112	0.098	0.098	0.082	0.098	0.083	0.091	0.101	0.09	0.102	0.087	0.086	0.084	0.094	0.094	0.102	0.103	0.124	0.089	0.097	0.101	0.096	0.093	0.086	0.095	0.107	0.107	0.091	0.091	0.084	0.092	0.089	0.114	0.082	0.095	0.09	0.095
204.926	0.115	0.106	0.103	0.108	0.162	0.096	0.106	0.142	0.087	0.118	0.09	0.079	0.108	0.087	0.089	0.078	0.086	0.076	0.077	0.098	0.082	0.092	0.071	0.081	0.078	0.09	0.086	0.098	0.096	0.11	0.082	0.091	0.091	0.088	0.081	0.078	0.083	0.094	0.091	0.084	0.081	0.077	0.087	0.078	0.104	0.076	0.087	0.083	0.084
205.665	0.112	0.108	0.105	0.108	0.167	0.094	0.108	0.139	0.087	0.115	0.089	0.083	0.114	0.1	0.097	0.085	0.095	0.081	0.088	0.102	0.093	0.101	0.081	0.083	0.079	0.095	0.09	0.105	0.098	0.114	0.089	0.096	0.099	0.097	0.094	0.086	0.097	0.109	0.105	0.093	0.091	0.087	0.092	0.09	0.108	0.085	0.092	0.092	0.094
206.413	0.122	0.114	0.112	0.12	0.192	0.101	0.119	0.149	0.091	0.124	0.101	0.083	0.113	0.099	0.1	0.088	0.097	0.086	0.089	0.102	0.096	0.104	0.086	0.085	0.085	0.095	0.092	0.105	0.102	0.116	0.087	0.097	0.102	0.093	0.093	0.086	0.093	0.103	0.109	0.091	0.092	0.085	0.094	0.088	0.11	0.083	0.094	0.092	0.094
207.133	0.117	0.109	0.103	0.105	0.175	0.093	0.106	0.133	0.085	0.116	0.091	0.084	0.112	0.097	0.1	0.085	0.096	0.082	0.088	0.102	0.093	0.103	0.085	0.086	0.086	0.095	0.093	0.106	0.099	0.118	0.089	0.094	0.1	0.094	0.093	0.086	0.093	0.105	0.105	0.093	0.089	0.088	0.092	0.088	0.113	0.082	0.095	0.092	0.093
207.873	0.119	0.109	0.102	0.107	0.184	0.094	0.104	0.141	0.084	0.117	0.091	0.085	0.111	0.102	0.097	0.086	0.099	0.086	0.091	0.101	0.093	0.102	0.085	0.085	0.084	0.096	0.094	0.105	0.1	0.118	0.092	0.097	0.099	0.096	0.093	0.085	0.091	0.106	0.103	0.093	0.088	0.085	0.094	0.089	0.108	0.081	0.091	0.093	0.091
208.637	0.118	0.112	0.104	0.107	0.188	0.093	0.106	0.138	0.085	0.117	0.091	0.084	0.11	0.099	0.096	0.086	0.098	0.083	0.089	0.101	0.091	0.1	0.086	0.086	0.083	0.097	0.09	0.106	0.103	0.125	0.091	0.096	0.099	0.096	0.094	0.086	0.094	0.107	0.107	0.093	0.088	0.087	0.094	0.088	0.115	0.084	0.096	0.092	0.091
209.372	0.121	0.111	0.105	0.112	0.202	0.093	0.108	0.136	0.087	0.119	0.094	0.086	0.111	0.099	0.101	0.086	0.096	0.087	0.088	0.101	0.092	0.102	0.084	0.088	0.085	0.094	0.095	0.105	0.103	0.118	0.09	0.099	0.101	0.097	0.095	0.084	0.097	0.107	0.106	0.089	0.091	0.086	0.092	0.09	0.113	0.084	0.091	0.089	0.091
210.14	0.12	0.111	0.102	0.106	0.201	0.093	0.109	0.137	0.086	0.121	0.09	0.083	0.109	0.098	0.099	0.085	0.097	0.083	0.087	0.102	0.09	0.101	0.088	0.087	0.085	0.095	0.094	0.105	0.101	0.125	0.092	0.098	0.099	0.096	0.093	0.085	0.091	0.105	0.106	0.093	0.088	0.084	0.092	0.086	0.111	0.086	0.093	0.09	0.091
210.922	0.126	0.111	0.105	0.11	0.212	0.094	0.109	0.14	0.089	0.121	0.093	0.083	0.11	0.099	0.099	0.084	0.097	0.084	0.085	0.103	0.092	0.1	0.085	0.087	0.085	0.094	0.094	0.105	0.1	0.121	0.088	0.094	0.098	0.096	0.091	0.083	0.096	0.105	0.107	0.091	0.088	0.086	0.093	0.088	0.102	0.083	0.093	0.092	0.091
211.658	0.126	0.109	0.105	0.108	0.213	0.094	0.108	0.138	0.085	0.121	0.09	0.084	0.114	0.099	0.098	0.085	0.094	0.081	0.087	0.102	0.09	0.104	0.083	0.087	0.085	0.096	0.091	0.105	0.097	0.12	0.09	0.097	0.099	0.096	0.091	0.086	0.091	0.103	0.103	0.091	0.085	0.085	0.092	0.089	0.117	0.081	0.097	0.091	0.092
212.41	0.126	0.111	0.103	0.108	0.22	0.094	0.11	0.139	0.087	0.123	0.095	0.083	0.112	0.101	0.099	0.087	0.097	0.088	0.088	0.102	0.094	0.1	0.085	0.084	0.086	0.096	0.09	0.104	0.099	0.125	0.091	0.097	0.099	0.095	0.09	0.086	0.091	0.104	0.099	0.092	0.089	0.085	0.095	0.09	0.105	0.081	0.092	0.09	0.09
213.13	0.13	0.112	0.101	0.106	0.226	0.094	0.11	0.141	0.085	0.123	0.088	0.085	0.11	0.099	0.101	0.086	0.095	0.086	0.09	0.102	0.092	0.101	0.085	0.087	0.086	0.095	0.092	0.103	0.1	0.127	0.09	0.097	0.099	0.096	0.092	0.086	0.092	0.104	0.104	0.094	0.091	0.087	0.094	0.087	0.107	0.083	0.092	0.091	0.091
213.895	0.136	0.111	0.103	0.11	0.232	0.098	0.116	0.139	0.088	0.125	0.094	0.081	0.11	0.1	0.098	0.086	0.097	0.087	0.087	0.101	0.094	0.102	0.085	0.086	0.084	0.096	0.094	0.106	0.101	0.122	0.09	0.096	0.1	0.095	0.095	0.085	0.093	0.107	0.109	0.092	0.09	0.085	0.093	0.091	0.111	0.086	0.092	0.089	0.092
214.68	0.137	0.108	0.104	0.11	0.246	0.096	0.117	0.141	0.088	0.124	0.094	0.079	0.101	0.088	0.088	0.075	0.087	0.072	0.079	0.097	0.083	0.09	0.068	0.081	0.074	0.09	0.084	0.097	0.093	0.117	0.079	0.088	0.092	0.088	0.081	0.079	0.081	0.093	0.096	0.081	0.084	0.077	0.085	0.078	0.083	0.074	0.085	0.084	0.083
215.399	0.141	0.113	0.105	0.113	0.255	0.096	0.118	0.141	0.088	0.129	0.095	0.082	0.11	0.098	0.098	0.085	0.094	0.082	0.089	0.101	0.093	0.101	0.089	0.086	0.088	0.098	0.093	0.104	0.101	0.124	0.093	0.096	0.102	0.096	0.093	0.083	0.094	0.107	0.105	0.088	0.091	0.085	0.094	0.087	0.117	0.082	0.095	0.089	0.092
216.135	0.143	0.112	0.105	0.117	0.26	0.093	0.12	0.143	0.087	0.125	0.092	0.077	0.101	0.089	0.087	0.077	0.084	0.07	0.077	0.098	0.082	0.096	0.073	0.082	0.079	0.089	0.086	0.098	0.093	0.12	0.078	0.087	0.092	0.089	0.081	0.08	0.083	0.093	0.09	0.08	0.085	0.074	0.088	0.081	0.098	0.077	0.086	0.083	0.084
216.887	0.148	0.111	0.106	0.116	0.273	0.096	0.125	0.142	0.089	0.13	0.091	0.083	0.111	0.099	0.099	0.086	0.097	0.086	0.09	0.101	0.094	0.102	0.086	0.088	0.085	0.096	0.094	0.104	0.099	0.129	0.089	0.097	0.097	0.096	0.094	0.085	0.093	0.106	0.106	0.093	0.089	0.086	0.092	0.09	0.113	0.086	0.098	0.091	0.091
217.656	0.154	0.112	0.105	0.115	0.266	0.097	0.127	0.142	0.085	0.13	0.094	0.085	0.11	0.1	0.101	0.088	0.098	0.086	0.088	0.103	0.094	0.104	0.088	0.087	0.087	0.096	0.093	0.105	0.1	0.128	0.092	0.096	0.098	0.096	0.09	0.084	0.092	0.102	0.104	0.091	0.089	0.087	0.093	0.088	0.114	0.085	0.101	0.091	0.091
218.422	0.163	0.109	0.107	0.115	0.28	0.09	0.128	0.145	0.085	0.129	0.094	0.085	0.108	0.096	0.099	0.086	0.096	0.077	0.088	0.102	0.093	0.103	0.086	0.087	0.082	0.095	0.092	0.102	0.1	0.127	0.087	0.096	0.099	0.096	0.092	0.084	0.092	0.105	0.104	0.091	0.09	0.088	0.092	0.089	0.103	0.083	0.1	0.089	0.094
219.189	0.163	0.111	0.108	0.117	0.287	0.095	0.13	0.147	0.087	0.132	0.096	0.083	0.114	0.099	0.099	0.085	0.098	0.085	0.09	0.102	0.089	0.1	0.088	0.088	0.085	0.094	0.095	0.102	0.101	0.132	0.086	0.095	0.099	0.096	0.091	0.085	0.09	0.104	0.099	0.092	0.092	0.085	0.094	0.089	0.11	0.084	0.096	0.093	0.09
219.986	0.17	0.112	0.105	0.119	0.294	0.098	0.134	0.148	0.087	0.135	0.097	0.085	0.11	0.1	0.096	0.087	0.095	0.084	0.089	0.102	0.089	0.099	0.084	0.088	0.084	0.096	0.093	0.102	0.102	0.128	0.091	0.095	0.098	0.096	0.089	0.087	0.091	0.102	0.105	0.092	0.091	0.082	0.092	0.086	0.11	0.085	0.1	0.09	0.088
220.788	0.18	0.11	0.104	0.12	0.314	0.097	0.138	0.148	0.087	0.137	0.095	0.077	0.098	0.089	0.089	0.077	0.086	0.073	0.078	0.096	0.081	0.092	0.072	0.08	0.077	0.09	0.082	0.098	0.094	0.118	0.08	0.089	0.092	0.087	0.081	0.079	0.082	0.092	0.092	0.079	0.083	0.075	0.086	0.078	0.102	0.077	0.092	0.083	0.083
221.54	0.182	0.111	0.109	0.118	0.301	0.096	0.144	0.144	0.087	0.135	0.095	0.083	0.11	0.097	0.099	0.084	0.095	0.087	0.088	0.103	0.094	0.101	0.085	0.087	0.087	0.096	0.092	0.104	0.1	0.129	0.091	0.098	0.102	0.097	0.091	0.088	0.091	0.104	0.102	0.09	0.09	0.088	0.094	0.089	0.113	0.088	0.099	0.093	0.09
222.289	0.194	0.113	0.108	0.117	0.299	0.101	0.146	0.15	0.088	0.137	0.096	0.084	0.11	0.099	0.096	0.084	0.095	0.082	0.086	0.101	0.093	0.098	0.087	0.087	0.084	0.094	0.093	0.103	0.104	0.13	0.092	0.097	0.1	0.097	0.089	0.085	0.089	0.099	0.102	0.093	0.09	0.09	0.094	0.089	0.109	0.086	0.095	0.091	0.092
223.042	0.205	0.115	0.11	0.12	0.325	0.101	0.157	0.149	0.088	0.137	0.093	0.082	0.109	0.1	0.095	0.087	0.095	0.084	0.087	0.104	0.093	0.102	0.086	0.088	0.084	0.095	0.093	0.105	0.102	0.136	0.089	0.095	0.1	0.097	0.094	0.085	0.093	0.107	0.101	0.088	0.092	0.087	0.094	0.09	0.115	0.084	0.102	0.091	0.091
223.793	0.212	0.115	0.108	0.116	0.322	0.102	0.162	0.153	0.089	0.138	0.096	0.084	0.109	0.101	0.099	0.086	0.095	0.082	0.087	0.102	0.094	0.105	0.084	0.088	0.084	0.095	0.091	0.103	0.103	0.132	0.092	0.095	0.1	0.096	0.09	0.084	0.089	0.105	0.102	0.09	0.091	0.09	0.095	0.092	0.12	0.087	0.104	0.091	0.094
224.55	0.221	0.111	0.109	0.122	0.319	0.099	0.167	0.159	0.089	0.139	0.098	0.085	0.11	0.101	0.101	0.085	0.095	0.084	0.084	0.102	0.093	0.098	0.086	0.087	0.086	0.093	0.09	0.105	0.101	0.13	0.091	0.095	0.1	0.094	0.09	0.086	0.094	0.103	0.102	0.091	0.088	0.086	0.092	0.09	0.109	0.085	0.1	0.091	0.091
225.297	0.24	0.114	0.11	0.127	0.342	0.103	0.173	0.163	0.09	0.146	0.098	0.084	0.113	0.097	0.098	0.084	0.094	0.08	0.086	0.102	0.096	0.098	0.09	0.088	0.085	0.096	0.093	0.105	0.104	0.132	0.091	0.098	0.1	0.097	0.093	0.086	0.094	0.105	0.101	0.091	0.092	0.089	0.094	0.089	0.113	0.086	0.105	0.094	0.092
226.049	0.247	0.112	0.11	0.122	0.337	0.097	0.182	0.159	0.091	0.142	0.097	0.085	0.111	0.1	0.096	0.084	0.094	0.082	0.087	0.103	0.094	0.101	0.088	0.088	0.084	0.095	0.094	0.103	0.102	0.13	0.09	0.095	0.102	0.096	0.092	0.085	0.091	0.101	0.101	0.092	0.091	0.085	0.095	0.089	0.116	0.084	0.104	0.093	0.092
226.784	0.252	0.111	0.108	0.123	0.34	0.102	0.184	0.159	0.088	0.146	0.098	0.084	0.11	0.096	0.101	0.083	0.096	0.085	0.087	0.103	0.094	0.097	0.088	0.087	0.083	0.095	0.093	0.104	0.105	0.127	0.09	0.098	0.103	0.095	0.092	0.085	0.092	0.102	0.104	0.092	0.094	0.087	0.091	0.089	0.107	0.087	0.113	0.094	0.087
227.536	0.27	0.115	0.109	0.123	0.359	0.101	0.196	0.167	0.088	0.148	0.103	0.083	0.108	0.098	0.097	0.086	0.094	0.081	0.086	0.101	0.099	0.101	0.087	0.086	0.087	0.095	0.091	0.105	0.101	0.128	0.092	0.095	0.101	0.094	0.087	0.089	0.091	0.102	0.101	0.092	0.093	0.089	0.094	0.088	0.101	0.086	0.116	0.095	0.086
228.288	0.285	0.116	0.109	0.123	0.378	0.101	0.199	0.166	0.09	0.15	0.1	0.085	0.109	0.1	0.1	0.085	0.094	0.083	0.087	0.103	0.1	0.1	0.09	0.087	0.088	0.095	0.092	0.104	0.102	0.124	0.09	0.097	0.105	0.097	0.093	0.087	0.092	0.105	0.105	0.09	0.09	0.09	0.094	0.09	0.113	0.087	0.112	0.094	0.091
229.038	0.292	0.117	0.117	0.132	0.363	0.105	0.215	0.169	0.091	0.149	0.102	0.084	0.114	0.097	0.101	0.087	0.095	0.081	0.086	0.102	0.096	0.099	0.081	0.088	0.085	0.096	0.094	0.104	0.1	0.135	0.092	0.096	0.106	0.095	0.092	0.088	0.094	0.107	0.104	0.093	0.097	0.092	0.094	0.09	0.114	0.089	0.117	0.095	0.09
229.79	0.311	0.118	0.114	0.127	0.398	0.108	0.216	0.169	0.091	0.152	0.101	0.086	0.109	0.096	0.099	0.088	0.097	0.083	0.09	0.105	0.096	0.099	0.088	0.087	0.085	0.093	0.094	0.104	0.102	0.133	0.087	0.095	0.104	0.096	0.094	0.088	0.094	0.104	0.106	0.089	0.092	0.093	0.095	0.094	0.111	0.09	0.121	0.095	0.088
230.51	0.309	0.118	0.112	0.13	0.357	0.106	0.22	0.166	0.091	0.151	0.101	0.083	0.114	0.097	0.103	0.084	0.094	0.085	0.086	0.105	0.099	0.104	0.085	0.087	0.082	0.096	0.093	0.103	0.103	0.135	0.091	0.098	0.104	0.098	0.094	0.087	0.095	0.105	0.104	0.092	0.095	0.093	0.096	0.095	0.11	0.093	0.12	0.096	0.092
231.294	0.337	0.118	0.113	0.132	0.368	0.103	0.227	0.178	0.091	0.158	0.101	0.083	0.112	0.1	0.104	0.084	0.096	0.085	0.088	0.104	0.097	0.103	0.088	0.089	0.087	0.096	0.094	0.104	0.104	0.139	0.091	0.096	0.104	0.097	0.091	0.087	0.092	0.104	0.105	0.09	0.096	0.095	0.095	0.093	0.118	0.092	0.123	0.098	0.094
232.028	0.344	0.121	0.114	0.131	0.394	0.103	0.232	0.169	0.094	0.155	0.1	0.082	0.113	0.096	0.104	0.087	0.095	0.086	0.085	0.107	0.098	0.098	0.087	0.088	0.087	0.095	0.094	0.105	0.101	0.126	0.092	0.097	0.104	0.098	0.094	0.084	0.092	0.107	0.098	0.092	0.095	0.1	0.095	0.095	0.11	0.091	0.124	0.097	0.092
232.765	0.364	0.122	0.114	0.134	0.415	0.11	0.238	0.182	0.093	0.162	0.103	0.086	0.113	0.101	0.101	0.087	0.096	0.085	0.089	0.106	0.102	0.102	0.087	0.089	0.084	0.096	0.094	0.102	0.105	0.131	0.089	0.096	0.104	0.098	0.092	0.088	0.092	0.104	0.101	0.093	0.095	0.097	0.095	0.097	0.115	0.093	0.13	0.097	0.089
233.548	0.358	0.121	0.114	0.135	0.405	0.102	0.241	0.176	0.094	0.161	0.102	0.087	0.114	0.1	0.106	0.086	0.098	0.08	0.089	0.107	0.103	0.102	0.089	0.09	0.084	0.094	0.094	0.105	0.105	0.13	0.09	0.094	0.104	0.098	0.092	0.086	0.091	0.102	0.104	0.093	0.094	0.098	0.097	0.098	0.112	0.091	0.136	0.1	0.094
234.283	0.372	0.119	0.114	0.137	0.414	0.109	0.241	0.176	0.095	0.163	0.108	0.084	0.104	0.092	0.093	0.076	0.083	0.071	0.078	0.1	0.085	0.089	0.075	0.083	0.075	0.091	0.086	0.095	0.1	0.123	0.081	0.089	0.098	0.093	0.083	0.08	0.084	0.096	0.096	0.085	0.089	0.092	0.09	0.091	0.118	0.086	0.133	0.091	0.088
235.034	0.381	0.122	0.115	0.134	0.432	0.108	0.246	0.182	0.093	0.169	0.107	0.079	0.109	0.093	0.092	0.077	0.087	0.072	0.079	0.101	0.088	0.092	0.075	0.086	0.081	0.091	0.089	0.099	0.101	0.126	0.083	0.09	0.098	0.093	0.084	0.082	0.081	0.094	0.096	0.082	0.088	0.093	0.089	0.091	0.099	0.085	0.135	0.089	0.087
235.771	0.415	0.122	0.116	0.137	0.416	0.106	0.251	0.183	0.095	0.174	0.107	0.078	0.106	0.088	0.091	0.08	0.083	0.069	0.075	0.102	0.086	0.089	0.074	0.081	0.076	0.092	0.084	0.096	0.099	0.123	0.082	0.089	0.098	0.092	0.081	0.079	0.08	0.091	0.093	0.083	0.086	0.093	0.09	0.088	0.103	0.085	0.136	0.09	0.087
236.57	0.405	0.12	0.116	0.139	0.419	0.108	0.253	0.185	0.096	0.174	0.108	0.079	0.106	0.092	0.095	0.078	0.087	0.068	0.08	0.101	0.087	0.092	0.074	0.084	0.078	0.091	0.085	0.099	0.103	0.124	0.081	0.086	0.098	0.092	0.083	0.078	0.082	0.096	0.098	0.08	0.089	0.093	0.088	0.09	0.105	0.086	0.141	0.089	0.085
237.321	0.418	0.121	0.118	0.146	0.424	0.109	0.253	0.187	0.096	0.174	0.112	0.08	0.108	0.089	0.092	0.076	0.088	0.07	0.078	0.101	0.086	0.092	0.072	0.086	0.076	0.09	0.088	0.098	0.104	0.121	0.084	0.089	0.102	0.094	0.082	0.081	0.081	0.093	0.094	0.084	0.087	0.097	0.089	0.091	0.095	0.088	0.145	0.09	0.086
238.073	0.434	0.12	0.118	0.146	0.442	0.112	0.264	0.195	0.099	0.185	0.115	0.085	0.113	0.098	0.104	0.086	0.094	0.083	0.088	0.107	0.101	0.101	0.08	0.089	0.085	0.095	0.092	0.104	0.111	0.13	0.093	0.098	0.107	0.101	0.093	0.085	0.095	0.102	0.109	0.09	0.093	0.107	0.097	0.097	0.118	0.097	0.166	0.1	0.092
238.889	0.452	0.123	0.11	0.14	0.427	0.109	0.264	0.187	0.098	0.188	0.112	0.08	0.11	0.093	0.097	0.08	0.087	0.073	0.081	0.105	0.091	0.092	0.071	0.083	0.078	0.09	0.088	0.099	0.104	0.124	0.083	0.089	0.1	0.095	0.082	0.079	0.083	0.095	0.097	0.081	0.088	0.099	0.088	0.092	0.103	0.088	0.156	0.092	0.085
239.693	0.465	0.126	0.117	0.145	0.437	0.113	0.264	0.19	0.099	0.187	0.115	0.081	0.109	0.086	0.096	0.078	0.087	0.07	0.077	0.104	0.09	0.091	0.074	0.083	0.076	0.089	0.086	0.098	0.107	0.124	0.079	0.091	0.098	0.096	0.087	0.082	0.087	0.095	0.1	0.081	0.088	0.102	0.09	0.089	0.095	0.09	0.159	0.091	0.084
240.423	0.471	0.121	0.119	0.149	0.428	0.115	0.265	0.189	0.098	0.191	0.12	0.087	0.116	0.101	0.104	0.089	0.096	0.079	0.089	0.111	0.102	0.1	0.089	0.09	0.09	0.098	0.095	0.104	0.116	0.136	0.093	0.096	0.107	0.103	0.093	0.087	0.094	0.103	0.106	0.093	0.096	0.118	0.098	0.1	0.121	0.097	0.172	0.101	0.092
241.178	0.448	0.122	0.119	0.149	0.419	0.111	0.268	0.19	0.101	0.197	0.116	0.087	0.116	0.1	0.105	0.086	0.098	0.085	0.091	0.112	0.099	0.1	0.084	0.092	0.09	0.096	0.094	0.105	0.117	0.133	0.091	0.096	0.108	0.103	0.094	0.088	0.096	0.102	0.104	0.092	0.097	0.116	0.096	0.098	0.115	0.098	0.174	0.101	0.093
241.943	0.47	0.124	0.114	0.15	0.452	0.11	0.269	0.197	0.099	0.197	0.118	0.09	0.119	0.103	0.11	0.089	0.099	0.084	0.089	0.112	0.1	0.104	0.085	0.091	0.088	0.097	0.093	0.105	0.116	0.131	0.092	0.097	0.111	0.103	0.096	0.09	0.095	0.105	0.107	0.092	0.095	0.123	0.097	0.101	0.119	0.099	0.179	0.1	0.092
242.794	0.507	0.122	0.117	0.151	0.436	0.114	0.276	0.196	0.1	0.199	0.117	0.09	0.121	0.102	0.105	0.089	0.095	0.079	0.088	0.112	0.101	0.1	0.083	0.092	0.088	0.097	0.092	0.105	0.118	0.136	0.091	0.097	0.108	0.105	0.096	0.085	0.099	0.104	0.107	0.094	0.099	0.122	0.097	0.102	0.119	0.099	0.181	0.102	0.093
243.54	0.489	0.128	0.12	0.154	0.407	0.115	0.272	0.199	0.099	0.209	0.122	0.089	0.121	0.101	0.107	0.09	0.095	0.087	0.087	0.113	0.104	0.105	0.089	0.093	0.092	0.096	0.094	0.104	0.118	0.137	0.088	0.097	0.109	0.105	0.097	0.089	0.099	0.103	0.104	0.097	0.097	0.133	0.096	0.096	0.119	0.101	0.184	0.103	0.093
244.266	0.501	0.125	0.119	0.155	0.459	0.114	0.276	0.205	0.099	0.214	0.119	0.088	0.118	0.102	0.107	0.089	0.094	0.082	0.082	0.114	0.101	0.102	0.084	0.092	0.087	0.096	0.094	0.103	0.119	0.131	0.089	0.096	0.11	0.104	0.095	0.087	0.092	0.108	0.105	0.095	0.095	0.141	0.095	0.103	0.116	0.098	0.184	0.1	0.093
245.097	0.534	0.126	0.119	0.162	0.44	0.116	0.282	0.205	0.101	0.214	0.122	0.078	0.108	0.085	0.097	0.085	0.088	0.074	0.078	0.109	0.089	0.093	0.071	0.087	0.081	0.091	0.089	0.097	0.114	0.127	0.078	0.086	0.1	0.098	0.086	0.08	0.09	0.099	0.098	0.087	0.089	0.14	0.09	0.091	0.098	0.087	0.176	0.095	0.084
245.828	0.506	0.126	0.119	0.158	0.432	0.117	0.276	0.199	0.1	0.217	0.121	0.08	0.113	0.091	0.099	0.082	0.088	0.072	0.077	0.111	0.089	0.095	0.072	0.087	0.08	0.092	0.087	0.097	0.117	0.129	0.081	0.092	0.101	0.099	0.085	0.08	0.085	0.098	0.099	0.092	0.09	0.146	0.09	0.091	0.105	0.093	0.18	0.094	0.084
246.579	0.561	0.126	0.117	0.165	0.474	0.117	0.291	0.208	0.101	0.223	0.125	0.084	0.113	0.091	0.1	0.082	0.09	0.075	0.079	0.109	0.088	0.095	0.069	0.089	0.078	0.091	0.087	0.098	0.117	0.131	0.082	0.089	0.103	0.099	0.084	0.082	0.088	0.099	0.096	0.088	0.091	0.155	0.091	0.095	0.106	0.092	0.189	0.093	0.09
247.395	0.568	0.126	0.12	0.166	0.448	0.113	0.289	0.205	0.102	0.23	0.127	0.091	0.122	0.104	0.106	0.09	0.098	0.082	0.089	0.117	0.101	0.105	0.082	0.095	0.089	0.097	0.094	0.106	0.122	0.136	0.089	0.095	0.109	0.107	0.094	0.088	0.1	0.111	0.107	0.097	0.099	0.176	0.098	0.105	0.119	0.101	0.201	0.103	0.092
248.194	0.6	0.131	0.12	0.174	0.453	0.118	0.292	0.217	0.102	0.235	0.133	0.089	0.121	0.101	0.11	0.09	0.095	0.084	0.089	0.118	0.103	0.106	0.088	0.09	0.088	0.094	0.095	0.105	0.123	0.143	0.093	0.095	0.11	0.108	0.096	0.087	0.098	0.109	0.109	0.101	0.099	0.187	0.098	0.108	0.114	0.102	0.202	0.103	0.093
248.93	0.566	0.128	0.117	0.172	0.445	0.118	0.289	0.213	0.103	0.234	0.134	0.09	0.123	0.1	0.107	0.091	0.095	0.08	0.087	0.118	0.097	0.105	0.084	0.092	0.09	0.097	0.095	0.105	0.123	0.14	0.096	0.098	0.109	0.107	0.099	0.089	0.098	0.108	0.11	0.102	0.099	0.197	0.1	0.108	0.129	0.105	0.2	0.101	0.095
249.665	0.584	0.127	0.118	0.174	0.445	0.116	0.292	0.211	0.101	0.234	0.134	0.084	0.109	0.089	0.097	0.08	0.088	0.073	0.075	0.113	0.091	0.095	0.069	0.089	0.083	0.091	0.089	0.1	0.117	0.129	0.084	0.089	0.1	0.1	0.084	0.079	0.085	0.096	0.094	0.094	0.092	0.193	0.092	0.097	0.112	0.093	0.192	0.093	0.088
250.385	0.593	0.131	0.118	0.178	0.467	0.123	0.291	0.217	0.1	0.241	0.138	0.088	0.124	0.1	0.106	0.088	0.095	0.084	0.089	0.12	0.102	0.105	0.084	0.093	0.088	0.096	0.096	0.106	0.125	0.138	0.092	0.097	0.108	0.107	0.096	0.089	0.1	0.11	0.106	0.11	0.097	0.216	0.099	0.112	0.129	0.1	0.207	0.102	0.092
251.134	0.603	0.132	0.121	0.189	0.457	0.12	0.301	0.214	0.1	0.24	0.135	0.088	0.12	0.099	0.103	0.088	0.096	0.08	0.088	0.12	0.103	0.103	0.085	0.094	0.087	0.094	0.094	0.105	0.126	0.138	0.094	0.095	0.108	0.108	0.095	0.088	0.1	0.108	0.108	0.104	0.099	0.221	0.099	0.111	0.111	0.103	0.206	0.102	0.092
251.933	0.584	0.132	0.125	0.184	0.444	0.123	0.308	0.215	0.102	0.244	0.14	0.086	0.121	0.098	0.108	0.092	0.094	0.083	0.087	0.12	0.101	0.104	0.086	0.094	0.09	0.095	0.097	0.107	0.126	0.137	0.094	0.096	0.11	0.107	0.096	0.088	0.099	0.109	0.107	0.108	0.1	0.224	0.097	0.11	0.122	0.107	0.22	0.101	0.087
252.722	0.613	0.132	0.12	0.183	0.444	0.122	0.301	0.224	0.105	0.241	0.147	0.082	0.115	0.091	0.092	0.084	0.085	0.073	0.077	0.115	0.092	0.093	0.07	0.087	0.08	0.093	0.088	0.099	0.123	0.127	0.084	0.089	0.101	0.102	0.087	0.08	0.085	0.094	0.096	0.097	0.092	0.213	0.091	0.1	0.105	0.097	0.199	0.096	0.087
253.486	0.645	0.133	0.121	0.192	0.454	0.122	0.311	0.219	0.103	0.248	0.143	0.079	0.115	0.091	0.096	0.085	0.086	0.074	0.077	0.115	0.092	0.096	0.075	0.089	0.083	0.093	0.09	0.101	0.126	0.129	0.088	0.092	0.103	0.104	0.088	0.081	0.089	0.099	0.097	0.097	0.092	0.214	0.092	0.103	0.099	0.097	0.203	0.094	0.085
254.332	0.662	0.131	0.121	0.198	0.487	0.128	0.309	0.22	0.103	0.252	0.141	0.086	0.127	0.101	0.111	0.094	0.095	0.085	0.09	0.122	0.102	0.101	0.082	0.096	0.09	0.097	0.099	0.106	0.131	0.138	0.099	0.099	0.11	0.11	0.099	0.092	0.098	0.109	0.109	0.111	0.096	0.236	0.1	0.113	0.123	0.108	0.228	0.104	0.094
255.151	0.618	0.131	0.121	0.198	0.463	0.13	0.313	0.221	0.104	0.249	0.142	0.088	0.125	0.1	0.105	0.092	0.097	0.085	0.089	0.123	0.1	0.107	0.082	0.095	0.087	0.098	0.098	0.107	0.134	0.143	0.099	0.098	0.112	0.111	0.099	0.092	0.097	0.107	0.107	0.107	0.103	0.239	0.1	0.119	0.123	0.11	0.222	0.105	0.098
255.901	0.631	0.132	0.124	0.206	0.468	0.124	0.311	0.227	0.103	0.251	0.145	0.082	0.117	0.091	0.097	0.087	0.086	0.073	0.081	0.12	0.091	0.095	0.077	0.091	0.081	0.09	0.092	0.1	0.126	0.131	0.095	0.089	0.104	0.106	0.091	0.082	0.087	0.098	0.096	0.101	0.093	0.23	0.093	0.11	0.116	0.104	0.215	0.096	0.086
256.668	0.647	0.133	0.123	0.211	0.438	0.125	0.312	0.226	0.105	0.252	0.143	0.083	0.12	0.09	0.097	0.083	0.088	0.074	0.082	0.119	0.092	0.092	0.071	0.092	0.081	0.089	0.093	0.1	0.127	0.126	0.094	0.09	0.102	0.103	0.087	0.083	0.084	0.097	0.093	0.105	0.09	0.228	0.094	0.116	0.101	0.102	0.214	0.097	0.087
257.42	0.65	0.133	0.123	0.202	0.457	0.123	0.324	0.223	0.106	0.255	0.148	0.088	0.129	0.099	0.108	0.093	0.096	0.086	0.092	0.124	0.101	0.104	0.086	0.097	0.088	0.096	0.098	0.106	0.134	0.137	0.103	0.097	0.11	0.11	0.098	0.09	0.101	0.11	0.106	0.113	0.099	0.245	0.1	0.127	0.137	0.111	0.229	0.106	0.094
258.172	0.646	0.134	0.122	0.204	0.458	0.129	0.332	0.227	0.106	0.259	0.152	0.087	0.125	0.101	0.112	0.094	0.097	0.088	0.091	0.127	0.107	0.105	0.088	0.096	0.092	0.096	0.097	0.108	0.138	0.142	0.105	0.098	0.111	0.111	0.097	0.091	0.097	0.109	0.107	0.12	0.099	0.243	0.099	0.126	0.118	0.111	0.232	0.106	0.093
258.939	0.677	0.137	0.124	0.207	0.446	0.132	0.334	0.231	0.104	0.262	0.149	0.083	0.116	0.088	0.097	0.086	0.09	0.077	0.079	0.122	0.091	0.095	0.072	0.092	0.084	0.091	0.089	0.1	0.129	0.136	0.094	0.09	0.104	0.104	0.088	0.084	0.088	0.099	0.096	0.105	0.096	0.227	0.093	0.12	0.11	0.105	0.213	0.1	0.085
259.69	0.621	0.132	0.124	0.204	0.463	0.13	0.329	0.223	0.106	0.256	0.154	0.082	0.12	0.094	0.099	0.086	0.087	0.073	0.081	0.122	0.094	0.099	0.072	0.092	0.081	0.091	0.089	0.098	0.127	0.136	0.093	0.09	0.104	0.104	0.087	0.084	0.087	0.099	0.098	0.11	0.095	0.232	0.092	0.115	0.116	0.109	0.225	0.101	0.083
260.443	0.63	0.136	0.122	0.208	0.439	0.127	0.327	0.228	0.106	0.264	0.153	0.081	0.121	0.089	0.098	0.087	0.091	0.074	0.082	0.122	0.097	0.095	0.072	0.092	0.083	0.092	0.09	0.102	0.128	0.134	0.096	0.091	0.106	0.106	0.09	0.083	0.088	0.094	0.093	0.108	0.094	0.224	0.096	0.118	0.119	0.108	0.23	0.103	0.085
261.194	0.619	0.135	0.126	0.216	0.45	0.132	0.324	0.23	0.108	0.262	0.154	0.089	0.126	0.098	0.11	0.097	0.095	0.083	0.09	0.132	0.108	0.104	0.084	0.098	0.09	0.096	0.099	0.106	0.138	0.146	0.104	0.099	0.109	0.114	0.094	0.089	0.096	0.108	0.106	0.123	0.1	0.246	0.101	0.131	0.139	0.117	0.249	0.111	0.093
261.95	0.658	0.139	0.122	0.211	0.476	0.13	0.332	0.228	0.106	0.26	0.157	0.085	0.116	0.089	0.095	0.085	0.087	0.073	0.083	0.126	0.095	0.094	0.074	0.089	0.082	0.089	0.089	0.096	0.127	0.135	0.095	0.091	0.104	0.104	0.091	0.083	0.089	0.098	0.102	0.11	0.093	0.232	0.094	0.126	0.115	0.111	0.229	0.101	0.089
262.702	0.589	0.129	0.114	0.208	0.414	0.124	0.306	0.217	0.101	0.255	0.145	0.082	0.115	0.091	0.098	0.086	0.089	0.075	0.083	0.127	0.094	0.094	0.073	0.091	0.08	0.092	0.09	0.1	0.132	0.131	0.097	0.09	0.104	0.107	0.091	0.081	0.09	0.099	0.099	0.113	0.094	0.232	0.095	0.124	0.119	0.11	0.238	0.102	0.085
263.446	0.605	0.14	0.126	0.222	0.461	0.131	0.327	0.237	0.109	0.272	0.158	0.082	0.118	0.09	0.099	0.087	0.086	0.077	0.083	0.129	0.097	0.095	0.077	0.091	0.082	0.09	0.091	0.099	0.13	0.137	0.096	0.092	0.103	0.104	0.089	0.083	0.091	0.102	0.099	0.115	0.093	0.218	0.096	0.129	0.115	0.11	0.239	0.104	0.088
264.2	0.623	0.144	0.123	0.227	0.437	0.127	0.339	0.232	0.11	0.269	0.16	0.083	0.125	0.09	0.1	0.089	0.089	0.078	0.078	0.128	0.09	0.093	0.074	0.088	0.078	0.089	0.089	0.098	0.128	0.136	0.096	0.093	0.101	0.11	0.091	0.085	0.093	0.103	0.102	0.119	0.095	0.236	0.097	0.136	0.117	0.117	0.246	0.107	0.088
264.951	0.648	0.142	0.125	0.228	0.47	0.132	0.341	0.234	0.109	0.272	0.166	0.088	0.132	0.102	0.11	0.097	0.097	0.087	0.093	0.136	0.114	0.107	0.084	0.099	0.095	0.096	0.098	0.106	0.142	0.143	0.103	0.101	0.11	0.117	0.101	0.091	0.1	0.114	0.111	0.134	0.106	0.254	0.101	0.143	0.135	0.128	0.259	0.116	0.095
265.703	0.62	0.143	0.13	0.23	0.469	0.128	0.35	0.24	0.112	0.278	0.167	0.083	0.125	0.089	0.091	0.086	0.088	0.075	0.081	0.126	0.096	0.094	0.071	0.091	0.081	0.089	0.089	0.1	0.131	0.133	0.095	0.092	0.104	0.108	0.09	0.087	0.09	0.102	0.101	0.124	0.097	0.239	0.099	0.136	0.119	0.119	0.259	0.113	0.092
266.454	0.645	0.145	0.125	0.229	0.457	0.129	0.345	0.234	0.111	0.279	0.167	0.084	0.122	0.093	0.094	0.093	0.088	0.075	0.083	0.13	0.102	0.102	0.073	0.092	0.086	0.089	0.092	0.099	0.133	0.136	0.092	0.093	0.101	0.108	0.09	0.083	0.085	0.1	0.097	0.122	0.095	0.241	0.094	0.135	0.128	0.119	0.255	0.109	0.088
267.207	0.619	0.148	0.129	0.244	0.486	0.134	0.351	0.235	0.114	0.282	0.171	0.082	0.123	0.091	0.096	0.091	0.089	0.074	0.082	0.132	0.1	0.097	0.074	0.089	0.085	0.09	0.09	0.098	0.132	0.127	0.094	0.094	0.105	0.11	0.09	0.083	0.088	0.101	0.098	0.126	0.094	0.238	0.096	0.138	0.109	0.12	0.247	0.111	0.088
267.957	0.636	0.145	0.127	0.246	0.453	0.134	0.357	0.237	0.113	0.288	0.172	0.081	0.122	0.093	0.102	0.092	0.093	0.079	0.084	0.132	0.1	0.098	0.075	0.092	0.085	0.091	0.09	0.1	0.135	0.135	0.093	0.094	0.104	0.11	0.092	0.084	0.088	0.103	0.102	0.124	0.097	0.242	0.096	0.138	0.127	0.121	0.256	0.112	0.087
268.693	0.636	0.15	0.127	0.238	0.472	0.139	0.361	0.245	0.113	0.285	0.18	0.085	0.119	0.096	0.101	0.096	0.091	0.075	0.085	0.133	0.099	0.1	0.074	0.091	0.085	0.093	0.093	0.103	0.137	0.134	0.091	0.094	0.103	0.109	0.089	0.085	0.09	0.1	0.1	0.131	0.096	0.248	0.097	0.152	0.124	0.121	0.277	0.113	0.088
269.444	0.656	0.147	0.132	0.246	0.478	0.131	0.356	0.246	0.117	0.287	0.179	0.08	0.123	0.092	0.096	0.096	0.091	0.082	0.085	0.133	0.102	0.097	0.075	0.092	0.086	0.09	0.092	0.098	0.137	0.132	0.096	0.093	0.103	0.109	0.094	0.085	0.089	0.102	0.101	0.135	0.097	0.255	0.095	0.143	0.119	0.123	0.265	0.113	0.091
270.213	0.62	0.148	0.128	0.244	0.454	0.142	0.36	0.24	0.117	0.284	0.181	0.082	0.125	0.093	0.101	0.099	0.091	0.08	0.087	0.134	0.102	0.1	0.074	0.093	0.083	0.089	0.093	0.1	0.143	0.131	0.091	0.096	0.101	0.112	0.092	0.085	0.093	0.105	0.101	0.139	0.098	0.259	0.1	0.152	0.127	0.126	0.273	0.12	0.09
270.964	0.632	0.15	0.128	0.25	0.482	0.132	0.356	0.238	0.118	0.288	0.187	0.081	0.124	0.094	0.099	0.098	0.091	0.08	0.085	0.133	0.105	0.1	0.07	0.092	0.082	0.091	0.092	0.1	0.14	0.13	0.099	0.097	0.103	0.113	0.087	0.086	0.088	0.099	0.101	0.14	0.099	0.265	0.096	0.158	0.126	0.128	0.281	0.115	0.092
271.699	0.62	0.153	0.126	0.239	0.473	0.135	0.362	0.242	0.12	0.289	0.188	0.091	0.139	0.106	0.115	0.113	0.104	0.096	0.096	0.139	0.117	0.109	0.091	0.099	0.095	0.097	0.099	0.105	0.159	0.145	0.105	0.104	0.113	0.118	0.099	0.094	0.101	0.113	0.111	0.161	0.106	0.276	0.104	0.168	0.143	0.141	0.303	0.125	0.097
272.45	0.607	0.152	0.131	0.258	0.503	0.143	0.37	0.251	0.118	0.306	0.192	0.091	0.138	0.103	0.113	0.113	0.1	0.096	0.096	0.14	0.116	0.107	0.088	0.098	0.094	0.095	0.099	0.109	0.157	0.147	0.101	0.102	0.113	0.121	0.1	0.094	0.102	0.114	0.111	0.168	0.107	0.287	0.105	0.172	0.149	0.143	0.295	0.128	0.099
273.202	0.622	0.155	0.13	0.251	0.458	0.144	0.378	0.248	0.12	0.294	0.199	0.085	0.129	0.098	0.1	0.107	0.09	0.084	0.082	0.136	0.108	0.099	0.073	0.093	0.086	0.091	0.093	0.1	0.142	0.136	0.097	0.096	0.106	0.114	0.093	0.087	0.092	0.101	0.103	0.158	0.099	0.262	0.096	0.165	0.13	0.138	0.292	0.119	0.088
273.938	0.595	0.156	0.13	0.257	0.476	0.14	0.373	0.254	0.121	0.294	0.193	0.081	0.129	0.093	0.104	0.108	0.092	0.082	0.086	0.135	0.103	0.099	0.074	0.096	0.085	0.093	0.094	0.1	0.146	0.134	0.094	0.096	0.104	0.115	0.09	0.086	0.09	0.102	0.1	0.162	0.097	0.271	0.097	0.17	0.125	0.135	0.298	0.119	0.089
274.704	0.588	0.161	0.13	0.26	0.467	0.135	0.355	0.249	0.121	0.297	0.193	0.086	0.127	0.093	0.098	0.106	0.093	0.078	0.085	0.135	0.103	0.098	0.073	0.093	0.084	0.09	0.094	0.099	0.149	0.136	0.097	0.099	0.106	0.114	0.094	0.086	0.094	0.101	0.105	0.159	0.097	0.263	0.096	0.167	0.126	0.135	0.309	0.117	0.093
275.457	0.595	0.161	0.131	0.254	0.513	0.142	0.36	0.246	0.123	0.305	0.189	0.084	0.128	0.091	0.1	0.108	0.093	0.083	0.087	0.136	0.103	0.097	0.073	0.095	0.083	0.092	0.096	0.1	0.145	0.133	0.096	0.096	0.106	0.114	0.091	0.089	0.091	0.105	0.101	0.16	0.099	0.267	0.096	0.172	0.132	0.14	0.315	0.121	0.09
276.256	0.598	0.164	0.138	0.277	0.468	0.144	0.363	0.259	0.122	0.306	0.193	0.081	0.126	0.092	0.098	0.106	0.092	0.083	0.082	0.137	0.106	0.1	0.077	0.094	0.085	0.09	0.091	0.103	0.147	0.139	0.099	0.095	0.111	0.116	0.09	0.088	0.089	0.098	0.1	0.166	0.096	0.265	0.096	0.175	0.121	0.137	0.298	0.122	0.087
277.042	0.628	0.161	0.135	0.273	0.467	0.14	0.356	0.25	0.122	0.302	0.194	0.089	0.132	0.094	0.095	0.111	0.09	0.081	0.085	0.138	0.109	0.099	0.076	0.096	0.084	0.088	0.092	0.101	0.149	0.137	0.094	0.096	0.105	0.117	0.093	0.088	0.095	0.103	0.103	0.173	0.1	0.278	0.101	0.177	0.129	0.145	0.323	0.124	0.092
277.791	0.615	0.17	0.133	0.261	0.452	0.147	0.364	0.255	0.126	0.315	0.197	0.083	0.134	0.094	0.103	0.116	0.09	0.083	0.085	0.139	0.108	0.099	0.076	0.096	0.082	0.091	0.092	0.1	0.144	0.137	0.096	0.096	0.108	0.117	0.092	0.086	0.096	0.107	0.103	0.169	0.101	0.268	0.097	0.182	0.135	0.147	0.322	0.124	0.09
278.542	0.619	0.168	0.137	0.277	0.495	0.147	0.377	0.253	0.124	0.313	0.196	0.086	0.134	0.094	0.101	0.115	0.095	0.086	0.085	0.139	0.105	0.099	0.075	0.097	0.087	0.091	0.095	0.102	0.149	0.132	0.095	0.097	0.11	0.12	0.096	0.089	0.094	0.106	0.107	0.166	0.099	0.272	0.098	0.185	0.126	0.146	0.315	0.121	0.092
279.294	0.643	0.169	0.137	0.288	0.449	0.15	0.372	0.258	0.125	0.32	0.203	0.089	0.131	0.099	0.102	0.119	0.096	0.081	0.091	0.141	0.104	0.1	0.075	0.099	0.084	0.092	0.092	0.103	0.155	0.131	0.097	0.098	0.107	0.123	0.093	0.087	0.094	0.105	0.102	0.18	0.102	0.279	0.098	0.182	0.134	0.149	0.332	0.123	0.092
280.046	0.599	0.178	0.134	0.284	0.483	0.145	0.368	0.261	0.122	0.315	0.2	0.084	0.131	0.095	0.101	0.117	0.097	0.086	0.088	0.142	0.11	0.101	0.074	0.097	0.084	0.091	0.094	0.1	0.153	0.133	0.095	0.1	0.109	0.118	0.094	0.088	0.095	0.102	0.1	0.186	0.102	0.279	0.095	0.184	0.127	0.149	0.31	0.123	0.089
280.813	0.623	0.181	0.14	0.283	0.45	0.152	0.362	0.262	0.126	0.318	0.211	0.084	0.133	0.096	0.103	0.122	0.094	0.085	0.085	0.144	0.112	0.1	0.076	0.098	0.084	0.092	0.092	0.099	0.149	0.139	0.096	0.097	0.111	0.124	0.095	0.089	0.094	0.099	0.099	0.184	0.103	0.274	0.1	0.187	0.122	0.15	0.329	0.126	0.089
281.564	0.612	0.179	0.141	0.3	0.48	0.154	0.383	0.252	0.13	0.314	0.21	0.086	0.135	0.099	0.102	0.128	0.096	0.084	0.09	0.146	0.114	0.102	0.079	0.098	0.086	0.092	0.094	0.102	0.155	0.139	0.098	0.1	0.113	0.12	0.092	0.091	0.093	0.107	0.101	0.192	0.104	0.291	0.097	0.189	0.131	0.158	0.327	0.125	0.091
282.396	0.577	0.181	0.14	0.296	0.489	0.154	0.385	0.261	0.131	0.324	0.218	0.085	0.137	0.097	0.102	0.124	0.09	0.081	0.085	0.148	0.115	0.1	0.076	0.095	0.084	0.091	0.091	0.099	0.15	0.142	0.098	0.096	0.112	0.125	0.094	0.091	0.096	0.108	0.106	0.196	0.103	0.294	0.102	0.197	0.127	0.159	0.316	0.127	0.09
283.129	0.61	0.188	0.143	0.299	0.472	0.15	0.375	0.269	0.134	0.323	0.215	0.086	0.134	0.101	0.106	0.135	0.098	0.088	0.089	0.15	0.114	0.099	0.077	0.097	0.083	0.091	0.096	0.101	0.155	0.143	0.096	0.1	0.115	0.123	0.096	0.091	0.096	0.108	0.104	0.201	0.104	0.297	0.099	0.196	0.15	0.157	0.325	0.128	0.092
283.883	0.569	0.183	0.127	0.283	0.473	0.142	0.353	0.249	0.126	0.311	0.196	0.086	0.137	0.097	0.105	0.139	0.094	0.082	0.085	0.152	0.116	0.101	0.079	0.099	0.086	0.093	0.095	0.103	0.16	0.148	0.099	0.102	0.114	0.123	0.097	0.091	0.095	0.107	0.11	0.2	0.107	0.304	0.098	0.197	0.141	0.163	0.337	0.129	0.091
284.623	0.627	0.195	0.141	0.322	0.482	0.158	0.381	0.266	0.135	0.331	0.219	0.086	0.139	0.099	0.111	0.141	0.096	0.087	0.091	0.152	0.113	0.102	0.074	0.099	0.084	0.091	0.093	0.099	0.152	0.138	0.097	0.099	0.113	0.121	0.095	0.091	0.099	0.109	0.109	0.192	0.104	0.289	0.1	0.191	0.131	0.16	0.34	0.127	0.092
285.385	0.634	0.198	0.144	0.32	0.493	0.155	0.399	0.259	0.135	0.334	0.217	0.086	0.139	0.098	0.111	0.144	0.096	0.085	0.087	0.154	0.115	0.102	0.08	0.099	0.086	0.093	0.096	0.102	0.158	0.135	0.099	0.101	0.119	0.123	0.099	0.091	0.096	0.105	0.106	0.208	0.109	0.301	0.098	0.191	0.132	0.163	0.347	0.129	0.089
286.121	0.594	0.199	0.14	0.308	0.454	0.152	0.381	0.268	0.139	0.33	0.219	0.087	0.139	0.098	0.11	0.148	0.097	0.086	0.091	0.153	0.116	0.104	0.071	0.099	0.085	0.092	0.094	0.102	0.155	0.145	0.098	0.102	0.118	0.122	0.096	0.091	0.096	0.108	0.11	0.211	0.105	0.309	0.098	0.199	0.13	0.17	0.348	0.129	0.093
286.889	0.604	0.204	0.142	0.316	0.454	0.16	0.366	0.264	0.139	0.333	0.21	0.082	0.143	0.101	0.111	0.154	0.099	0.087	0.088	0.157	0.119	0.1	0.077	0.099	0.088	0.093	0.095	0.101	0.159	0.142	0.095	0.1	0.122	0.121	0.094	0.091	0.097	0.112	0.107	0.208	0.109	0.321	0.097	0.2	0.129	0.17	0.346	0.133	0.094
287.704	0.594	0.205	0.142	0.316	0.503	0.155	0.374	0.265	0.143	0.327	0.216	0.093	0.154	0.112	0.119	0.17	0.111	0.098	0.1	0.166	0.13	0.112	0.087	0.107	0.097	0.1	0.103	0.11	0.169	0.153	0.11	0.111	0.134	0.133	0.104	0.102	0.107	0.122	0.115	0.231	0.117	0.323	0.107	0.215	0.146	0.186	0.359	0.144	0.099
288.47	0.588	0.209	0.145	0.316	0.487	0.158	0.376	0.268	0.146	0.326	0.217	0.086	0.14	0.099	0.106	0.16	0.099	0.083	0.09	0.161	0.118	0.105	0.077	0.096	0.09	0.092	0.097	0.098	0.16	0.141	0.096	0.102	0.123	0.123	0.097	0.09	0.099	0.105	0.11	0.206	0.107	0.302	0.096	0.2	0.125	0.171	0.327	0.128	0.093
289.208	0.589	0.21	0.141	0.326	0.485	0.161	0.388	0.279	0.147	0.337	0.221	0.085	0.142	0.101	0.11	0.165	0.099	0.087	0.091	0.158	0.12	0.103	0.074	0.099	0.089	0.093	0.096	0.101	0.156	0.143	0.101	0.1	0.125	0.122	0.099	0.094	0.1	0.108	0.109	0.216	0.107	0.326	0.1	0.191	0.125	0.177	0.329	0.13	0.091
289.927	0.603	0.213	0.141	0.325	0.471	0.156	0.369	0.267	0.148	0.331	0.222	0.086	0.147	0.099	0.11	0.17	0.101	0.088	0.088	0.159	0.114	0.106	0.074	0.101	0.085	0.091	0.097	0.101	0.159	0.136	0.099	0.103	0.128	0.126	0.099	0.092	0.101	0.115	0.109	0.216	0.108	0.312	0.101	0.196	0.135	0.175	0.34	0.13	0.089
290.679	0.638	0.216	0.143	0.316	0.505	0.164	0.402	0.282	0.15	0.333	0.222	0.084	0.147	0.101	0.115	0.177	0.097	0.091	0.086	0.164	0.119	0.104	0.072	0.101	0.089	0.092	0.097	0.101	0.164	0.15	0.099	0.101	0.131	0.126	0.097	0.095	0.099	0.11	0.111	0.224	0.107	0.303	0.1	0.205	0.129	0.181	0.342	0.129	0.093
291.446	0.629	0.223	0.146	0.325	0.483	0.165	0.383	0.28	0.154	0.337	0.226	0.084	0.151	0.098	0.115	0.178	0.099	0.089	0.092	0.163	0.116	0.103	0.075	0.103	0.086	0.095	0.097	0.101	0.161	0.148	0.102	0.102	0.13	0.126	0.099	0.092	0.098	0.108	0.108	0.227	0.104	0.317	0.1	0.197	0.14	0.185	0.352	0.131	0.093
292.197	0.612	0.223	0.145	0.343	0.478	0.17	0.399	0.287	0.158	0.342	0.223	0.084	0.151	0.101	0.112	0.183	0.101	0.091	0.087	0.164	0.116	0.105	0.075	0.102	0.089	0.095	0.099	0.102	0.168	0.147	0.106	0.1	0.137	0.128	0.103	0.096	0.101	0.116	0.109	0.231	0.107	0.328	0.099	0.202	0.131	0.186	0.371	0.134	0.094
292.963	0.63	0.225	0.145	0.337	0.502	0.174	0.399	0.283	0.159	0.341	0.23	0.086	0.151	0.099	0.115	0.191	0.099	0.086	0.089	0.168	0.122	0.105	0.078	0.101	0.091	0.096	0.097	0.102	0.167	0.143	0.1	0.106	0.14	0.129	0.101	0.095	0.102	0.109	0.108	0.228	0.107	0.302	0.1	0.204	0.137	0.192	0.354	0.134	0.093
293.722	0.609	0.226	0.15	0.344	0.491	0.172	0.404	0.288	0.161	0.347	0.236	0.086	0.149	0.102	0.117	0.193	0.096	0.094	0.088	0.169	0.115	0.103	0.075	0.102	0.09	0.095	0.099	0.104	0.163	0.141	0.098	0.103	0.144	0.128	0.099	0.095	0.098	0.11	0.109	0.224	0.109	0.319	0.101	0.213	0.144	0.194	0.347	0.136	0.093
294.468	0.609	0.228	0.15	0.335	0.495	0.172	0.412	0.294	0.166	0.348	0.237	0.082	0.149	0.098	0.116	0.194	0.103	0.091	0.093	0.176	0.119	0.107	0.076	0.101	0.086	0.096	0.097	0.101	0.165	0.143	0.096	0.104	0.144	0.132	0.101	0.098	0.101	0.11	0.112	0.216	0.11	0.321	0.101	0.208	0.139	0.198	0.359	0.138	0.097
295.219	0.604	0.235	0.149	0.357	0.517	0.176	0.415	0.301	0.167	0.34	0.239	0.088	0.153	0.102	0.116	0.2	0.104	0.09	0.093	0.177	0.116	0.107	0.077	0.103	0.084	0.098	0.098	0.103	0.168	0.146	0.102	0.106	0.147	0.133	0.1	0.097	0.101	0.111	0.115	0.245	0.112	0.324	0.104	0.21	0.133	0.199	0.385	0.141	0.095
295.972	0.624	0.233	0.149	0.338	0.497	0.175	0.389	0.296	0.17	0.352	0.243	0.086	0.154	0.1	0.113	0.202	0.1	0.091	0.089	0.185	0.119	0.106	0.072	0.104	0.088	0.096	0.097	0.102	0.173	0.142	0.102	0.108	0.151	0.133	0.1	0.097	0.098	0.11	0.108	0.236	0.11	0.338	0.101	0.205	0.131	0.199	0.354	0.14	0.094
296.724	0.551	0.222	0.139	0.308	0.43	0.16	0.365	0.257	0.162	0.313	0.224	0.091	0.158	0.103	0.113	0.209	0.106	0.088	0.096	0.191	0.117	0.109	0.076	0.104	0.089	0.099	0.099	0.105	0.17	0.145	0.1	0.105	0.159	0.134	0.102	0.098	0.102	0.113	0.112	0.237	0.108	0.342	0.102	0.212	0.134	0.212	0.395	0.142	0.1
297.474	0.582	0.237	0.151	0.336	0.489	0.181	0.397	0.302	0.178	0.345	0.243	0.089	0.158	0.1	0.113	0.207	0.103	0.091	0.094	0.194	0.117	0.107	0.076	0.106	0.093	0.098	0.1	0.103	0.169	0.149	0.101	0.104	0.156	0.135	0.102	0.096	0.106	0.114	0.112	0.239	0.11	0.329	0.099	0.212	0.137	0.216	0.368	0.143	0.095
298.211	0.604	0.242	0.154	0.342	0.514	0.179	0.418	0.294	0.184	0.357	0.249	0.095	0.173	0.115	0.13	0.23	0.116	0.103	0.107	0.21	0.135	0.12	0.085	0.11	0.099	0.103	0.105	0.111	0.184	0.157	0.109	0.118	0.171	0.146	0.115	0.108	0.114	0.132	0.121	0.251	0.12	0.346	0.109	0.233	0.153	0.232	0.417	0.154	0.107
298.961	0.588	0.235	0.158	0.345	0.48	0.183	0.397	0.307	0.19	0.349	0.248	0.093	0.161	0.106	0.114	0.215	0.103	0.094	0.095	0.204	0.12	0.108	0.081	0.108	0.091	0.098	0.1	0.105	0.173	0.151	0.102	0.105	0.159	0.139	0.106	0.102	0.102	0.11	0.115	0.229	0.112	0.347	0.102	0.226	0.139	0.218	0.379	0.147	0.096
299.713	0.563	0.239	0.143	0.316	0.495	0.17	0.382	0.287	0.18	0.332	0.226	0.09	0.158	0.103	0.12	0.22	0.102	0.095	0.094	0.21	0.119	0.108	0.073	0.105	0.092	0.099	0.1	0.103	0.165	0.145	0.101	0.106	0.163	0.137	0.102	0.1	0.104	0.113	0.111	0.241	0.11	0.325	0.101	0.213	0.138	0.227	0.404	0.149	0.099
300.464	0.589	0.239	0.157	0.341	0.5	0.18	0.416	0.303	0.196	0.353	0.248	0.09	0.163	0.105	0.117	0.222	0.104	0.096	0.093	0.213	0.119	0.109	0.079	0.105	0.092	0.1	0.099	0.103	0.173	0.144	0.1	0.106	0.168	0.137	0.106	0.1	0.104	0.113	0.112	0.238	0.108	0.339	0.1	0.218	0.141	0.228	0.394	0.148	0.103
301.215	0.565	0.235	0.145	0.314	0.464	0.168	0.398	0.288	0.199	0.338	0.226	0.091	0.16	0.104	0.118	0.223	0.106	0.095	0.093	0.22	0.116	0.111	0.083	0.107	0.09	0.098	0.098	0.102	0.166	0.144	0.099	0.109	0.166	0.141	0.103	0.101	0.107	0.118	0.112	0.244	0.108	0.341	0.101	0.218	0.144	0.223	0.371	0.148	0.1
301.965	0.616	0.248	0.156	0.364	0.493	0.183	0.417	0.31	0.212	0.352	0.252	0.09	0.166	0.104	0.119	0.226	0.101	0.096	0.092	0.227	0.116	0.113	0.086	0.108	0.089	0.097	0.099	0.104	0.176	0.148	0.109	0.111	0.175	0.144	0.105	0.101	0.105	0.11	0.11	0.245	0.111	0.357	0.102	0.223	0.133	0.236	0.392	0.149	0.099
302.733	0.59	0.252	0.163	0.351	0.487	0.19	0.417	0.315	0.219	0.353	0.25	0.096	0.169	0.103	0.118	0.229	0.106	0.094	0.092	0.234	0.119	0.109	0.078	0.108	0.09	0.098	0.1	0.104	0.172	0.148	0.108	0.108	0.172	0.144	0.108	0.101	0.108	0.119	0.115	0.244	0.112	0.347	0.103	0.226	0.154	0.229	0.405	0.15	0.101
303.55	0.588	0.253	0.163	0.355	0.502	0.181	0.431	0.314	0.234	0.353	0.251	0.092	0.164	0.102	0.121	0.235	0.102	0.095	0.093	0.244	0.125	0.114	0.08	0.109	0.094	0.1	0.101	0.102	0.175	0.154	0.107	0.11	0.176	0.142	0.106	0.103	0.101	0.115	0.114	0.253	0.114	0.335	0.1	0.228	0.137	0.232	0.411	0.153	0.1
304.347	0.532	0.243	0.154	0.333	0.484	0.178	0.387	0.292	0.231	0.341	0.246	0.094	0.164	0.109	0.123	0.237	0.107	0.099	0.094	0.248	0.12	0.114	0.078	0.111	0.095	0.1	0.103	0.105	0.177	0.146	0.11	0.112	0.171	0.145	0.106	0.1	0.107	0.114	0.111	0.257	0.113	0.332	0.102	0.234	0.146	0.244	0.402	0.153	0.103
305.165	0.597	0.262	0.164	0.355	0.516	0.191	0.439	0.306	0.252	0.358	0.258	0.093	0.169	0.102	0.116	0.227	0.107	0.09	0.098	0.25	0.12	0.116	0.083	0.107	0.093	0.102	0.099	0.105	0.173	0.15	0.109	0.109	0.179	0.145	0.108	0.105	0.104	0.112	0.114	0.245	0.108	0.34	0.102	0.229	0.14	0.235	0.386	0.15	0.099
305.922	0.554	0.258	0.168	0.363	0.588	0.192	0.429	0.314	0.262	0.356	0.26	0.097	0.169	0.106	0.121	0.231	0.108	0.093	0.099	0.259	0.13	0.119	0.081	0.11	0.093	0.1	0.099	0.107	0.179	0.151	0.107	0.111	0.182	0.147	0.111	0.101	0.107	0.121	0.117	0.264	0.11	0.347	0.102	0.236	0.142	0.254	0.369	0.152	0.103
306.668	0.546	0.242	0.152	0.336	0.5	0.178	0.417	0.298	0.253	0.335	0.243	0.095	0.165	0.103	0.118	0.239	0.106	0.096	0.096	0.264	0.13	0.118	0.079	0.11	0.095	0.101	0.099	0.105	0.172	0.154	0.11	0.109	0.179	0.147	0.109	0.107	0.105	0.114	0.116	0.25	0.115	0.332	0.102	0.23	0.141	0.244	0.38	0.15	0.101
307.42	0.558	0.267	0.166	0.368	0.545	0.194	0.441	0.328	0.28	0.366	0.259	0.092	0.172	0.102	0.125	0.226	0.105	0.097	0.094	0.27	0.131	0.12	0.088	0.109	0.093	0.101	0.099	0.108	0.174	0.153	0.106	0.11	0.178	0.151	0.108	0.104	0.104	0.113	0.121	0.255	0.112	0.329	0.102	0.233	0.148	0.248	0.383	0.154	0.103
308.171	0.565	0.262	0.165	0.368	0.536	0.196	0.439	0.325	0.286	0.347	0.258	0.094	0.167	0.105	0.125	0.239	0.106	0.095	0.092	0.276	0.129	0.128	0.085	0.111	0.094	0.099	0.098	0.106	0.176	0.141	0.114	0.112	0.175	0.149	0.106	0.107	0.104	0.113	0.113	0.256	0.111	0.342	0.104	0.235	0.147	0.257	0.396	0.152	0.1
308.955	0.587	0.275	0.17	0.368	0.568	0.188	0.435	0.342	0.3	0.356	0.262	0.095	0.171	0.107	0.12	0.237	0.11	0.094	0.095	0.28	0.135	0.129	0.079	0.11	0.099	0.101	0.102	0.104	0.179	0.156	0.106	0.113	0.175	0.154	0.111	0.11	0.103	0.116	0.116	0.256	0.114	0.348	0.1	0.237	0.148	0.259	0.42	0.153	0.102
309.69	0.551	0.272	0.172	0.342	0.478	0.197	0.434	0.328	0.299	0.354	0.258	0.095	0.169	0.105	0.126	0.24	0.11	0.097	0.1	0.285	0.132	0.128	0.082	0.109	0.097	0.103	0.102	0.108	0.178	0.155	0.112	0.115	0.177	0.152	0.112	0.11	0.106	0.115	0.116	0.253	0.115	0.353	0.099	0.242	0.139	0.265	0.403	0.15	0.105
310.457	0.579	0.279	0.171	0.36	0.535	0.195	0.44	0.335	0.306	0.368	0.269	0.095	0.17	0.107	0.125	0.239	0.111	0.093	0.099	0.293	0.133	0.129	0.084	0.113	0.103	0.102	0.102	0.105	0.178	0.151	0.111	0.115	0.175	0.154	0.114	0.11	0.111	0.12	0.118	0.267	0.115	0.357	0.102	0.24	0.142	0.263	0.401	0.15	0.106
311.209	0.574	0.286	0.171	0.368	0.57	0.197	0.443	0.344	0.309	0.365	0.269	0.095	0.174	0.106	0.126	0.239	0.109	0.098	0.1	0.297	0.138	0.13	0.088	0.113	0.101	0.101	0.102	0.107	0.181	0.153	0.109	0.115	0.176	0.153	0.109	0.109	0.11	0.114	0.115	0.261	0.115	0.357	0.104	0.243	0.148	0.27	0.418	0.153	0.108
311.96	0.603	0.288	0.174	0.374	0.544	0.2	0.45	0.328	0.317	0.361	0.272	0.094	0.181	0.106	0.127	0.24	0.105	0.095	0.097	0.296	0.139	0.135	0.091	0.112	0.1	0.102	0.103	0.105	0.18	0.146	0.109	0.116	0.174	0.156	0.112	0.108	0.11	0.114	0.115	0.264	0.113	0.335	0.103	0.249	0.142	0.277	0.42	0.156	0.105
312.727	0.577	0.287	0.18	0.377	0.562	0.202	0.448	0.353	0.323	0.371	0.272	0.094	0.176	0.107	0.126	0.249	0.108	0.098	0.096	0.296	0.138	0.137	0.086	0.114	0.103	0.1	0.103	0.104	0.177	0.148	0.112	0.114	0.177	0.158	0.115	0.111	0.108	0.118	0.119	0.269	0.114	0.34	0.102	0.249	0.148	0.284	0.42	0.155	0.103
313.462	0.546	0.29	0.174	0.372	0.521	0.209	0.444	0.36	0.319	0.362	0.281	0.095	0.18	0.103	0.128	0.244	0.109	0.099	0.102	0.297	0.14	0.138	0.089	0.11	0.101	0.102	0.103	0.108	0.18	0.153	0.114	0.118	0.182	0.162	0.115	0.113	0.114	0.121	0.118	0.268	0.12	0.337	0.101	0.247	0.138	0.28	0.408	0.156	0.108
314.231	0.543	0.268	0.171	0.368	0.517	0.181	0.42	0.332	0.316	0.353	0.273	0.094	0.183	0.108	0.127	0.241	0.108	0.094	0.097	0.3	0.141	0.14	0.083	0.112	0.102	0.105	0.103	0.108	0.181	0.158	0.108	0.115	0.172	0.154	0.113	0.116	0.113	0.121	0.118	0.275	0.116	0.351	0.103	0.255	0.146	0.286	0.405	0.155	0.107
314.967	0.549	0.294	0.184	0.385	0.524	0.203	0.449	0.342	0.34	0.368	0.284	0.097	0.182	0.107	0.124	0.245	0.107	0.092	0.098	0.3	0.142	0.144	0.084	0.116	0.104	0.103	0.104	0.107	0.177	0.156	0.105	0.116	0.175	0.158	0.112	0.112	0.11	0.121	0.122	0.257	0.115	0.326	0.102	0.244	0.157	0.292	0.391	0.153	0.102
315.797	0.52	0.276	0.172	0.338	0.488	0.184	0.443	0.329	0.32	0.352	0.26	0.1	0.189	0.107	0.13	0.247	0.113	0.099	0.099	0.301	0.149	0.148	0.093	0.116	0.104	0.104	0.107	0.109	0.182	0.161	0.106	0.119	0.177	0.164	0.114	0.117	0.115	0.122	0.122	0.289	0.12	0.362	0.102	0.245	0.146	0.301	0.427	0.156	0.107
316.582	0.522	0.3	0.188	0.374	0.518	0.219	0.463	0.359	0.348	0.372	0.28	0.097	0.187	0.108	0.13	0.25	0.109	0.101	0.101	0.306	0.146	0.142	0.092	0.114	0.104	0.102	0.104	0.109	0.178	0.162	0.106	0.117	0.174	0.16	0.114	0.116	0.111	0.122	0.121	0.28	0.119	0.378	0.1	0.256	0.153	0.305	0.382	0.153	0.111
317.382	0.518	0.281	0.175	0.363	0.458	0.209	0.432	0.326	0.321	0.347	0.261	0.097	0.189	0.109	0.127	0.249	0.111	0.101	0.1	0.3	0.147	0.152	0.088	0.115	0.104	0.102	0.103	0.108	0.178	0.16	0.104	0.115	0.174	0.162	0.117	0.122	0.111	0.122	0.12	0.285	0.121	0.368	0.101	0.262	0.15	0.299	0.407	0.156	0.111
318.13	0.528	0.296	0.191	0.373	0.539	0.219	0.466	0.369	0.347	0.366	0.284	0.097	0.193	0.11	0.126	0.253	0.113	0.101	0.1	0.302	0.155	0.155	0.087	0.115	0.104	0.102	0.106	0.108	0.178	0.165	0.106	0.119	0.174	0.167	0.125	0.119	0.109	0.124	0.12	0.279	0.122	0.364	0.101	0.262	0.157	0.309	0.41	0.155	0.108
318.931	0.559	0.293	0.194	0.367	0.547	0.218	0.454	0.364	0.35	0.37	0.286	0.096	0.191	0.106	0.13	0.256	0.11	0.101	0.1	0.304	0.152	0.156	0.093	0.117	0.106	0.104	0.104	0.106	0.182	0.158	0.105	0.122	0.176	0.165	0.119	0.117	0.111	0.123	0.125	0.267	0.12	0.362	0.102	0.269	0.154	0.314	0.433	0.154	0.105
319.667	0.554	0.297	0.191	0.376	0.525	0.229	0.481	0.356	0.355	0.37	0.284	0.097	0.203	0.109	0.131	0.258	0.11	0.099	0.098	0.305	0.159	0.154	0.089	0.118	0.11	0.103	0.105	0.108	0.183	0.16	0.111	0.123	0.172	0.166	0.124	0.118	0.111	0.122	0.12	0.257	0.121	0.376	0.101	0.278	0.151	0.322	0.42	0.157	0.109
320.419	0.536	0.283	0.184	0.349	0.505	0.212	0.442	0.339	0.35	0.361	0.274	0.093	0.205	0.106	0.13	0.251	0.11	0.097	0.099	0.305	0.158	0.157	0.096	0.116	0.109	0.102	0.106	0.108	0.179	0.162	0.109	0.118	0.173	0.166	0.117	0.123	0.112	0.117	0.122	0.288	0.122	0.374	0.099	0.268	0.152	0.315	0.43	0.157	0.107
321.17	0.512	0.28	0.185	0.363	0.492	0.219	0.435	0.333	0.348	0.344	0.28	0.095	0.207	0.108	0.125	0.249	0.108	0.099	0.098	0.302	0.161	0.159	0.09	0.121	0.106	0.103	0.107	0.108	0.178	0.166	0.109	0.12	0.171	0.166	0.121	0.118	0.111	0.121	0.123	0.272	0.123	0.354	0.101	0.263	0.147	0.31	0.415	0.155	0.109
321.89	0.559	0.297	0.207	0.401	0.543	0.228	0.45	0.4	0.36	0.385	0.299	0.095	0.211	0.106	0.125	0.241	0.11	0.093	0.101	0.305	0.168	0.158	0.091	0.119	0.11	0.102	0.108	0.106	0.179	0.164	0.106	0.12	0.169	0.164	0.121	0.119	0.114	0.122	0.124	0.268	0.121	0.382	0.103	0.268	0.153	0.323	0.41	0.155	0.11
322.642	0.542	0.306	0.2	0.399	0.529	0.246	0.469	0.386	0.379	0.377	0.297	0.1	0.21	0.108	0.132	0.25	0.114	0.1	0.104	0.308	0.17	0.16	0.089	0.119	0.11	0.103	0.108	0.109	0.184	0.16	0.109	0.118	0.171	0.168	0.123	0.121	0.116	0.122	0.123	0.278	0.13	0.385	0.104	0.273	0.155	0.332	0.439	0.158	0.112
323.378	0.542	0.301	0.209	0.393	0.553	0.234	0.476	0.365	0.378	0.374	0.297	0.098	0.216	0.113	0.125	0.242	0.113	0.095	0.102	0.302	0.166	0.162	0.086	0.115	0.113	0.103	0.106	0.106	0.176	0.161	0.106	0.118	0.166	0.171	0.122	0.12	0.117	0.125	0.124	0.295	0.124	0.368	0.101	0.273	0.169	0.329	0.398	0.157	0.109
324.145	0.515	0.297	0.196	0.363	0.51	0.229	0.452	0.362	0.346	0.358	0.286	0.096	0.225	0.11	0.13	0.242	0.114	0.097	0.102	0.308	0.175	0.162	0.089	0.118	0.113	0.102	0.106	0.107	0.182	0.164	0.109	0.122	0.168	0.175	0.126	0.122	0.12	0.127	0.128	0.291	0.129	0.388	0.108	0.284	0.138	0.352	0.418	0.168	0.112
324.912	0.563	0.308	0.213	0.391	0.504	0.249	0.491	0.366	0.367	0.371	0.311	0.098	0.216	0.11	0.13	0.239	0.111	0.104	0.105	0.312	0.178	0.163	0.089	0.118	0.113	0.105	0.11	0.108	0.179	0.161	0.108	0.123	0.169	0.169	0.122	0.121	0.114	0.119	0.118	0.284	0.128	0.367	0.103	0.275	0.162	0.333	0.412	0.161	0.113
325.636	0.538	0.308	0.213	0.388	0.572	0.248	0.49	0.389	0.376	0.375	0.311	0.1	0.229	0.114	0.138	0.241	0.117	0.104	0.105	0.318	0.181	0.167	0.086	0.117	0.121	0.104	0.108	0.109	0.182	0.174	0.111	0.121	0.176	0.173	0.122	0.121	0.118	0.126	0.124	0.306	0.129	0.404	0.103	0.3	0.159	0.35	0.391	0.162	0.114
326.383	0.549	0.319	0.22	0.404	0.534	0.269	0.485	0.408	0.38	0.384	0.324	0.099	0.228	0.111	0.133	0.235	0.111	0.099	0.102	0.318	0.182	0.163	0.088	0.117	0.115	0.108	0.109	0.107	0.181	0.177	0.108	0.122	0.171	0.173	0.124	0.121	0.115	0.123	0.127	0.291	0.129	0.369	0.103	0.292	0.161	0.344	0.399	0.161	0.109
327.135	0.508	0.296	0.209	0.376	0.483	0.245	0.44	0.352	0.37	0.36	0.291	0.094	0.229	0.111	0.135	0.232	0.114	0.1	0.105	0.316	0.187	0.169	0.085	0.119	0.118	0.105	0.109	0.108	0.18	0.162	0.11	0.124	0.167	0.171	0.119	0.125	0.111	0.12	0.122	0.279	0.13	0.377	0.1	0.29	0.163	0.359	0.375	0.162	0.112
327.902	0.555	0.322	0.23	0.394	0.586	0.262	0.484	0.388	0.381	0.385	0.314	0.099	0.229	0.113	0.138	0.228	0.112	0.098	0.104	0.319	0.189	0.173	0.089	0.118	0.116	0.106	0.11	0.107	0.18	0.166	0.108	0.121	0.167	0.171	0.127	0.124	0.114	0.126	0.123	0.287	0.13	0.377	0.103	0.306	0.154	0.359	0.402	0.165	0.111
328.691	0.559	0.332	0.225	0.411	0.603	0.274	0.466	0.4	0.397	0.389	0.325	0.099	0.232	0.111	0.14	0.235	0.115	0.099	0.102	0.328	0.193	0.177	0.093	0.121	0.122	0.107	0.112	0.106	0.174	0.17	0.108	0.122	0.168	0.171	0.126	0.123	0.115	0.121	0.122	0.289	0.131	0.37	0.104	0.301	0.163	0.348	0.389	0.165	0.109
329.435	0.531	0.314	0.219	0.374	0.503	0.256	0.444	0.38	0.37	0.361	0.299	0.094	0.236	0.107	0.137	0.227	0.115	0.104	0.105	0.329	0.189	0.175	0.087	0.12	0.121	0.107	0.112	0.108	0.18	0.168	0.11	0.123	0.164	0.167	0.124	0.127	0.114	0.128	0.125	0.286	0.129	0.387	0.105	0.301	0.156	0.368	0.396	0.167	0.113
330.188	0.53	0.316	0.233	0.384	0.519	0.265	0.453	0.384	0.379	0.361	0.307	0.099	0.227	0.109	0.132	0.223	0.115	0.096	0.105	0.33	0.207	0.179	0.086	0.119	0.122	0.106	0.111	0.108	0.185	0.18	0.106	0.12	0.168	0.17	0.13	0.126	0.119	0.124	0.128	0.299	0.136	0.422	0.105	0.312	0.168	0.365	0.393	0.167	0.109
330.938	0.523	0.331	0.245	0.417	0.556	0.292	0.496	0.402	0.407	0.403	0.335	0.1	0.24	0.109	0.134	0.223	0.11	0.097	0.103	0.33	0.2	0.18	0.086	0.118	0.119	0.107	0.111	0.108	0.176	0.167	0.108	0.12	0.164	0.171	0.127	0.126	0.12	0.127	0.13	0.292	0.137	0.399	0.106	0.306	0.158	0.37	0.411	0.17	0.114
331.691	0.544	0.336	0.248	0.425	0.556	0.285	0.486	0.42	0.404	0.392	0.33	0.099	0.239	0.11	0.134	0.22	0.115	0.097	0.107	0.327	0.202	0.18	0.088	0.122	0.12	0.109	0.112	0.107	0.178	0.174	0.108	0.12	0.166	0.168	0.123	0.126	0.119	0.132	0.126	0.29	0.132	0.366	0.102	0.312	0.155	0.388	0.405	0.165	0.114
332.443	0.535	0.341	0.252	0.414	0.571	0.298	0.508	0.433	0.414	0.381	0.328	0.108	0.253	0.125	0.153	0.238	0.123	0.111	0.114	0.341	0.223	0.194	0.098	0.128	0.136	0.116	0.122	0.117	0.195	0.183	0.117	0.135	0.174	0.184	0.139	0.135	0.13	0.133	0.138	0.31	0.145	0.407	0.112	0.333	0.186	0.402	0.428	0.181	0.121
333.21	0.545	0.345	0.25	0.401	0.573	0.289	0.496	0.418	0.407	0.395	0.336	0.1	0.239	0.112	0.139	0.214	0.111	0.1	0.105	0.327	0.214	0.183	0.087	0.121	0.126	0.108	0.112	0.109	0.182	0.173	0.109	0.122	0.165	0.17	0.126	0.128	0.115	0.127	0.13	0.292	0.137	0.405	0.105	0.299	0.164	0.375	0.405	0.172	0.106
333.976	0.508	0.329	0.236	0.379	0.556	0.278	0.451	0.371	0.386	0.365	0.318	0.101	0.249	0.113	0.142	0.213	0.118	0.1	0.104	0.332	0.219	0.185	0.084	0.121	0.127	0.111	0.114	0.11	0.188	0.174	0.106	0.126	0.163	0.173	0.13	0.129	0.119	0.123	0.128	0.286	0.135	0.395	0.102	0.321	0.172	0.383	0.377	0.172	0.112
334.729	0.546	0.333	0.258	0.44	0.579	0.294	0.48	0.433	0.401	0.401	0.334	0.104	0.247	0.109	0.138	0.206	0.111	0.096	0.107	0.332	0.212	0.184	0.08	0.123	0.126	0.109	0.113	0.11	0.183	0.171	0.104	0.124	0.16	0.171	0.125	0.126	0.119	0.126	0.137	0.304	0.141	0.392	0.104	0.313	0.177	0.396	0.412	0.174	0.11
335.481	0.554	0.346	0.278	0.433	0.554	0.309	0.494	0.427	0.397	0.399	0.338	0.098	0.251	0.112	0.146	0.212	0.115	0.096	0.106	0.327	0.221	0.189	0.089	0.123	0.133	0.109	0.113	0.112	0.181	0.184	0.107	0.121	0.164	0.172	0.124	0.128	0.118	0.121	0.131	0.289	0.135	0.381	0.104	0.315	0.167	0.394	0.415	0.175	0.106
336.232	0.545	0.354	0.277	0.425	0.539	0.309	0.487	0.429	0.408	0.407	0.337	0.1	0.257	0.114	0.141	0.206	0.112	0.105	0.108	0.33	0.23	0.192	0.094	0.125	0.132	0.11	0.117	0.111	0.184	0.181	0.109	0.128	0.162	0.173	0.129	0.131	0.122	0.128	0.13	0.293	0.14	0.385	0.104	0.312	0.176	0.392	0.404	0.174	0.11
337.049	0.536	0.335	0.261	0.368	0.494	0.293	0.458	0.398	0.389	0.373	0.314	0.099	0.254	0.11	0.139	0.207	0.112	0.098	0.104	0.333	0.233	0.191	0.093	0.125	0.133	0.111	0.114	0.11	0.19	0.184	0.108	0.124	0.161	0.173	0.128	0.131	0.123	0.127	0.131	0.286	0.137	0.404	0.107	0.321	0.177	0.396	0.389	0.179	0.108
337.797	0.561	0.348	0.285	0.428	0.584	0.321	0.502	0.414	0.413	0.402	0.343	0.096	0.261	0.109	0.141	0.206	0.113	0.098	0.104	0.33	0.233	0.194	0.088	0.125	0.133	0.112	0.116	0.111	0.186	0.188	0.107	0.126	0.157	0.174	0.119	0.13	0.118	0.124	0.13	0.287	0.138	0.397	0.106	0.327	0.172	0.389	0.358	0.181	0.109
338.551	0.505	0.337	0.274	0.413	0.5	0.305	0.465	0.402	0.396	0.379	0.318	0.098	0.25	0.112	0.14	0.204	0.116	0.1	0.106	0.329	0.229	0.194	0.087	0.124	0.134	0.112	0.116	0.112	0.187	0.184	0.107	0.126	0.162	0.179	0.124	0.133	0.125	0.126	0.129	0.282	0.142	0.387	0.105	0.328	0.176	0.389	0.4	0.179	0.107
339.303	0.551	0.358	0.308	0.435	0.575	0.315	0.491	0.449	0.419	0.403	0.344	0.1	0.265	0.113	0.135	0.196	0.111	0.1	0.102	0.339	0.231	0.202	0.086	0.126	0.136	0.112	0.114	0.111	0.183	0.182	0.109	0.126	0.159	0.177	0.127	0.129	0.122	0.126	0.132	0.299	0.136	0.41	0.102	0.312	0.174	0.401	0.388	0.18	0.108
340.102	0.519	0.338	0.289	0.405	0.575	0.3	0.465	0.424	0.389	0.374	0.321	0.098	0.258	0.113	0.136	0.192	0.109	0.103	0.103	0.337	0.231	0.208	0.093	0.128	0.136	0.112	0.118	0.111	0.186	0.187	0.107	0.124	0.159	0.179	0.128	0.134	0.121	0.13	0.128	0.325	0.138	0.404	0.105	0.321	0.161	0.396	0.38	0.183	0.105
340.886	0.548	0.354	0.303	0.426	0.549	0.325	0.478	0.44	0.428	0.412	0.35	0.101	0.261	0.113	0.144	0.195	0.115	0.101	0.107	0.341	0.225	0.205	0.096	0.127	0.138	0.112	0.118	0.112	0.195	0.191	0.111	0.126	0.158	0.182	0.127	0.134	0.124	0.12	0.128	0.274	0.143	0.415	0.102	0.322	0.182	0.399	0.376	0.18	0.108
341.637	0.533	0.357	0.302	0.414	0.511	0.313	0.483	0.441	0.425	0.401	0.332	0.096	0.276	0.113	0.139	0.188	0.112	0.101	0.102	0.347	0.23	0.207	0.088	0.126	0.139	0.115	0.117	0.112	0.188	0.18	0.11	0.126	0.163	0.186	0.129	0.135	0.122	0.129	0.131	0.308	0.135	0.437	0.107	0.322	0.175	0.403	0.386	0.185	0.11
342.406	0.518	0.359	0.305	0.423	0.573	0.324	0.498	0.427	0.41	0.393	0.35	0.1	0.266	0.11	0.138	0.187	0.117	0.097	0.107	0.347	0.241	0.21	0.091	0.127	0.137	0.113	0.117	0.114	0.192	0.183	0.109	0.123	0.157	0.182	0.126	0.139	0.118	0.122	0.131	0.283	0.139	0.422	0.107	0.324	0.172	0.396	0.408	0.18	0.104
343.173	0.517	0.362	0.305	0.399	0.561	0.347	0.48	0.43	0.43	0.396	0.35	0.097	0.266	0.113	0.143	0.187	0.111	0.094	0.102	0.351	0.24	0.211	0.092	0.128	0.14	0.113	0.119	0.111	0.194	0.193	0.105	0.124	0.164	0.192	0.128	0.135	0.119	0.123	0.129	0.284	0.141	0.404	0.105	0.326	0.167	0.409	0.396	0.183	0.107
343.937	0.527	0.355	0.305	0.396	0.546	0.319	0.489	0.42	0.421	0.393	0.338	0.101	0.272	0.111	0.146	0.187	0.118	0.098	0.108	0.354	0.232	0.214	0.094	0.129	0.139	0.114	0.118	0.113	0.188	0.192	0.109	0.124	0.161	0.192	0.127	0.131	0.123	0.123	0.13	0.302	0.138	0.405	0.107	0.332	0.167	0.413	0.4	0.184	0.107
344.689	0.542	0.376	0.31	0.431	0.586	0.34	0.509	0.453	0.432	0.41	0.363	0.101	0.274	0.11	0.145	0.183	0.113	0.104	0.103	0.353	0.229	0.211	0.093	0.131	0.14	0.115	0.118	0.111	0.19	0.187	0.108	0.125	0.159	0.188	0.125	0.133	0.116	0.122	0.127	0.282	0.141	0.4	0.106	0.34	0.18	0.398	0.389	0.187	0.106
345.459	0.56	0.38	0.319	0.405	0.562	0.356	0.489	0.471	0.461	0.396	0.356	0.103	0.275	0.113	0.143	0.18	0.115	0.101	0.108	0.357	0.228	0.213	0.086	0.129	0.141	0.116	0.117	0.112	0.192	0.195	0.104	0.126	0.164	0.193	0.126	0.133	0.122	0.126	0.13	0.296	0.145	0.392	0.104	0.32	0.165	0.4	0.374	0.185	0.107
346.306	0.559	0.391	0.328	0.43	0.57	0.348	0.505	0.473	0.443	0.41	0.353	0.1	0.272	0.112	0.143	0.181	0.117	0.101	0.108	0.358	0.234	0.219	0.09	0.128	0.142	0.117	0.118	0.112	0.194	0.188	0.107	0.126	0.162	0.194	0.127	0.137	0.12	0.127	0.134	0.289	0.143	0.399	0.105	0.324	0.177	0.429	0.374	0.187	0.107
347.105	0.484	0.341	0.298	0.403	0.52	0.325	0.452	0.424	0.407	0.373	0.324	0.097	0.274	0.113	0.141	0.186	0.114	0.102	0.107	0.363	0.243	0.223	0.094	0.132	0.138	0.117	0.117	0.111	0.188	0.194	0.109	0.126	0.163	0.196	0.125	0.133	0.119	0.125	0.132	0.295	0.144	0.411	0.104	0.34	0.17	0.401	0.372	0.19	0.112
347.841	0.521	0.377	0.32	0.437	0.559	0.367	0.476	0.453	0.442	0.392	0.358	0.097	0.272	0.112	0.143	0.184	0.118	0.104	0.112	0.358	0.235	0.223	0.098	0.129	0.138	0.116	0.116	0.111	0.19	0.188	0.108	0.123	0.165	0.202	0.123	0.137	0.117	0.127	0.135	0.316	0.144	0.423	0.104	0.33	0.175	0.4	0.38	0.189	0.109
348.657	0.526	0.369	0.303	0.413	0.516	0.34	0.472	0.432	0.427	0.398	0.345	0.099	0.274	0.115	0.145	0.182	0.117	0.102	0.109	0.36	0.247	0.221	0.095	0.132	0.137	0.118	0.117	0.111	0.183	0.191	0.109	0.125	0.164	0.201	0.127	0.136	0.123	0.126	0.132	0.313	0.146	0.419	0.105	0.319	0.176	0.419	0.397	0.188	0.108
349.393	0.502	0.366	0.302	0.389	0.515	0.315	0.458	0.4	0.401	0.37	0.332	0.098	0.275	0.11	0.144	0.187	0.117	0.102	0.112	0.364	0.234	0.224	0.094	0.132	0.144	0.117	0.12	0.113	0.189	0.19	0.107	0.125	0.166	0.207	0.127	0.138	0.122	0.126	0.134	0.303	0.15	0.452	0.106	0.337	0.154	0.41	0.411	0.194	0.109
350.194	0.514	0.374	0.302	0.409	0.499	0.336	0.454	0.434	0.436	0.389	0.346	0.098	0.288	0.112	0.139	0.184	0.118	0.103	0.112	0.363	0.244	0.226	0.098	0.136	0.138	0.118	0.122	0.11	0.19	0.188	0.111	0.125	0.163	0.205	0.129	0.133	0.126	0.128	0.136	0.312	0.15	0.439	0.105	0.338	0.168	0.421	0.398	0.191	0.109
350.959	0.517	0.39	0.324	0.432	0.519	0.365	0.49	0.447	0.428	0.39	0.349	0.098	0.278	0.113	0.144	0.186	0.115	0.099	0.109	0.364	0.241	0.223	0.095	0.134	0.145	0.116	0.119	0.112	0.189	0.197	0.11	0.126	0.162	0.21	0.125	0.142	0.123	0.134	0.134	0.293	0.152	0.432	0.104	0.341	0.16	0.408	0.397	0.193	0.104
351.711	0.543	0.403	0.332	0.435	0.584	0.366	0.497	0.45	0.434	0.416	0.348	0.099	0.285	0.113	0.148	0.187	0.12	0.104	0.112	0.365	0.237	0.229	0.099	0.136	0.146	0.118	0.12	0.112	0.19	0.198	0.105	0.127	0.166	0.212	0.13	0.143	0.12	0.131	0.135	0.298	0.152	0.413	0.104	0.328	0.169	0.425	0.389	0.192	0.111
352.45	0.519	0.386	0.318	0.441	0.544	0.359	0.471	0.458	0.432	0.388	0.365	0.102	0.281	0.114	0.148	0.19	0.121	0.104	0.117	0.376	0.226	0.231	0.095	0.136	0.141	0.119	0.122	0.11	0.192	0.198	0.105	0.126	0.165	0.214	0.126	0.136	0.124	0.133	0.134	0.302	0.149	0.414	0.108	0.332	0.162	0.411	0.399	0.19	0.109
353.168	0.488	0.364	0.29	0.412	0.463	0.334	0.441	0.426	0.408	0.38	0.319	0.097	0.283	0.112	0.148	0.19	0.115	0.105	0.115	0.373	0.228	0.237	0.097	0.136	0.138	0.119	0.12	0.112	0.188	0.197	0.11	0.126	0.166	0.218	0.131	0.141	0.12	0.129	0.133	0.299	0.151	0.427	0.107	0.32	0.16	0.405	0.368	0.196	0.109
353.916	0.452	0.382	0.306	0.421	0.458	0.321	0.469	0.406	0.395	0.382	0.315	0.098	0.288	0.113	0.149	0.19	0.119	0.103	0.111	0.375	0.229	0.23	0.096	0.139	0.146	0.116	0.124	0.11	0.188	0.202	0.108	0.126	0.167	0.215	0.128	0.142	0.126	0.128	0.135	0.293	0.15	0.441	0.107	0.331	0.162	0.419	0.373	0.197	0.106
354.668	0.477	0.368	0.302	0.426	0.495	0.349	0.45	0.438	0.403	0.381	0.334	0.099	0.289	0.111	0.149	0.192	0.118	0.101	0.112	0.373	0.227	0.228	0.098	0.137	0.146	0.117	0.125	0.112	0.189	0.193	0.107	0.127	0.166	0.213	0.126	0.141	0.121	0.125	0.134	0.284	0.156	0.422	0.106	0.313	0.175	0.388	0.367	0.193	0.111
355.436	0.488	0.394	0.333	0.459	0.551	0.37	0.484	0.448	0.423	0.403	0.343	0.103	0.289	0.115	0.155	0.202	0.118	0.105	0.112	0.385	0.229	0.232	0.098	0.139	0.144	0.117	0.124	0.11	0.187	0.195	0.108	0.127	0.17	0.222	0.13	0.145	0.122	0.129	0.132	0.304	0.154	0.446	0.103	0.336	0.171	0.408	0.408	0.192	0.107
356.176	0.53	0.395	0.325	0.445	0.537	0.367	0.486	0.46	0.429	0.401	0.332	0.098	0.282	0.113	0.148	0.196	0.123	0.103	0.114	0.383	0.227	0.242	0.103	0.138	0.142	0.116	0.124	0.112	0.188	0.198	0.109	0.128	0.168	0.219	0.123	0.145	0.12	0.131	0.132	0.281	0.153	0.423	0.108	0.315	0.153	0.396	0.404	0.193	0.106
356.922	0.49	0.397	0.309	0.413	0.477	0.323	0.467	0.413	0.4	0.38	0.326	0.099	0.294	0.114	0.145	0.19	0.121	0.101	0.11	0.386	0.229	0.236	0.095	0.137	0.146	0.117	0.124	0.109	0.185	0.199	0.107	0.13	0.169	0.226	0.13	0.148	0.128	0.136	0.14	0.294	0.159	0.443	0.106	0.339	0.178	0.407	0.416	0.196	0.11
357.675	0.499	0.401	0.326	0.431	0.514	0.358	0.506	0.465	0.429	0.41	0.357	0.1	0.301	0.115	0.161	0.202	0.12	0.107	0.113	0.396	0.244	0.238	0.106	0.139	0.148	0.117	0.125	0.111	0.193	0.186	0.107	0.13	0.164	0.221	0.132	0.148	0.126	0.132	0.135	0.301	0.151	0.435	0.105	0.344	0.168	0.414	0.399	0.197	0.109
358.442	0.499	0.404	0.336	0.433	0.526	0.384	0.495	0.428	0.442	0.395	0.353	0.102	0.297	0.118	0.153	0.2	0.121	0.106	0.112	0.392	0.242	0.24	0.102	0.14	0.148	0.117	0.126	0.111	0.19	0.194	0.108	0.13	0.17	0.226	0.131	0.148	0.124	0.131	0.136	0.311	0.155	0.462	0.106	0.333	0.178	0.429	0.401	0.195	0.107
359.209	0.486	0.384	0.305	0.395	0.463	0.314	0.441	0.427	0.413	0.388	0.326	0.104	0.294	0.111	0.15	0.2	0.122	0.112	0.115	0.386	0.238	0.238	0.102	0.137	0.144	0.115	0.125	0.112	0.184	0.188	0.108	0.131	0.168	0.222	0.126	0.145	0.124	0.129	0.134	0.288	0.154	0.428	0.107	0.323	0.169	0.384	0.387	0.196	0.106
359.945	0.488	0.392	0.31	0.423	0.509	0.357	0.483	0.437	0.406	0.386	0.327	0.104	0.301	0.117	0.159	0.203	0.121	0.112	0.116	0.395	0.257	0.238	0.104	0.138	0.148	0.118	0.127	0.11	0.189	0.194	0.106	0.132	0.173	0.229	0.133	0.152	0.127	0.132	0.14	0.331	0.156	0.45	0.109	0.33	0.169	0.407	0.406	0.202	0.11
360.681	0.507	0.405	0.335	0.426	0.559	0.351	0.51	0.459	0.426	0.411	0.365	0.102	0.305	0.112	0.153	0.204	0.124	0.108	0.116	0.398	0.252	0.239	0.109	0.142	0.151	0.117	0.13	0.112	0.196	0.197	0.112	0.131	0.173	0.225	0.13	0.146	0.129	0.136	0.134	0.311	0.159	0.456	0.104	0.325	0.18	0.398	0.368	0.198	0.107
361.432	0.49	0.4	0.311	0.407	0.483	0.344	0.449	0.432	0.406	0.384	0.325	0.105	0.308	0.112	0.16	0.2	0.123	0.112	0.112	0.399	0.26	0.238	0.099	0.135	0.145	0.116	0.127	0.111	0.187	0.188	0.106	0.13	0.173	0.226	0.132	0.152	0.128	0.13	0.137	0.3	0.157	0.44	0.103	0.323	0.174	0.391	0.378	0.194	0.111
362.173	0.525	0.422	0.34	0.418	0.542	0.36	0.476	0.479	0.429	0.406	0.338	0.103	0.308	0.114	0.154	0.199	0.123	0.116	0.115	0.396	0.248	0.248	0.105	0.139	0.149	0.118	0.124	0.109	0.19	0.189	0.112	0.131	0.168	0.236	0.132	0.153	0.122	0.13	0.138	0.322	0.16	0.488	0.11	0.334	0.19	0.41	0.389	0.203	0.109
362.966	0.555	0.434	0.339	0.442	0.552	0.368	0.487	0.453	0.415	0.4	0.345	0.102	0.303	0.117	0.157	0.202	0.129	0.116	0.114	0.408	0.25	0.237	0.102	0.139	0.158	0.116	0.131	0.109	0.189	0.195	0.111	0.135	0.17	0.227	0.131	0.152	0.13	0.131	0.14	0.293	0.156	0.443	0.106	0.328	0.157	0.417	0.394	0.199	0.111
363.718	0.536	0.417	0.348	0.442	0.527	0.371	0.508	0.433	0.441	0.416	0.341	0.104	0.31	0.114	0.158	0.195	0.118	0.115	0.11	0.407	0.249	0.241	0.103	0.142	0.154	0.115	0.131	0.111	0.189	0.188	0.11	0.133	0.172	0.231	0.134	0.156	0.132	0.13	0.138	0.298	0.165	0.448	0.106	0.336	0.181	0.413	0.415	0.199	0.111
364.453	0.534	0.397	0.329	0.413	0.484	0.367	0.429	0.416	0.397	0.39	0.317	0.102	0.31	0.121	0.16	0.198	0.122	0.116	0.113	0.42	0.26	0.248	0.109	0.142	0.153	0.118	0.136	0.111	0.192	0.2	0.114	0.138	0.176	0.236	0.14	0.158	0.136	0.136	0.14	0.295	0.165	0.51	0.109	0.343	0.193	0.429	0.396	0.203	0.112
365.222	0.53	0.43	0.358	0.457	0.552	0.393	0.46	0.444	0.442	0.42	0.349	0.101	0.307	0.118	0.162	0.198	0.121	0.12	0.114	0.409	0.262	0.24	0.104	0.139	0.154	0.117	0.135	0.11	0.189	0.185	0.111	0.135	0.176	0.232	0.138	0.153	0.133	0.134	0.135	0.286	0.162	0.472	0.108	0.337	0.184	0.401	0.391	0.197	0.112
365.971	0.549	0.422	0.352	0.453	0.55	0.375	0.489	0.469	0.438	0.406	0.356	0.101	0.307	0.116	0.166	0.197	0.125	0.127	0.117	0.41	0.259	0.236	0.106	0.142	0.151	0.119	0.135	0.115	0.189	0.197	0.112	0.134	0.175	0.235	0.137	0.157	0.13	0.124	0.135	0.286	0.161	0.456	0.106	0.336	0.173	0.406	0.385	0.197	0.11
366.726	0.537	0.414	0.357	0.451	0.574	0.393	0.491	0.463	0.44	0.407	0.362	0.102	0.312	0.118	0.165	0.197	0.125	0.119	0.115	0.414	0.258	0.235	0.101	0.144	0.161	0.116	0.136	0.11	0.186	0.189	0.118	0.134	0.18	0.234	0.138	0.156	0.127	0.134	0.135	0.276	0.163	0.451	0.109	0.34	0.153	0.413	0.378	0.199	0.108
367.491	0.545	0.426	0.355	0.445	0.528	0.374	0.487	0.475	0.436	0.411	0.35	0.101	0.317	0.115	0.167	0.197	0.121	0.121	0.113	0.417	0.259	0.24	0.108	0.143	0.158	0.118	0.136	0.111	0.19	0.202	0.119	0.136	0.176	0.234	0.14	0.159	0.13	0.128	0.139	0.3	0.163	0.46	0.107	0.339	0.167	0.396	0.407	0.197	0.111
368.309	0.526	0.421	0.356	0.458	0.509	0.384	0.487	0.467	0.424	0.411	0.339	0.102	0.309	0.118	0.166	0.191	0.125	0.123	0.118	0.419	0.264	0.241	0.1	0.143	0.16	0.116	0.137	0.114	0.191	0.193	0.116	0.138	0.181	0.235	0.14	0.16	0.13	0.127	0.135	0.303	0.169	0.461	0.111	0.342	0.178	0.408	0.363	0.204	0.11
369.057	0.499	0.395	0.329	0.416	0.493	0.356	0.446	0.425	0.396	0.389	0.317	0.102	0.319	0.113	0.172	0.194	0.124	0.127	0.114	0.423	0.271	0.243	0.098	0.142	0.163	0.12	0.138	0.112	0.186	0.19	0.118	0.137	0.183	0.237	0.144	0.156	0.133	0.13	0.136	0.278	0.17	0.443	0.108	0.333	0.182	0.402	0.382	0.199	0.115
369.888	0.469	0.395	0.342	0.41	0.457	0.333	0.472	0.446	0.407	0.389	0.326	0.106	0.311	0.114	0.165	0.19	0.12	0.121	0.114	0.428	0.259	0.237	0.107	0.146	0.159	0.12	0.137	0.111	0.186	0.194	0.122	0.137	0.185	0.243	0.143	0.153	0.137	0.128	0.135	0.31	0.168	0.433	0.11	0.328	0.176	0.409	0.381	0.203	0.11
370.643	0.544	0.436	0.355	0.446	0.491	0.383	0.517	0.492	0.431	0.416	0.354	0.103	0.324	0.119	0.17	0.197	0.129	0.123	0.12	0.43	0.27	0.242	0.108	0.145	0.165	0.119	0.14	0.112	0.188	0.193	0.123	0.136	0.19	0.238	0.15	0.159	0.136	0.129	0.132	0.281	0.175	0.443	0.113	0.324	0.169	0.416	0.372	0.201	0.112
371.394	0.501	0.404	0.333	0.378	0.495	0.365	0.463	0.435	0.416	0.391	0.323	0.103	0.312	0.12	0.179	0.194	0.128	0.126	0.118	0.438	0.278	0.25	0.105	0.145	0.165	0.119	0.142	0.113	0.192	0.19	0.124	0.14	0.193	0.242	0.148	0.163	0.129	0.13	0.131	0.309	0.171	0.447	0.111	0.339	0.174	0.402	0.406	0.209	0.112
372.146	0.534	0.429	0.355	0.46	0.542	0.369	0.499	0.481	0.434	0.425	0.347	0.103	0.309	0.116	0.176	0.188	0.123	0.124	0.117	0.436	0.267	0.241	0.109	0.144	0.162	0.118	0.138	0.111	0.188	0.193	0.12	0.14	0.193	0.245	0.151	0.159	0.131	0.133	0.134	0.295	0.173	0.455	0.109	0.354	0.161	0.415	0.39	0.203	0.107
372.912	0.545	0.428	0.358	0.435	0.524	0.393	0.486	0.443	0.432	0.423	0.345	0.104	0.312	0.118	0.169	0.193	0.12	0.118	0.119	0.429	0.279	0.236	0.104	0.144	0.161	0.117	0.134	0.111	0.186	0.183	0.12	0.133	0.189	0.244	0.149	0.161	0.138	0.136	0.14	0.307	0.172	0.457	0.113	0.341	0.192	0.415	0.355	0.201	0.108
373.664	0.537	0.436	0.348	0.445	0.566	0.376	0.494	0.454	0.427	0.421	0.346	0.103	0.315	0.116	0.173	0.191	0.126	0.121	0.118	0.443	0.278	0.244	0.104	0.149	0.166	0.119	0.142	0.111	0.186	0.199	0.121	0.135	0.193	0.244	0.151	0.165	0.133	0.13	0.137	0.301	0.177	0.466	0.108	0.351	0.173	0.408	0.382	0.205	0.11
374.432	0.484	0.409	0.332	0.422	0.517	0.361	0.463	0.449	0.401	0.402	0.337	0.099	0.313	0.114	0.174	0.192	0.125	0.116	0.123	0.436	0.267	0.238	0.105	0.144	0.162	0.118	0.136	0.113	0.189	0.19	0.121	0.136	0.196	0.246	0.155	0.162	0.137	0.127	0.133	0.29	0.171	0.474	0.108	0.326	0.171	0.425	0.362	0.204	0.106
375.277	0.487	0.411	0.338	0.399	0.482	0.36	0.468	0.469	0.403	0.388	0.323	0.1	0.313	0.122	0.181	0.203	0.123	0.125	0.12	0.446	0.291	0.236	0.111	0.145	0.161	0.121	0.139	0.11	0.193	0.191	0.127	0.139	0.202	0.253	0.154	0.162	0.135	0.122	0.138	0.287	0.173	0.467	0.112	0.344	0.158	0.424	0.393	0.206	0.108
376.046	0.501	0.426	0.343	0.403	0.462	0.35	0.459	0.44	0.399	0.39	0.326	0.103	0.316	0.116	0.17	0.2	0.126	0.123	0.127	0.451	0.294	0.248	0.106	0.147	0.172	0.12	0.141	0.113	0.19	0.187	0.122	0.138	0.21	0.259	0.156	0.166	0.138	0.129	0.139	0.278	0.177	0.487	0.11	0.337	0.186	0.433	0.378	0.215	0.109
376.942	0.502	0.414	0.348	0.422	0.506	0.335	0.463	0.477	0.402	0.4	0.334	0.1	0.32	0.118	0.18	0.192	0.129	0.118	0.123	0.447	0.282	0.242	0.113	0.148	0.16	0.118	0.139	0.113	0.192	0.189	0.126	0.14	0.213	0.251	0.162	0.165	0.137	0.128	0.139	0.298	0.176	0.463	0.109	0.328	0.176	0.437	0.385	0.21	0.108
377.693	0.513	0.409	0.328	0.395	0.486	0.348	0.459	0.444	0.424	0.396	0.325	0.104	0.307	0.114	0.186	0.203	0.124	0.13	0.126	0.452	0.29	0.248	0.109	0.149	0.163	0.119	0.141	0.112	0.192	0.199	0.129	0.141	0.217	0.256	0.165	0.166	0.129	0.125	0.139	0.291	0.174	0.469	0.11	0.334	0.174	0.42	0.375	0.211	0.112
378.478	0.5	0.419	0.331	0.425	0.463	0.35	0.463	0.445	0.402	0.383	0.325	0.109	0.313	0.12	0.185	0.201	0.125	0.125	0.125	0.453	0.286	0.243	0.121	0.151	0.166	0.119	0.144	0.113	0.192	0.187	0.129	0.145	0.224	0.256	0.165	0.174	0.138	0.135	0.137	0.286	0.183	0.481	0.111	0.346	0.176	0.434	0.398	0.209	0.106
379.309	0.504	0.419	0.345	0.395	0.498	0.367	0.443	0.457	0.399	0.403	0.318	0.1	0.314	0.12	0.182	0.2	0.121	0.123	0.125	0.454	0.29	0.238	0.115	0.148	0.167	0.12	0.143	0.111	0.191	0.188	0.125	0.139	0.225	0.251	0.159	0.173	0.137	0.129	0.138	0.302	0.181	0.474	0.11	0.35	0.18	0.433	0.388	0.215	0.11
380.047	0.513	0.406	0.336	0.405	0.501	0.347	0.454	0.461	0.422	0.396	0.327	0.104	0.315	0.123	0.183	0.208	0.121	0.123	0.124	0.45	0.28	0.244	0.118	0.155	0.172	0.121	0.146	0.114	0.192	0.191	0.126	0.145	0.222	0.256	0.167	0.175	0.137	0.131	0.141	0.298	0.181	0.473	0.11	0.339	0.185	0.445	0.385	0.212	0.11
380.812	0.532	0.431	0.361	0.45	0.515	0.391	0.506	0.482	0.435	0.416	0.34	0.105	0.319	0.123	0.176	0.2	0.125	0.119	0.127	0.447	0.28	0.244	0.104	0.154	0.167	0.117	0.141	0.11	0.192	0.184	0.124	0.142	0.224	0.265	0.169	0.17	0.14	0.125	0.14	0.298	0.188	0.463	0.111	0.362	0.178	0.432	0.408	0.208	0.112
381.611	0.525	0.445	0.365	0.442	0.5	0.405	0.485	0.497	0.429	0.415	0.35	0.101	0.323	0.124	0.19	0.21	0.126	0.13	0.126	0.459	0.282	0.239	0.124	0.154	0.161	0.118	0.143	0.113	0.189	0.19	0.124	0.144	0.226	0.267	0.173	0.174	0.135	0.129	0.143	0.284	0.192	0.464	0.111	0.34	0.174	0.449	0.385	0.207	0.111
382.395	0.495	0.419	0.325	0.394	0.445	0.371	0.461	0.433	0.411	0.386	0.342	0.105	0.309	0.124	0.185	0.208	0.128	0.125	0.126	0.455	0.303	0.247	0.118	0.16	0.169	0.121	0.147	0.114	0.19	0.193	0.125	0.143	0.228	0.259	0.168	0.173	0.133	0.134	0.135	0.291	0.192	0.476	0.108	0.329	0.181	0.437	0.39	0.211	0.114
383.145	0.516	0.407	0.35	0.412	0.52	0.39	0.454	0.451	0.407	0.394	0.322	0.103	0.317	0.13	0.187	0.213	0.127	0.127	0.129	0.455	0.285	0.249	0.104	0.156	0.172	0.121	0.144	0.112	0.19	0.189	0.125	0.147	0.227	0.27	0.164	0.177	0.137	0.13	0.14	0.301	0.184	0.467	0.111	0.34	0.181	0.425	0.393	0.214	0.113
383.898	0.549	0.437	0.375	0.461	0.519	0.394	0.468	0.467	0.427	0.415	0.345	0.103	0.32	0.129	0.191	0.215	0.125	0.133	0.131	0.458	0.291	0.246	0.119	0.158	0.166	0.123	0.15	0.113	0.195	0.195	0.13	0.145	0.23	0.269	0.176	0.172	0.139	0.137	0.14	0.294	0.188	0.487	0.109	0.337	0.188	0.456	0.402	0.216	0.113
384.65	0.475	0.418	0.351	0.403	0.461	0.347	0.466	0.459	0.411	0.393	0.33	0.103	0.318	0.127	0.186	0.21	0.129	0.122	0.134	0.464	0.293	0.247	0.115	0.154	0.171	0.12	0.149	0.111	0.195	0.182	0.125	0.148	0.232	0.272	0.177	0.171	0.134	0.132	0.145	0.289	0.191	0.451	0.112	0.331	0.188	0.444	0.383	0.22	0.114
385.385	0.545	0.437	0.386	0.428	0.496	0.384	0.488	0.478	0.423	0.416	0.347	0.101	0.309	0.13	0.192	0.215	0.128	0.123	0.126	0.457	0.295	0.237	0.118	0.155	0.168	0.121	0.145	0.113	0.191	0.191	0.126	0.144	0.224	0.27	0.178	0.173	0.137	0.128	0.142	0.289	0.188	0.461	0.11	0.317	0.163	0.428	0.378	0.217	0.113
386.136	0.514	0.424	0.353	0.394	0.441	0.364	0.441	0.435	0.41	0.393	0.324	0.105	0.326	0.13	0.19	0.217	0.132	0.126	0.132	0.457	0.3	0.245	0.121	0.159	0.164	0.121	0.149	0.115	0.192	0.189	0.124	0.149	0.228	0.279	0.183	0.177	0.139	0.136	0.146	0.31	0.191	0.458	0.108	0.339	0.173	0.458	0.376	0.222	0.116
386.888	0.548	0.449	0.386	0.437	0.542	0.383	0.48	0.492	0.435	0.418	0.348	0.111	0.331	0.142	0.202	0.227	0.146	0.136	0.146	0.483	0.334	0.266	0.144	0.169	0.18	0.126	0.161	0.121	0.203	0.194	0.14	0.161	0.243	0.286	0.204	0.186	0.151	0.15	0.152	0.333	0.2	0.527	0.119	0.368	0.193	0.475	0.45	0.238	0.123
387.638	0.51	0.42	0.344	0.409	0.504	0.377	0.465	0.46	0.417	0.391	0.327	0.102	0.311	0.13	0.188	0.213	0.131	0.127	0.136	0.463	0.301	0.25	0.125	0.157	0.161	0.123	0.154	0.114	0.193	0.189	0.132	0.15	0.237	0.275	0.183	0.176	0.143	0.13	0.14	0.299	0.196	0.429	0.107	0.336	0.178	0.455	0.404	0.226	0.118
388.391	0.54	0.441	0.376	0.456	0.559	0.379	0.471	0.47	0.437	0.412	0.344	0.106	0.31	0.134	0.192	0.22	0.127	0.117	0.129	0.467	0.307	0.244	0.129	0.162	0.168	0.12	0.152	0.114	0.193	0.192	0.128	0.151	0.229	0.276	0.196	0.178	0.138	0.129	0.145	0.286	0.193	0.452	0.11	0.345	0.192	0.454	0.388	0.227	0.117
389.174	0.566	0.442	0.39	0.466	0.505	0.399	0.484	0.512	0.429	0.425	0.35	0.104	0.313	0.131	0.186	0.217	0.129	0.121	0.132	0.47	0.315	0.252	0.124	0.157	0.167	0.121	0.15	0.113	0.188	0.185	0.134	0.15	0.232	0.274	0.189	0.175	0.138	0.129	0.144	0.289	0.191	0.479	0.111	0.338	0.189	0.478	0.381	0.234	0.114
389.925	0.579	0.439	0.389	0.456	0.533	0.381	0.478	0.512	0.44	0.423	0.344	0.101	0.315	0.135	0.189	0.226	0.132	0.125	0.135	0.462	0.324	0.247	0.127	0.161	0.172	0.12	0.158	0.113	0.191	0.189	0.131	0.15	0.234	0.276	0.191	0.173	0.142	0.137	0.146	0.292	0.192	0.45	0.108	0.33	0.186	0.456	0.408	0.228	0.113
390.661	0.49	0.427	0.364	0.41	0.51	0.347	0.448	0.471	0.429	0.399	0.324	0.11	0.312	0.131	0.181	0.215	0.129	0.118	0.134	0.457	0.307	0.252	0.129	0.158	0.166	0.119	0.158	0.112	0.195	0.187	0.125	0.15	0.223	0.273	0.197	0.187	0.14	0.13	0.142	0.287	0.192	0.425	0.112	0.325	0.2	0.46	0.398	0.234	0.115
391.447	0.518	0.416	0.354	0.408	0.5	0.372	0.462	0.454	0.41	0.387	0.314	0.103	0.331	0.135	0.186	0.222	0.131	0.116	0.136	0.466	0.3	0.254	0.137	0.159	0.172	0.119	0.161	0.114	0.194	0.188	0.127	0.153	0.232	0.275	0.197	0.18	0.143	0.138	0.148	0.308	0.195	0.451	0.112	0.339	0.198	0.455	0.412	0.233	0.119
392.18	0.498	0.403	0.354	0.414	0.461	0.353	0.447	0.443	0.384	0.378	0.317	0.102	0.327	0.133	0.186	0.222	0.134	0.123	0.14	0.46	0.307	0.251	0.133	0.161	0.166	0.121	0.158	0.112	0.196	0.196	0.13	0.156	0.235	0.283	0.195	0.177	0.142	0.13	0.145	0.312	0.197	0.425	0.11	0.323	0.184	0.443	0.405	0.229	0.119
392.916	0.522	0.414	0.364	0.431	0.476	0.398	0.446	0.475	0.404	0.389	0.339	0.107	0.307	0.135	0.186	0.217	0.129	0.117	0.138	0.472	0.305	0.256	0.125	0.166	0.171	0.122	0.163	0.115	0.197	0.195	0.128	0.151	0.23	0.282	0.209	0.177	0.141	0.13	0.147	0.308	0.197	0.432	0.11	0.325	0.194	0.451	0.387	0.235	0.117
393.667	0.555	0.432	0.382	0.446	0.515	0.389	0.464	0.444	0.428	0.397	0.345	0.103	0.318	0.134	0.188	0.211	0.131	0.128	0.136	0.466	0.304	0.257	0.13	0.163	0.167	0.123	0.165	0.115	0.2	0.185	0.128	0.156	0.23	0.278	0.209	0.184	0.141	0.133	0.149	0.307	0.197	0.456	0.111	0.32	0.175	0.436	0.398	0.234	0.117
394.435	0.557	0.448	0.395	0.439	0.5	0.395	0.485	0.525	0.434	0.409	0.351	0.103	0.316	0.132	0.181	0.21	0.13	0.116	0.137	0.452	0.293	0.247	0.131	0.159	0.174	0.123	0.163	0.114	0.197	0.18	0.126	0.155	0.224	0.272	0.206	0.179	0.14	0.134	0.145	0.294	0.198	0.451	0.116	0.315	0.204	0.45	0.383	0.235	0.12
395.17	0.546	0.443	0.378	0.463	0.549	0.381	0.487	0.5	0.445	0.41	0.342	0.107	0.323	0.136	0.194	0.216	0.128	0.119	0.139	0.462	0.301	0.251	0.135	0.164	0.166	0.121	0.172	0.113	0.198	0.187	0.124	0.153	0.235	0.282	0.201	0.177	0.141	0.136	0.146	0.305	0.202	0.437	0.11	0.334	0.192	0.44	0.434	0.238	0.124
395.999	0.527	0.428	0.378	0.428	0.492	0.364	0.446	0.447	0.413	0.395	0.324	0.104	0.317	0.134	0.184	0.214	0.127	0.12	0.137	0.455	0.294	0.249	0.129	0.162	0.167	0.124	0.166	0.113	0.2	0.186	0.123	0.155	0.231	0.288	0.208	0.178	0.144	0.125	0.142	0.282	0.198	0.399	0.112	0.322	0.168	0.428	0.403	0.243	0.118
396.736	0.49	0.413	0.352	0.41	0.433	0.391	0.43	0.438	0.402	0.381	0.32	0.108	0.314	0.132	0.178	0.205	0.123	0.111	0.131	0.458	0.274	0.243	0.118	0.159	0.165	0.12	0.167	0.112	0.187	0.183	0.124	0.15	0.232	0.28	0.205	0.178	0.143	0.129	0.151	0.297	0.207	0.44	0.117	0.333	0.183	0.461	0.375	0.24	0.114
397.473	0.53	0.436	0.372	0.442	0.482	0.353	0.463	0.467	0.421	0.403	0.345	0.109	0.315	0.131	0.195	0.215	0.13	0.121	0.146	0.465	0.315	0.247	0.125	0.165	0.165	0.123	0.173	0.116	0.195	0.184	0.126	0.159	0.234	0.29	0.214	0.185	0.15	0.132	0.148	0.308	0.205	0.424	0.113	0.318	0.201	0.456	0.411	0.239	0.118
398.207	0.52	0.414	0.362	0.402	0.451	0.352	0.449	0.438	0.395	0.388	0.315	0.105	0.317	0.132	0.183	0.219	0.128	0.119	0.143	0.453	0.308	0.246	0.123	0.162	0.166	0.123	0.172	0.118	0.192	0.18	0.128	0.154	0.233	0.277	0.204	0.181	0.142	0.137	0.146	0.301	0.203	0.388	0.112	0.316	0.184	0.43	0.41	0.241	0.116
398.944	0.537	0.421	0.376	0.454	0.473	0.388	0.46	0.477	0.414	0.405	0.34	0.104	0.316	0.133	0.188	0.215	0.128	0.122	0.139	0.462	0.3	0.248	0.128	0.162	0.174	0.126	0.172	0.117	0.199	0.181	0.128	0.158	0.234	0.281	0.22	0.186	0.143	0.135	0.147	0.29	0.205	0.386	0.114	0.331	0.176	0.455	0.416	0.243	0.119
399.695	0.549	0.445	0.392	0.445	0.536	0.386	0.48	0.488	0.43	0.413	0.356	0.104	0.315	0.139	0.186	0.221	0.129	0.121	0.14	0.455	0.304	0.242	0.124	0.165	0.163	0.124	0.173	0.116	0.199	0.186	0.127	0.161	0.231	0.281	0.213	0.18	0.143	0.132	0.152	0.287	0.202	0.399	0.113	0.317	0.193	0.434	0.392	0.241	0.12
400.464	0.526	0.427	0.378	0.443	0.52	0.357	0.452	0.469	0.421	0.41	0.349	0.104	0.301	0.136	0.179	0.224	0.123	0.119	0.138	0.455	0.295	0.247	0.131	0.165	0.169	0.122	0.174	0.116	0.198	0.187	0.125	0.157	0.228	0.291	0.209	0.18	0.15	0.126	0.149	0.298	0.206	0.402	0.113	0.316	0.185	0.447	0.409	0.241	0.118
401.198	0.506	0.415	0.359	0.403	0.477	0.35	0.467	0.415	0.398	0.368	0.326	0.104	0.309	0.138	0.184	0.216	0.128	0.128	0.14	0.466	0.305	0.243	0.119	0.163	0.171	0.123	0.179	0.117	0.195	0.183	0.126	0.16	0.231	0.287	0.21	0.177	0.151	0.131	0.151	0.298	0.206	0.394	0.112	0.31	0.203	0.447	0.413	0.25	0.119
402.014	0.503	0.424	0.358	0.417	0.469	0.347	0.448	0.435	0.396	0.382	0.34	0.106	0.31	0.136	0.188	0.223	0.131	0.125	0.139	0.464	0.313	0.248	0.126	0.167	0.171	0.125	0.18	0.116	0.201	0.19	0.128	0.159	0.232	0.28	0.201	0.184	0.141	0.129	0.146	0.29	0.211	0.384	0.109	0.316	0.177	0.441	0.421	0.243	0.123
402.764	0.546	0.437	0.402	0.477	0.557	0.4	0.495	0.481	0.433	0.422	0.349	0.104	0.313	0.134	0.19	0.224	0.131	0.126	0.149	0.466	0.304	0.235	0.129	0.167	0.175	0.126	0.181	0.118	0.2	0.195	0.125	0.163	0.233	0.288	0.22	0.185	0.15	0.132	0.149	0.288	0.215	0.422	0.118	0.302	0.186	0.443	0.402	0.257	0.12
403.596	0.558	0.449	0.391	0.461	0.506	0.41	0.487	0.484	0.428	0.409	0.353	0.106	0.314	0.137	0.185	0.229	0.129	0.123	0.142	0.459	0.298	0.237	0.133	0.171	0.173	0.125	0.185	0.117	0.201	0.19	0.129	0.166	0.227	0.288	0.213	0.179	0.146	0.129	0.15	0.296	0.205	0.374	0.114	0.321	0.186	0.432	0.374	0.252	0.121
404.354	0.498	0.42	0.351	0.409	0.455	0.352	0.436	0.451	0.393	0.375	0.318	0.105	0.307	0.133	0.192	0.229	0.125	0.121	0.145	0.459	0.311	0.24	0.135	0.169	0.175	0.123	0.185	0.12	0.204	0.185	0.128	0.166	0.229	0.295	0.222	0.179	0.142	0.138	0.154	0.278	0.213	0.377	0.112	0.309	0.182	0.43	0.415	0.26	0.121
405.1	0.527	0.435	0.366	0.436	0.515	0.377	0.458	0.481	0.411	0.394	0.355	0.101	0.32	0.135	0.192	0.229	0.133	0.117	0.147	0.461	0.302	0.243	0.128	0.167	0.173	0.124	0.185	0.118	0.207	0.186	0.125	0.172	0.228	0.293	0.213	0.182	0.151	0.137	0.15	0.296	0.206	0.387	0.113	0.31	0.179	0.44	0.427	0.264	0.118
405.916	0.522	0.432	0.392	0.438	0.471	0.384	0.46	0.464	0.408	0.399	0.354	0.101	0.314	0.139	0.192	0.231	0.131	0.123	0.15	0.463	0.319	0.238	0.122	0.166	0.173	0.122	0.184	0.116	0.197	0.184	0.131	0.165	0.239	0.289	0.215	0.182	0.139	0.128	0.15	0.312	0.21	0.384	0.112	0.315	0.183	0.442	0.407	0.265	0.12
406.683	0.55	0.446	0.386	0.447	0.53	0.379	0.461	0.474	0.412	0.394	0.343	0.114	0.336	0.155	0.213	0.253	0.146	0.133	0.161	0.478	0.355	0.262	0.165	0.175	0.193	0.131	0.197	0.126	0.214	0.197	0.141	0.184	0.251	0.312	0.248	0.192	0.16	0.15	0.164	0.337	0.226	0.408	0.125	0.335	0.211	0.477	0.464	0.276	0.129
407.467	0.527	0.436	0.395	0.433	0.512	0.369	0.458	0.47	0.412	0.395	0.342	0.103	0.308	0.143	0.188	0.236	0.136	0.121	0.15	0.463	0.319	0.241	0.134	0.167	0.179	0.123	0.189	0.117	0.198	0.179	0.126	0.172	0.235	0.298	0.22	0.191	0.144	0.132	0.158	0.29	0.211	0.372	0.116	0.308	0.184	0.435	0.417	0.26	0.12
408.218	0.509	0.41	0.371	0.407	0.474	0.341	0.432	0.407	0.39	0.364	0.334	0.104	0.317	0.143	0.187	0.231	0.13	0.124	0.145	0.457	0.309	0.238	0.13	0.164	0.172	0.122	0.185	0.116	0.193	0.188	0.124	0.168	0.227	0.295	0.229	0.19	0.149	0.133	0.163	0.28	0.211	0.384	0.116	0.321	0.194	0.447	0.394	0.267	0.121
409.001	0.492	0.413	0.369	0.409	0.469	0.335	0.425	0.437	0.404	0.371	0.328	0.104	0.309	0.142	0.199	0.24	0.129	0.125	0.147	0.463	0.312	0.241	0.135	0.17	0.175	0.124	0.194	0.116	0.199	0.186	0.125	0.174	0.236	0.298	0.215	0.184	0.153	0.127	0.163	0.287	0.216	0.365	0.111	0.31	0.189	0.433	0.421	0.267	0.124
409.817	0.543	0.431	0.382	0.447	0.497	0.378	0.461	0.506	0.419	0.402	0.351	0.108	0.308	0.142	0.2	0.239	0.133	0.127	0.148	0.459	0.33	0.251	0.135	0.168	0.179	0.126	0.19	0.119	0.199	0.19	0.132	0.175	0.236	0.305	0.224	0.19	0.149	0.142	0.161	0.313	0.217	0.358	0.118	0.304	0.185	0.437	0.416	0.263	0.122
410.552	0.489	0.408	0.368	0.428	0.469	0.329	0.429	0.444	0.387	0.372	0.332	0.106	0.318	0.15	0.198	0.237	0.126	0.12	0.146	0.465	0.332	0.24	0.134	0.165	0.171	0.122	0.194	0.116	0.196	0.188	0.125	0.174	0.237	0.302	0.221	0.186	0.153	0.138	0.157	0.282	0.211	0.338	0.11	0.308	0.182	0.428	0.414	0.26	0.118
411.32	0.505	0.442	0.387	0.442	0.548	0.375	0.456	0.461	0.431	0.404	0.354	0.107	0.324	0.145	0.199	0.236	0.129	0.118	0.145	0.446	0.309	0.231	0.133	0.163	0.172	0.125	0.191	0.116	0.199	0.191	0.124	0.177	0.231	0.304	0.224	0.187	0.155	0.136	0.159	0.291	0.203	0.354	0.114	0.302	0.187	0.423	0.389	0.266	0.125
412.071	0.532	0.438	0.403	0.443	0.513	0.362	0.46	0.466	0.416	0.403	0.344	0.106	0.318	0.144	0.198	0.236	0.129	0.119	0.149	0.455	0.336	0.239	0.147	0.168	0.172	0.124	0.2	0.119	0.196	0.189	0.129	0.179	0.23	0.305	0.22	0.189	0.151	0.143	0.161	0.263	0.21	0.333	0.113	0.301	0.194	0.431	0.431	0.257	0.123
412.807	0.519	0.432	0.389	0.444	0.492	0.383	0.453	0.485	0.424	0.391	0.35	0.11	0.342	0.159	0.219	0.251	0.143	0.129	0.152	0.482	0.367	0.262	0.155	0.18	0.193	0.132	0.21	0.124	0.213	0.205	0.134	0.192	0.248	0.326	0.236	0.201	0.169	0.15	0.171	0.301	0.233	0.358	0.119	0.319	0.217	0.448	0.458	0.274	0.124
413.558	0.531	0.438	0.396	0.459	0.509	0.361	0.457	0.466	0.407	0.389	0.346	0.112	0.355	0.152	0.212	0.251	0.133	0.13	0.155	0.473	0.356	0.257	0.141	0.177	0.181	0.131	0.208	0.124	0.203	0.187	0.131	0.187	0.242	0.33	0.249	0.206	0.166	0.142	0.182	0.305	0.224	0.38	0.122	0.316	0.214	0.473	0.485	0.278	0.133
414.31	0.471	0.407	0.366	0.406	0.465	0.36	0.436	0.438	0.395	0.374	0.318	0.11	0.328	0.148	0.206	0.243	0.136	0.125	0.149	0.458	0.33	0.24	0.136	0.172	0.181	0.129	0.202	0.119	0.2	0.192	0.132	0.181	0.234	0.307	0.235	0.189	0.157	0.125	0.174	0.29	0.22	0.344	0.115	0.311	0.188	0.43	0.432	0.267	0.127
415.077	0.511	0.422	0.377	0.409	0.488	0.344	0.439	0.46	0.387	0.375	0.336	0.109	0.35	0.15	0.211	0.261	0.136	0.134	0.152	0.47	0.373	0.254	0.142	0.175	0.189	0.131	0.206	0.123	0.208	0.207	0.133	0.192	0.237	0.332	0.235	0.197	0.16	0.142	0.177	0.299	0.225	0.355	0.12	0.322	0.205	0.449	0.439	0.28	0.13
415.813	0.523	0.437	0.393	0.445	0.517	0.372	0.453	0.469	0.417	0.387	0.354	0.106	0.334	0.149	0.208	0.24	0.135	0.118	0.15	0.461	0.361	0.245	0.132	0.174	0.179	0.129	0.21	0.124	0.2	0.194	0.133	0.185	0.233	0.314	0.239	0.194	0.151	0.138	0.174	0.287	0.222	0.355	0.114	0.317	0.194	0.442	0.433	0.268	0.128
416.547	0.515	0.448	0.41	0.455	0.517	0.407	0.487	0.45	0.427	0.391	0.362	0.108	0.356	0.146	0.214	0.247	0.133	0.126	0.148	0.459	0.344	0.248	0.138	0.175	0.181	0.131	0.206	0.124	0.212	0.205	0.13	0.189	0.235	0.323	0.225	0.196	0.156	0.143	0.18	0.285	0.219	0.345	0.117	0.329	0.192	0.447	0.43	0.278	0.125
417.3	0.535	0.428	0.395	0.438	0.501	0.379	0.465	0.489	0.427	0.387	0.346	0.108	0.347	0.154	0.21	0.242	0.137	0.125	0.154	0.463	0.359	0.246	0.133	0.179	0.187	0.134	0.211	0.124	0.213	0.197	0.133	0.19	0.243	0.327	0.233	0.197	0.167	0.144	0.183	0.265	0.217	0.347	0.119	0.32	0.2	0.45	0.472	0.281	0.132
418.051	0.481	0.404	0.381	0.413	0.461	0.348	0.444	0.458	0.394	0.365	0.327	0.111	0.346	0.152	0.208	0.243	0.134	0.126	0.142	0.458	0.352	0.235	0.156	0.178	0.181	0.132	0.212	0.121	0.208	0.191	0.135	0.191	0.232	0.317	0.236	0.194	0.16	0.148	0.182	0.286	0.217	0.335	0.115	0.303	0.197	0.431	0.453	0.274	0.125
418.803	0.525	0.447	0.397	0.449	0.493	0.364	0.464	0.48	0.42	0.394	0.346	0.108	0.34	0.153	0.21	0.244	0.135	0.121	0.15	0.455	0.335	0.242	0.145	0.175	0.185	0.131	0.207	0.125	0.207	0.197	0.133	0.191	0.231	0.323	0.24	0.193	0.165	0.136	0.183	0.243	0.218	0.345	0.117	0.299	0.2	0.43	0.457	0.272	0.131
419.554	0.468	0.431	0.365	0.412	0.458	0.368	0.417	0.447	0.406	0.364	0.337	0.107	0.339	0.153	0.209	0.234	0.138	0.122	0.147	0.456	0.335	0.245	0.136	0.177	0.184	0.131	0.21	0.124	0.213	0.2	0.131	0.192	0.226	0.337	0.24	0.191	0.158	0.135	0.178	0.256	0.222	0.345	0.117	0.297	0.197	0.433	0.431	0.269	0.128
420.304	0.491	0.413	0.366	0.439	0.464	0.347	0.439	0.431	0.391	0.362	0.325	0.108	0.347	0.149	0.216	0.24	0.136	0.126	0.149	0.464	0.335	0.238	0.141	0.178	0.183	0.134	0.211	0.125	0.212	0.19	0.13	0.189	0.226	0.317	0.23	0.197	0.156	0.142	0.176	0.273	0.224	0.333	0.114	0.307	0.204	0.418	0.433	0.271	0.131
421.057	0.469	0.425	0.373	0.405	0.473	0.344	0.435	0.436	0.41	0.354	0.326	0.111	0.352	0.148	0.222	0.236	0.137	0.13	0.152	0.455	0.36	0.238	0.142	0.178	0.189	0.134	0.21	0.126	0.218	0.197	0.132	0.19	0.229	0.32	0.241	0.194	0.163	0.149	0.18	0.262	0.234	0.325	0.114	0.297	0.205	0.43	0.444	0.273	0.128
421.809	0.507	0.459	0.409	0.455	0.532	0.373	0.461	0.454	0.416	0.39	0.343	0.116	0.381	0.169	0.235	0.253	0.149	0.139	0.162	0.476	0.41	0.269	0.168	0.193	0.198	0.14	0.237	0.134	0.23	0.206	0.151	0.208	0.25	0.351	0.271	0.214	0.189	0.152	0.199	0.285	0.252	0.387	0.127	0.336	0.223	0.457	0.502	0.303	0.139
422.56	0.507	0.441	0.403	0.447	0.518	0.376	0.46	0.443	0.421	0.383	0.337	0.111	0.351	0.149	0.215	0.232	0.13	0.124	0.151	0.457	0.353	0.237	0.135	0.182	0.183	0.133	0.214	0.126	0.219	0.199	0.139	0.193	0.225	0.325	0.235	0.194	0.16	0.14	0.181	0.26	0.229	0.33	0.117	0.29	0.202	0.433	0.467	0.276	0.124
423.296	0.462	0.412	0.362	0.422	0.457	0.366	0.432	0.404	0.397	0.357	0.323	0.109	0.34	0.153	0.211	0.228	0.139	0.125	0.153	0.45	0.367	0.244	0.143	0.18	0.187	0.135	0.213	0.127	0.223	0.206	0.141	0.198	0.225	0.331	0.237	0.196	0.164	0.14	0.187	0.262	0.226	0.328	0.115	0.296	0.18	0.44	0.433	0.271	0.124
424.064	0.51	0.441	0.417	0.431	0.531	0.352	0.457	0.463	0.438	0.385	0.336	0.108	0.353	0.147	0.218	0.231	0.137	0.123	0.147	0.445	0.351	0.24	0.135	0.18	0.184	0.135	0.217	0.127	0.215	0.21	0.134	0.19	0.226	0.334	0.241	0.204	0.165	0.146	0.184	0.252	0.232	0.33	0.12	0.295	0.19	0.419	0.465	0.279	0.124
424.895	0.473	0.436	0.367	0.39	0.478	0.329	0.427	0.41	0.406	0.358	0.327	0.107	0.346	0.148	0.218	0.23	0.132	0.126	0.15	0.438	0.38	0.241	0.121	0.181	0.184	0.134	0.216	0.127	0.213	0.191	0.135	0.193	0.219	0.336	0.244	0.196	0.167	0.138	0.183	0.245	0.225	0.323	0.115	0.296	0.197	0.431	0.449	0.268	0.123
425.628	0.524	0.441	0.396	0.435	0.508	0.367	0.46	0.466	0.425	0.372	0.341	0.116	0.379	0.163	0.245	0.238	0.149	0.144	0.169	0.469	0.405	0.255	0.174	0.194	0.208	0.141	0.235	0.139	0.23	0.21	0.146	0.211	0.242	0.349	0.274	0.217	0.18	0.163	0.202	0.284	0.246	0.356	0.124	0.318	0.22	0.47	0.491	0.285	0.134
426.381	0.52	0.441	0.406	0.448	0.538	0.368	0.468	0.451	0.421	0.379	0.346	0.108	0.352	0.15	0.224	0.224	0.132	0.125	0.148	0.446	0.356	0.239	0.136	0.182	0.189	0.138	0.217	0.129	0.22	0.195	0.135	0.198	0.225	0.34	0.258	0.202	0.158	0.141	0.187	0.252	0.235	0.329	0.116	0.318	0.185	0.437	0.456	0.268	0.129
427.138	0.514	0.452	0.391	0.472	0.492	0.364	0.462	0.446	0.432	0.371	0.351	0.111	0.355	0.146	0.228	0.23	0.138	0.129	0.15	0.445	0.369	0.242	0.136	0.183	0.187	0.136	0.216	0.13	0.221	0.198	0.13	0.198	0.216	0.336	0.243	0.203	0.165	0.138	0.187	0.254	0.229	0.328	0.117	0.296	0.173	0.423	0.491	0.268	0.126
427.901	0.49	0.434	0.367	0.413	0.476	0.333	0.432	0.444	0.418	0.361	0.313	0.12	0.358	0.162	0.238	0.236	0.149	0.134	0.16	0.459	0.415	0.252	0.159	0.188	0.2	0.144	0.23	0.135	0.235	0.204	0.148	0.213	0.232	0.358	0.275	0.21	0.178	0.162	0.204	0.264	0.246	0.336	0.126	0.325	0.204	0.475	0.475	0.281	0.137
428.636	0.486	0.42	0.361	0.406	0.46	0.32	0.431	0.442	0.408	0.354	0.332	0.114	0.347	0.146	0.217	0.213	0.13	0.12	0.144	0.434	0.37	0.23	0.12	0.183	0.181	0.137	0.214	0.128	0.225	0.197	0.135	0.196	0.214	0.337	0.259	0.207	0.166	0.151	0.194	0.241	0.236	0.328	0.12	0.302	0.194	0.437	0.409	0.274	0.127
429.388	0.488	0.419	0.384	0.403	0.471	0.334	0.468	0.422	0.411	0.35	0.316	0.111	0.346	0.149	0.227	0.225	0.13	0.121	0.147	0.432	0.371	0.231	0.145	0.179	0.185	0.136	0.225	0.127	0.219	0.202	0.135	0.196	0.216	0.335	0.245	0.2	0.164	0.149	0.192	0.236	0.225	0.336	0.118	0.306	0.184	0.434	0.434	0.27	0.118
430.139	0.482	0.422	0.36	0.431	0.472	0.35	0.43	0.427	0.412	0.355	0.325	0.11	0.346	0.141	0.225	0.219	0.132	0.129	0.142	0.435	0.369	0.232	0.142	0.178	0.186	0.139	0.217	0.13	0.215	0.2	0.131	0.198	0.216	0.346	0.244	0.203	0.165	0.14	0.189	0.224	0.235	0.313	0.118	0.304	0.177	0.435	0.45	0.268	0.124
430.891	0.492	0.4	0.364	0.403	0.448	0.332	0.424	0.442	0.406	0.361	0.321	0.109	0.353	0.146	0.223	0.215	0.132	0.114	0.144	0.438	0.382	0.243	0.141	0.182	0.187	0.14	0.217	0.133	0.219	0.194	0.13	0.196	0.212	0.337	0.25	0.201	0.16	0.152	0.189	0.225	0.235	0.321	0.116	0.294	0.187	0.412	0.445	0.264	0.124
431.693	0.532	0.444	0.381	0.44	0.501	0.373	0.478	0.469	0.436	0.376	0.337	0.114	0.346	0.148	0.225	0.211	0.131	0.125	0.141	0.434	0.363	0.237	0.139	0.177	0.185	0.139	0.215	0.131	0.216	0.192	0.137	0.199	0.213	0.346	0.255	0.2	0.174	0.149	0.203	0.243	0.228	0.312	0.117	0.294	0.198	0.411	0.423	0.261	0.125
432.441	0.505	0.416	0.365	0.395	0.44	0.342	0.443	0.457	0.424	0.358	0.31	0.117	0.364	0.159	0.251	0.231	0.15	0.143	0.162	0.452	0.396	0.261	0.168	0.189	0.209	0.146	0.233	0.141	0.234	0.214	0.146	0.22	0.225	0.365	0.288	0.212	0.185	0.167	0.214	0.259	0.254	0.35	0.123	0.318	0.214	0.465	0.496	0.288	0.133
433.193	0.542	0.447	0.381	0.445	0.521	0.386	0.451	0.47	0.44	0.374	0.329	0.112	0.329	0.146	0.231	0.204	0.134	0.123	0.15	0.419	0.352	0.231	0.127	0.178	0.189	0.136	0.214	0.129	0.217	0.195	0.132	0.195	0.207	0.346	0.256	0.195	0.169	0.15	0.202	0.226	0.232	0.317	0.114	0.295	0.195	0.423	0.449	0.27	0.123
433.945	0.515	0.466	0.378	0.45	0.5	0.34	0.477	0.462	0.433	0.37	0.333	0.107	0.326	0.142	0.222	0.209	0.131	0.125	0.143	0.421	0.368	0.237	0.136	0.176	0.188	0.137	0.213	0.132	0.219	0.197	0.138	0.195	0.205	0.331	0.247	0.196	0.158	0.145	0.201	0.208	0.225	0.311	0.116	0.291	0.185	0.41	0.405	0.256	0.12
434.71	0.543	0.443	0.368	0.437	0.534	0.352	0.448	0.472	0.425	0.373	0.333	0.112	0.327	0.141	0.22	0.204	0.131	0.121	0.151	0.421	0.354	0.237	0.14	0.175	0.183	0.137	0.208	0.133	0.213	0.197	0.132	0.197	0.206	0.336	0.255	0.203	0.164	0.145	0.188	0.222	0.23	0.319	0.117	0.293	0.184	0.396	0.48	0.266	0.123
435.432	0.533	0.44	0.374	0.437	0.515	0.379	0.471	0.471	0.421	0.377	0.342	0.112	0.334	0.149	0.224	0.206	0.138	0.128	0.151	0.415	0.37	0.226	0.127	0.181	0.197	0.14	0.214	0.131	0.221	0.198	0.14	0.197	0.206	0.342	0.259	0.196	0.163	0.149	0.193	0.198	0.226	0.304	0.117	0.287	0.194	0.405	0.447	0.263	0.118
436.182	0.484	0.416	0.346	0.418	0.466	0.324	0.429	0.441	0.412	0.341	0.311	0.108	0.327	0.141	0.218	0.203	0.13	0.117	0.145	0.413	0.365	0.228	0.133	0.176	0.183	0.137	0.214	0.131	0.213	0.199	0.138	0.196	0.203	0.349	0.253	0.195	0.16	0.158	0.189	0.226	0.226	0.309	0.115	0.296	0.196	0.406	0.428	0.263	0.122
436.951	0.526	0.44	0.402	0.438	0.523	0.343	0.474	0.472	0.43	0.378	0.34	0.11	0.325	0.143	0.22	0.199	0.136	0.123	0.152	0.412	0.347	0.228	0.13	0.176	0.184	0.139	0.21	0.131	0.21	0.207	0.142	0.194	0.197	0.341	0.252	0.209	0.163	0.143	0.189	0.214	0.225	0.294	0.115	0.287	0.186	0.408	0.456	0.265	0.123
437.735	0.478	0.421	0.356	0.39	0.503	0.321	0.426	0.44	0.409	0.352	0.314	0.11	0.327	0.142	0.217	0.202	0.137	0.122	0.147	0.409	0.381	0.232	0.142	0.175	0.18	0.142	0.215	0.133	0.216	0.199	0.14	0.195	0.201	0.334	0.268	0.204	0.169	0.153	0.193	0.201	0.224	0.301	0.114	0.293	0.189	0.394	0.463	0.255	0.121
438.549	0.494	0.413	0.35	0.394	0.483	0.31	0.426	0.435	0.402	0.349	0.312	0.108	0.313	0.141	0.218	0.198	0.132	0.12	0.143	0.407	0.338	0.227	0.14	0.174	0.174	0.143	0.21	0.135	0.214	0.186	0.141	0.197	0.193	0.335	0.256	0.2	0.165	0.137	0.188	0.217	0.222	0.288	0.119	0.29	0.183	0.384	0.427	0.255	0.119
439.316	0.538	0.434	0.383	0.444	0.536	0.355	0.46	0.463	0.432	0.372	0.342	0.114	0.344	0.163	0.246	0.212	0.148	0.137	0.17	0.419	0.423	0.248	0.151	0.189	0.201	0.152	0.23	0.142	0.228	0.202	0.157	0.211	0.207	0.352	0.277	0.219	0.187	0.164	0.208	0.218	0.242	0.326	0.122	0.31	0.207	0.405	0.462	0.279	0.131
440.069	0.511	0.441	0.383	0.443	0.524	0.358	0.452	0.467	0.424	0.366	0.344	0.106	0.308	0.139	0.219	0.193	0.129	0.12	0.145	0.395	0.357	0.219	0.125	0.175	0.169	0.141	0.208	0.13	0.209	0.191	0.138	0.193	0.187	0.331	0.254	0.195	0.168	0.137	0.191	0.214	0.225	0.285	0.115	0.278	0.177	0.368	0.468	0.258	0.117
440.884	0.518	0.455	0.385	0.421	0.512	0.35	0.452	0.463	0.409	0.374	0.335	0.106	0.311	0.142	0.223	0.195	0.128	0.125	0.143	0.403	0.381	0.223	0.136	0.174	0.172	0.145	0.211	0.135	0.209	0.198	0.138	0.197	0.19	0.331	0.256	0.204	0.166	0.143	0.192	0.191	0.227	0.305	0.115	0.29	0.174	0.384	0.428	0.261	0.123
441.651	0.481	0.434	0.35	0.408	0.465	0.326	0.416	0.443	0.407	0.36	0.314	0.103	0.326	0.147	0.215	0.19	0.13	0.12	0.148	0.397	0.345	0.224	0.125	0.173	0.176	0.141	0.212	0.131	0.211	0.201	0.143	0.195	0.186	0.339	0.249	0.195	0.156	0.141	0.194	0.192	0.23	0.303	0.116	0.28	0.182	0.383	0.43	0.252	0.12
442.44	0.479	0.415	0.352	0.381	0.438	0.319	0.437	0.439	0.422	0.349	0.315	0.108	0.312	0.142	0.219	0.19	0.137	0.12	0.148	0.39	0.323	0.219	0.149	0.177	0.174	0.138	0.211	0.134	0.21	0.194	0.141	0.195	0.184	0.338	0.274	0.201	0.166	0.14	0.198	0.184	0.229	0.291	0.12	0.282	0.187	0.364	0.454	0.265	0.118
443.234	0.496	0.427	0.344	0.402	0.5	0.318	0.449	0.438	0.401	0.361	0.311	0.117	0.323	0.154	0.235	0.207	0.148	0.13	0.162	0.405	0.376	0.241	0.144	0.182	0.188	0.149	0.222	0.143	0.221	0.203	0.154	0.214	0.197	0.358	0.276	0.218	0.178	0.153	0.21	0.205	0.229	0.303	0.125	0.299	0.196	0.391	0.43	0.271	0.127
443.986	0.521	0.441	0.388	0.444	0.526	0.365	0.464	0.47	0.43	0.378	0.332	0.107	0.307	0.138	0.22	0.19	0.133	0.117	0.143	0.391	0.37	0.222	0.132	0.171	0.17	0.139	0.212	0.136	0.211	0.197	0.141	0.201	0.178	0.337	0.249	0.208	0.164	0.144	0.196	0.202	0.225	0.281	0.118	0.282	0.183	0.375	0.428	0.25	0.117
444.739	0.522	0.443	0.377	0.424	0.497	0.336	0.45	0.476	0.421	0.37	0.332	0.105	0.31	0.143	0.227	0.194	0.129	0.121	0.147	0.391	0.358	0.228	0.148	0.179	0.174	0.141	0.215	0.136	0.208	0.195	0.14	0.197	0.185	0.341	0.255	0.212	0.159	0.139	0.198	0.204	0.221	0.263	0.119	0.273	0.181	0.368	0.424	0.251	0.119
445.487	0.524	0.442	0.381	0.411	0.499	0.328	0.453	0.47	0.427	0.379	0.345	0.104	0.317	0.139	0.218	0.191	0.135	0.117	0.147	0.38	0.354	0.218	0.13	0.173	0.172	0.141	0.209	0.132	0.205	0.196	0.138	0.203	0.178	0.34	0.246	0.206	0.156	0.141	0.194	0.186	0.216	0.269	0.111	0.269	0.171	0.361	0.427	0.248	0.116
446.238	0.53	0.456	0.386	0.415	0.504	0.346	0.437	0.461	0.423	0.381	0.319	0.107	0.303	0.142	0.22	0.188	0.126	0.116	0.143	0.383	0.333	0.209	0.135	0.172	0.171	0.142	0.205	0.135	0.208	0.189	0.14	0.198	0.182	0.339	0.256	0.21	0.159	0.148	0.195	0.177	0.219	0.265	0.113	0.267	0.18	0.36	0.383	0.253	0.118
447.022	0.482	0.423	0.36	0.421	0.464	0.306	0.435	0.429	0.398	0.349	0.308	0.111	0.298	0.136	0.214	0.185	0.13	0.116	0.141	0.382	0.354	0.223	0.142	0.17	0.176	0.142	0.214	0.135	0.205	0.185	0.141	0.197	0.183	0.339	0.268	0.206	0.16	0.145	0.194	0.191	0.226	0.266	0.117	0.269	0.176	0.382	0.415	0.251	0.123
447.824	0.487	0.417	0.351	0.392	0.489	0.316	0.412	0.443	0.392	0.349	0.32	0.104	0.314	0.142	0.211	0.188	0.127	0.122	0.14	0.38	0.343	0.215	0.127	0.172	0.169	0.141	0.211	0.137	0.212	0.195	0.149	0.201	0.18	0.33	0.264	0.201	0.162	0.14	0.191	0.191	0.22	0.261	0.117	0.271	0.173	0.365	0.408	0.251	0.121
448.591	0.502	0.447	0.382	0.428	0.478	0.332	0.429	0.46	0.425	0.372	0.33	0.109	0.289	0.14	0.219	0.188	0.134	0.121	0.146	0.37	0.36	0.221	0.129	0.169	0.168	0.141	0.211	0.135	0.208	0.184	0.147	0.201	0.177	0.333	0.259	0.204	0.157	0.141	0.19	0.182	0.217	0.253	0.115	0.267	0.192	0.357	0.403	0.243	0.115
449.325	0.498	0.444	0.368	0.451	0.506	0.354	0.454	0.453	0.424	0.389	0.331	0.106	0.315	0.137	0.219	0.185	0.13	0.118	0.141	0.37	0.337	0.213	0.133	0.171	0.174	0.145	0.213	0.138	0.209	0.186	0.154	0.197	0.174	0.339	0.253	0.206	0.154	0.148	0.194	0.186	0.222	0.26	0.116	0.27	0.17	0.351	0.419	0.246	0.113
450.132	0.474	0.407	0.354	0.4	0.465	0.316	0.416	0.42	0.407	0.345	0.311	0.114	0.298	0.142	0.227	0.185	0.129	0.116	0.139	0.371	0.323	0.213	0.131	0.169	0.171	0.144	0.211	0.139	0.205	0.189	0.148	0.202	0.173	0.331	0.258	0.214	0.154	0.144	0.19	0.166	0.218	0.258	0.115	0.284	0.191	0.347	0.422	0.242	0.119
450.862	0.52	0.436	0.387	0.445	0.454	0.337	0.467	0.456	0.422	0.371	0.344	0.107	0.303	0.139	0.223	0.187	0.124	0.119	0.134	0.369	0.332	0.209	0.132	0.169	0.168	0.139	0.212	0.137	0.211	0.182	0.152	0.204	0.17	0.314	0.257	0.216	0.161	0.143	0.195	0.195	0.218	0.241	0.114	0.267	0.178	0.336	0.422	0.237	0.115
451.63	0.524	0.44	0.387	0.427	0.499	0.341	0.471	0.471	0.42	0.372	0.321	0.11	0.297	0.134	0.221	0.19	0.13	0.111	0.136	0.371	0.339	0.214	0.125	0.168	0.163	0.142	0.204	0.138	0.202	0.19	0.148	0.199	0.166	0.335	0.268	0.209	0.158	0.145	0.193	0.188	0.22	0.264	0.115	0.281	0.181	0.359	0.431	0.243	0.12
452.398	0.503	0.439	0.381	0.436	0.513	0.348	0.434	0.446	0.419	0.377	0.326	0.11	0.296	0.137	0.227	0.189	0.125	0.113	0.137	0.368	0.342	0.214	0.127	0.163	0.16	0.144	0.204	0.138	0.203	0.19	0.149	0.197	0.171	0.336	0.262	0.213	0.162	0.14	0.192	0.182	0.223	0.254	0.115	0.276	0.178	0.341	0.422	0.241	0.12
453.165	0.529	0.437	0.372	0.423	0.49	0.373	0.459	0.458	0.434	0.38	0.333	0.119	0.317	0.151	0.249	0.209	0.141	0.133	0.152	0.378	0.377	0.224	0.159	0.179	0.179	0.151	0.219	0.149	0.218	0.203	0.168	0.215	0.188	0.355	0.271	0.224	0.177	0.153	0.2	0.202	0.239	0.266	0.12	0.282	0.206	0.37	0.469	0.255	0.127
453.947	0.492	0.447	0.371	0.421	0.494	0.334	0.444	0.439	0.43	0.361	0.319	0.109	0.299	0.135	0.229	0.191	0.13	0.121	0.138	0.364	0.324	0.207	0.121	0.165	0.167	0.143	0.201	0.136	0.202	0.19	0.154	0.198	0.173	0.325	0.248	0.203	0.16	0.147	0.19	0.184	0.218	0.246	0.109	0.268	0.176	0.344	0.414	0.231	0.116
454.73	0.471	0.415	0.33	0.39	0.463	0.322	0.422	0.426	0.391	0.339	0.312	0.113	0.319	0.154	0.24	0.2	0.149	0.137	0.161	0.376	0.36	0.227	0.151	0.179	0.193	0.152	0.223	0.147	0.216	0.203	0.168	0.215	0.186	0.348	0.273	0.228	0.167	0.155	0.201	0.205	0.228	0.268	0.123	0.282	0.194	0.365	0.449	0.263	0.124
455.498	0.522	0.439	0.365	0.44	0.492	0.353	0.463	0.469	0.417	0.363	0.322	0.12	0.322	0.15	0.237	0.197	0.144	0.134	0.156	0.375	0.357	0.217	0.152	0.172	0.179	0.148	0.206	0.147	0.211	0.195	0.166	0.21	0.184	0.344	0.313	0.23	0.185	0.164	0.207	0.2	0.239	0.266	0.121	0.288	0.192	0.372	0.463	0.253	0.123
456.314	0.462	0.412	0.34	0.372	0.48	0.329	0.427	0.452	0.406	0.348	0.316	0.106	0.303	0.136	0.216	0.179	0.126	0.12	0.147	0.353	0.335	0.204	0.131	0.162	0.166	0.142	0.199	0.139	0.208	0.187	0.155	0.2	0.169	0.339	0.272	0.216	0.166	0.147	0.193	0.193	0.215	0.244	0.117	0.266	0.169	0.337	0.418	0.238	0.116
457.066	0.472	0.419	0.335	0.381	0.496	0.31	0.439	0.405	0.388	0.347	0.318	0.103	0.282	0.127	0.216	0.178	0.127	0.116	0.144	0.343	0.343	0.2	0.127	0.155	0.162	0.135	0.185	0.133	0.189	0.183	0.148	0.195	0.163	0.307	0.238	0.21	0.152	0.14	0.181	0.178	0.197	0.223	0.109	0.254	0.169	0.328	0.376	0.217	0.115
457.818	0.502	0.431	0.369	0.425	0.5	0.339	0.452	0.448	0.42	0.363	0.318	0.111	0.294	0.142	0.237	0.193	0.137	0.133	0.154	0.352	0.343	0.209	0.152	0.169	0.169	0.147	0.205	0.144	0.206	0.197	0.166	0.206	0.179	0.33	0.267	0.218	0.169	0.152	0.192	0.201	0.214	0.243	0.121	0.262	0.186	0.331	0.403	0.239	0.12
458.554	0.506	0.441	0.369	0.456	0.492	0.341	0.449	0.441	0.409	0.365	0.327	0.108	0.299	0.145	0.232	0.188	0.141	0.132	0.157	0.35	0.369	0.212	0.159	0.165	0.179	0.149	0.204	0.144	0.199	0.198	0.164	0.206	0.175	0.33	0.271	0.219	0.171	0.148	0.189	0.203	0.22	0.244	0.117	0.267	0.197	0.326	0.407	0.237	0.125
459.305	0.482	0.411	0.335	0.382	0.46	0.298	0.419	0.442	0.384	0.353	0.304	0.112	0.299	0.147	0.23	0.191	0.137	0.126	0.159	0.351	0.333	0.212	0.146	0.166	0.173	0.147	0.208	0.145	0.202	0.202	0.165	0.203	0.181	0.331	0.266	0.219	0.174	0.158	0.197	0.196	0.214	0.245	0.116	0.268	0.188	0.327	0.394	0.24	0.121
460.088	0.516	0.426	0.365	0.43	0.483	0.34	0.444	0.447	0.412	0.364	0.316	0.104	0.277	0.131	0.209	0.172	0.129	0.119	0.141	0.335	0.317	0.195	0.123	0.155	0.153	0.139	0.191	0.135	0.188	0.181	0.15	0.188	0.167	0.312	0.249	0.207	0.156	0.132	0.183	0.176	0.203	0.223	0.111	0.247	0.167	0.304	0.386	0.221	0.113
460.839	0.515	0.425	0.359	0.451	0.468	0.347	0.449	0.434	0.404	0.359	0.329	0.11	0.305	0.143	0.238	0.188	0.138	0.129	0.153	0.351	0.35	0.212	0.148	0.164	0.174	0.147	0.203	0.144	0.203	0.198	0.173	0.21	0.176	0.336	0.259	0.224	0.174	0.148	0.201	0.196	0.216	0.248	0.118	0.271	0.178	0.332	0.395	0.235	0.12
461.639	0.461	0.415	0.338	0.385	0.439	0.296	0.411	0.421	0.381	0.346	0.304	0.102	0.273	0.134	0.203	0.171	0.128	0.115	0.138	0.334	0.311	0.188	0.123	0.153	0.156	0.139	0.19	0.138	0.19	0.186	0.152	0.193	0.165	0.32	0.253	0.208	0.155	0.135	0.171	0.186	0.199	0.23	0.108	0.243	0.164	0.308	0.383	0.217	0.113
462.39	0.497	0.43	0.355	0.421	0.498	0.333	0.461	0.452	0.408	0.363	0.326	0.107	0.292	0.145	0.229	0.179	0.144	0.136	0.158	0.342	0.366	0.211	0.158	0.162	0.176	0.149	0.202	0.146	0.203	0.202	0.165	0.206	0.177	0.328	0.268	0.218	0.174	0.153	0.198	0.212	0.212	0.244	0.12	0.259	0.19	0.333	0.395	0.239	0.119
463.141	0.491	0.4	0.342	0.41	0.493	0.289	0.416	0.408	0.385	0.337	0.312	0.103	0.269	0.135	0.213	0.171	0.126	0.121	0.14	0.326	0.307	0.186	0.132	0.151	0.159	0.142	0.191	0.139	0.195	0.191	0.153	0.197	0.161	0.311	0.244	0.207	0.16	0.135	0.18	0.176	0.194	0.223	0.112	0.243	0.176	0.305	0.355	0.218	0.112
463.894	0.464	0.406	0.332	0.387	0.465	0.323	0.426	0.443	0.395	0.343	0.317	0.102	0.268	0.13	0.196	0.162	0.123	0.113	0.141	0.324	0.316	0.187	0.131	0.151	0.153	0.14	0.185	0.136	0.183	0.181	0.152	0.187	0.158	0.302	0.247	0.203	0.154	0.134	0.176	0.164	0.195	0.219	0.11	0.232	0.171	0.295	0.375	0.211	0.11
464.66	0.526	0.435	0.379	0.441	0.52	0.347	0.49	0.477	0.424	0.371	0.342	0.104	0.268	0.132	0.205	0.161	0.123	0.117	0.141	0.322	0.305	0.182	0.138	0.154	0.152	0.139	0.184	0.137	0.186	0.174	0.154	0.19	0.155	0.296	0.252	0.199	0.153	0.139	0.179	0.187	0.199	0.208	0.109	0.234	0.179	0.296	0.367	0.213	0.111
465.444	0.466	0.42	0.327	0.39	0.448	0.323	0.422	0.417	0.396	0.341	0.307	0.106	0.265	0.13	0.207	0.162	0.13	0.114	0.141	0.318	0.315	0.184	0.125	0.15	0.152	0.14	0.183	0.135	0.186	0.185	0.146	0.185	0.155	0.308	0.236	0.206	0.151	0.134	0.178	0.17	0.183	0.209	0.109	0.237	0.168	0.288	0.345	0.22	0.106
466.228	0.473	0.411	0.33	0.379	0.462	0.308	0.415	0.441	0.397	0.336	0.307	0.102	0.266	0.133	0.208	0.16	0.122	0.114	0.137	0.317	0.298	0.178	0.119	0.15	0.147	0.138	0.184	0.136	0.191	0.177	0.149	0.184	0.154	0.306	0.241	0.202	0.148	0.133	0.175	0.179	0.194	0.203	0.108	0.231	0.157	0.289	0.355	0.208	0.104
466.98	0.513	0.431	0.373	0.404	0.486	0.332	0.482	0.478	0.425	0.375	0.334	0.107	0.285	0.148	0.226	0.174	0.139	0.126	0.156	0.327	0.333	0.2	0.149	0.159	0.174	0.149	0.198	0.146	0.2	0.187	0.16	0.197	0.171	0.326	0.257	0.216	0.17	0.157	0.183	0.192	0.207	0.227	0.115	0.25	0.184	0.309	0.383	0.225	0.116
467.731	0.473	0.419	0.353	0.391	0.518	0.329	0.442	0.441	0.399	0.349	0.308	0.102	0.261	0.132	0.202	0.159	0.126	0.11	0.147	0.312	0.316	0.181	0.121	0.146	0.149	0.142	0.187	0.137	0.184	0.184	0.146	0.187	0.155	0.306	0.243	0.203	0.15	0.133	0.169	0.175	0.188	0.209	0.109	0.231	0.163	0.282	0.36	0.202	0.108
468.466	0.486	0.412	0.351	0.399	0.458	0.332	0.419	0.415	0.415	0.353	0.316	0.105	0.262	0.131	0.207	0.164	0.124	0.114	0.141	0.306	0.306	0.181	0.127	0.146	0.148	0.137	0.181	0.137	0.183	0.175	0.15	0.184	0.156	0.301	0.246	0.199	0.147	0.136	0.172	0.164	0.186	0.206	0.109	0.24	0.158	0.275	0.355	0.209	0.112
469.218	0.514	0.437	0.368	0.441	0.503	0.347	0.452	0.475	0.426	0.372	0.322	0.111	0.281	0.143	0.222	0.169	0.138	0.133	0.153	0.32	0.335	0.193	0.134	0.158	0.163	0.143	0.197	0.147	0.198	0.191	0.164	0.198	0.169	0.31	0.263	0.21	0.165	0.145	0.183	0.202	0.2	0.211	0.114	0.251	0.184	0.305	0.368	0.216	0.12
469.969	0.457	0.405	0.33	0.383	0.469	0.322	0.416	0.438	0.407	0.343	0.302	0.099	0.261	0.131	0.21	0.156	0.123	0.118	0.141	0.304	0.302	0.18	0.129	0.146	0.15	0.14	0.179	0.135	0.184	0.177	0.153	0.18	0.154	0.299	0.242	0.21	0.157	0.132	0.17	0.173	0.197	0.197	0.106	0.238	0.167	0.275	0.334	0.203	0.112
470.721	0.506	0.434	0.362	0.421	0.494	0.343	0.439	0.434	0.425	0.366	0.314	0.101	0.263	0.129	0.205	0.158	0.125	0.114	0.137	0.301	0.304	0.173	0.128	0.144	0.148	0.138	0.182	0.134	0.181	0.183	0.144	0.181	0.153	0.297	0.232	0.206	0.14	0.131	0.168	0.154	0.186	0.192	0.108	0.235	0.156	0.275	0.366	0.203	0.115
471.489	0.503	0.44	0.367	0.453	0.513	0.339	0.469	0.452	0.431	0.373	0.316	0.101	0.252	0.135	0.194	0.158	0.121	0.111	0.133	0.295	0.258	0.176	0.123	0.143	0.142	0.137	0.177	0.131	0.179	0.184	0.145	0.176	0.153	0.293	0.24	0.204	0.149	0.132	0.169	0.162	0.177	0.203	0.105	0.231	0.156	0.279	0.341	0.204	0.112
472.225	0.465	0.411	0.348	0.406	0.474	0.328	0.447	0.454	0.402	0.354	0.296	0.101	0.256	0.132	0.204	0.158	0.124	0.118	0.134	0.297	0.294	0.176	0.125	0.148	0.147	0.14	0.188	0.137	0.186	0.183	0.148	0.179	0.155	0.289	0.227	0.203	0.152	0.13	0.163	0.175	0.183	0.196	0.107	0.234	0.168	0.286	0.348	0.199	0.106
472.976	0.505	0.428	0.386	0.448	0.499	0.365	0.444	0.458	0.432	0.365	0.32	0.103	0.256	0.134	0.201	0.161	0.125	0.109	0.141	0.294	0.3	0.183	0.132	0.144	0.148	0.14	0.185	0.138	0.179	0.19	0.157	0.179	0.153	0.293	0.236	0.201	0.151	0.131	0.167	0.16	0.184	0.196	0.107	0.237	0.166	0.279	0.34	0.204	0.11
473.748	0.49	0.436	0.371	0.458	0.542	0.352	0.459	0.467	0.418	0.366	0.334	0.097	0.256	0.135	0.202	0.158	0.122	0.111	0.138	0.292	0.295	0.175	0.115	0.142	0.145	0.139	0.18	0.137	0.181	0.181	0.15	0.176	0.151	0.287	0.221	0.203	0.145	0.133	0.165	0.151	0.185	0.187	0.105	0.227	0.175	0.277	0.325	0.197	0.107
474.483	0.492	0.439	0.381	0.435	0.557	0.342	0.471	0.461	0.428	0.374	0.312	0.101	0.253	0.129	0.204	0.159	0.12	0.115	0.134	0.288	0.281	0.176	0.125	0.142	0.147	0.139	0.176	0.139	0.182	0.18	0.147	0.174	0.152	0.289	0.225	0.198	0.145	0.133	0.172	0.163	0.178	0.186	0.105	0.23	0.154	0.266	0.331	0.199	0.11
475.214	0.505	0.452	0.371	0.441	0.528	0.34	0.455	0.433	0.428	0.359	0.319	0.109	0.267	0.144	0.223	0.172	0.134	0.132	0.149	0.304	0.324	0.192	0.148	0.152	0.167	0.151	0.198	0.146	0.196	0.199	0.158	0.187	0.162	0.312	0.252	0.21	0.163	0.155	0.182	0.192	0.195	0.203	0.113	0.243	0.172	0.292	0.366	0.218	0.118
475.965	0.466	0.413	0.367	0.382	0.454	0.34	0.417	0.442	0.399	0.344	0.304	0.105	0.245	0.133	0.205	0.164	0.125	0.116	0.135	0.292	0.304	0.183	0.137	0.142	0.147	0.142	0.185	0.139	0.183	0.194	0.151	0.177	0.148	0.296	0.223	0.201	0.145	0.135	0.168	0.167	0.179	0.185	0.108	0.237	0.154	0.276	0.338	0.201	0.107
476.717	0.48	0.409	0.325	0.381	0.48	0.296	0.417	0.437	0.403	0.345	0.295	0.101	0.243	0.129	0.208	0.159	0.127	0.117	0.137	0.291	0.283	0.177	0.13	0.145	0.144	0.14	0.182	0.137	0.176	0.192	0.153	0.175	0.149	0.292	0.222	0.201	0.147	0.136	0.165	0.158	0.183	0.189	0.107	0.239	0.162	0.279	0.331	0.199	0.109
477.485	0.518	0.434	0.368	0.429	0.498	0.361	0.449	0.466	0.432	0.375	0.335	0.101	0.242	0.131	0.2	0.155	0.124	0.113	0.132	0.291	0.287	0.176	0.127	0.144	0.149	0.14	0.181	0.14	0.179	0.187	0.147	0.176	0.147	0.285	0.225	0.199	0.146	0.14	0.164	0.176	0.179	0.183	0.109	0.239	0.155	0.268	0.339	0.198	0.114
478.237	0.454	0.419	0.339	0.38	0.513	0.298	0.414	0.414	0.41	0.339	0.29	0.113	0.254	0.142	0.221	0.173	0.138	0.129	0.149	0.302	0.332	0.193	0.151	0.15	0.159	0.149	0.191	0.148	0.192	0.205	0.165	0.19	0.159	0.317	0.256	0.218	0.166	0.157	0.184	0.179	0.192	0.202	0.116	0.26	0.193	0.302	0.37	0.215	0.12
478.988	0.483	0.433	0.386	0.391	0.525	0.345	0.46	0.467	0.434	0.362	0.316	0.108	0.257	0.142	0.213	0.17	0.138	0.134	0.153	0.298	0.34	0.192	0.147	0.151	0.154	0.147	0.191	0.148	0.194	0.197	0.168	0.189	0.158	0.306	0.238	0.215	0.16	0.147	0.18	0.173	0.188	0.199	0.114	0.256	0.182	0.304	0.356	0.214	0.12
479.737	0.509	0.436	0.375	0.415	0.523	0.336	0.435	0.486	0.429	0.362	0.316	0.097	0.241	0.128	0.199	0.157	0.123	0.114	0.132	0.287	0.282	0.176	0.117	0.141	0.144	0.141	0.181	0.136	0.18	0.187	0.15	0.17	0.145	0.287	0.218	0.199	0.144	0.134	0.166	0.166	0.179	0.184	0.105	0.235	0.155	0.268	0.329	0.197	0.109
480.488	0.472	0.413	0.34	0.383	0.488	0.312	0.437	0.449	0.419	0.336	0.29	0.1	0.241	0.134	0.198	0.153	0.126	0.117	0.133	0.285	0.283	0.176	0.132	0.137	0.144	0.14	0.175	0.14	0.178	0.184	0.147	0.17	0.148	0.292	0.224	0.199	0.147	0.133	0.167	0.154	0.171	0.182	0.103	0.239	0.15	0.276	0.316	0.195	0.107
481.247	0.457	0.403	0.325	0.382	0.46	0.291	0.402	0.399	0.383	0.334	0.283	0.1	0.231	0.126	0.189	0.155	0.124	0.115	0.13	0.285	0.269	0.179	0.114	0.14	0.141	0.141	0.175	0.137	0.179	0.19	0.15	0.17	0.144	0.281	0.216	0.2	0.136	0.128	0.162	0.146	0.178	0.178	0.105	0.235	0.147	0.264	0.326	0.19	0.108
481.992	0.513	0.447	0.364	0.444	0.538	0.338	0.448	0.482	0.457	0.353	0.321	0.1	0.23	0.131	0.189	0.152	0.126	0.109	0.133	0.288	0.27	0.17	0.123	0.137	0.137	0.139	0.171	0.137	0.178	0.186	0.147	0.171	0.139	0.28	0.22	0.203	0.147	0.136	0.164	0.155	0.173	0.177	0.107	0.229	0.151	0.269	0.311	0.191	0.103
482.745	0.473	0.419	0.346	0.372	0.542	0.3	0.415	0.429	0.402	0.342	0.286	0.1	0.233	0.126	0.199	0.154	0.121	0.11	0.136	0.288	0.293	0.18	0.128	0.141	0.141	0.143	0.175	0.137	0.179	0.19	0.152	0.172	0.143	0.287	0.225	0.199	0.143	0.135	0.169	0.153	0.173	0.177	0.107	0.241	0.157	0.276	0.331	0.196	0.109
483.528	0.498	0.45	0.365	0.443	0.541	0.343	0.445	0.463	0.418	0.356	0.318	0.098	0.234	0.128	0.193	0.154	0.121	0.113	0.129	0.285	0.273	0.175	0.132	0.137	0.136	0.141	0.174	0.136	0.181	0.185	0.149	0.168	0.145	0.283	0.219	0.193	0.135	0.13	0.167	0.157	0.174	0.174	0.104	0.238	0.152	0.268	0.315	0.191	0.105
484.308	0.534	0.451	0.356	0.423	0.546	0.34	0.444	0.467	0.419	0.372	0.312	0.098	0.229	0.124	0.192	0.147	0.123	0.11	0.132	0.285	0.281	0.176	0.112	0.136	0.136	0.143	0.169	0.136	0.18	0.185	0.148	0.166	0.144	0.28	0.219	0.194	0.138	0.128	0.163	0.148	0.168	0.174	0.106	0.229	0.159	0.267	0.315	0.193	0.105
485.148	0.47	0.445	0.35	0.398	0.498	0.326	0.428	0.453	0.409	0.362	0.304	0.098	0.224	0.127	0.188	0.145	0.12	0.107	0.128	0.285	0.26	0.173	0.119	0.135	0.139	0.139	0.17	0.135	0.173	0.182	0.146	0.159	0.141	0.273	0.206	0.192	0.139	0.127	0.162	0.142	0.168	0.181	0.105	0.228	0.146	0.27	0.318	0.192	0.105
485.909	0.458	0.422	0.334	0.383	0.535	0.321	0.398	0.416	0.39	0.345	0.298	0.106	0.233	0.139	0.209	0.158	0.136	0.126	0.152	0.295	0.294	0.183	0.135	0.144	0.149	0.15	0.185	0.147	0.188	0.193	0.163	0.18	0.153	0.29	0.234	0.211	0.153	0.14	0.177	0.17	0.18	0.187	0.112	0.255	0.169	0.288	0.333	0.205	0.115
486.694	0.496	0.447	0.365	0.455	0.551	0.338	0.442	0.437	0.411	0.35	0.303	0.104	0.224	0.132	0.199	0.148	0.126	0.118	0.128	0.294	0.282	0.178	0.127	0.138	0.141	0.145	0.177	0.141	0.181	0.198	0.159	0.173	0.144	0.286	0.222	0.203	0.142	0.13	0.17	0.157	0.178	0.179	0.109	0.24	0.155	0.274	0.323	0.197	0.105
487.477	0.497	0.442	0.355	0.419	0.512	0.336	0.451	0.453	0.441	0.362	0.317	0.097	0.228	0.13	0.187	0.145	0.125	0.109	0.129	0.285	0.258	0.164	0.121	0.134	0.136	0.14	0.174	0.136	0.182	0.195	0.151	0.163	0.143	0.273	0.207	0.193	0.14	0.124	0.158	0.156	0.169	0.164	0.104	0.226	0.166	0.267	0.302	0.187	0.106
488.298	0.502	0.451	0.368	0.42	0.522	0.322	0.442	0.449	0.431	0.365	0.316	0.102	0.22	0.126	0.187	0.142	0.12	0.112	0.126	0.288	0.28	0.173	0.113	0.134	0.134	0.139	0.171	0.135	0.172	0.178	0.149	0.16	0.139	0.276	0.209	0.203	0.14	0.124	0.169	0.151	0.17	0.165	0.104	0.245	0.159	0.263	0.316	0.186	0.109
489.012	0.454	0.415	0.33	0.388	0.476	0.316	0.389	0.41	0.401	0.339	0.297	0.103	0.215	0.133	0.185	0.143	0.126	0.108	0.13	0.287	0.268	0.166	0.112	0.137	0.136	0.139	0.173	0.135	0.172	0.18	0.152	0.155	0.137	0.268	0.208	0.197	0.136	0.13	0.164	0.15	0.166	0.169	0.106	0.232	0.157	0.271	0.308	0.186	0.105
489.812	0.502	0.442	0.357	0.413	0.523	0.334	0.429	0.465	0.437	0.355	0.317	0.098	0.213	0.126	0.184	0.142	0.124	0.103	0.131	0.287	0.252	0.169	0.126	0.132	0.132	0.141	0.172	0.136	0.176	0.185	0.147	0.159	0.136	0.278	0.2	0.201	0.134	0.128	0.16	0.152	0.17	0.168	0.105	0.224	0.155	0.26	0.299	0.188	0.103
490.564	0.441	0.421	0.324	0.367	0.482	0.31	0.406	0.42	0.398	0.341	0.288	0.099	0.211	0.124	0.18	0.139	0.126	0.103	0.126	0.282	0.264	0.169	0.117	0.134	0.134	0.14	0.173	0.136	0.17	0.175	0.146	0.157	0.139	0.271	0.208	0.193	0.138	0.129	0.168	0.162	0.167	0.166	0.105	0.231	0.136	0.26	0.315	0.185	0.106
491.315	0.503	0.437	0.347	0.411	0.508	0.352	0.445	0.447	0.436	0.359	0.305	0.101	0.212	0.123	0.184	0.143	0.121	0.105	0.126	0.284	0.256	0.165	0.117	0.132	0.131	0.143	0.175	0.135	0.184	0.183	0.152	0.16	0.137	0.267	0.207	0.196	0.14	0.131	0.168	0.149	0.165	0.168	0.102	0.23	0.169	0.259	0.305	0.184	0.105
492.067	0.507	0.444	0.362	0.428	0.489	0.323	0.441	0.445	0.421	0.36	0.311	0.108	0.228	0.137	0.204	0.155	0.137	0.115	0.142	0.298	0.297	0.182	0.141	0.139	0.14	0.149	0.183	0.146	0.19	0.197	0.171	0.172	0.15	0.289	0.243	0.214	0.158	0.147	0.181	0.172	0.179	0.182	0.111	0.247	0.178	0.284	0.322	0.2	0.112
492.851	0.459	0.413	0.324	0.384	0.465	0.307	0.41	0.44	0.403	0.345	0.281	0.106	0.219	0.138	0.207	0.157	0.136	0.123	0.142	0.297	0.29	0.182	0.136	0.141	0.149	0.15	0.186	0.146	0.188	0.203	0.167	0.171	0.147	0.288	0.228	0.206	0.157	0.148	0.179	0.164	0.18	0.184	0.113	0.252	0.173	0.283	0.321	0.202	0.112
493.584	0.464	0.402	0.327	0.364	0.479	0.293	0.403	0.431	0.398	0.345	0.28	0.107	0.222	0.142	0.202	0.155	0.14	0.12	0.142	0.296	0.277	0.181	0.142	0.14	0.151	0.15	0.183	0.143	0.188	0.2	0.171	0.168	0.148	0.285	0.229	0.214	0.154	0.148	0.176	0.169	0.178	0.182	0.114	0.249	0.17	0.28	0.333	0.198	0.117
494.339	0.492	0.45	0.351	0.43	0.501	0.314	0.433	0.424	0.412	0.355	0.311	0.101	0.207	0.12	0.18	0.141	0.126	0.099	0.125	0.28	0.236	0.162	0.119	0.128	0.134	0.136	0.166	0.133	0.177	0.177	0.149	0.155	0.139	0.268	0.214	0.194	0.133	0.127	0.163	0.156	0.159	0.163	0.102	0.218	0.138	0.271	0.282	0.18	0.106
495.073	0.493	0.434	0.357	0.418	0.517	0.352	0.409	0.455	0.433	0.35	0.307	0.098	0.2	0.123	0.185	0.144	0.129	0.107	0.126	0.286	0.24	0.167	0.107	0.13	0.132	0.141	0.167	0.134	0.178	0.181	0.151	0.161	0.139	0.271	0.213	0.2	0.133	0.122	0.165	0.149	0.159	0.164	0.106	0.235	0.166	0.269	0.292	0.183	0.1
495.856	0.452	0.405	0.331	0.377	0.457	0.295	0.397	0.423	0.387	0.332	0.267	0.095	0.202	0.12	0.178	0.139	0.124	0.103	0.126	0.278	0.243	0.16	0.118	0.129	0.126	0.138	0.168	0.136	0.173	0.18	0.153	0.155	0.132	0.262	0.201	0.195	0.135	0.125	0.166	0.142	0.153	0.166	0.102	0.223	0.148	0.256	0.29	0.178	0.103
496.576	0.506	0.45	0.359	0.415	0.476	0.33	0.424	0.432	0.414	0.352	0.311	0.098	0.203	0.123	0.175	0.137	0.122	0.1	0.127	0.283	0.253	0.165	0.112	0.13	0.134	0.135	0.172	0.133	0.173	0.176	0.151	0.155	0.135	0.264	0.21	0.2	0.141	0.129	0.166	0.138	0.162	0.167	0.105	0.234	0.16	0.274	0.302	0.181	0.103
497.359	0.46	0.381	0.311	0.352	0.453	0.287	0.375	0.405	0.38	0.321	0.283	0.107	0.215	0.138	0.197	0.149	0.138	0.112	0.142	0.294	0.269	0.173	0.129	0.138	0.14	0.146	0.178	0.141	0.185	0.186	0.161	0.166	0.142	0.274	0.22	0.207	0.148	0.144	0.177	0.155	0.169	0.172	0.113	0.243	0.171	0.276	0.301	0.191	0.109
498.093	0.503	0.439	0.348	0.414	0.484	0.334	0.424	0.442	0.422	0.361	0.3	0.108	0.212	0.139	0.2	0.147	0.136	0.114	0.141	0.295	0.271	0.175	0.141	0.139	0.147	0.145	0.183	0.143	0.184	0.196	0.165	0.165	0.147	0.281	0.232	0.22	0.151	0.148	0.18	0.158	0.172	0.183	0.113	0.246	0.162	0.288	0.317	0.194	0.111
498.878	0.481	0.446	0.362	0.414	0.451	0.323	0.438	0.445	0.419	0.347	0.303	0.096	0.195	0.126	0.187	0.144	0.126	0.103	0.122	0.287	0.253	0.162	0.117	0.131	0.13	0.135	0.167	0.135	0.167	0.176	0.152	0.151	0.134	0.261	0.209	0.199	0.135	0.131	0.162	0.161	0.162	0.159	0.105	0.228	0.169	0.267	0.284	0.176	0.103
499.646	0.467	0.417	0.338	0.385	0.462	0.289	0.394	0.392	0.41	0.338	0.29	0.103	0.207	0.136	0.193	0.152	0.14	0.118	0.139	0.292	0.273	0.173	0.133	0.137	0.142	0.145	0.183	0.143	0.179	0.185	0.164	0.164	0.145	0.282	0.227	0.208	0.152	0.144	0.179	0.17	0.174	0.178	0.11	0.236	0.172	0.288	0.313	0.192	0.112
500.412	0.48	0.424	0.324	0.363	0.466	0.301	0.4	0.409	0.385	0.34	0.297	0.105	0.209	0.139	0.199	0.152	0.142	0.115	0.145	0.288	0.265	0.173	0.14	0.139	0.143	0.145	0.181	0.141	0.184	0.184	0.165	0.163	0.143	0.276	0.225	0.212	0.149	0.139	0.174	0.162	0.166	0.173	0.113	0.242	0.169	0.279	0.311	0.191	0.114
501.18	0.501	0.436	0.35	0.414	0.491	0.336	0.425	0.43	0.419	0.365	0.318	0.094	0.199	0.125	0.18	0.141	0.124	0.101	0.126	0.281	0.238	0.161	0.114	0.127	0.13	0.135	0.166	0.132	0.167	0.182	0.152	0.152	0.134	0.265	0.208	0.208	0.138	0.122	0.162	0.137	0.163	0.162	0.104	0.224	0.158	0.266	0.276	0.179	0.102
501.98	0.448	0.41	0.315	0.354	0.444	0.293	0.388	0.405	0.38	0.339	0.284	0.098	0.193	0.126	0.173	0.139	0.127	0.102	0.125	0.28	0.235	0.157	0.116	0.128	0.133	0.138	0.167	0.136	0.173	0.178	0.153	0.155	0.136	0.26	0.204	0.196	0.136	0.124	0.157	0.144	0.155	0.158	0.104	0.223	0.152	0.259	0.287	0.175	0.106
502.732	0.494	0.441	0.334	0.402	0.515	0.328	0.429	0.461	0.428	0.359	0.32	0.098	0.197	0.121	0.176	0.136	0.121	0.1	0.127	0.274	0.239	0.156	0.108	0.13	0.125	0.133	0.166	0.131	0.172	0.176	0.149	0.15	0.13	0.261	0.206	0.204	0.144	0.133	0.163	0.133	0.158	0.159	0.104	0.226	0.153	0.269	0.301	0.177	0.106
503.484	0.513	0.441	0.354	0.403	0.54	0.331	0.414	0.445	0.417	0.361	0.321	0.096	0.192	0.123	0.176	0.137	0.125	0.096	0.126	0.277	0.226	0.157	0.121	0.127	0.127	0.133	0.165	0.132	0.167	0.17	0.151	0.149	0.13	0.249	0.202	0.199	0.13	0.124	0.156	0.135	0.149	0.155	0.102	0.224	0.139	0.256	0.271	0.172	0.101
504.35	0.483	0.428	0.338	0.4	0.498	0.334	0.409	0.453	0.404	0.353	0.317	0.096	0.19	0.124	0.173	0.137	0.127	0.097	0.125	0.274	0.23	0.156	0.112	0.129	0.128	0.136	0.166	0.131	0.167	0.176	0.146	0.151	0.132	0.253	0.2	0.197	0.143	0.129	0.159	0.141	0.154	0.149	0.103	0.22	0.142	0.263	0.265	0.168	0.101
505.067	0.477	0.422	0.346	0.408	0.496	0.333	0.42	0.432	0.428	0.364	0.326	0.1	0.191	0.125	0.176	0.139	0.127	0.104	0.116	0.274	0.225	0.154	0.128	0.128	0.123	0.134	0.167	0.131	0.17	0.175	0.146	0.146	0.131	0.261	0.2	0.198	0.131	0.123	0.162	0.126	0.154	0.16	0.102	0.224	0.157	0.262	0.276	0.174	0.102
505.819	0.483	0.442	0.348	0.409	0.466	0.324	0.413	0.44	0.405	0.357	0.314	0.099	0.187	0.12	0.171	0.137	0.124	0.104	0.123	0.275	0.227	0.152	0.107	0.129	0.124	0.13	0.162	0.134	0.166	0.165	0.15	0.145	0.131	0.263	0.201	0.19	0.132	0.126	0.156	0.144	0.154	0.16	0.104	0.221	0.146	0.253	0.277	0.173	0.102
506.567	0.498	0.424	0.347	0.417	0.507	0.308	0.401	0.44	0.403	0.352	0.313	0.098	0.192	0.125	0.17	0.136	0.128	0.101	0.122	0.268	0.232	0.152	0.113	0.129	0.126	0.135	0.167	0.132	0.167	0.168	0.147	0.145	0.134	0.254	0.192	0.2	0.133	0.13	0.154	0.136	0.149	0.157	0.104	0.216	0.152	0.26	0.255	0.171	0.099
507.321	0.455	0.413	0.325	0.369	0.456	0.279	0.382	0.387	0.388	0.331	0.295	0.097	0.179	0.12	0.168	0.136	0.126	0.093	0.121	0.273	0.23	0.149	0.108	0.13	0.124	0.133	0.17	0.13	0.169	0.169	0.146	0.145	0.134	0.256	0.198	0.196	0.136	0.126	0.159	0.135	0.155	0.15	0.102	0.22	0.155	0.249	0.267	0.171	0.101
508.062	0.458	0.407	0.303	0.359	0.43	0.275	0.384	0.399	0.391	0.334	0.279	0.095	0.181	0.124	0.17	0.135	0.122	0.101	0.123	0.268	0.22	0.147	0.115	0.127	0.123	0.132	0.162	0.129	0.171	0.17	0.153	0.148	0.127	0.253	0.195	0.197	0.134	0.125	0.156	0.131	0.148	0.15	0.102	0.224	0.148	0.254	0.275	0.168	0.103
508.821	0.462	0.4	0.331	0.386	0.461	0.307	0.369	0.407	0.387	0.335	0.288	0.106	0.197	0.136	0.184	0.146	0.14	0.118	0.138	0.279	0.261	0.163	0.129	0.137	0.138	0.142	0.177	0.141	0.178	0.184	0.151	0.157	0.138	0.277	0.222	0.209	0.151	0.146	0.178	0.145	0.161	0.166	0.111	0.233	0.164	0.281	0.278	0.18	0.11
509.56	0.445	0.391	0.313	0.353	0.423	0.335	0.388	0.4	0.385	0.334	0.295	0.109	0.197	0.133	0.188	0.144	0.139	0.116	0.139	0.279	0.248	0.167	0.143	0.135	0.136	0.143	0.178	0.142	0.176	0.182	0.159	0.157	0.142	0.278	0.222	0.217	0.151	0.145	0.175	0.148	0.167	0.163	0.111	0.233	0.164	0.281	0.282	0.187	0.115
510.31	0.466	0.404	0.323	0.37	0.424	0.282	0.374	0.386	0.383	0.33	0.299	0.095	0.185	0.122	0.163	0.134	0.124	0.098	0.128	0.262	0.218	0.145	0.106	0.127	0.12	0.134	0.165	0.13	0.164	0.169	0.15	0.147	0.129	0.262	0.2	0.196	0.14	0.126	0.158	0.125	0.148	0.149	0.102	0.216	0.17	0.261	0.258	0.165	0.097
511.063	0.456	0.394	0.32	0.37	0.445	0.303	0.383	0.394	0.381	0.327	0.295	0.104	0.191	0.139	0.181	0.142	0.14	0.111	0.14	0.272	0.229	0.16	0.131	0.134	0.136	0.141	0.178	0.139	0.176	0.177	0.157	0.155	0.137	0.274	0.214	0.208	0.146	0.141	0.171	0.139	0.163	0.158	0.109	0.229	0.171	0.274	0.274	0.18	0.108
511.862	0.491	0.423	0.342	0.379	0.494	0.326	0.41	0.435	0.414	0.353	0.317	0.104	0.193	0.134	0.178	0.144	0.137	0.112	0.137	0.269	0.241	0.16	0.132	0.133	0.13	0.141	0.176	0.138	0.18	0.176	0.159	0.154	0.139	0.269	0.221	0.208	0.153	0.138	0.17	0.142	0.158	0.162	0.108	0.228	0.167	0.274	0.273	0.178	0.108
512.595	0.489	0.427	0.352	0.389	0.472	0.304	0.392	0.432	0.399	0.349	0.317	0.104	0.187	0.134	0.176	0.143	0.14	0.11	0.142	0.27	0.245	0.162	0.129	0.132	0.133	0.14	0.176	0.139	0.179	0.178	0.162	0.157	0.139	0.264	0.208	0.208	0.147	0.141	0.169	0.138	0.16	0.16	0.109	0.23	0.159	0.27	0.276	0.178	0.11
513.334	0.474	0.414	0.318	0.36	0.459	0.291	0.372	0.388	0.386	0.325	0.277	0.103	0.183	0.126	0.184	0.139	0.137	0.109	0.136	0.267	0.239	0.157	0.13	0.132	0.129	0.138	0.177	0.138	0.175	0.175	0.157	0.154	0.136	0.267	0.216	0.207	0.152	0.139	0.17	0.148	0.158	0.158	0.107	0.234	0.162	0.269	0.261	0.175	0.113
514.069	0.461	0.405	0.321	0.351	0.467	0.312	0.386	0.39	0.387	0.333	0.3	0.095	0.172	0.118	0.16	0.124	0.122	0.093	0.116	0.257	0.206	0.145	0.117	0.12	0.125	0.132	0.161	0.13	0.166	0.168	0.154	0.14	0.125	0.253	0.193	0.194	0.131	0.123	0.159	0.118	0.147	0.144	0.099	0.209	0.151	0.245	0.245	0.164	0.098
514.85	0.493	0.428	0.336	0.398	0.501	0.345	0.41	0.426	0.413	0.359	0.32	0.096	0.178	0.118	0.162	0.124	0.121	0.097	0.123	0.257	0.209	0.142	0.115	0.126	0.118	0.133	0.161	0.13	0.166	0.169	0.148	0.144	0.127	0.25	0.189	0.191	0.13	0.13	0.155	0.115	0.142	0.141	0.101	0.215	0.149	0.244	0.24	0.163	0.1
515.65	0.492	0.428	0.338	0.397	0.491	0.327	0.398	0.414	0.407	0.356	0.309	0.094	0.169	0.12	0.161	0.127	0.121	0.097	0.125	0.252	0.204	0.14	0.119	0.124	0.118	0.131	0.161	0.129	0.165	0.169	0.149	0.144	0.129	0.251	0.183	0.194	0.127	0.13	0.15	0.125	0.145	0.145	0.099	0.211	0.149	0.25	0.234	0.159	0.096
516.419	0.482	0.431	0.348	0.4	0.528	0.332	0.399	0.411	0.397	0.354	0.317	0.095	0.166	0.125	0.159	0.128	0.128	0.096	0.127	0.253	0.215	0.145	0.104	0.127	0.124	0.134	0.165	0.129	0.165	0.175	0.151	0.142	0.126	0.248	0.19	0.194	0.132	0.123	0.156	0.115	0.147	0.145	0.1	0.211	0.149	0.239	0.237	0.163	0.1
517.234	0.502	0.442	0.35	0.385	0.5	0.302	0.415	0.427	0.418	0.35	0.311	0.104	0.183	0.133	0.178	0.138	0.135	0.11	0.135	0.258	0.225	0.157	0.147	0.136	0.131	0.136	0.172	0.137	0.18	0.179	0.161	0.152	0.136	0.259	0.197	0.198	0.146	0.145	0.167	0.128	0.158	0.151	0.108	0.226	0.168	0.266	0.249	0.176	0.105
517.986	0.433	0.397	0.314	0.369	0.466	0.268	0.374	0.415	0.373	0.336	0.294	0.106	0.183	0.128	0.174	0.135	0.135	0.112	0.136	0.263	0.229	0.154	0.137	0.136	0.136	0.14	0.177	0.14	0.178	0.173	0.16	0.153	0.136	0.265	0.199	0.207	0.15	0.145	0.167	0.139	0.153	0.151	0.108	0.225	0.174	0.265	0.256	0.17	0.107
518.738	0.479	0.431	0.332	0.381	0.501	0.305	0.397	0.416	0.406	0.346	0.315	0.1	0.179	0.133	0.172	0.132	0.131	0.103	0.133	0.26	0.227	0.155	0.118	0.134	0.134	0.138	0.172	0.137	0.174	0.182	0.161	0.152	0.136	0.264	0.196	0.205	0.149	0.135	0.168	0.13	0.155	0.147	0.108	0.226	0.173	0.258	0.252	0.169	0.106
519.489	0.477	0.433	0.339	0.386	0.497	0.305	0.405	0.414	0.407	0.342	0.31	0.091	0.169	0.121	0.155	0.122	0.118	0.097	0.121	0.245	0.224	0.136	0.115	0.127	0.121	0.134	0.158	0.132	0.168	0.168	0.149	0.143	0.123	0.25	0.185	0.193	0.127	0.129	0.153	0.113	0.149	0.134	0.101	0.213	0.157	0.25	0.235	0.159	0.097
520.241	0.504	0.423	0.335	0.391	0.47	0.313	0.395	0.419	0.401	0.341	0.317	0.095	0.165	0.114	0.154	0.117	0.119	0.091	0.118	0.241	0.195	0.137	0.107	0.12	0.113	0.129	0.158	0.126	0.161	0.166	0.148	0.136	0.121	0.245	0.18	0.194	0.131	0.126	0.157	0.112	0.147	0.139	0.1	0.208	0.145	0.238	0.234	0.157	0.1
520.991	0.442	0.422	0.311	0.366	0.428	0.289	0.374	0.396	0.36	0.324	0.285	0.103	0.177	0.133	0.175	0.131	0.135	0.104	0.139	0.254	0.228	0.154	0.136	0.129	0.129	0.137	0.171	0.138	0.173	0.171	0.154	0.15	0.136	0.258	0.199	0.197	0.139	0.149	0.164	0.133	0.151	0.149	0.108	0.225	0.17	0.252	0.244	0.167	0.106
521.741	0.445	0.405	0.311	0.362	0.459	0.288	0.372	0.39	0.363	0.321	0.285	0.103	0.173	0.132	0.175	0.131	0.132	0.108	0.138	0.25	0.223	0.151	0.125	0.127	0.134	0.137	0.174	0.14	0.176	0.175	0.16	0.148	0.134	0.252	0.19	0.198	0.141	0.133	0.164	0.125	0.147	0.142	0.104	0.226	0.147	0.255	0.246	0.164	0.107
522.51	0.461	0.435	0.332	0.38	0.464	0.297	0.398	0.428	0.412	0.336	0.309	0.103	0.181	0.131	0.168	0.132	0.135	0.108	0.134	0.253	0.236	0.152	0.131	0.131	0.131	0.14	0.174	0.143	0.176	0.174	0.161	0.15	0.134	0.26	0.194	0.207	0.148	0.143	0.167	0.138	0.156	0.146	0.109	0.226	0.174	0.261	0.246	0.168	0.109
523.326	0.479	0.427	0.332	0.398	0.494	0.32	0.388	0.408	0.403	0.335	0.306	0.1	0.168	0.131	0.171	0.134	0.135	0.107	0.136	0.252	0.214	0.149	0.131	0.13	0.132	0.138	0.17	0.137	0.174	0.168	0.161	0.152	0.134	0.258	0.19	0.202	0.139	0.136	0.166	0.127	0.153	0.142	0.108	0.22	0.165	0.247	0.236	0.164	0.107
524.078	0.478	0.427	0.346	0.391	0.454	0.319	0.389	0.414	0.396	0.339	0.316	0.102	0.172	0.133	0.166	0.128	0.133	0.106	0.135	0.249	0.226	0.15	0.124	0.131	0.131	0.139	0.172	0.14	0.175	0.175	0.163	0.151	0.135	0.256	0.195	0.206	0.14	0.138	0.164	0.127	0.152	0.146	0.106	0.22	0.151	0.249	0.246	0.17	0.106
524.83	0.453	0.402	0.304	0.345	0.407	0.274	0.357	0.384	0.381	0.318	0.285	0.103	0.169	0.131	0.167	0.128	0.133	0.108	0.137	0.248	0.216	0.145	0.13	0.127	0.13	0.136	0.168	0.135	0.169	0.176	0.158	0.144	0.129	0.255	0.187	0.197	0.143	0.14	0.165	0.126	0.154	0.144	0.108	0.213	0.166	0.244	0.232	0.165	0.105
525.581	0.468	0.45	0.333	0.384	0.512	0.312	0.405	0.425	0.387	0.34	0.311	0.103	0.173	0.128	0.174	0.129	0.134	0.104	0.14	0.25	0.224	0.152	0.127	0.128	0.127	0.137	0.172	0.138	0.179	0.177	0.161	0.148	0.131	0.257	0.192	0.201	0.139	0.134	0.162	0.136	0.148	0.139	0.107	0.222	0.157	0.249	0.239	0.167	0.108
526.333	0.461	0.441	0.34	0.39	0.497	0.293	0.404	0.431	0.394	0.338	0.311	0.102	0.172	0.128	0.17	0.125	0.132	0.108	0.137	0.246	0.218	0.15	0.129	0.129	0.128	0.138	0.172	0.136	0.174	0.176	0.163	0.147	0.134	0.258	0.19	0.202	0.145	0.138	0.162	0.13	0.152	0.139	0.106	0.225	0.158	0.249	0.235	0.164	0.108
527.068	0.483	0.433	0.334	0.403	0.501	0.296	0.409	0.445	0.4	0.342	0.308	0.101	0.166	0.132	0.167	0.132	0.131	0.108	0.138	0.247	0.224	0.147	0.125	0.128	0.129	0.136	0.172	0.139	0.173	0.174	0.163	0.148	0.132	0.252	0.187	0.203	0.145	0.14	0.162	0.13	0.15	0.141	0.108	0.215	0.154	0.245	0.229	0.162	0.104
527.82	0.431	0.408	0.311	0.364	0.458	0.272	0.385	0.385	0.366	0.314	0.274	0.097	0.163	0.131	0.169	0.13	0.131	0.105	0.136	0.243	0.22	0.147	0.132	0.129	0.132	0.134	0.167	0.136	0.169	0.174	0.154	0.148	0.13	0.246	0.187	0.201	0.141	0.144	0.161	0.129	0.149	0.145	0.105	0.214	0.159	0.235	0.232	0.161	0.106
528.571	0.475	0.429	0.331	0.395	0.499	0.302	0.399	0.422	0.378	0.338	0.308	0.097	0.155	0.117	0.154	0.114	0.115	0.092	0.119	0.236	0.194	0.132	0.11	0.12	0.114	0.128	0.159	0.131	0.162	0.159	0.147	0.137	0.119	0.239	0.173	0.188	0.126	0.12	0.154	0.102	0.14	0.121	0.099	0.199	0.152	0.223	0.205	0.148	0.101
529.323	0.425	0.409	0.301	0.347	0.445	0.307	0.366	0.394	0.354	0.313	0.289	0.103	0.168	0.132	0.17	0.13	0.131	0.108	0.139	0.245	0.212	0.145	0.123	0.127	0.13	0.136	0.171	0.139	0.176	0.173	0.161	0.145	0.131	0.255	0.187	0.205	0.143	0.139	0.158	0.121	0.153	0.138	0.108	0.215	0.162	0.245	0.231	0.162	0.108
530.073	0.45	0.412	0.314	0.337	0.464	0.26	0.364	0.396	0.358	0.313	0.278	0.1	0.171	0.133	0.165	0.127	0.132	0.107	0.134	0.245	0.22	0.149	0.126	0.126	0.123	0.131	0.169	0.139	0.179	0.176	0.16	0.144	0.129	0.252	0.183	0.202	0.143	0.136	0.164	0.127	0.15	0.143	0.108	0.211	0.159	0.235	0.225	0.162	0.107
530.826	0.467	0.43	0.335	0.398	0.516	0.304	0.418	0.413	0.392	0.331	0.307	0.102	0.167	0.131	0.172	0.126	0.131	0.105	0.136	0.249	0.212	0.146	0.13	0.125	0.128	0.132	0.17	0.138	0.175	0.17	0.159	0.146	0.127	0.248	0.19	0.195	0.142	0.134	0.162	0.117	0.149	0.133	0.107	0.215	0.16	0.243	0.227	0.163	0.107
531.577	0.472	0.438	0.34	0.391	0.513	0.309	0.402	0.418	0.378	0.323	0.297	0.094	0.15	0.115	0.153	0.117	0.119	0.092	0.118	0.239	0.198	0.134	0.107	0.116	0.113	0.126	0.154	0.129	0.159	0.158	0.143	0.136	0.124	0.234	0.167	0.188	0.12	0.122	0.147	0.11	0.137	0.122	0.1	0.198	0.144	0.217	0.203	0.146	0.097
532.329	0.442	0.412	0.31	0.362	0.452	0.266	0.349	0.381	0.367	0.308	0.289	0.094	0.15	0.115	0.149	0.113	0.117	0.092	0.121	0.239	0.189	0.13	0.109	0.118	0.113	0.126	0.155	0.129	0.165	0.158	0.141	0.134	0.119	0.227	0.161	0.184	0.123	0.121	0.149	0.114	0.136	0.131	0.097	0.19	0.15	0.216	0.212	0.145	0.097
533.066	0.428	0.421	0.313	0.34	0.442	0.284	0.358	0.408	0.359	0.316	0.288	0.097	0.158	0.131	0.167	0.126	0.134	0.105	0.135	0.249	0.216	0.141	0.126	0.128	0.135	0.133	0.173	0.136	0.172	0.174	0.159	0.147	0.129	0.243	0.179	0.202	0.135	0.136	0.161	0.126	0.149	0.138	0.106	0.21	0.166	0.235	0.222	0.159	0.105
533.816	0.475	0.445	0.329	0.369	0.479	0.325	0.395	0.417	0.398	0.337	0.307	0.103	0.158	0.129	0.164	0.125	0.131	0.106	0.136	0.25	0.201	0.142	0.121	0.124	0.125	0.136	0.163	0.138	0.172	0.176	0.158	0.146	0.127	0.244	0.18	0.201	0.139	0.135	0.164	0.115	0.146	0.136	0.107	0.208	0.158	0.224	0.213	0.159	0.105
534.567	0.41	0.419	0.314	0.348	0.43	0.287	0.371	0.384	0.372	0.321	0.284	0.093	0.149	0.116	0.151	0.113	0.121	0.091	0.118	0.239	0.194	0.131	0.108	0.118	0.113	0.127	0.156	0.127	0.165	0.166	0.152	0.134	0.119	0.226	0.163	0.186	0.125	0.124	0.152	0.101	0.134	0.13	0.099	0.19	0.135	0.212	0.197	0.145	0.1
535.319	0.437	0.417	0.309	0.361	0.48	0.275	0.359	0.367	0.356	0.316	0.277	0.093	0.145	0.115	0.147	0.112	0.12	0.094	0.123	0.238	0.188	0.129	0.108	0.114	0.112	0.125	0.154	0.129	0.163	0.158	0.149	0.129	0.121	0.229	0.167	0.182	0.128	0.118	0.149	0.096	0.135	0.125	0.099	0.187	0.144	0.21	0.204	0.143	0.094
536.07	0.447	0.418	0.31	0.364	0.433	0.271	0.356	0.38	0.363	0.31	0.284	0.102	0.158	0.128	0.163	0.123	0.131	0.101	0.135	0.246	0.211	0.141	0.13	0.123	0.13	0.134	0.164	0.138	0.173	0.17	0.157	0.147	0.13	0.232	0.178	0.195	0.136	0.141	0.161	0.125	0.144	0.135	0.102	0.2	0.154	0.215	0.215	0.155	0.105
536.822	0.474	0.455	0.343	0.398	0.467	0.296	0.379	0.391	0.392	0.327	0.297	0.093	0.147	0.113	0.147	0.111	0.118	0.095	0.12	0.236	0.184	0.134	0.101	0.115	0.111	0.127	0.153	0.127	0.16	0.163	0.141	0.132	0.118	0.221	0.161	0.183	0.119	0.123	0.144	0.108	0.131	0.124	0.096	0.187	0.134	0.212	0.193	0.141	0.095
537.637	0.417	0.415	0.305	0.326	0.436	0.26	0.362	0.376	0.353	0.312	0.28	0.101	0.155	0.126	0.158	0.119	0.129	0.103	0.136	0.248	0.207	0.139	0.126	0.125	0.129	0.136	0.165	0.137	0.173	0.178	0.159	0.144	0.127	0.238	0.174	0.19	0.14	0.137	0.158	0.12	0.152	0.136	0.105	0.191	0.157	0.221	0.216	0.156	0.101
538.393	0.46	0.448	0.343	0.392	0.485	0.298	0.382	0.43	0.384	0.337	0.297	0.099	0.154	0.128	0.161	0.118	0.126	0.103	0.131	0.249	0.209	0.144	0.121	0.123	0.13	0.13	0.166	0.136	0.169	0.171	0.155	0.141	0.128	0.235	0.169	0.198	0.137	0.143	0.162	0.126	0.145	0.129	0.105	0.188	0.164	0.217	0.21	0.149	0.102
539.145	0.415	0.399	0.317	0.373	0.439	0.271	0.36	0.39	0.358	0.315	0.286	0.098	0.151	0.127	0.158	0.121	0.127	0.107	0.132	0.242	0.208	0.14	0.128	0.126	0.122	0.135	0.169	0.138	0.17	0.174	0.154	0.143	0.129	0.236	0.174	0.2	0.135	0.135	0.154	0.115	0.142	0.133	0.106	0.186	0.154	0.223	0.209	0.151	0.104
540.001	0.418	0.407	0.314	0.354	0.431	0.283	0.38	0.389	0.368	0.312	0.275	0.1	0.154	0.132	0.157	0.122	0.133	0.106	0.132	0.248	0.21	0.141	0.123	0.124	0.127	0.133	0.171	0.138	0.175	0.167	0.155	0.14	0.129	0.233	0.174	0.191	0.138	0.136	0.156	0.113	0.145	0.134	0.104	0.189	0.148	0.212	0.207	0.149	0.104
540.757	0.475	0.436	0.353	0.411	0.515	0.276	0.392	0.437	0.385	0.338	0.307	0.099	0.155	0.128	0.152	0.116	0.131	0.107	0.135	0.244	0.208	0.14	0.114	0.123	0.128	0.134	0.167	0.137	0.171	0.164	0.155	0.145	0.128	0.231	0.17	0.194	0.136	0.135	0.155	0.128	0.145	0.129	0.109	0.19	0.153	0.217	0.208	0.151	0.107
541.491	0.416	0.415	0.325	0.361	0.462	0.259	0.357	0.391	0.351	0.304	0.276	0.099	0.154	0.127	0.152	0.118	0.133	0.102	0.132	0.241	0.208	0.138	0.117	0.12	0.122	0.132	0.164	0.139	0.167	0.169	0.152	0.142	0.129	0.231	0.171	0.197	0.134	0.138	0.161	0.117	0.143	0.134	0.103	0.187	0.151	0.211	0.21	0.15	0.101
542.226	0.443	0.418	0.314	0.364	0.464	0.275	0.375	0.409	0.373	0.319	0.308	0.092	0.144	0.112	0.138	0.106	0.113	0.086	0.115	0.235	0.18	0.121	0.1	0.112	0.112	0.126	0.149	0.127	0.161	0.158	0.143	0.128	0.118	0.211	0.158	0.188	0.121	0.126	0.153	0.103	0.14	0.12	0.097	0.168	0.131	0.205	0.195	0.141	0.099
542.978	0.446	0.438	0.33	0.367	0.508	0.3	0.372	0.413	0.381	0.322	0.3	0.1	0.153	0.124	0.157	0.121	0.131	0.107	0.137	0.244	0.202	0.136	0.125	0.123	0.126	0.134	0.164	0.138	0.173	0.163	0.154	0.143	0.129	0.222	0.169	0.195	0.131	0.131	0.159	0.12	0.145	0.133	0.104	0.184	0.159	0.21	0.205	0.149	0.104
543.73	0.456	0.44	0.325	0.383	0.441	0.302	0.398	0.422	0.382	0.337	0.303	0.092	0.14	0.108	0.147	0.104	0.117	0.098	0.116	0.235	0.186	0.126	0.098	0.117	0.112	0.123	0.154	0.126	0.155	0.16	0.141	0.13	0.119	0.208	0.155	0.178	0.125	0.118	0.145	0.096	0.135	0.119	0.098	0.168	0.144	0.195	0.186	0.139	0.1
544.48	0.451	0.45	0.349	0.421	0.486	0.307	0.408	0.431	0.413	0.337	0.314	0.099	0.154	0.126	0.16	0.116	0.135	0.104	0.136	0.249	0.209	0.139	0.123	0.123	0.127	0.133	0.167	0.14	0.167	0.161	0.154	0.143	0.129	0.224	0.167	0.197	0.136	0.136	0.158	0.118	0.148	0.134	0.105	0.182	0.157	0.207	0.201	0.153	0.102
545.232	0.469	0.437	0.345	0.383	0.462	0.279	0.375	0.413	0.389	0.331	0.296	0.1	0.149	0.124	0.152	0.117	0.133	0.099	0.135	0.239	0.21	0.141	0.129	0.122	0.124	0.13	0.163	0.135	0.171	0.165	0.151	0.137	0.131	0.223	0.165	0.189	0.131	0.133	0.156	0.114	0.146	0.128	0.105	0.185	0.168	0.204	0.196	0.149	0.105
545.983	0.477	0.434	0.332	0.386	0.471	0.293	0.388	0.417	0.382	0.34	0.307	0.087	0.137	0.116	0.137	0.106	0.116	0.09	0.115	0.231	0.178	0.127	0.102	0.112	0.114	0.126	0.147	0.129	0.16	0.159	0.143	0.13	0.121	0.211	0.157	0.179	0.124	0.123	0.15	0.107	0.13	0.112	0.097	0.16	0.145	0.189	0.176	0.135	0.097
546.736	0.448	0.43	0.344	0.392	0.474	0.295	0.386	0.415	0.383	0.335	0.301	0.1	0.148	0.124	0.153	0.115	0.133	0.105	0.129	0.241	0.207	0.142	0.125	0.122	0.127	0.135	0.166	0.137	0.174	0.168	0.158	0.141	0.129	0.223	0.171	0.19	0.131	0.133	0.16	0.113	0.144	0.127	0.106	0.183	0.144	0.201	0.201	0.15	0.103
547.535	0.459	0.43	0.337	0.386	0.497	0.29	0.384	0.41	0.394	0.34	0.295	0.096	0.15	0.127	0.156	0.115	0.129	0.109	0.134	0.239	0.206	0.139	0.117	0.12	0.127	0.134	0.162	0.138	0.172	0.171	0.152	0.144	0.129	0.218	0.167	0.189	0.132	0.137	0.158	0.123	0.149	0.128	0.104	0.177	0.146	0.202	0.192	0.146	0.102
548.254	0.435	0.404	0.315	0.361	0.432	0.262	0.357	0.37	0.352	0.31	0.275	0.101	0.148	0.124	0.155	0.117	0.131	0.106	0.133	0.244	0.205	0.135	0.122	0.122	0.128	0.134	0.163	0.135	0.168	0.166	0.156	0.14	0.131	0.216	0.165	0.192	0.136	0.14	0.163	0.121	0.145	0.126	0.107	0.175	0.166	0.202	0.195	0.151	0.106
[truncated: 69 more columns]

## Sheet: Figure 1F Human % Responders
	percent responders
62.5	9
125	21
250	40
500	66
1000	96
