# Supplementary material for: Keratinocyte PIEZO1 modulates cutaneous mechanosensation
Source: eLife. 2022 Sep 2;11:e65987. doi: 10.7554/eLife.65987 (PMC9512397; doi:10.7554/eLife.65987)
Supplement: Figure 2—source data 1. [file elife-65987-fig2-data1.xlsx]

## Sheet: Fig2B threshold
WT	Piezo1cKO
1.24
0.74	1.729
0.494	1.729
0.494	1.235
0.988
0.494	1.482
1.235	1.976
0.741	0.494
2.223
0.988
0.247	1.482
0.247	1.235
1.235	0.247
0.494	1.482
0.494	0.741
0.494	0.741
2.47	0.741
	0.741
0.741	1.482
	2.717
	4.446
	3.458

## Sheet: Fig2C mechanical responders
WT	Piezo1cKO
78.26	48.65

## Sheet: Fig2E Current Profile
	SA	IA	RA
WT	27.7778	22.2222	50
Piezo1cKO	38.8889	11.1111	50

## Sheet: Fig2F max current Amplitude
WT	Piezo1cKO
62	106
308	158
281	160
291
199
	45
48.8	150.5
42
	15
103
249
947	120.7
665	280
336	778
68
	101
52.6	213
25.8
	49
80	298
72.2	386.4
	32
42
	39
	15
	36
