# Supplementary material for: Keratinocyte PIEZO1 modulates cutaneous mechanosensation
Source: eLife. 2022 Sep 2;11:e65987. doi: 10.7554/eLife.65987 (PMC9512397; doi:10.7554/eLife.65987)
Supplement: Figure 3—figure supplement 1—source data 1. [file elife-65987-fig3-figsupp1-data1.xlsx]

## Sheet: Fig3 Sup1B Ad Threshold
Cre- B6PZ1 (n=33)	Cre+ B6PZ1 (n=30)
57.67	30.61
22.48	37.5
4.84	68.48
74.57	31.33
57.39	80.91
87.68	89.7
1.96	49.29
21.85	62.72
54.19	51.16
55.94	65.83
25.07	85.77
4.15	40.56
18.97	20.76
74.24	10.54
29.58	42.68
43.1	51.99
17.43	54.33
24.94	62.74
42.7	22.23
44.2	43.33
47.61	13.55
46.7	32.62
20.52	67.67
17.99	75.49
28.5	6.94
24.29	84.43
15.94	29.54
37.88	8.64
65.16	37.04
28.8	38.4
85.29
43.5
78.65

## Sheet: Fig3 Sup1C Ab Threshold
Cre- B6PZ1 (n=33)	Cre+ B6PZ1 (n=28)
15.02	32.02
55.39	52.4
44.71	25.54
76.52	84.39
71.28	85.4
45.29	78.25
42.19	33.78
38.25	23.02
34.78	6.6
90.41	44.5
30.46	37.9
22.02	65.65
57.7	20.78
32.26	13.86
30.15	61.86
12.31	24.62
37.53	40.59
27.21	58.52
32.45	19.81
81.94	30.2
12.07	62.74
11.95	50.33
21.57	83.4
54.96	30.23
50.91	8.36
20.37	36.31
18.02	73.21
88.17	21.7
33.01
31.82
13.35
46.15
38.89

## Sheet: Fig3 Sup1D C Threshold
Cre- B6PZ1 (n=30)	Cre+ B6PZ1 (n=34)
24.12	47.42
43.58	49.61
27.7	45.34
56.81	37.32
10.32	25.92
3.72	29.89
5.4	48.83
23.84	11.52
40.78	61.21
23.44	42.03
38.42	26.25
19.8	17.82
51.36	41.8
41.74	31.44
16.7	34.15
65.35	35.46
44.13	14.04
48.13	42.75
50.65	33.68
43.14	55.81
40.82	11.96
25.86	6.6
13.14	10.58
67.82	43.56
26.67	13.35
30.58	19.52
13.17	31.39
19.71	10.75
14.75	8.36
6.2	9.984
	11.93
	24.36
	18.36
	75.95
