# Supplementary material for: Keratinocyte PIEZO1 modulates cutaneous mechanosensation
Source: eLife. 2022 Sep 2;11:e65987. doi: 10.7554/eLife.65987 (PMC9512397; doi:10.7554/eLife.65987)
Supplement: Figure 3—source data 1. [file elife-65987-fig3-data1.xlsx]

## Sheet: Fig3B Ad Fiber
Force (mN)	Cre- B6PZ1 (n=33)																																		Cre+ B6PZ1 (n=30)
2	0	0	0	0.08	0	0	0	0	0	0	0	0	0	0	0	0	0.17	0	0	0	0	0	0	0	0	0	0	0	0	0	0	0	0		0	0	0	0	0	0	0	0	0	0	0	0	0	0	0
5	0	0	0.17	0	0	0	0	0	0	0	0	0	0	0	0	0	0.17	0.08	0	0	0	0	0	0	0	0	0	0	0	0	0	0	0		0	0	0	0	0	0	0	0	0	0	0	0	0	0	0
10	0	0.17	0	0	0	0	0	0.17	0	0	0	0	0	0	0	0	1.5	0	0.17	0	0	0	0	0	0	0	0	0	0.08	0	0	0	0		0	0	0	0	0	0	0	0	0	0	0	0	1.25	1.5	0
20	0.08	2.17	0.17	0	0	0	0	0.75	0	0.08	0.5	0	0.25	0	0.08	1.83	4.58	0	0.08	0	0	0.08	0	0.17	1.58	0.25	0.08	0	0.17	0	0	0.17	0		0.42	0	0	0	0	0	0	0.08	0	0	0	0	3.33	3.33	0.08
40	0.17	4.67	1.25	0	0	0	0.5	2.42	0.08	3.5	0.5	3.17	9.33	0	2.17	0.17	5.08	0.33	2.42	1	0.17	2.08	0.67	2.25	2.92	7.33	0.67	0.25	0.25	3.83	0.08	0.42	0		2.17	0.25	0.08	0.25	0	0	0	0.25	0.25	0	0	0.67	2.33	8.58	0.25
100	3	5.92	2.92	0.42	5	1.25	2.25	8.67	7.5	10	5.58	4	17.42	9.58	4.75	0.42	8.33	8.25	1.83	6.83	1	8.5	3.33	13.67	4.83	15.58	4.17	2.67	7.5	8.17	0.08	1.17	2.08		7.17	2.33	0.17	2.33	0.33	2.08	5.75	1.92	1.67	0.75	0.25	3.75	5.25	12.25	4.75
150	6.17	8.17	8.42	2.83	6.83	2.83	6.17	10	8.5	11.25	16.25	7.92	14.83	9	4.17	1.17	12.25	5.17	13.5	6.58	1.42	9.92	8.67	6.67	6.42	31.33	0.75	3.33	12.5	8.42	1.08	0.75	1		10	2.5	0.83	1.17	0.83	3.5	9.25	3.75	1.5	3.5	2	4.75	6.42	13.17	8.75
[truncated: 15 more columns]

## Sheet: Fig3D Ab Fiber
Force (mN)	Cre- B6PZ1 (n=33)																																		Cre+ B6PZ1 (n=28)
2	0	0	0	0	0	0	0	0	0	0	0	0	0	0	0	0	0	0	0	0	0.08	0	0	0	0	0	0	0	0	0	0	0	0		0	0	0	0	0	0	0	0	0.5	12	0	0	0	0	0
5	0	0	0	0	0	0	0	0	0	0	0	0	0	0	0	0	0	0	0	0	0	0	0	0	0	0	0	0	0	0	0	0	0		0	0	0	0	0	0	0	0.08	1.25	0	0	0	0.08	0.17	0
10	0.08	0	0	0	0	0	0	0	0	0	0	0	0.5	0	0	0	0	1.42	0	0	0	0	1.58	0	0	0	0.08	0	0	0	0	0	0.33		0	0	0	0	0	0	0.08	0	0.75	0	0	0	0.33	0.33	0
20	0.75	0	0	0	0	0	0	0	0	0	2.08	1.5	3	0.25	0	0.08	0	6.75	0.58	0	3.42	1.67	7.33	0.08	0.08	1.42	0.25	0	0	0.08	0	0.17	0.17		0.17	0.17	0.08	0	0	0.08	0.17	0.25	0.17	0	0	0.08	0.25	2.83	0
40	1.58	0.42	2.58	0.08	0	0.17	0.08	2	1.67	0.08	4.92	7.33	8.58	3.17	0.33	1.83	0	9.33	0.58	1.67	9.08	8.17	10.17	0.33	0.17	3.58	1.17	0.08	0.33	0.25	0.08	0.83	0.5		1.42	1.08	3.83	0	0.08	0.25	0.75	1.25	0.42	0.83	0.58	0.5	0.5	4.83	0
100	3.42	3.92	7.58	3.58	1	2.83	1.33	6.67	8.25	1.5	4.92	12.25	0.33	8.42	5.33	4.33	0.17	6.25	5.83	6.67	9.58	13.17	6.58	1.42	0.83	4.33	3.92	0.67	2.58	5.75	0.5	8.08	4.5		4.33	2.58	7.17	2	1.25	0.83	0.92	4.42	0.75	3.08	4.83	2.92	4.33	8.17	3.83
150	4.08	6.83	3.25	2.17	1.58	2.5	1.58	7.92	10.75	1	4.5	9.17	0.08	10.67	6	3.08	2.67	4	17.08	12.25	5.92	9.33	4.25	4.17	1.92	4	4.75	4.92	1.67	10.42	6.92	8.75	9.42		8.33	1	9.92	3.92	5.75	4.08	1	7	2.5	7	4.33	5.75	4	5.92	5.5
[truncated: 13 more columns]

## Sheet: Fig4F C Fiber
Force (mN)	Cre- B6PZ1 (n=30)																																		Cre+ B6PZ1 (n=34)
2	0	0	0	0	0	0	0	0	0	0	0	0	0	0	0	0	0	0.08	0	0	0	0	0.08	0	0.42	0	0	0	0	0					0	0	0	0	0	0	0	0	0	0	0	0	0	0	0
5	0	0	0	0	0	0.08	0.08	0	0	0	0	0.08	0	0	0	0	0	0	0	0	0	0	0	0	0.67	0	0	0	0	0.33					0	0	0	0	0	0	0	0.08	0	0	0	0	0	0	0
10	0	0	0.17	0.08	0	1.33	1.42	0	0	0	0	0.33	0	0	0.08	0	0	0.08	0	0	0	0	0.5	0	0.67	0	4.5	0.17	0	0.5					0	0.08	0	0	0	0	0	0.17	0	0	1.25	1	0	0	0
20	0.33	0.08	0.92	0.25	0.92	1.58	1.67	0.17	1.42	0.33	0.08	2	0	0.08	1.75	0	0	0.25	0.25	0	0	1.67	3.08	0.17	0.67	0.08	0.25	0.17	0.67	0.42					0.42	0	0	0.17	0.25	0.08	0.08	1.17	0.08	0	2.42	6.25	0.25	0	0.17
40	3.33	1.25	3	1.17	7.92	2	2.08	3.08	2.83	1.67	3.33	4.42	2.67	2.5	3	0	0.08	0.08	0.17	0.08	0.92	5.17	4.92	0.17	0.75	0.17	0.75	0.92	4.33	1.92					0.92	0.5	0	1.5	4.08	1.58	0.67	2.92	0	0.42	2.75	8.5	3.75	0.58	3.67
100	4.42	7.58	8.67	7.25	11.5	6.67	6.83	9.42	2.17	6.67	12	7.92	6.83	6.17	7.5	0.67	3.58	0.17	3.58	8.67	5.42	12.42	9.17	1	1.92	2.17	3.17	5.08	3.75	3.42					7	6.92	4.25	2.33	8	3.92	5.25	12.17	0.33	4.25	9.92	12	10.25	4.33	7.58
150	4	8.92	4.75	7.92	13.5	8.5	8.33	6.75	0.08	9.67	9.5	8.58	5.42	7.67	6.25	3.33	9.33	1.33	5.25	10.83	5.83	11	10.92	0.58	2.17	3.42	7.58	8.92	6	3.83					7.58	8.08	8.17	3.5	10.83	6.08	7.33	12.58	1.25	1.92	5.33	11.67	5.67	9.67	7
[truncated: 19 more columns]
