# Supplementary material for: Keratinocyte PIEZO1 modulates cutaneous mechanosensation
Source: eLife. 2022 Sep 2;11:e65987. doi: 10.7554/eLife.65987 (PMC9512397; doi:10.7554/eLife.65987)
Supplement: Figure 4—source data 1. [file elife-65987-fig4-data1.xlsx]

## Sheet: Fig4A Yoda1 Induced Behavior
vehicle	10μM	100μM	1mM
34.17	9.4	123.25	71.71
16.35	52.81	58.25	114.86
27.33	76.6	96.64	149.05
13.36	67.43	121.31	120.81
9.13	66.5	91.01	177.64
44.89	154.63	117.9	107.08
23.59	157.9	101.75	120.64
15.03		138.98	130.04
21.03		111.99	102.07
46.67		88.5	146.28
67.61			124.39
12.34			86.25

## Sheet: Fig4B Yoda1 Induced wt vs KO
	vehicle										Yoda1
K14Cre- Piezo1	12.58	47.31	47.07	29.49	10.76	35.55	11.41	21.83			118.7	136.84	110.75	96.75	123.9	156.13	102.28	190	158.26
K14Cre+ Piezo1	65.69	20.34	13.7	36.444	105.85	18.08	13.48				17.31	36.49	19.72	40.29	34.03	24.12	47.87	18.82

## Sheet: Fig4D C Fiber Yoda1 wt mech
Force (mN)	Veh (n=16)																	Yoda1 (n=17)
2	0.333333	0	0	0	0	0	0	0	0	0	0	0	0	0	0	0		0	0	0	0	0	0	0	0	0	0	0	0	0	0	0	0	0.08
5	0	0	0	0	0	0	1.91667	0.166667	0	0	0.08	0	0	0	0	0		0	0	0	0.666667	0.166667	0	0	0	0	0	0	0.833333	0.25	0	0	0	0
10	0.0833333	0.333333	0	0.0833333	0.25	1.33333	0.333333	1.16667	0	0	0.33	0	0	0.08	0	0		0	0	0	0.666667	0.333333	0	0	0	0	0	0	4.83333	2	0	0	0	0.5
20	2.16667	7.58333	0	0.583333	1.41667	4.66667	1.33333	3.33333	0	2	2	0	0.08	1.75	0	0		1.66667	1.25	0	2.91667	1.75	0.833333	0	0.166667	3.25	0	0.333333	6.16667	5.25	0.0833333	0	1.67	3.08
40	3.75	7.58333	0.5	2.66667	2.08333	6.33333	3.41667	8.16667	0	3.16667	4.42	2.67	2.5	3	0	0.08		2.75	2.16667	4.58333	6.58333	3.25	4.58333	0.416667	1.58333	7.75	0	3	12.5	10.8333	0.5	0	5.17	4.92
100	4.16667	7.91667	5.5	6.66667	3.41667	6.91667	5	10.8333	0.5	1.91667	7.92	6.83	6.17	7.5	0.67	3.58		9.58333	7.83333	14.1667	10.1667	4.33333	6.25	1.83333	6.75	9.83333	1.58333	13.75	12.25	10.9167	5.91667	6.16667	12.42	9.17
150			6.66667	8.58333	2.5	7.16667	5.08333	11.1667	7.08333	5.83333	8.58	5.42	7.67	6.25	3.33	9.33		11	8.83333	15.1667	10.5	3.08333	7.33333	3.33333	7.41667	10.1667	11.3333	15.8333	8.5	8.41667	8.5	5	11	10.92

## Sheet: Fig4F C fiber Yoda1 KO mech
Force (mN)	Veh KO (n=16)																	Yoda1 KO (n=15)
2	0	0	0	0	0	0	0.0833333	0	0.166667	0	0	0	0	0.666667	0.333333	0.0833333		0	0	0	0	0	0	0	0.166667	0	0	0	0	0.166667	0	0
5	0	0	0	0	0	0	3.66667	0.5	0	0	0	0	0	0.666667	0.333333	0		0	0	0	0.0833333	0	0	0.333333	3.41667	0.0833333	0.333333	0.25	0	0.5	0	0.08
10	0	0	0.0833333	0	0	0	2.66667	3.33333	0	1.75	0.333333	0.0833333	1.41667	1.16667	1	0.0833333		0	0.166667	0.0833333	0.0833333	1.5	0	0.5	4	1.66667	0.666667	0.583333	0.01	0.583333	1	1.42
20	2.33333	0.75	0.25	0.75	0.416667	0.166667	1.16667	5.75	1.33333	4.16667	2.66667	1.08333	2.83333	2.33333	3.25	0.25		0.416667	3	0.25	0.833333	2.25	0.666667	0.416667	4.66667	5.41667	5.91667	5.41667	0.0183333	0.75	2.33333	1.67
40	3.5	3.83333	0.166667	3.83333	3.25	0.583333	6.58333	5.91667	2.75	7.66667	3.08333	1.08333	2.16667	5.41667	4.91667	0.0833333		1.66667	7.5	4.16667	2	4.16667	4.33333	1.91667	6.41667	11.75	16.5	6.25	0.320833	2.33333	3.25	2.08
100	8.16667	8.83333	1.41667	8.83333	8.16667	3.75	7.83333	7.75	10.9167	12.9167	4.08333	2.91667	0.0833333	8.33333	4.5	0.166667		2.08333	5.5	7.66667	8.41667	5.58333	3.75	3.41667	4.5	11.5833	17.75	12.5	0.628333	4.83333	4.25	6.83
150	10.25	10.5833	1.91667	10.5833	7.91667	6.5	6.58333	9.58333	14.0833	12.8333	6.33333	4.91667	3.39833	10.3333	4.83333	1.33333		2.5	6.66667	3.83333	19.25	5.25	6	3.83333	6.25	10.1667	12.3333	11.6667	0.251667	3.5	4.5	8.33

## Sheet: Fig4G von Frey Yoda1 wt vs KO
	vehicle								Yoda1
wt	4.63688	4.04731	4.63688	2.92567	2.92567	2.92467	3.77447		0.39381	0.55054	0.47989	0.44346	0.37635	0.0882	0.94673
PIEZO1cKO	5.69634	6.40068	6.40068	7.97381	6.40068	7.86314	7.60582		6.69262	8.24764	8.25764	4.63688	5.21022	5.03114	5.44786
