# Supplementary material for: Keratinocyte PIEZO1 modulates cutaneous mechanosensation
Source: eLife. 2022 Sep 2;11:e65987. doi: 10.7554/eLife.65987 (PMC9512397; doi:10.7554/eLife.65987)
Supplement: Figure 5—figure supplement 1—source data 1. [file elife-65987-fig5-figsupp1-data1.xlsx]

## Sheet: Fig5 sup1A percent responders
	1	2	3	brush	needle
wt	80	90	100	90	70
piezo1cKO	10	40	60	60	80

## Sheet: Fig5 sup1B paw height
	wt											piezo1cKO
1	4.89977	4.39029	3.81738	5.63098	13.4162		10.1667	5.31817		6.776											4.29397
2		7.77136	7.35406	5.06103	8.17402	6.40561	6.725	6.4653	8.52836	5.45152			7.03997	5.42827						4.60339	3.62423
3	4.60632	5.16773	8.62027	6.43321	7.51139	7.15111	10.7478	6.91247	9.04075	6.07723			5.68663	7.56346		11.1966		3.65905	6.75241	8.6803
brush	5.62328	3.22052		8.73939	7.42944	13.048	9.23806	10.1809	9.25569	3.3416			4.15109		5.34796	5.81341		4.7969	6.07477	4.73618
needle	7.17145	10.1916		4.53326	10.2251		6.0208	12.3439	11.6159			6.06556	3.35318	4.69877	11.2436		4.4329	4.43746		7.76592	5.57186

## Sheet: Fig5 sup1C paw velocity
	wt											piezo1cKO
1	367.961	195.576	705.677	830.524	489.629		934.627	593.521		819.035											550.79
2		277.172	1051.2	406.736	409.834	617.632	653.319	506.822	632.932	462.405			127.127	759.359						216.243	351.182
3	1505.75	524.852	795.815	290.32	814.43	635.853	819.047	446.023	1172	817.351			265.498	234.79		207.426		346.913	572.748	711.845
brush	536.917	189.794		1333.51	619.306	347.373	971.302	693.413	1034.62	595.632			646.204		441.695	347.142		531.38	326.548	404.002
needle	1278.68	814.558		1939.44	1132.71		498.016	1201.35	1025.85			782.416	559.357	486.845	1063.62		506.283	203.8		1068.83	798.189

## Sheet: Fig5 sup1d pain score
	wt											piezo1cKO
1	0	0	1	1	3		2	2		1											1
2		0	1	1	1	2	1	1	1	1			0	0							1
3	2	1	1	1	1	1	3	1	1	2			1	1		0		1	1
brush	0	0		2	0	2	1	0	1	3			1		1	1		1	2	1
needle	2	0		1	1		2	2	0			1	1		1		0	0		0	0
