# Supplementary material for: Keratinocyte PIEZO1 modulates cutaneous mechanosensation
Source: eLife. 2022 Sep 2;11:e65987. doi: 10.7554/eLife.65987 (PMC9512397; doi:10.7554/eLife.65987)
Supplement: Figure 5—source data 1. [file elife-65987-fig5-data1.xlsx]

## Sheet: Fig5A von frey
K14Cre- Piezo1	K14Cre+ Piezo1
1.99216	7.31669
2.41133	14.2461
2.58519	6.94433
3.14113	5.68624
3.43422	12.9399
2.27009	3.64613
2.81688	6.04689
2.07975	8.11631
0.448369	6.2798
2.81688	5.46254
	5.56169
	7.63529

## Sheet: Fig5B suprathreshold
K14Cre- Piezo1	K14Cre+ Piezo1
50	10
55	5
55	30
40	15
45	5
40	25
60	30
45	5
40	5
35	30
	15
	20

## Sheet: Fig5C static light touch
K14Cre- Piezo1	K14Cre+ Piezo1
30	15
35	5
30	5
45	15
35	5
30	0
25	15
40	5
45	5
35	20
	10
	25

## Sheet: Fic5D Brush
	Normal	Noxious	No Response
K14Cre- Piezo1	51	28	21
K14Cre+ Piezo1	29	20	54

## Sheet: Fig5E Needle
	Normal	Noxious	No Response
K14Cre- Piezo1	51	40	9
K14Cre+ Piezo1	29	27	44

## Sheet: Fig5F Hargreaves Heat
K14Cre- Piezo1	K14Cre+ Piezo1
9.5	8.6
8.6	9
8.7	9.6
8	9.8
9.1	10.6
8.4	9.3
7.6	7.9
8.1	9.5
8.8	8.3
9.2	8.2

## Sheet: Fig5G Cold
K14Cre- Piezo1	K14Cre+ Piezo1
5	4.4
4.6	4.5
4.1	4.7
4.4	5.2
4.6	4.9
3.9	4.2
4.6	4.6
4.9	4
4.8	4
4.3	3.9

## Sheet: Fig5H high speed cummulative z
		WT										PIEZO1cKO
	0.6g	-2.84639	-3.53897	-1.02025	0.0480582	4.69876	3.41043	0.533413	0.464406			-1.27599
	1.4g	-1.97937	1.35476	-1.38682	-0.156751	1.02893	-0.0292567	-0.549859	0.619922	-1.07451		-2.69516	-1.52035	-3.3963	-2.10925
	4g	2.86153	-1.00736	1.12154	-1.18126	0.739734	0.0879822	4.59352	-0.548214	2.36171	1.47095	-1.54509	-0.896588	-0.835016	-2.1078	-0.248795	-0.3804
	brush	-2.07964	-4.01439	3.99061	0.111503	1.57676	1.86548	0.155596	2.05337	1.04953		-1.05933	-1.17433	-1.262	-1.13417	0.0671513	-1.52207
	needle	3.21879	0.506054	2.78697	2.71403	0.536074	5.02689	1.66872				0.0810379	-1.62057	-2.58544	2.91611	-2.63418	-3.49696	0.281241	-1.35303

## Sheet: Fig5I high speed average z
WT	PIEZO1cKO
0.288573	0.0810379
-2.00681	-1.73004
0.485348	-1.66746
0.851512	0.870886
1.62146	-1.04851
0.897889	-2.63418
2.07525	-2.24631
0.923566	-0.0908218
1.67593	-1.25438
0.477591	-1.57943
